# Supplementary material for: Microhabitat change drives diversification in pholcid spiders
Source: PubMed Central journal article supplement (PMC6145181; doi:10.1186/s12862-018-1244-8), 2018-09-19
Supplement: 12862_2018_1244_MOESM1_ESM.pdf [file 12862_2018_1244_MOESM1_ESM.pdf]

## 1 Supplementary Figures

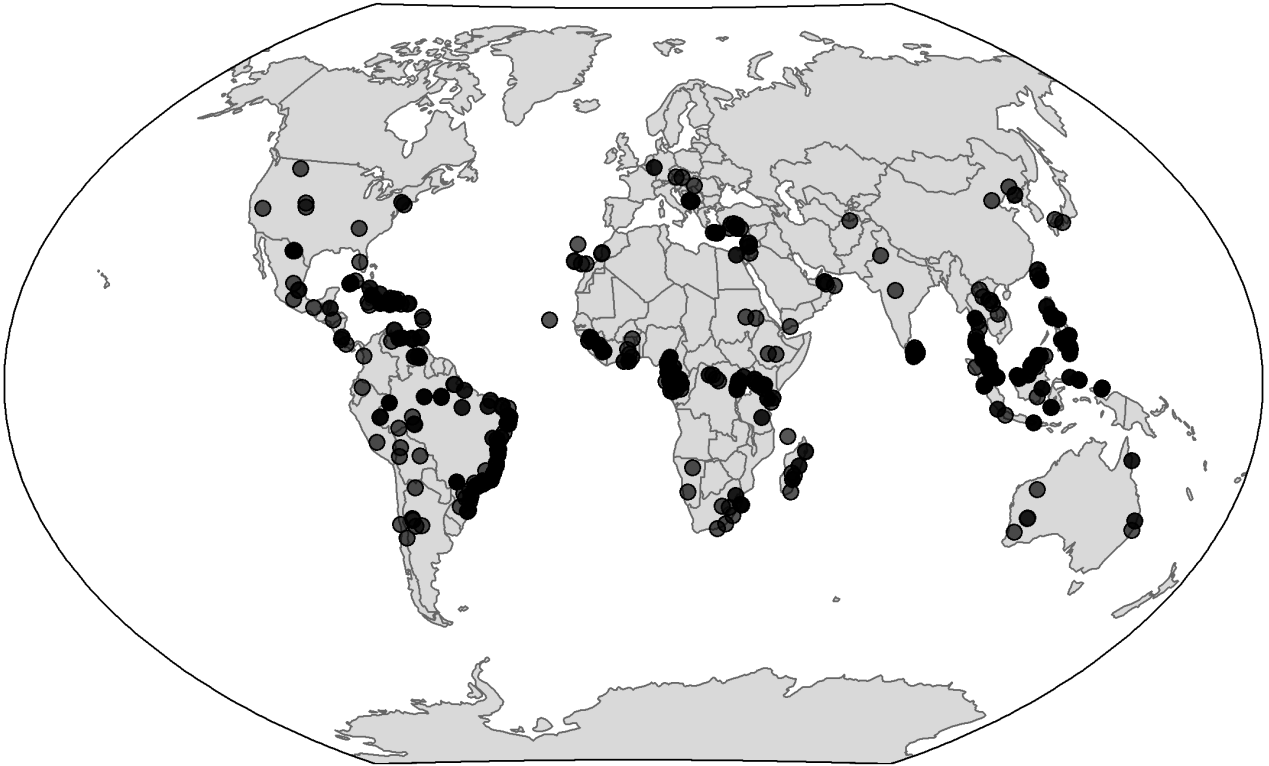

**Figure S1:** Map of sampling locations of all specimens included in the phylogenetic analyses.

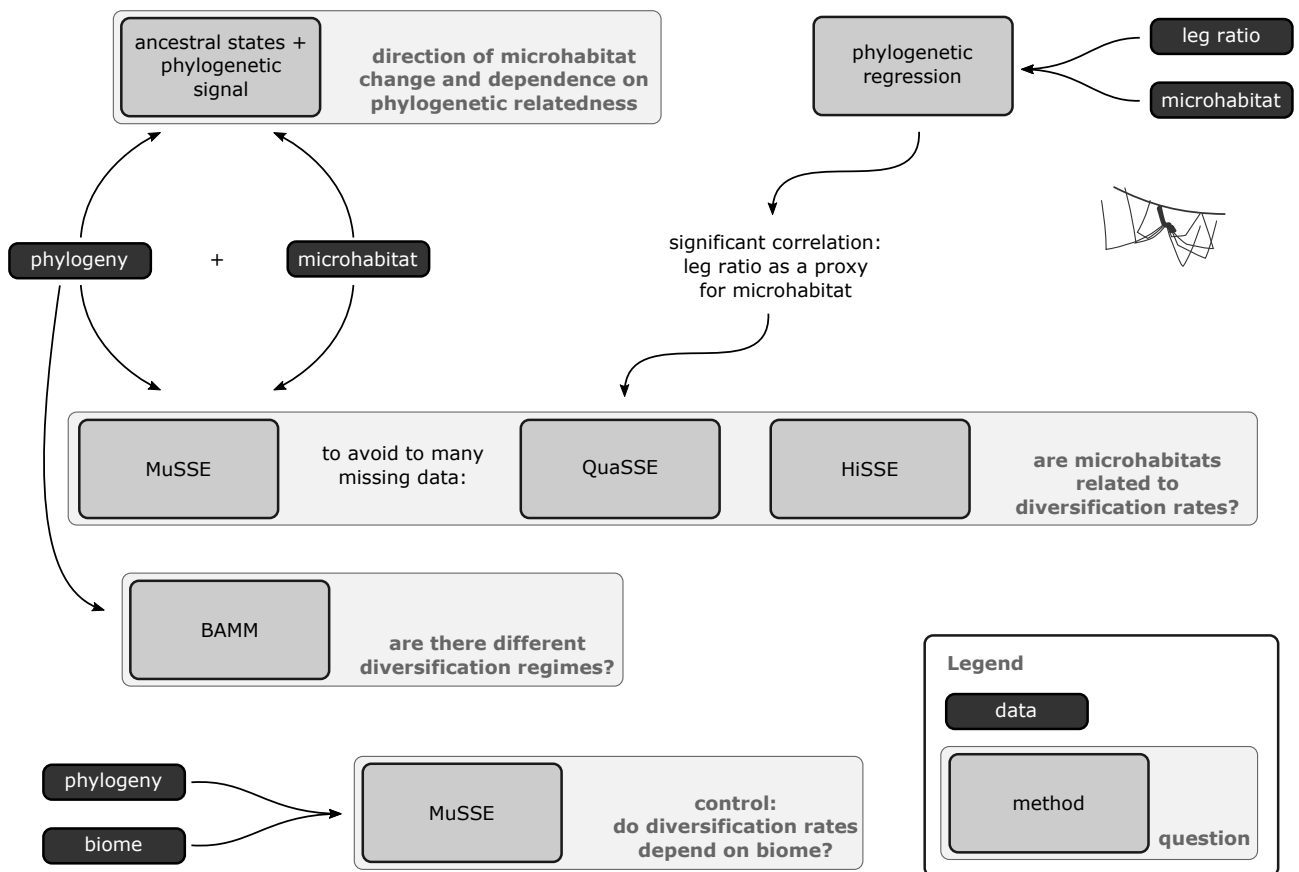

**Figure S2:** Workflow and overview of diversification analyses.

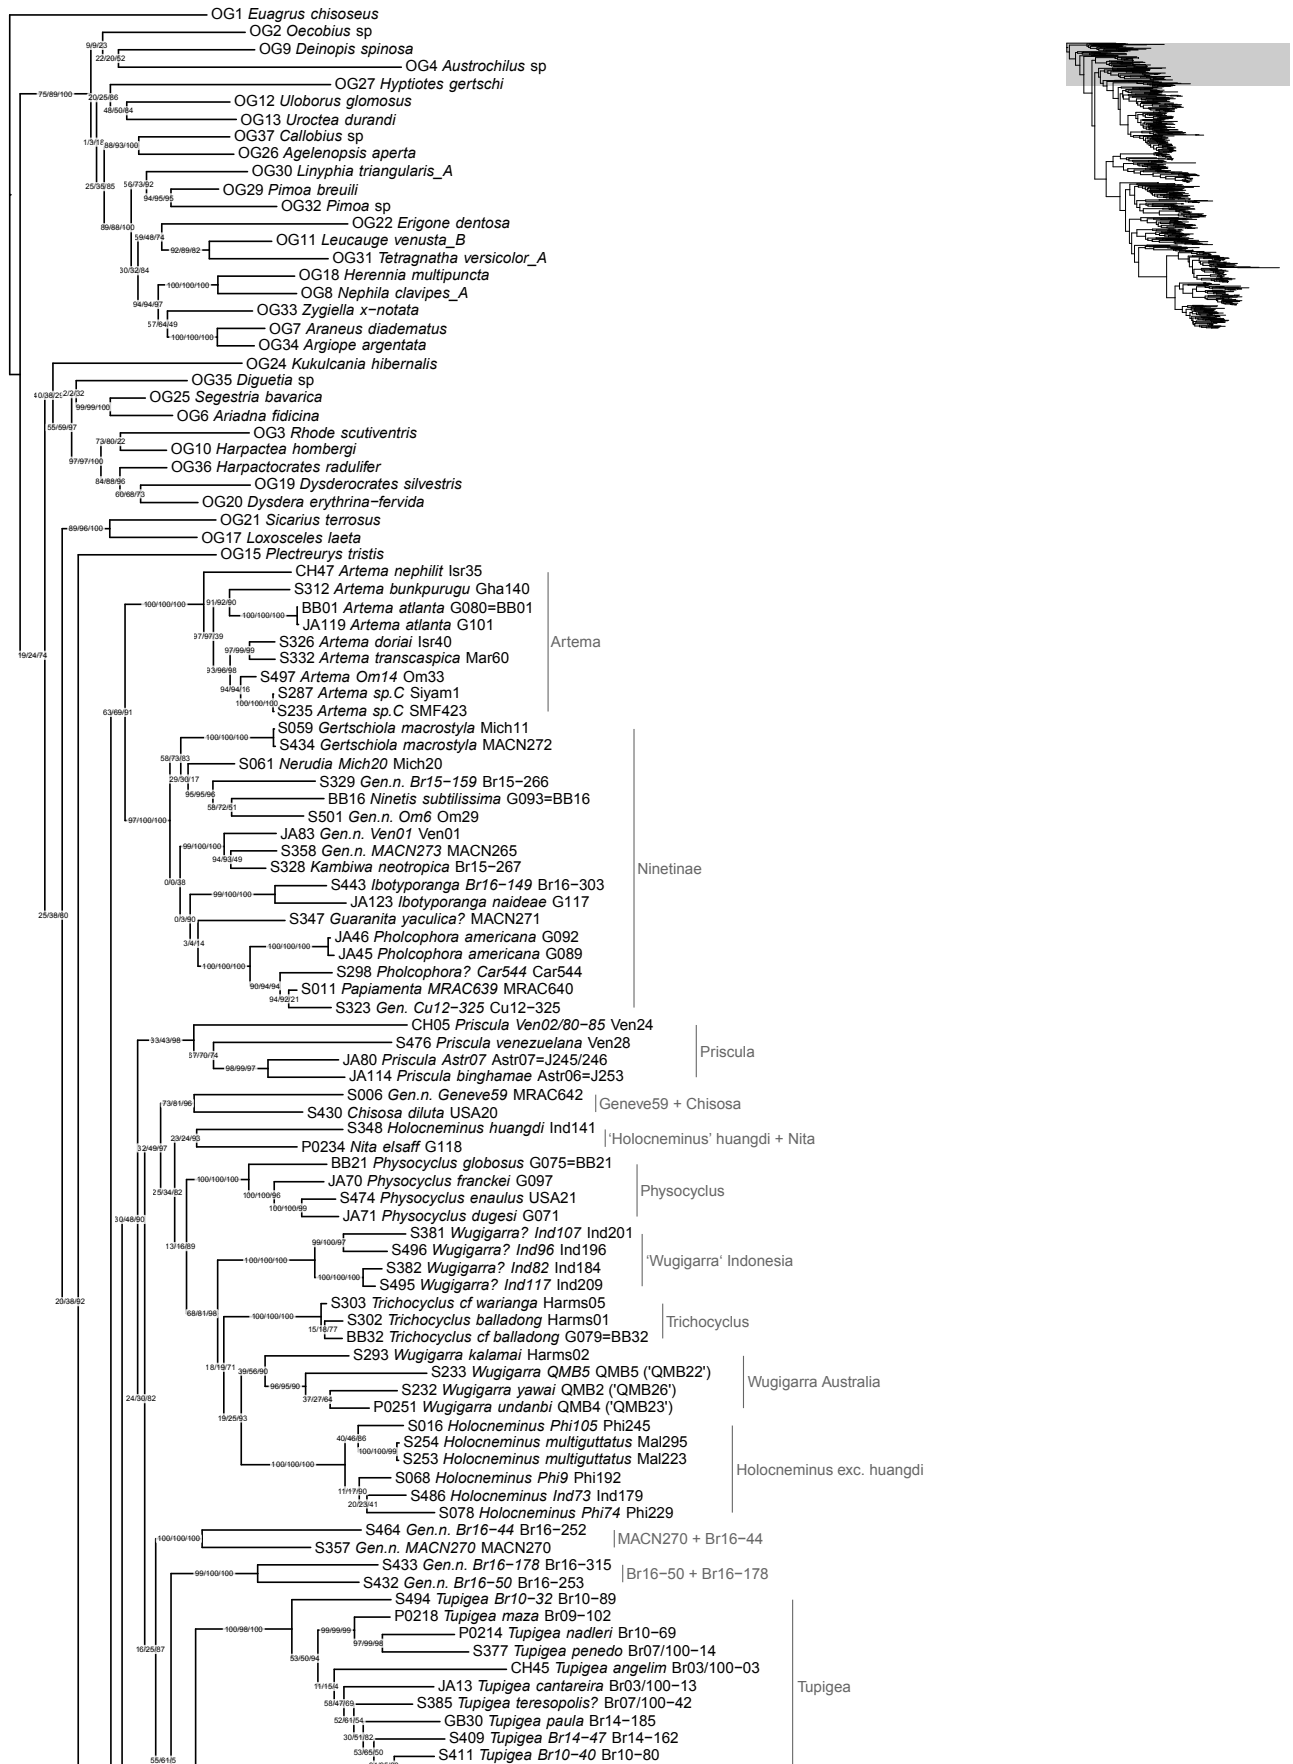

Figure S3 (a). Caption on page 9.

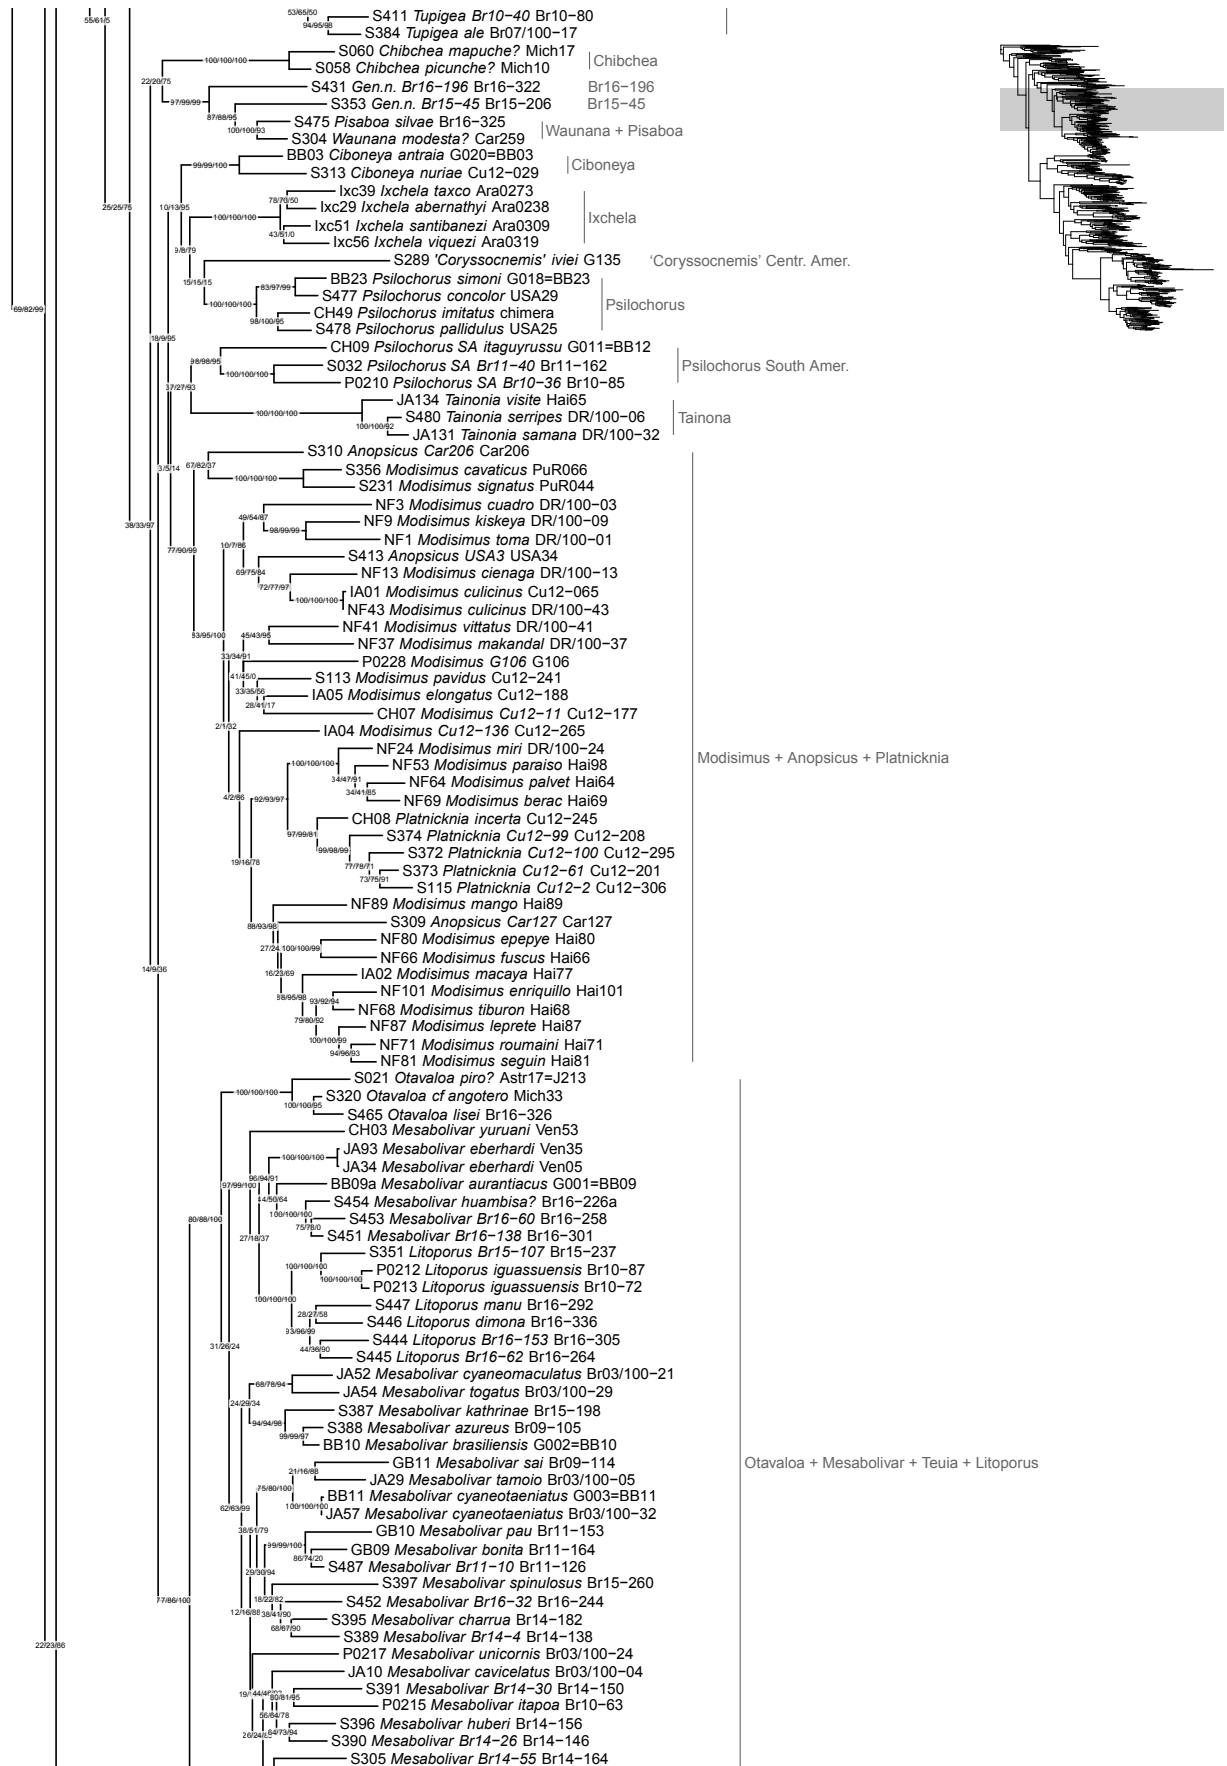

Figure S3 (b). Caption on page 9.

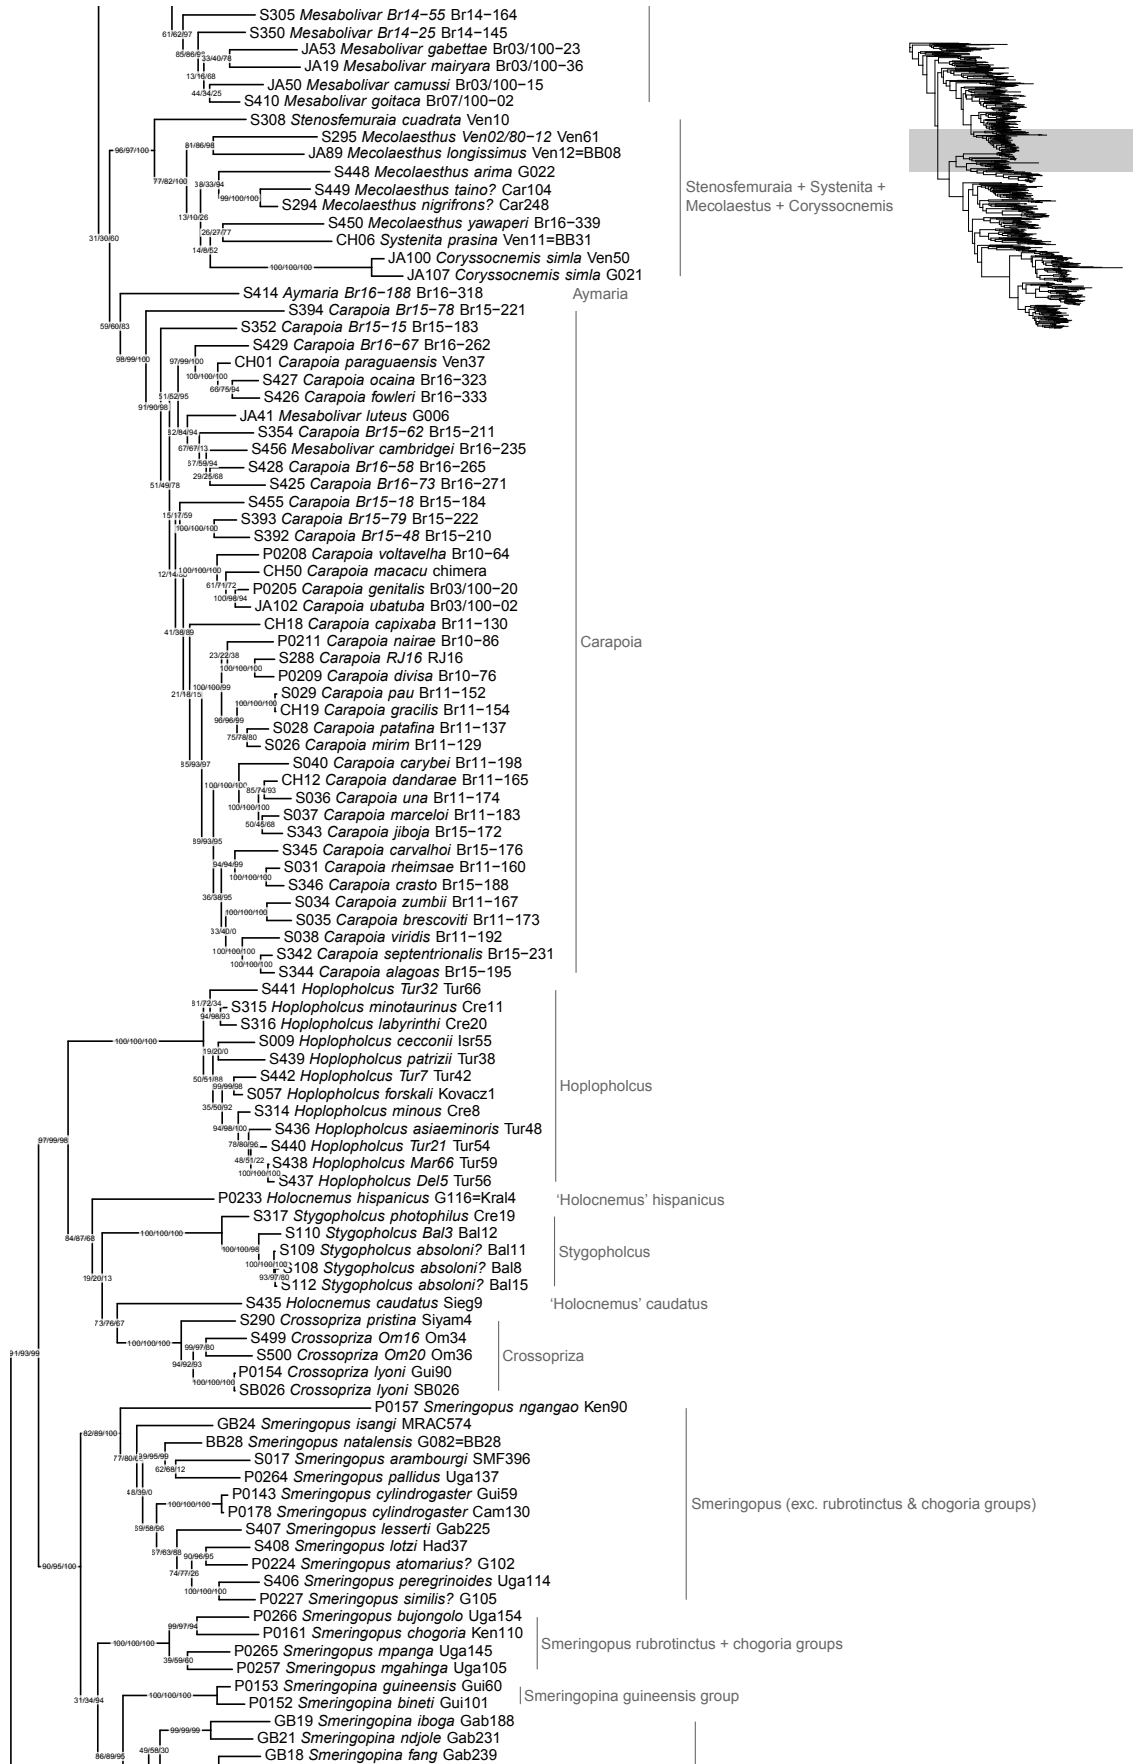

Figure S3 (c). Caption on page 9.

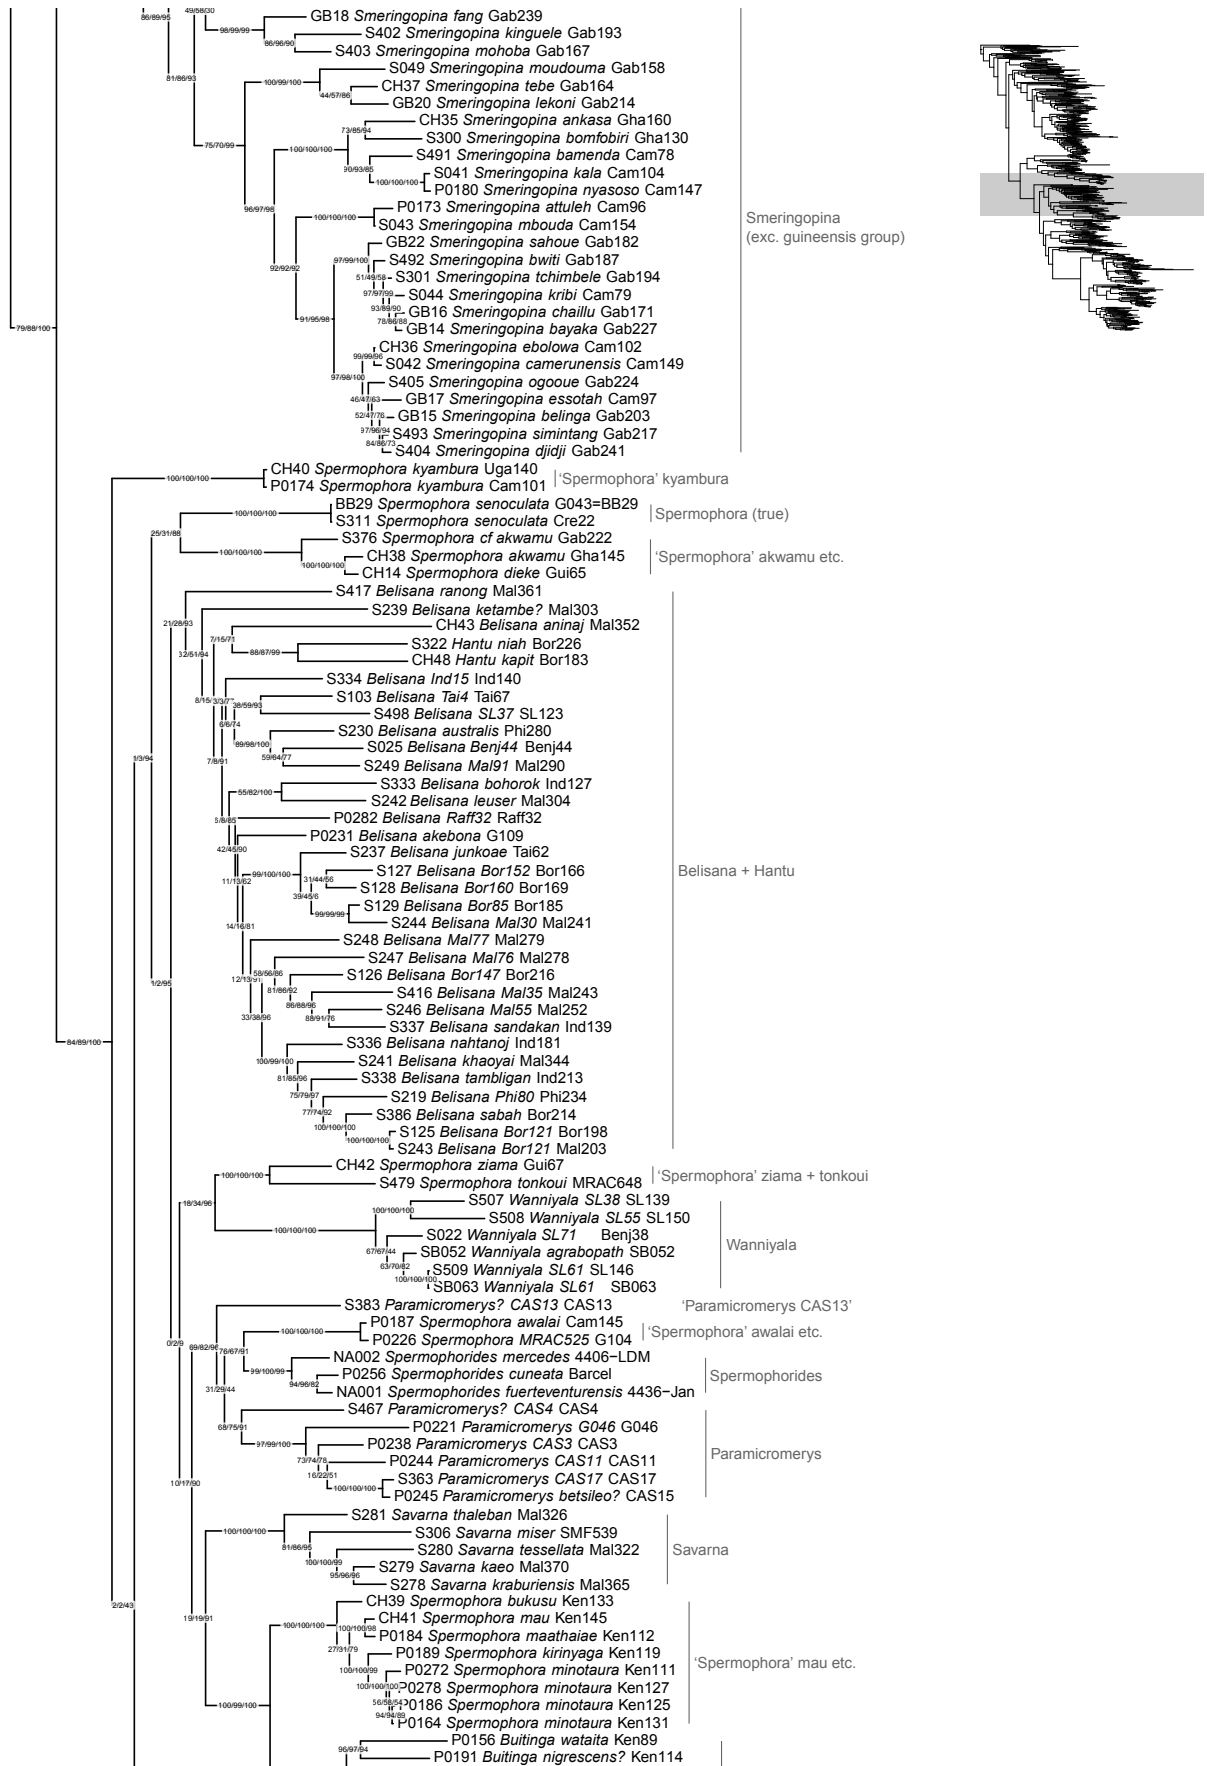

Figure S3 (d). Caption on page 9.

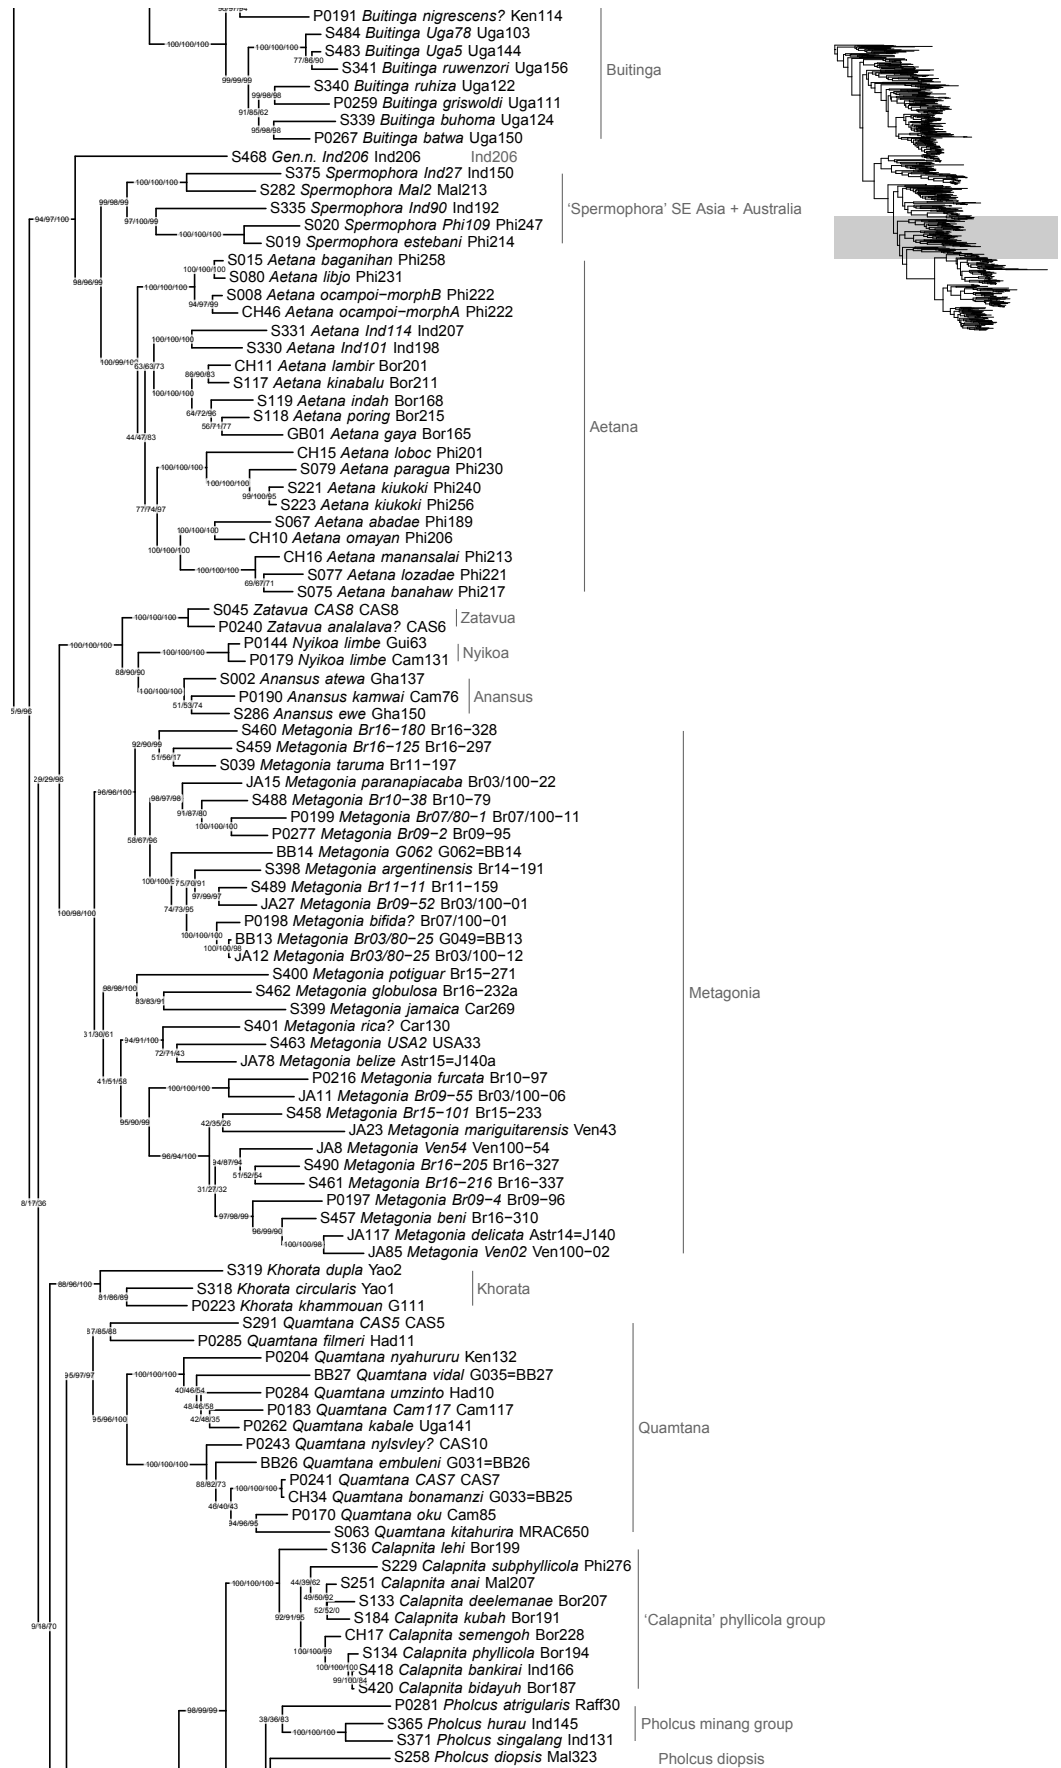

Figure S3 (e). Caption on page 9.

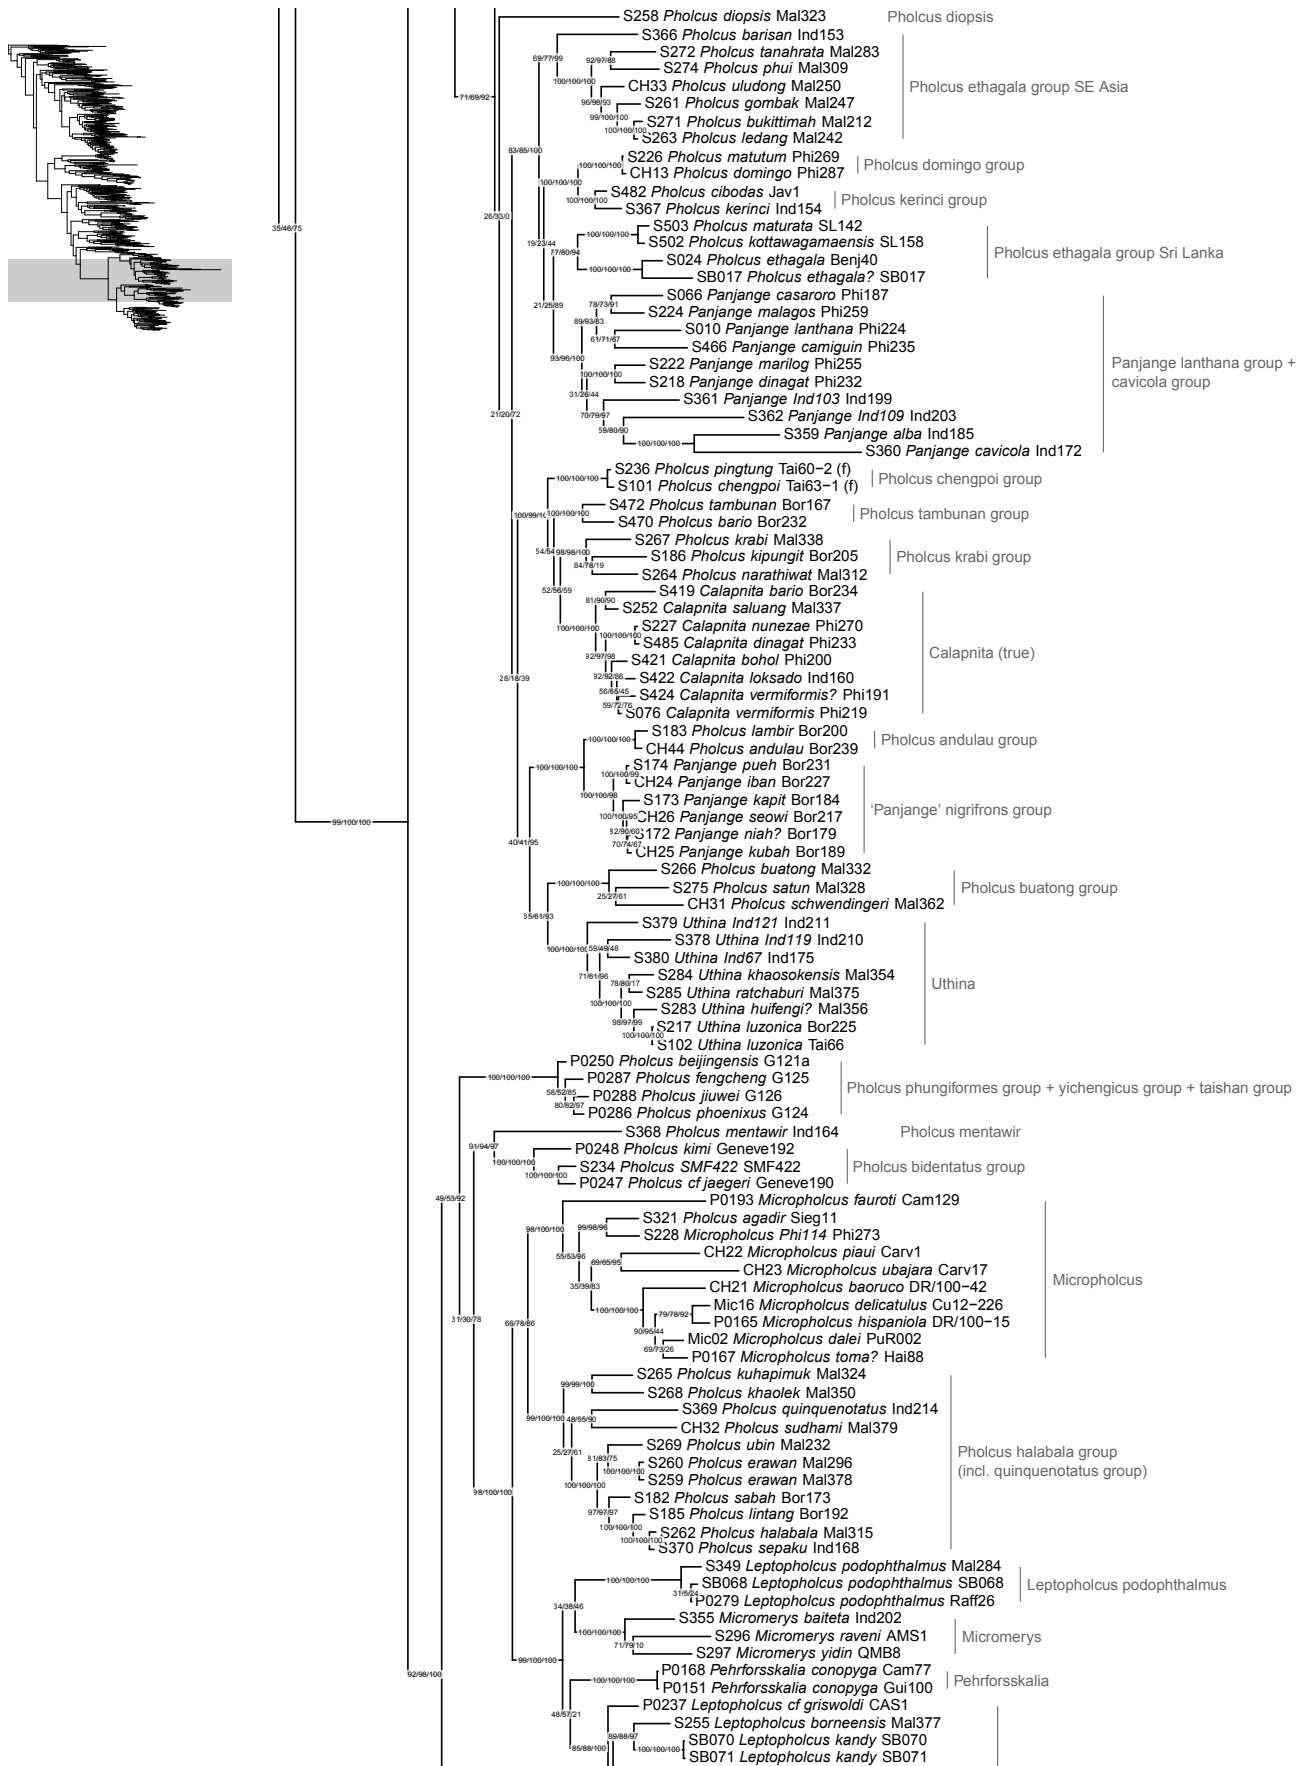

Figure S3 (f). Caption on page 9.



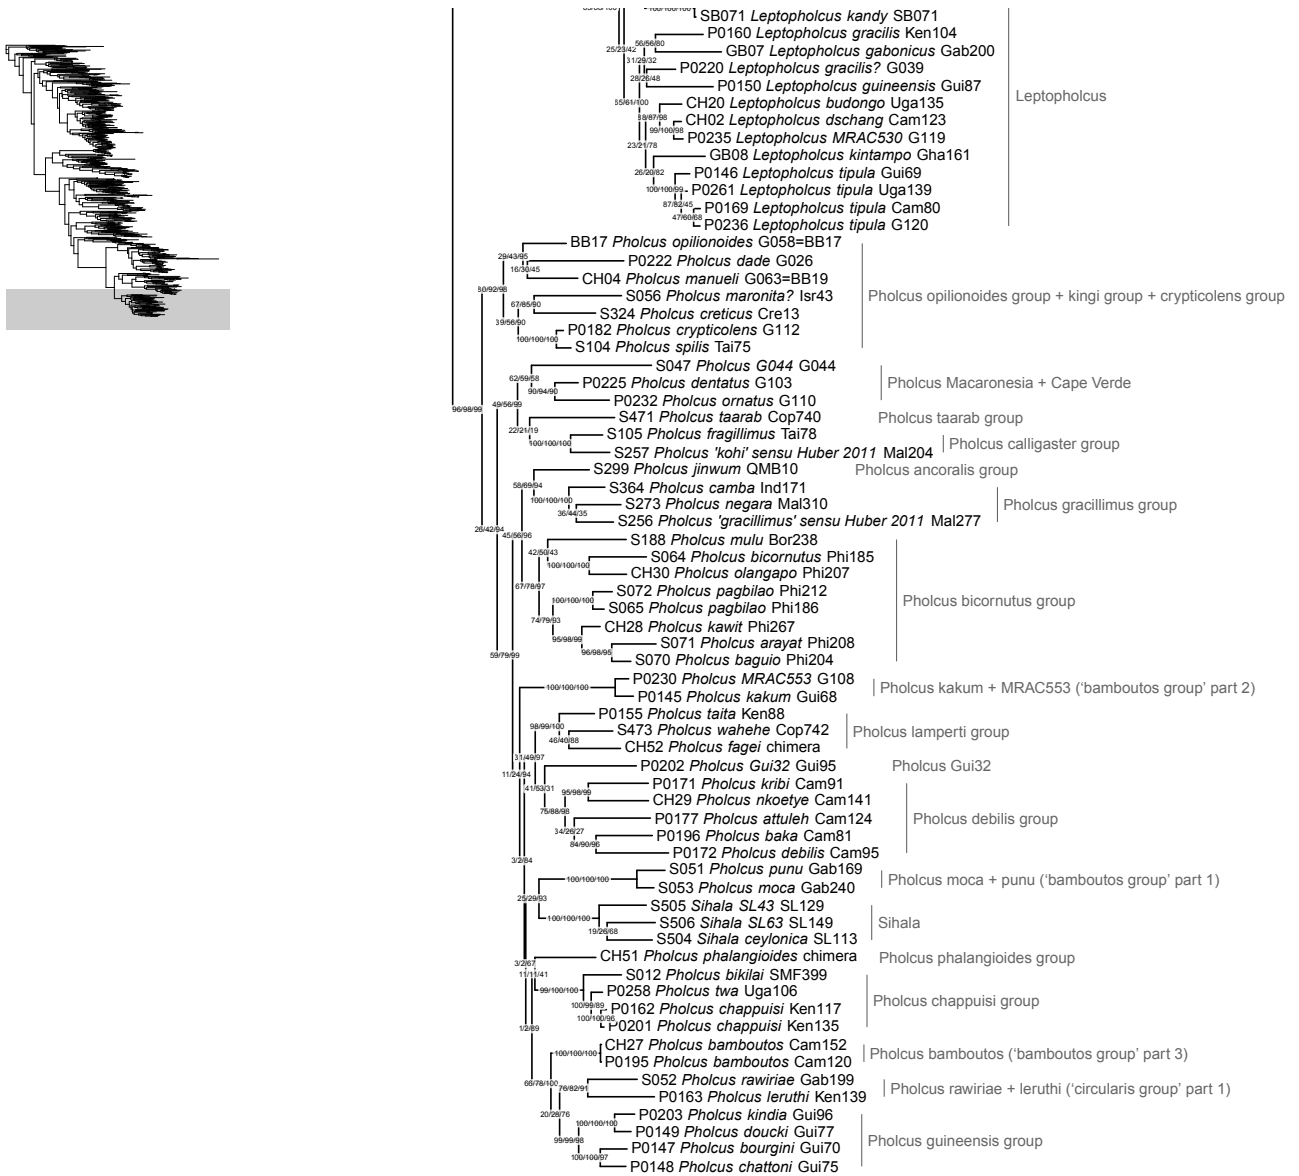

**Figure S3 (g).** Best maximum likelihood tree found by RAxML for the complete sampling. Branch support values are standard bootstrap, rapid bootstrap and SH-like aLRT values, respectively, separated by a slash. Tip labels are composed of the specimens' code, species name, and collection vial number.

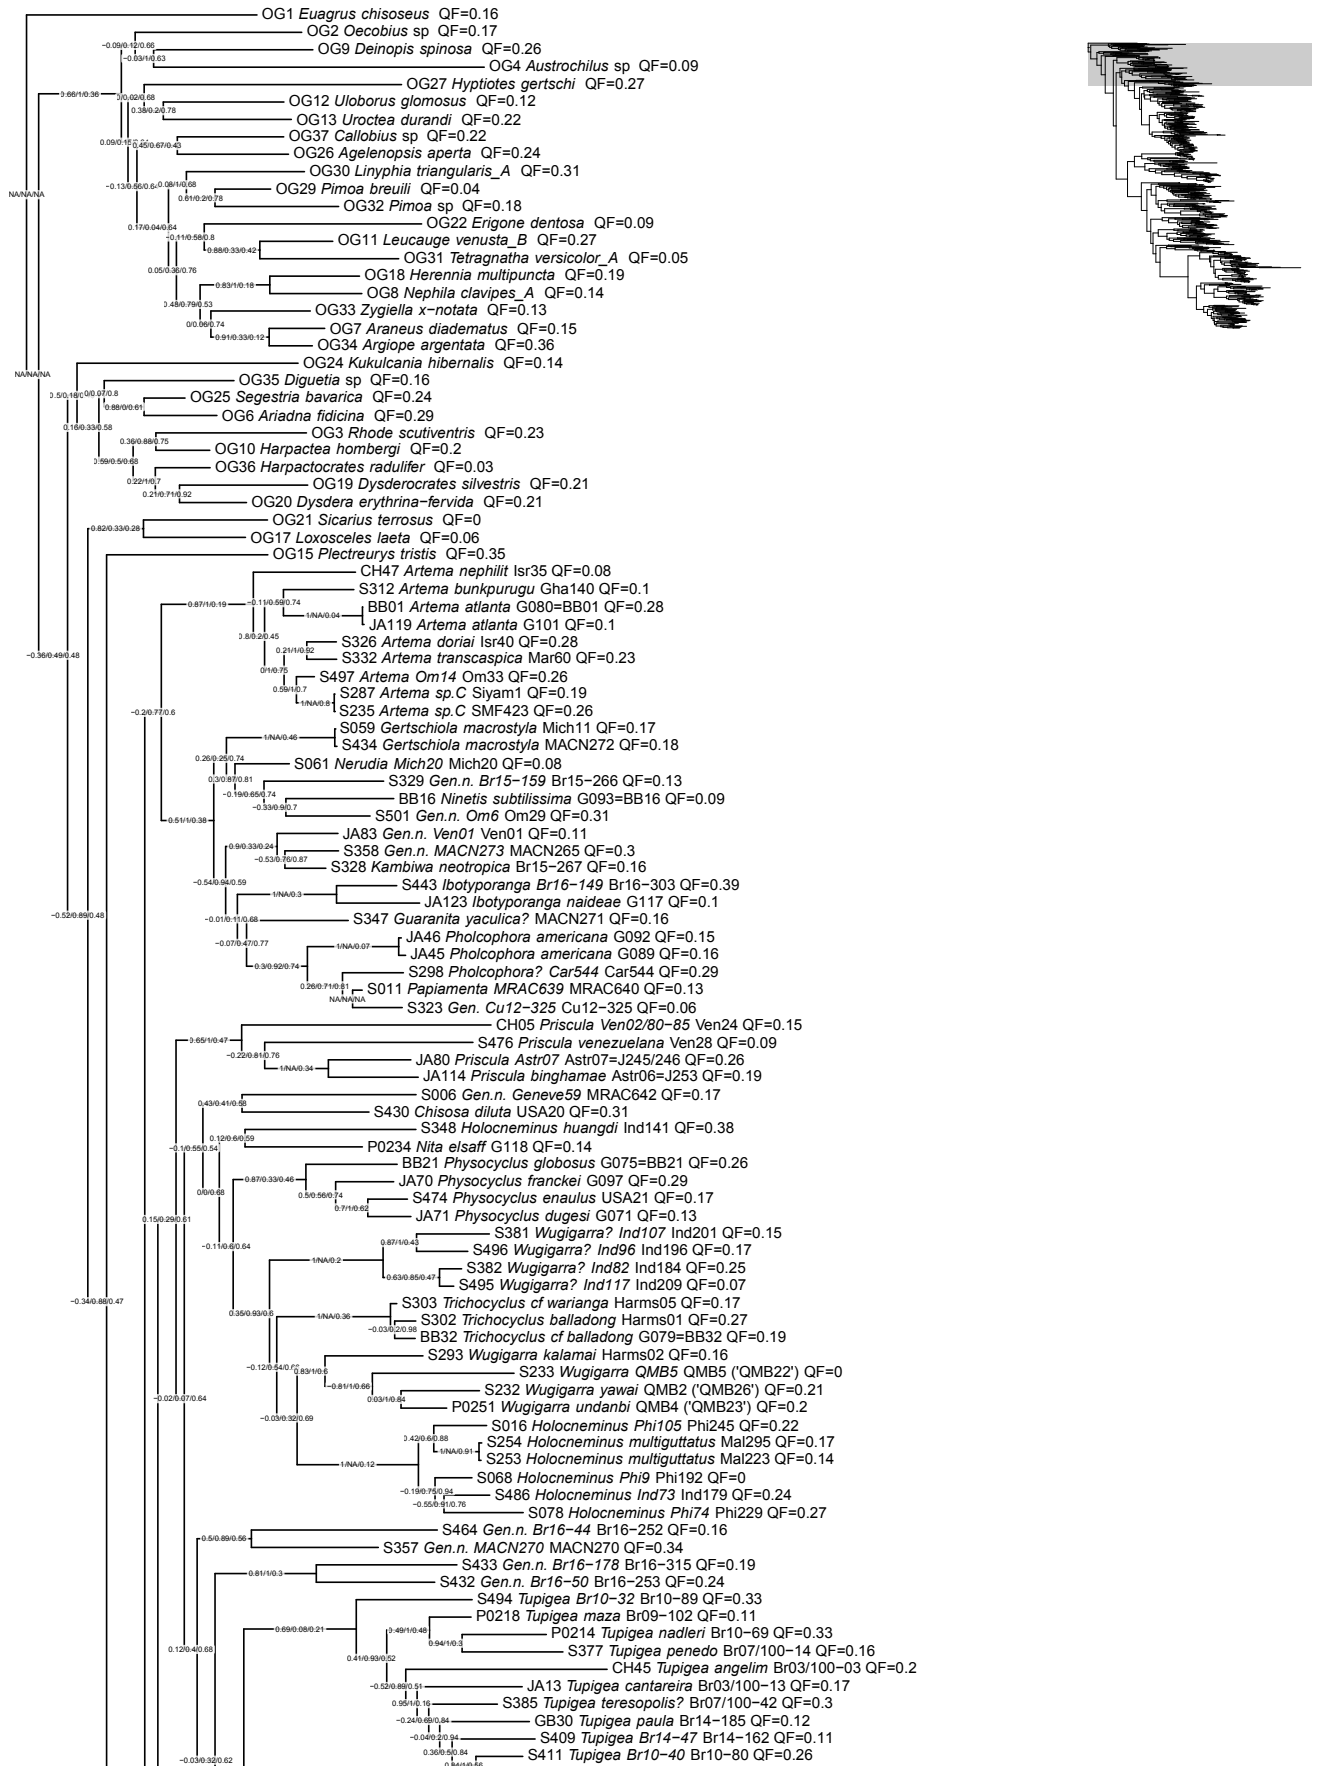

Figure S4 (a). Caption on page 16.

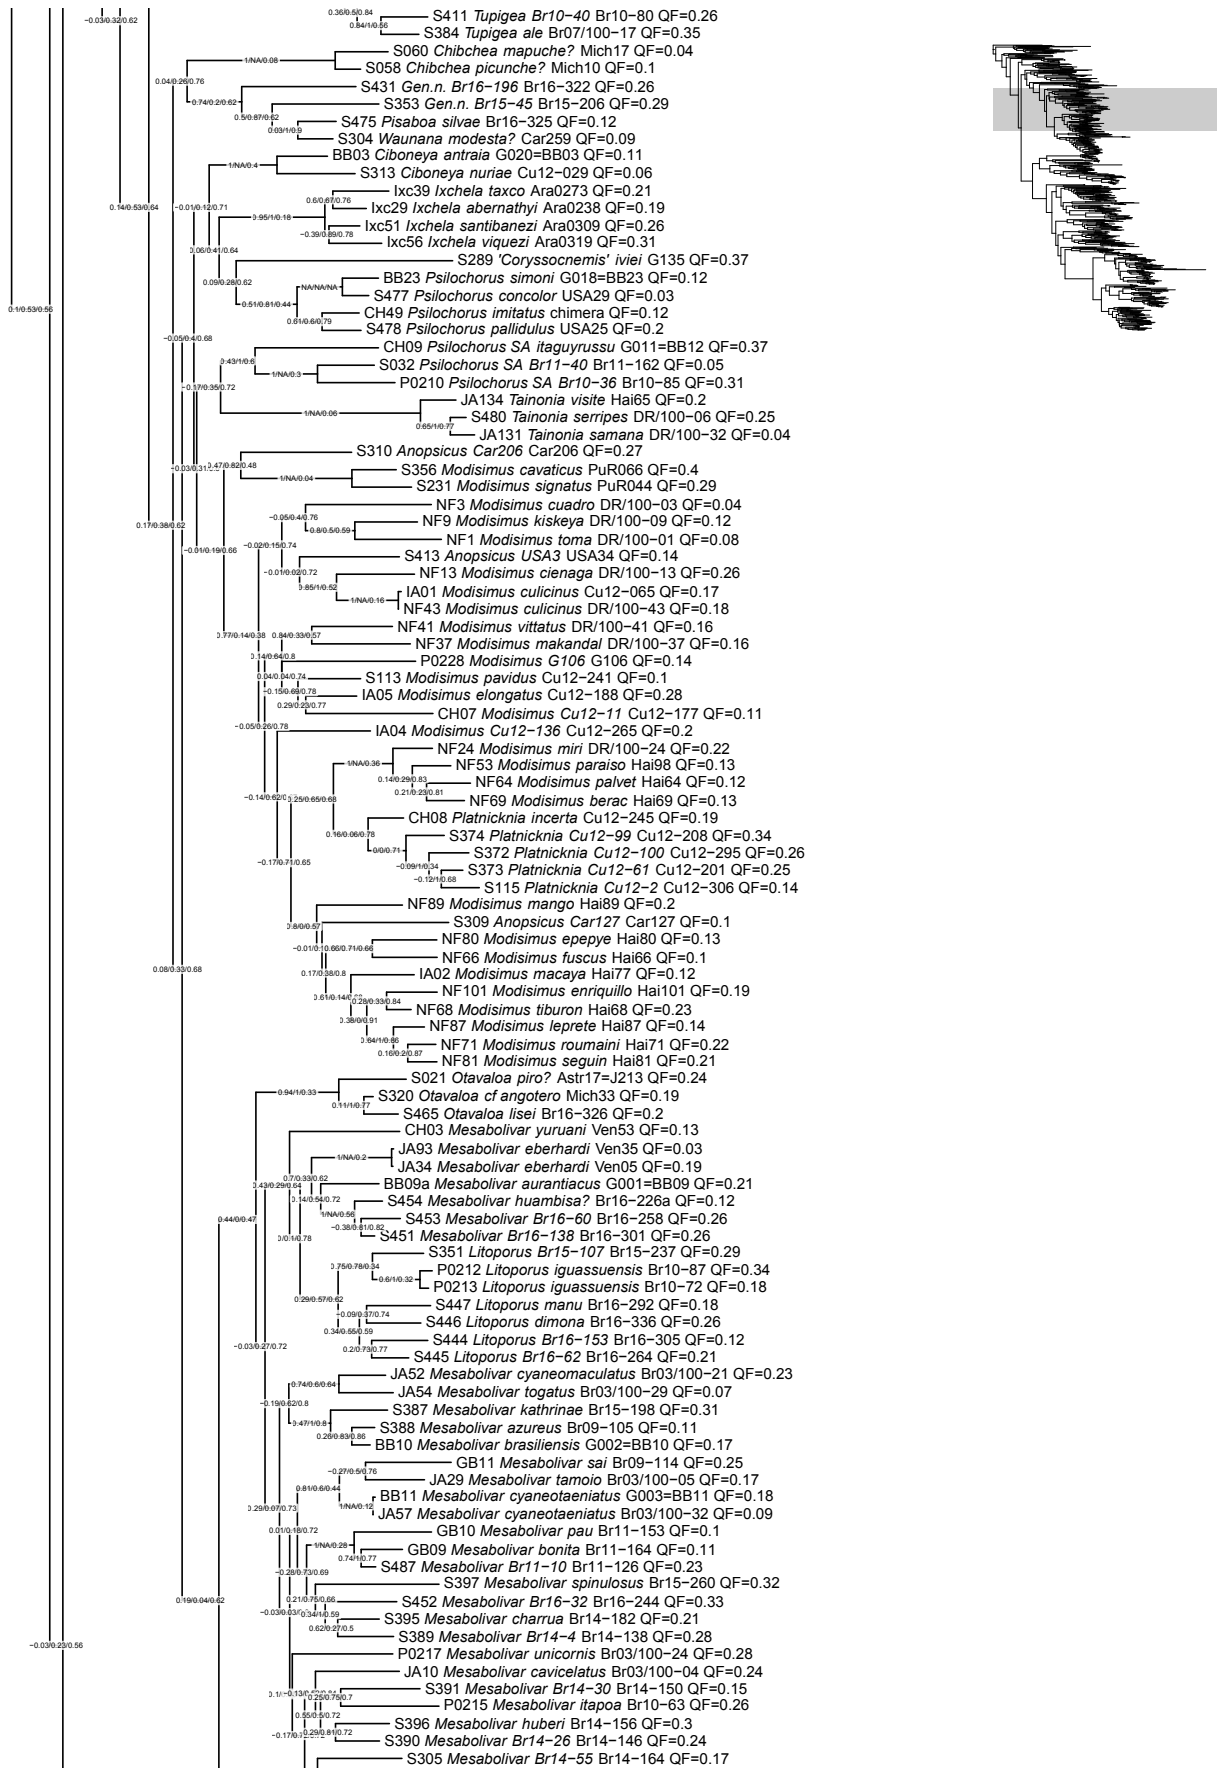

Figure S4 (b). Caption on page 16.

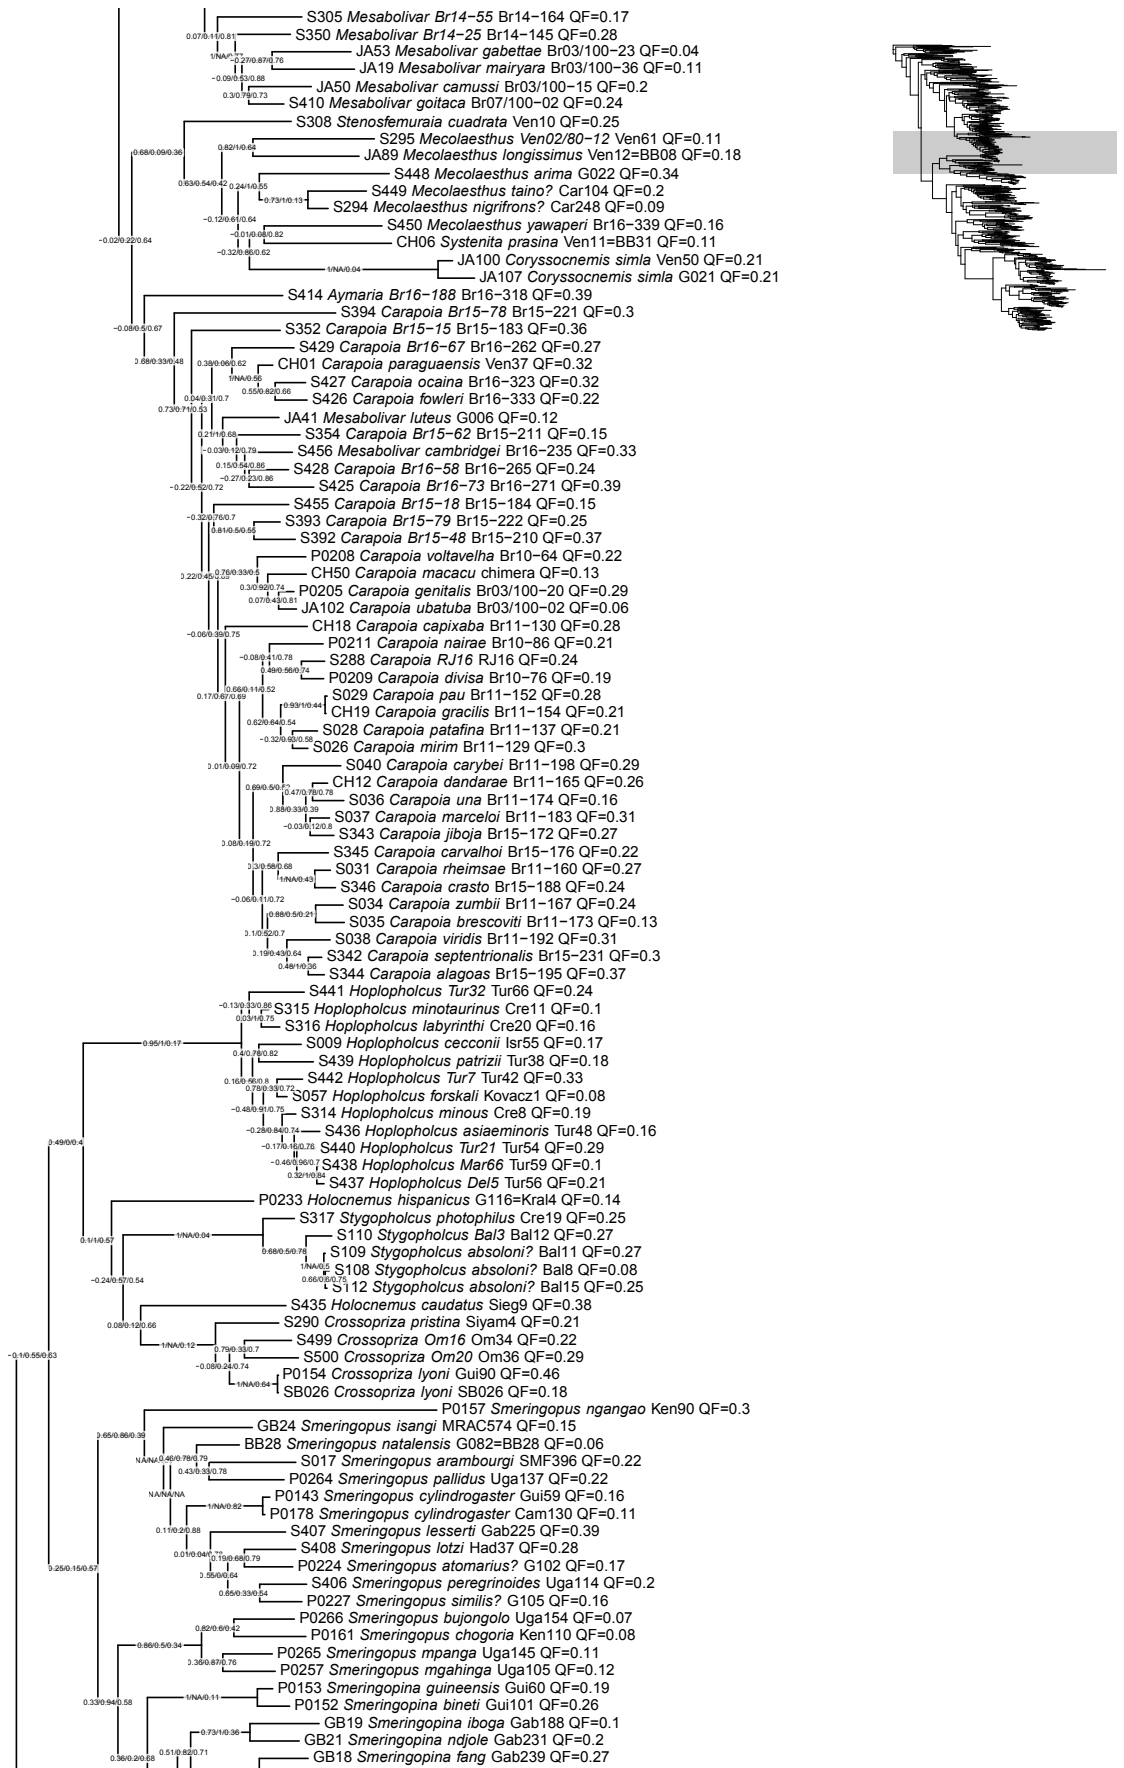

Figure S4 (c). Caption on page 16.

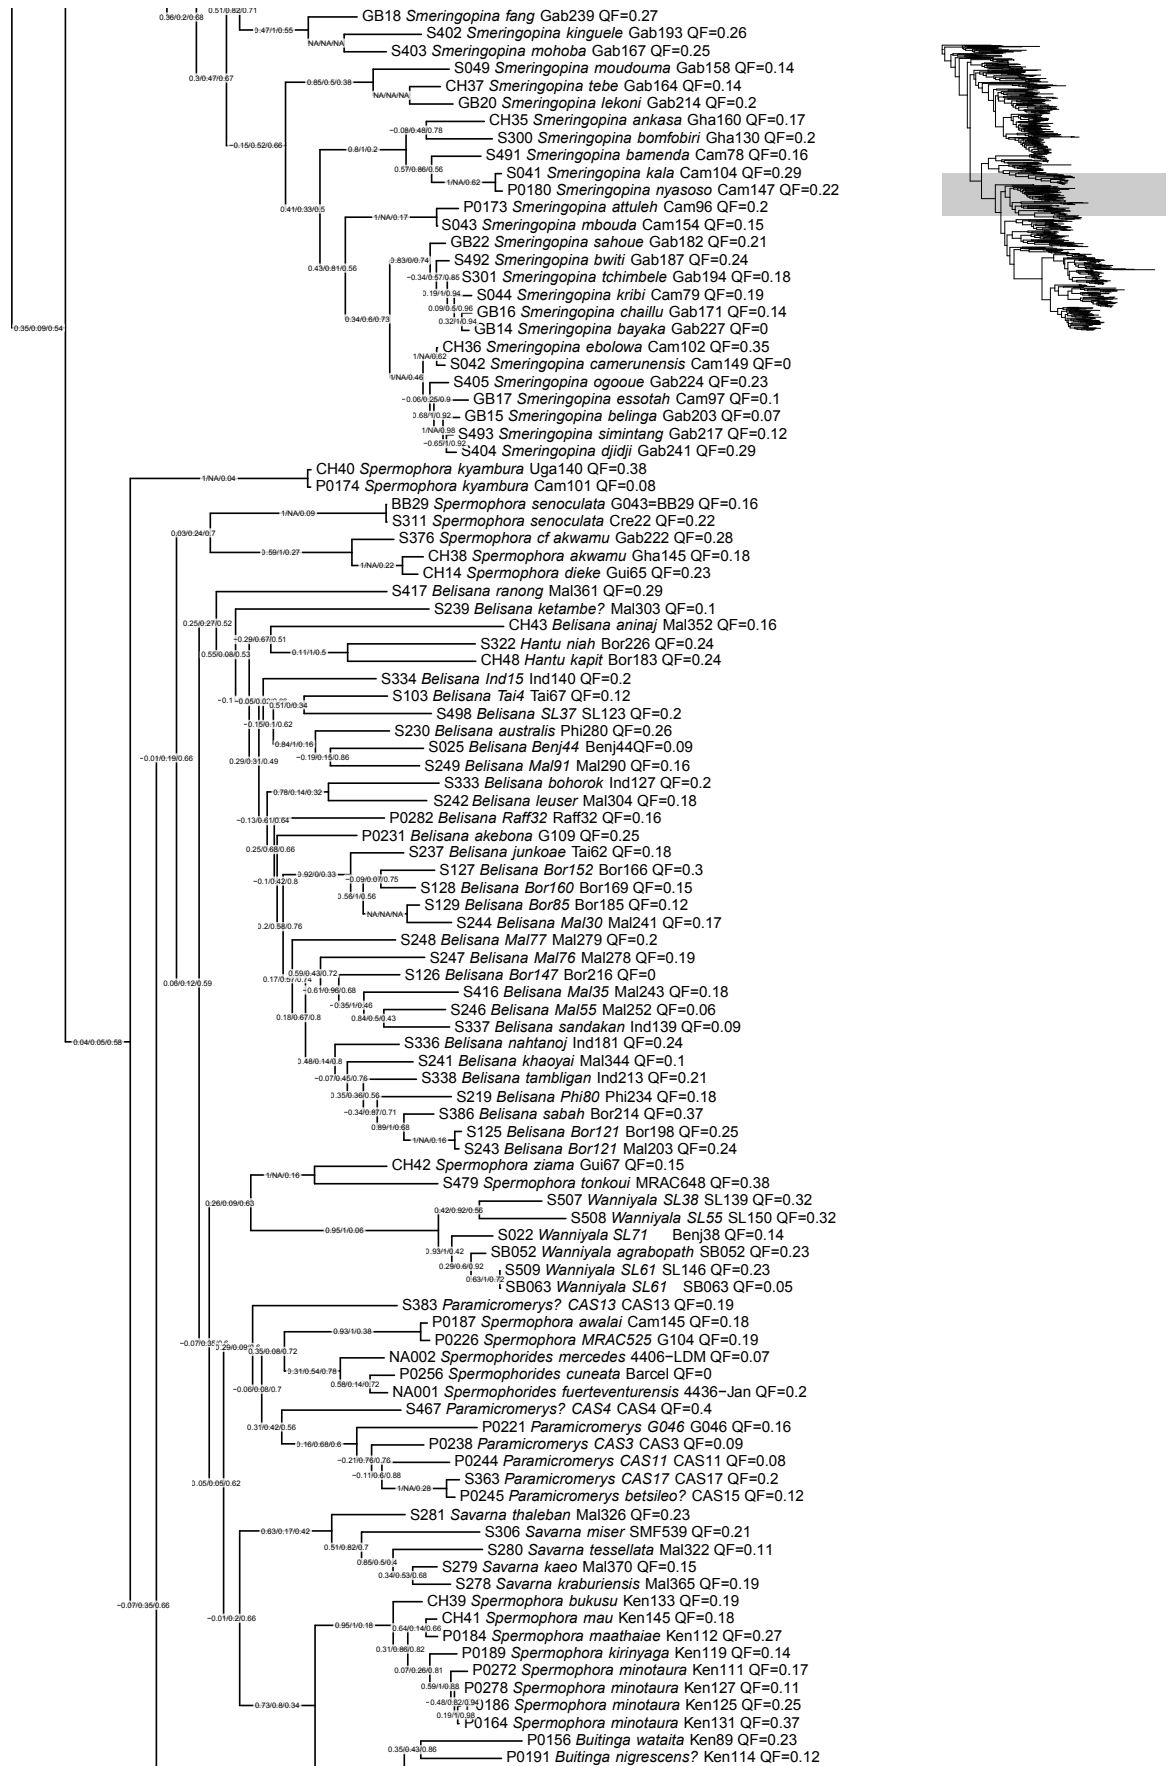

Figure S4 (d). Caption on page 16.

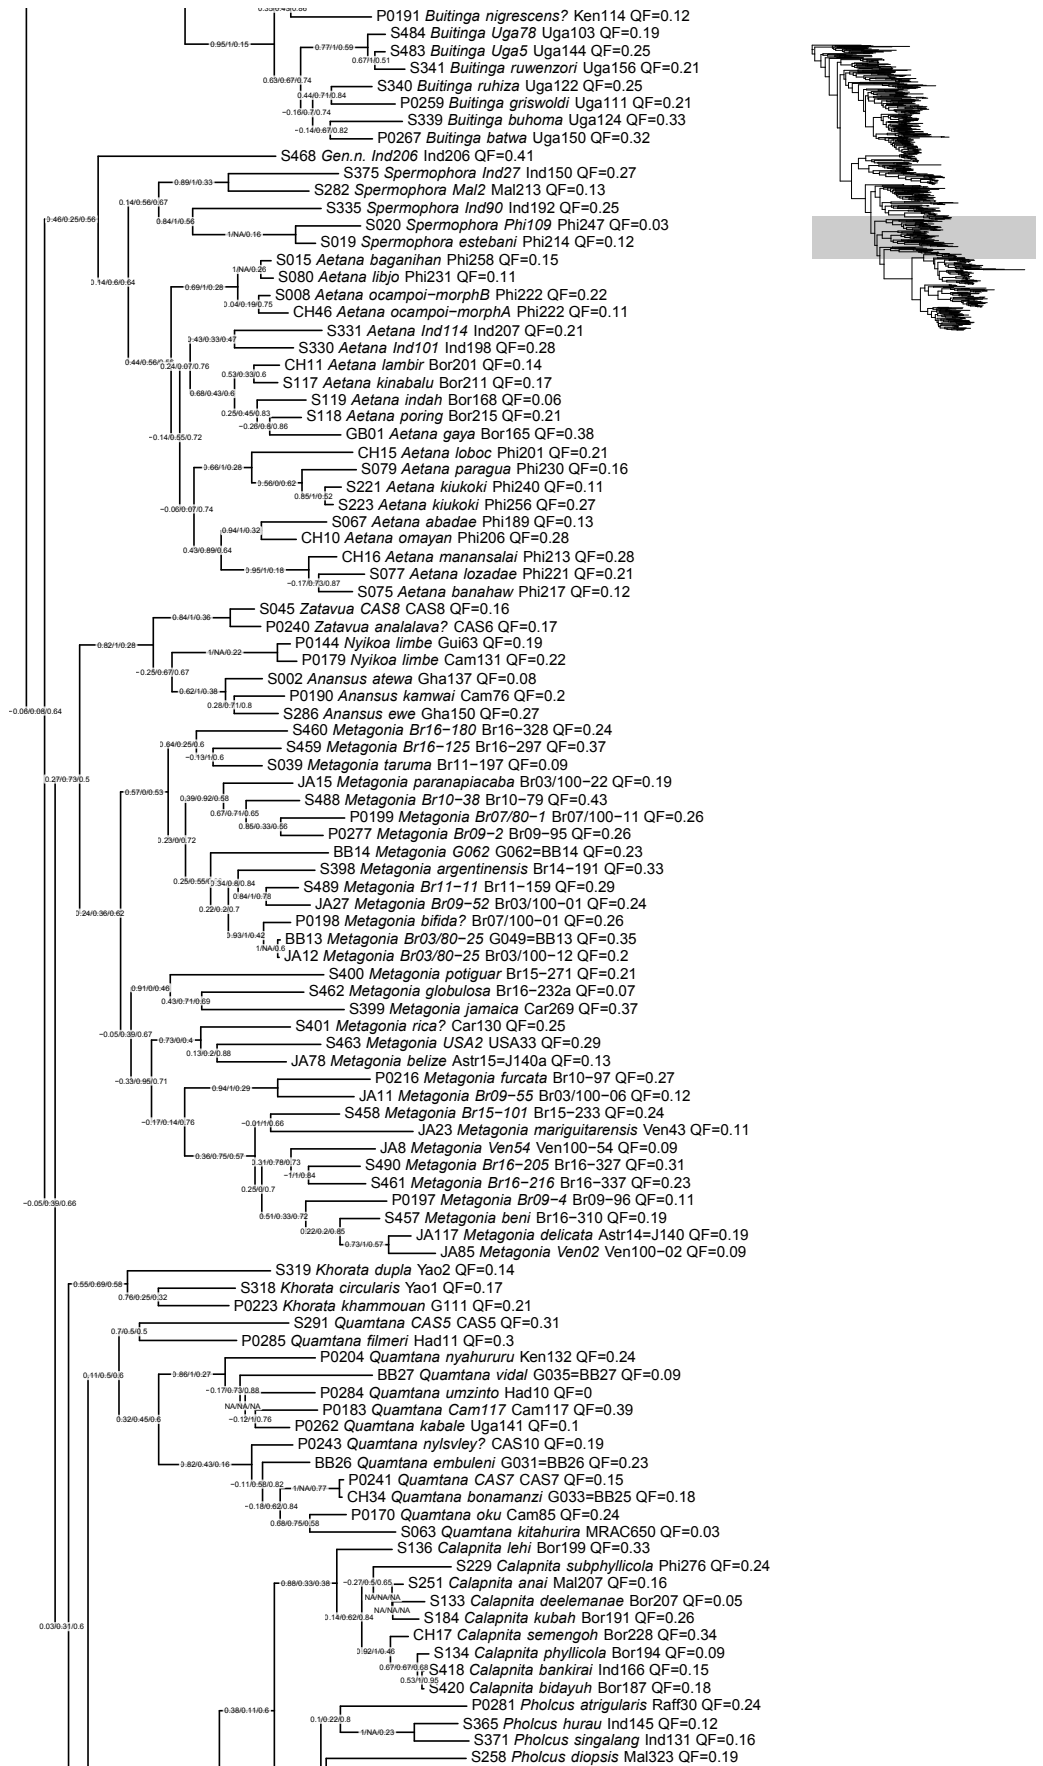

Figure S4 (e). Caption on page 16.

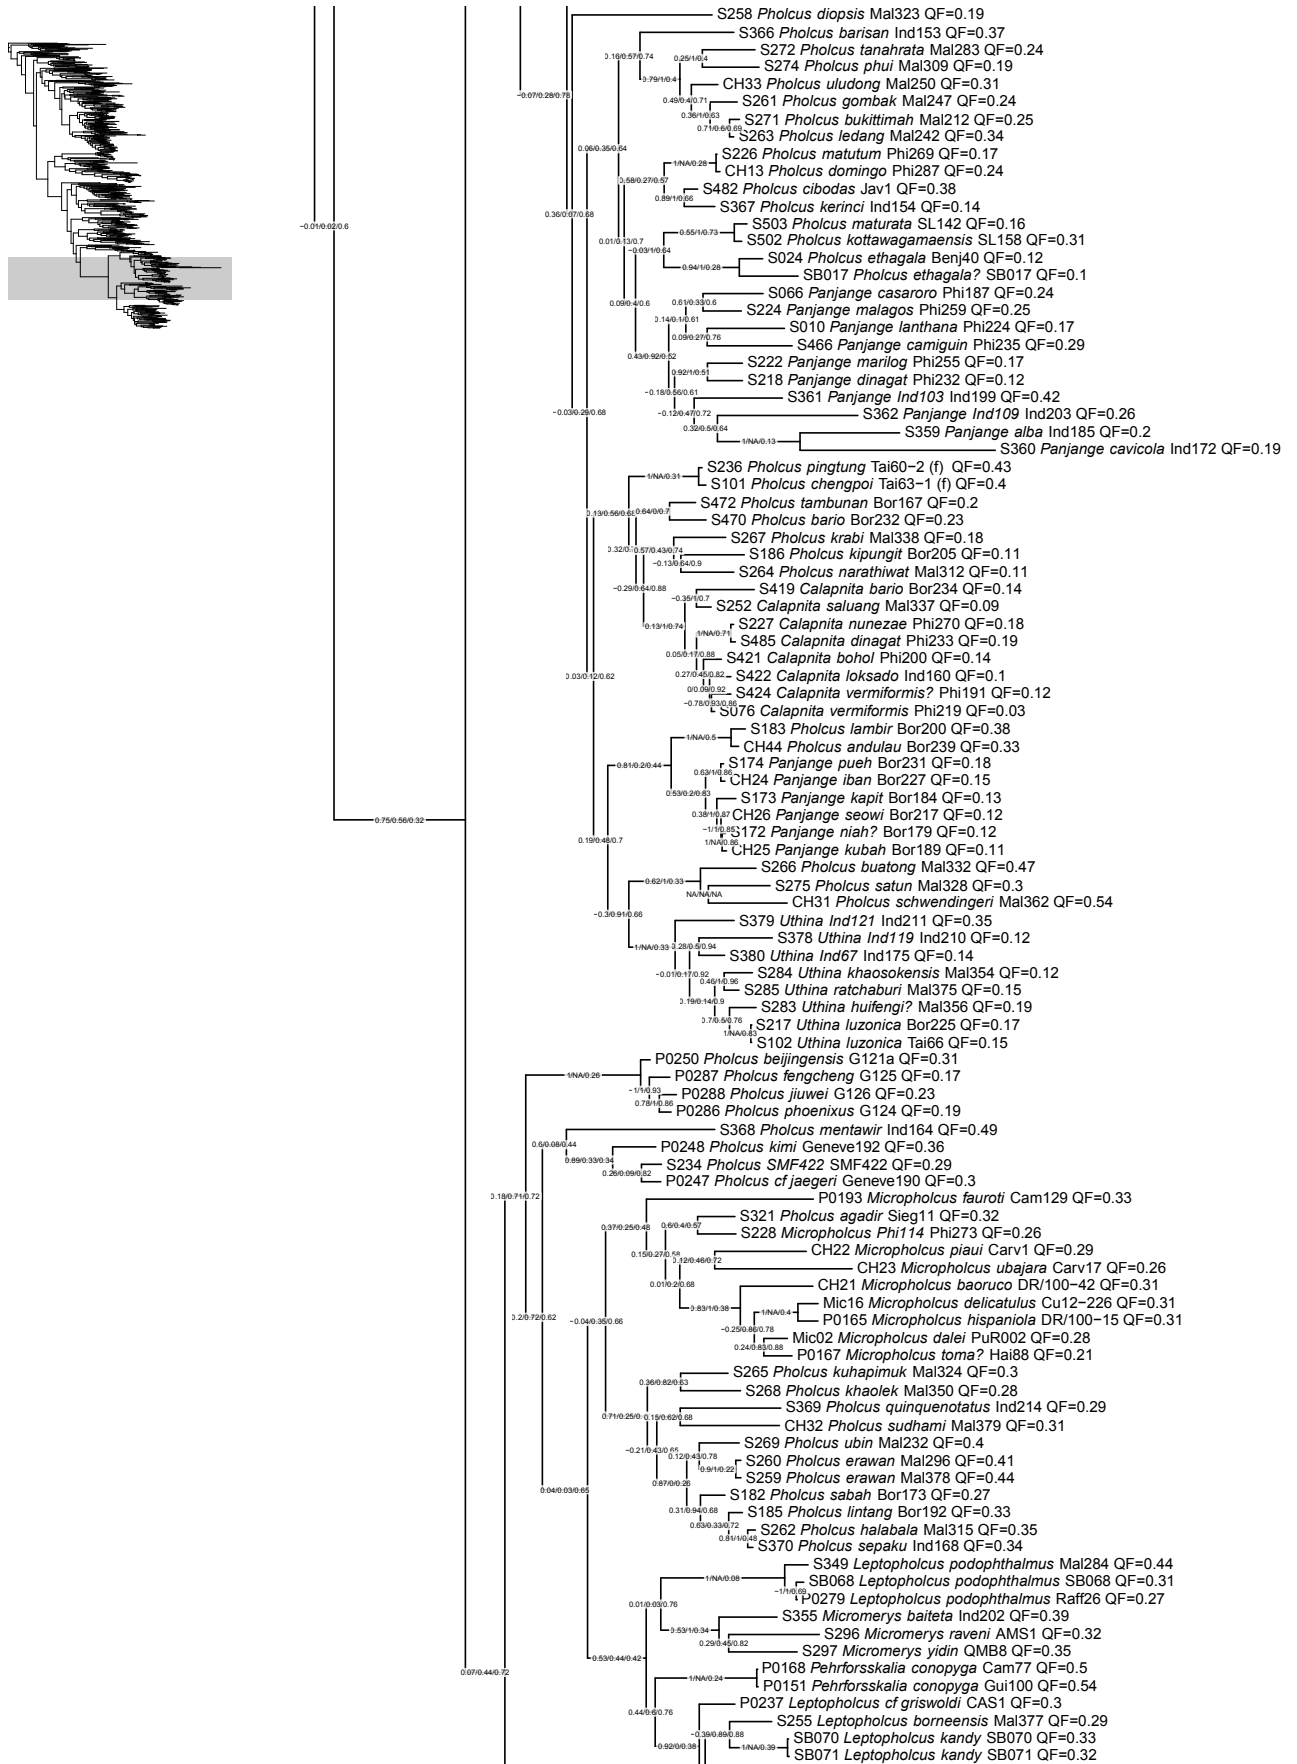

Figure S4 (f). Caption on page 16.

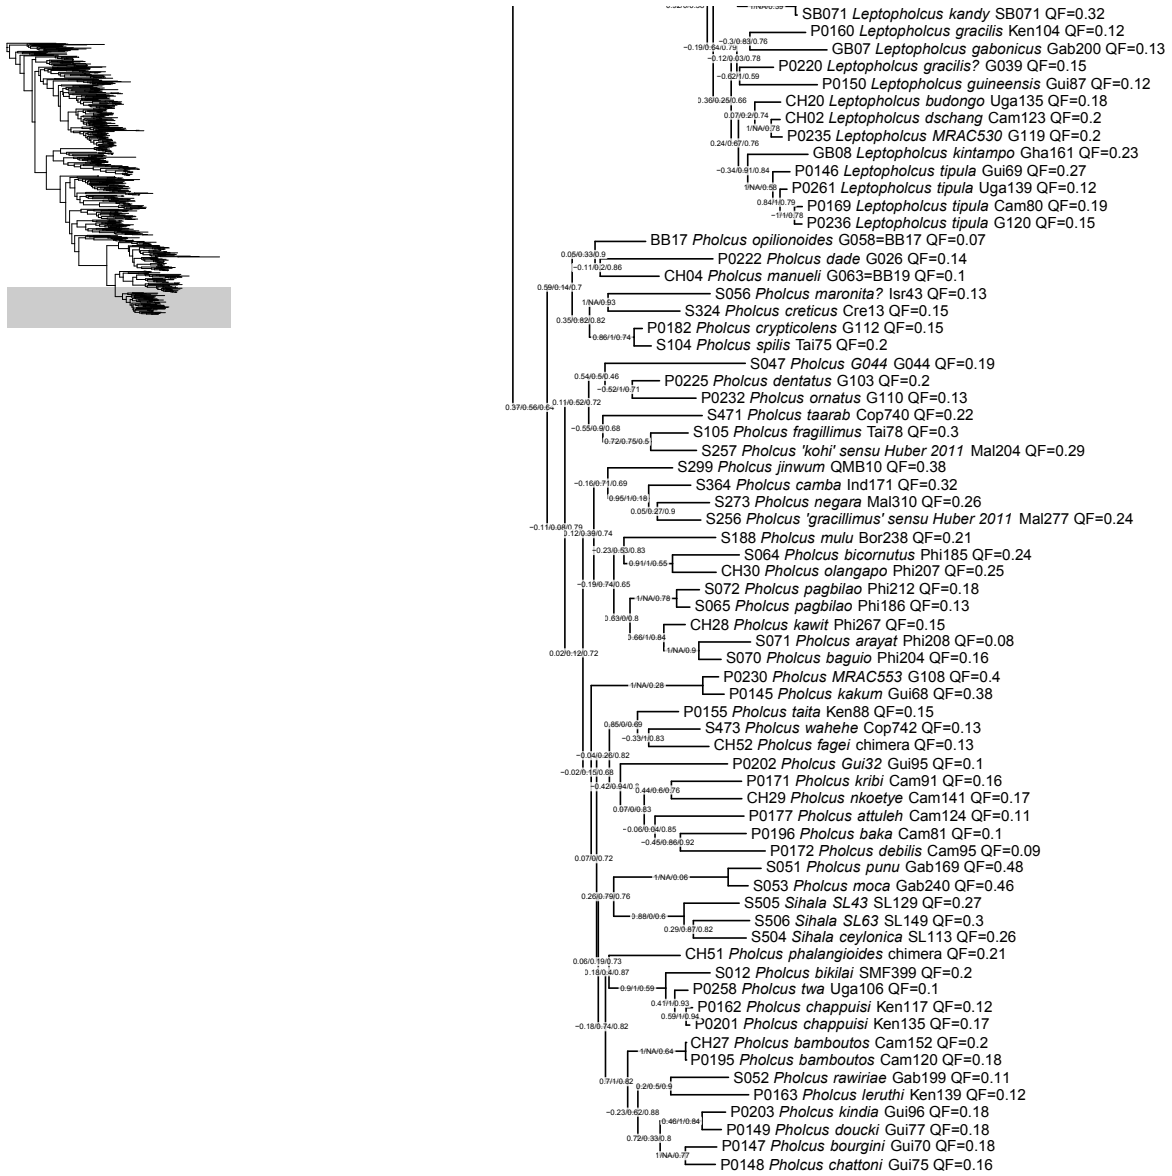

**Figure S4 (g).** Best maximum likelihood tree found by RAxML for the complete sampling. Branch support values are quartetsampling scores (QC/QD/QU). QF scores are given at tips. Tip labels are composed of the specimens' code, species name, and collection vial number.



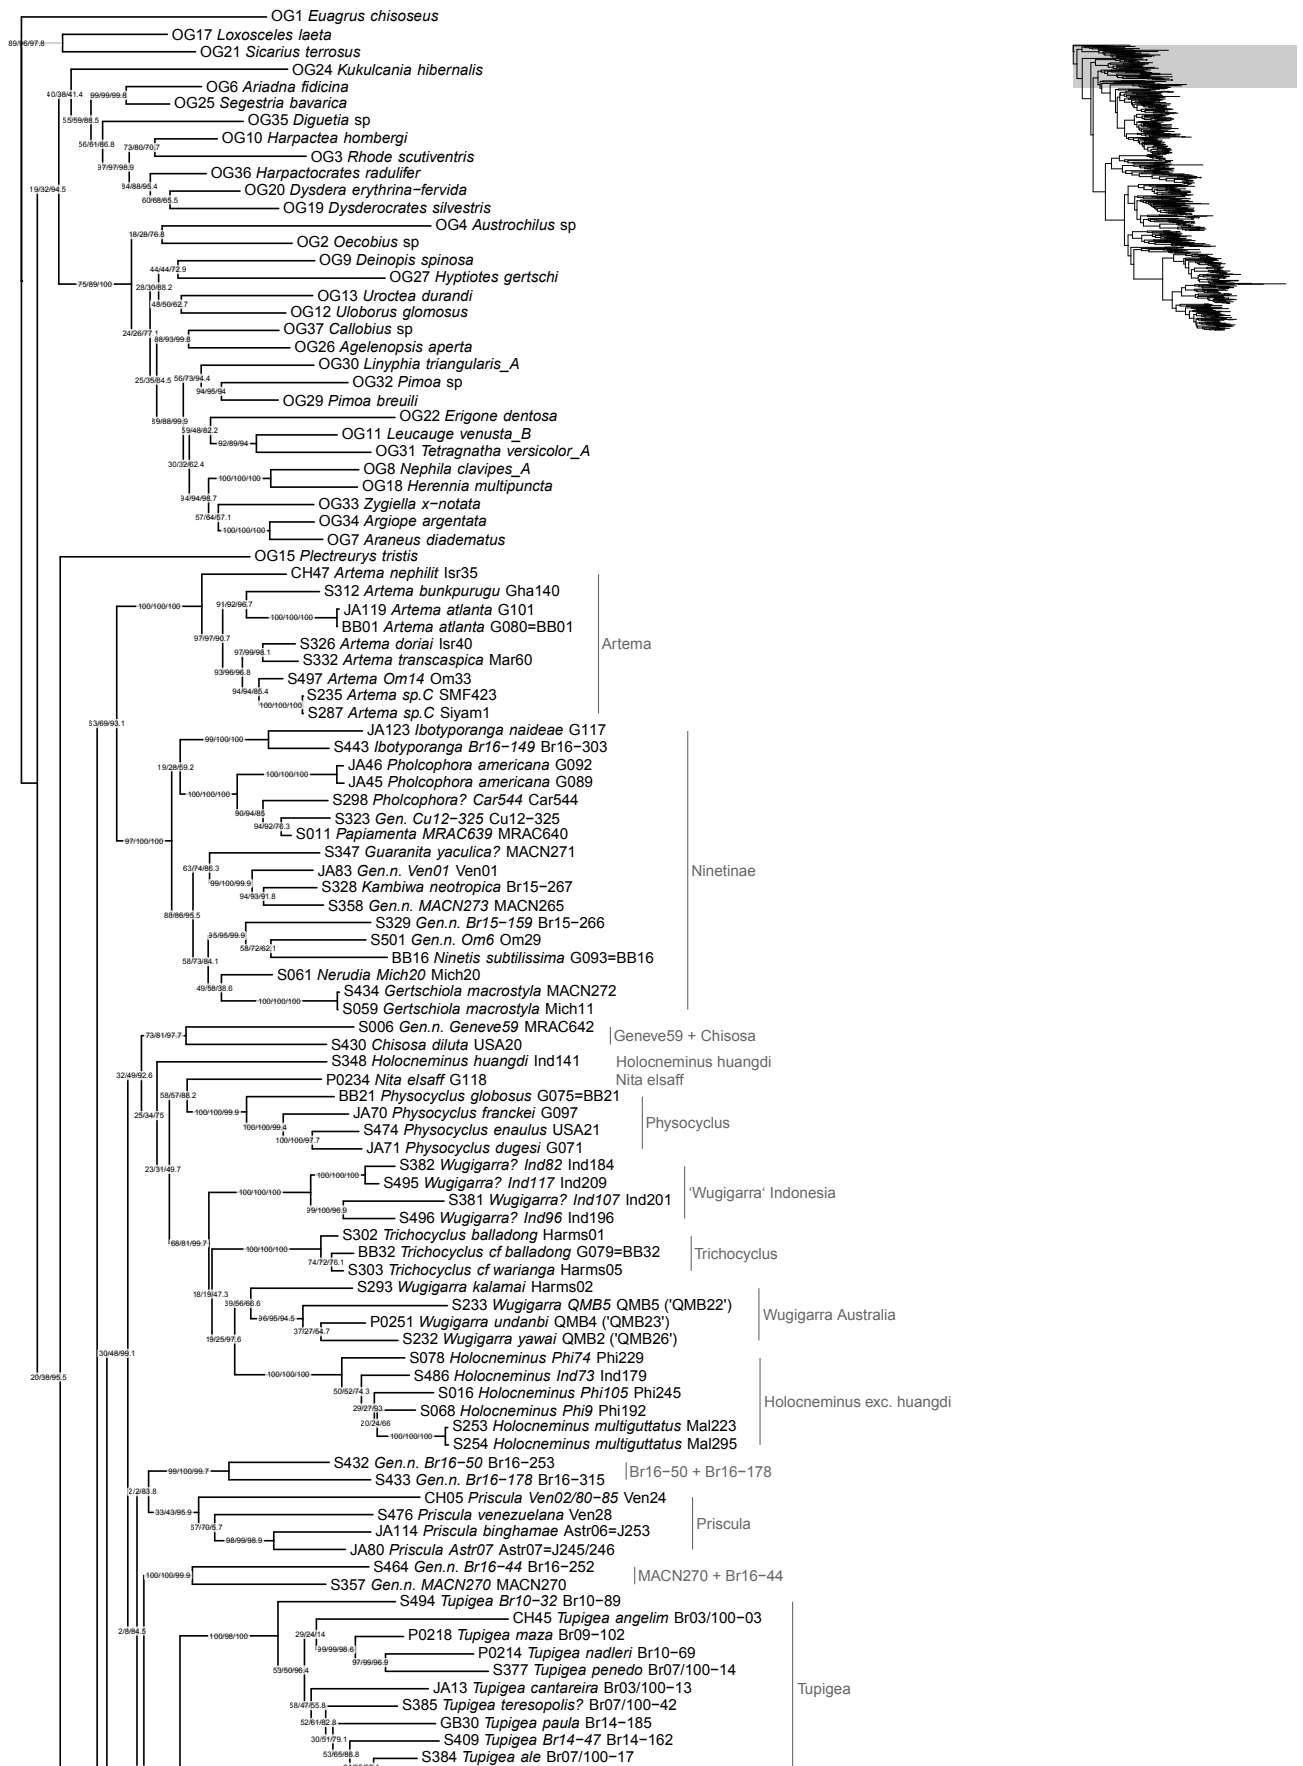

Figure S5 (a). Caption on page 23.

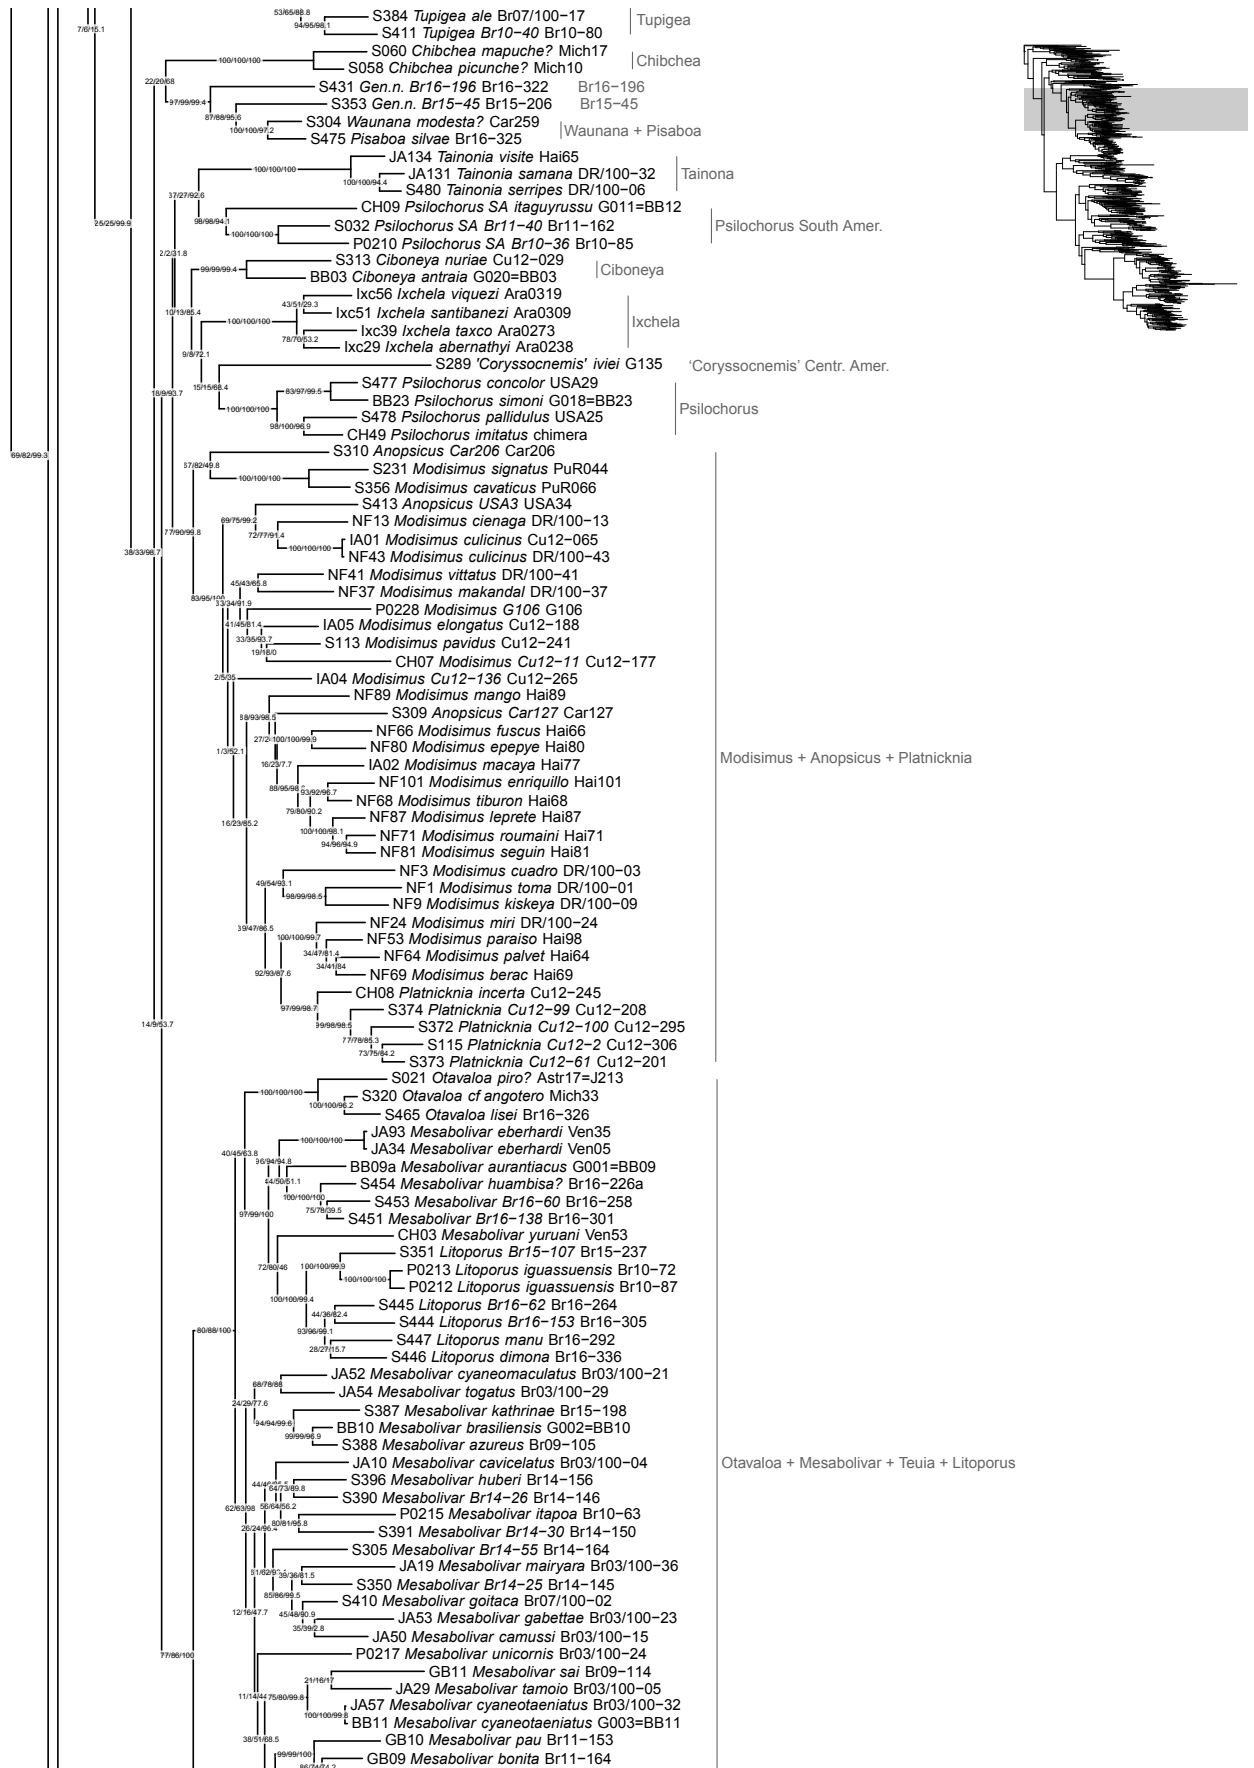

Figure S5 (b). Caption on page 23.

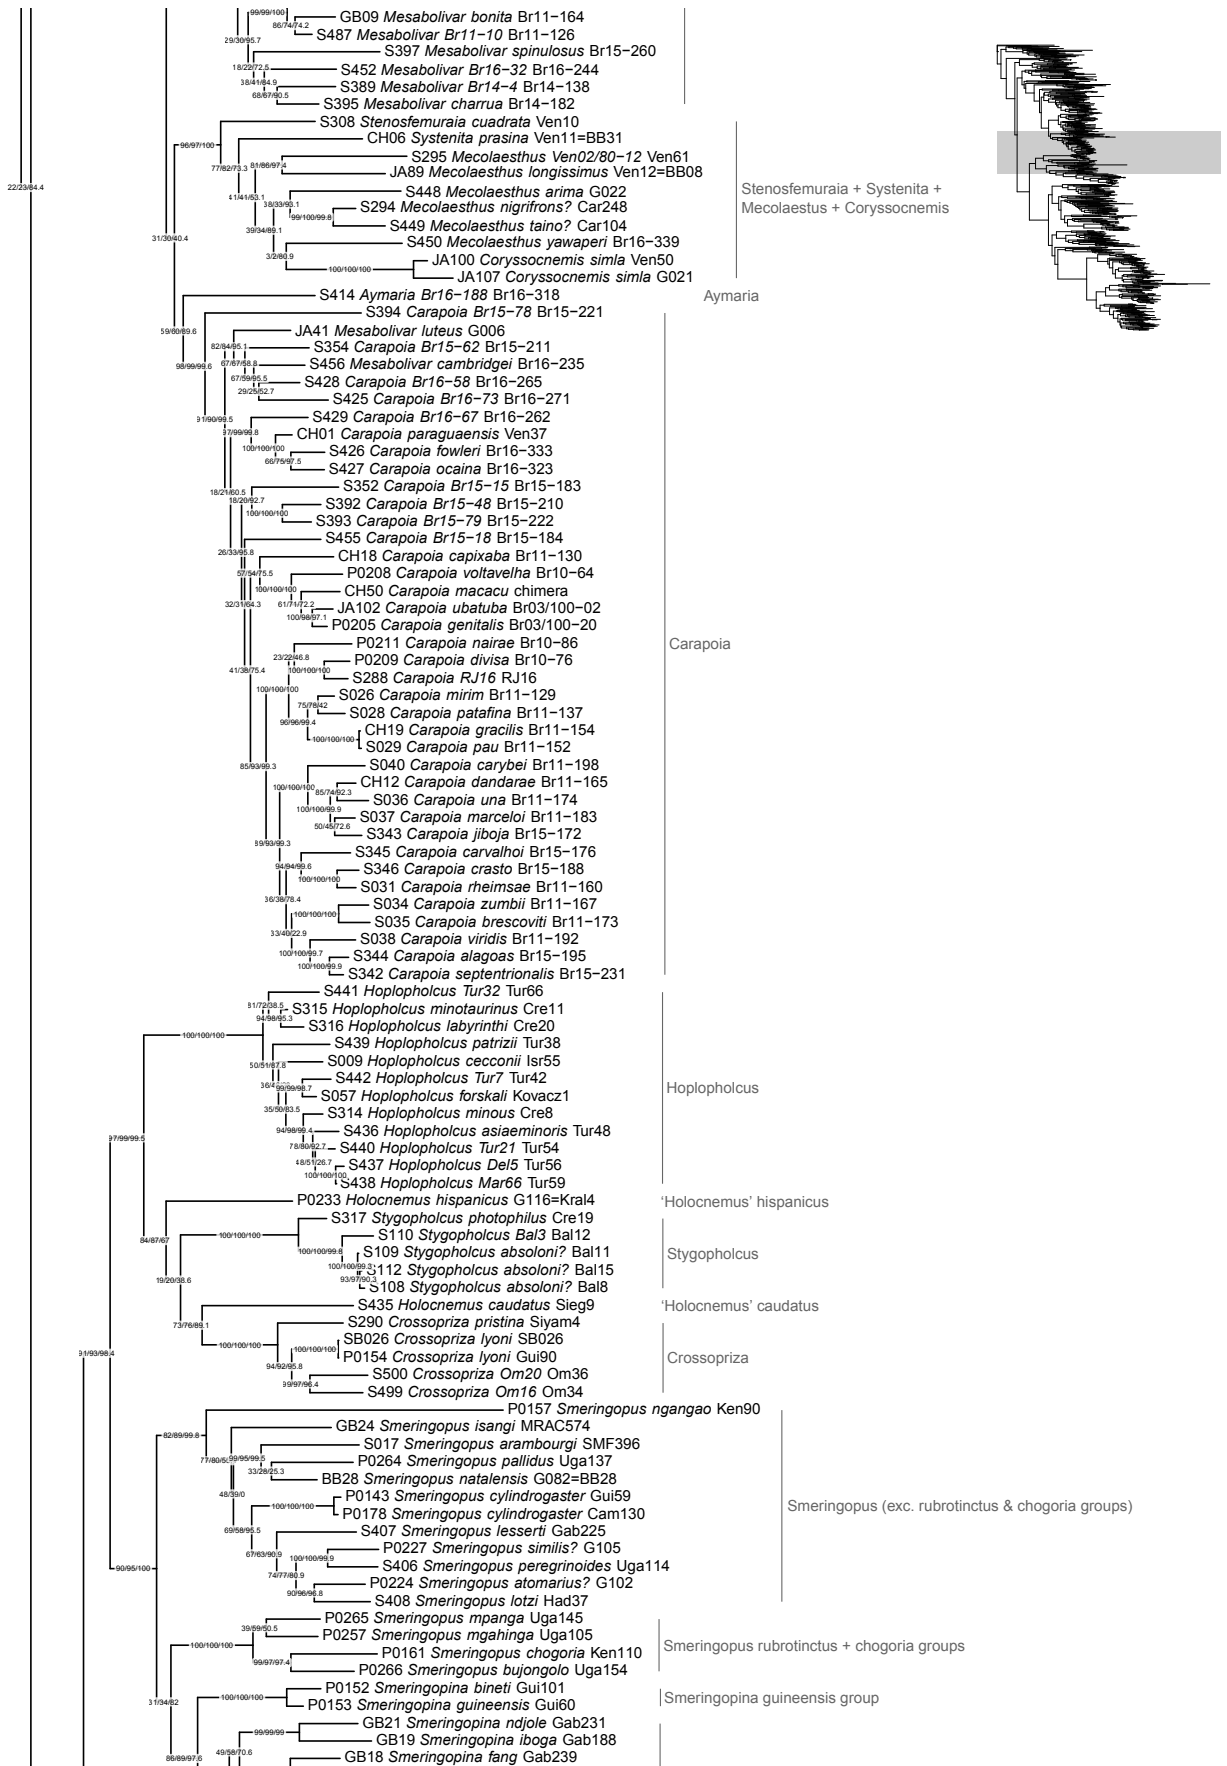

Figure S5 (c). Caption on page 23.

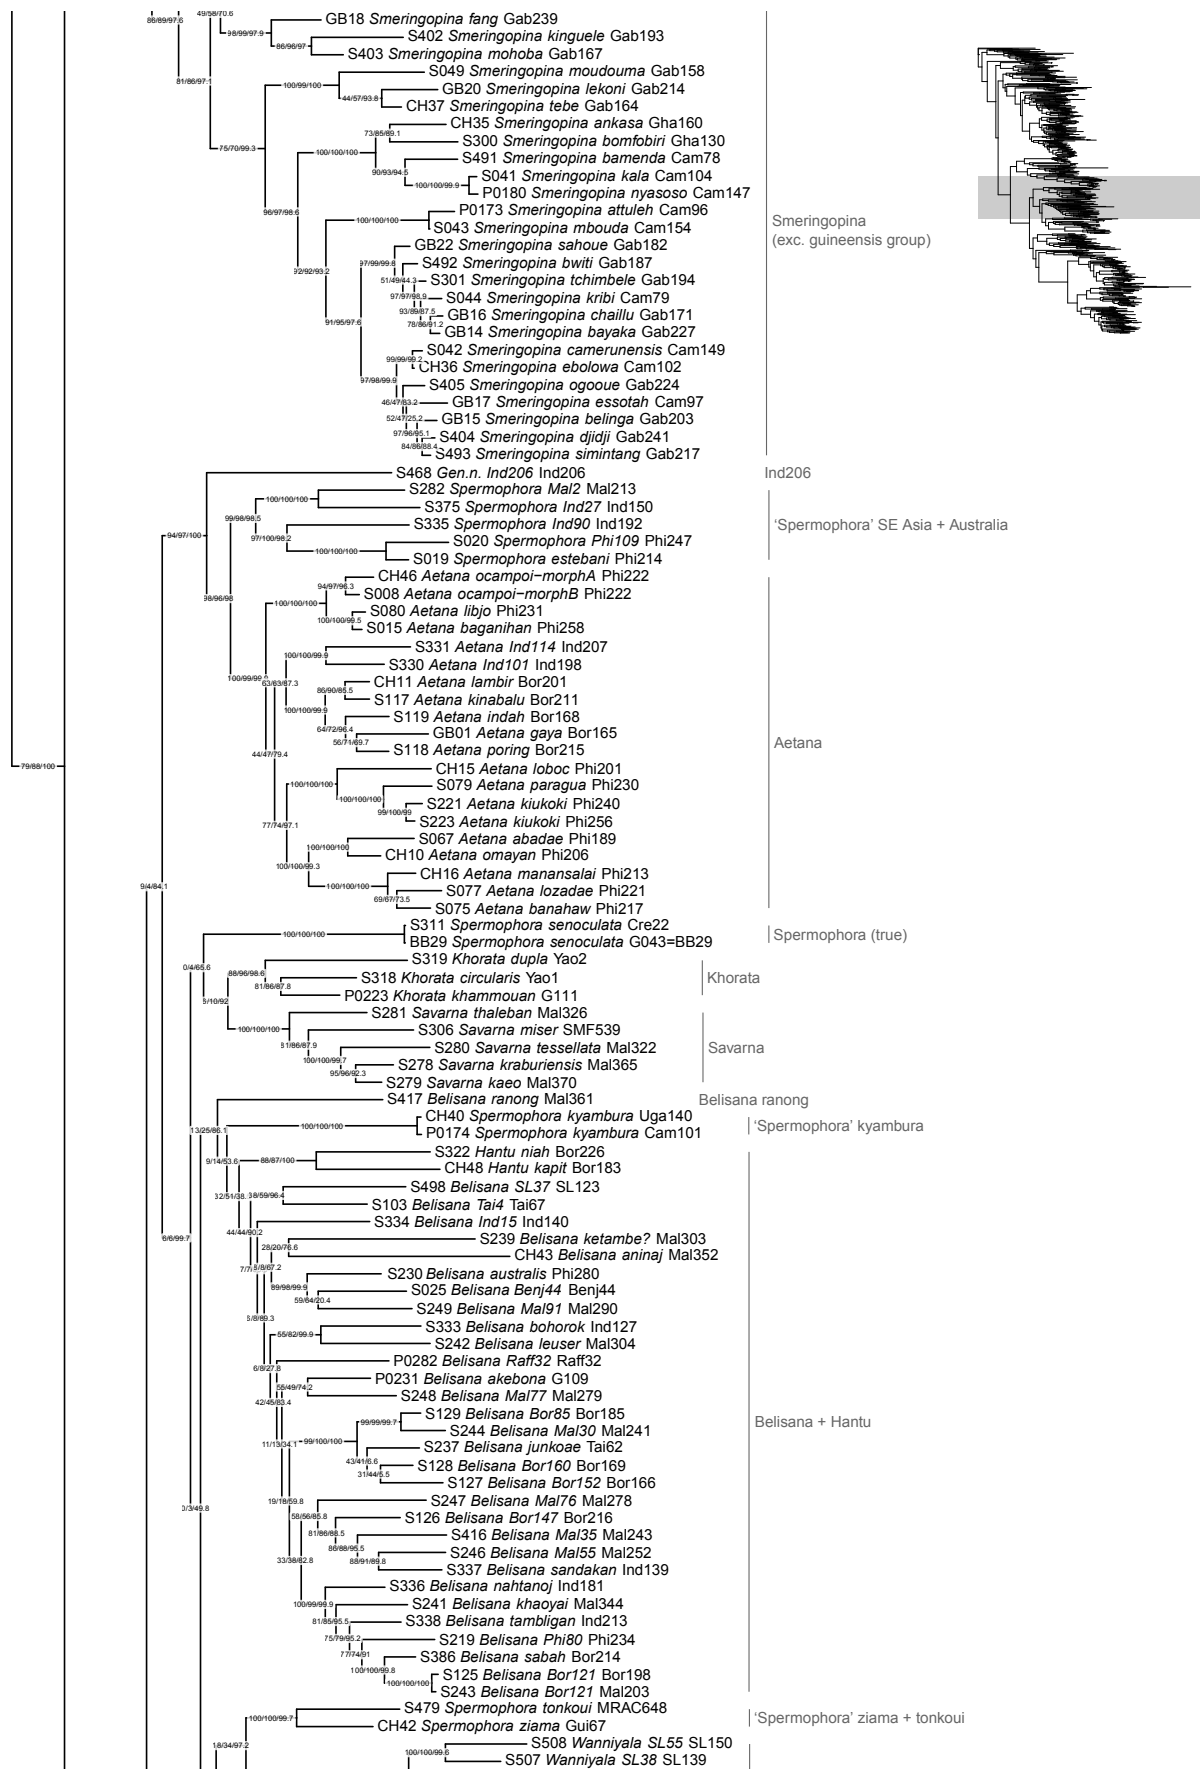

Figure S5 (d). Caption on page 23.

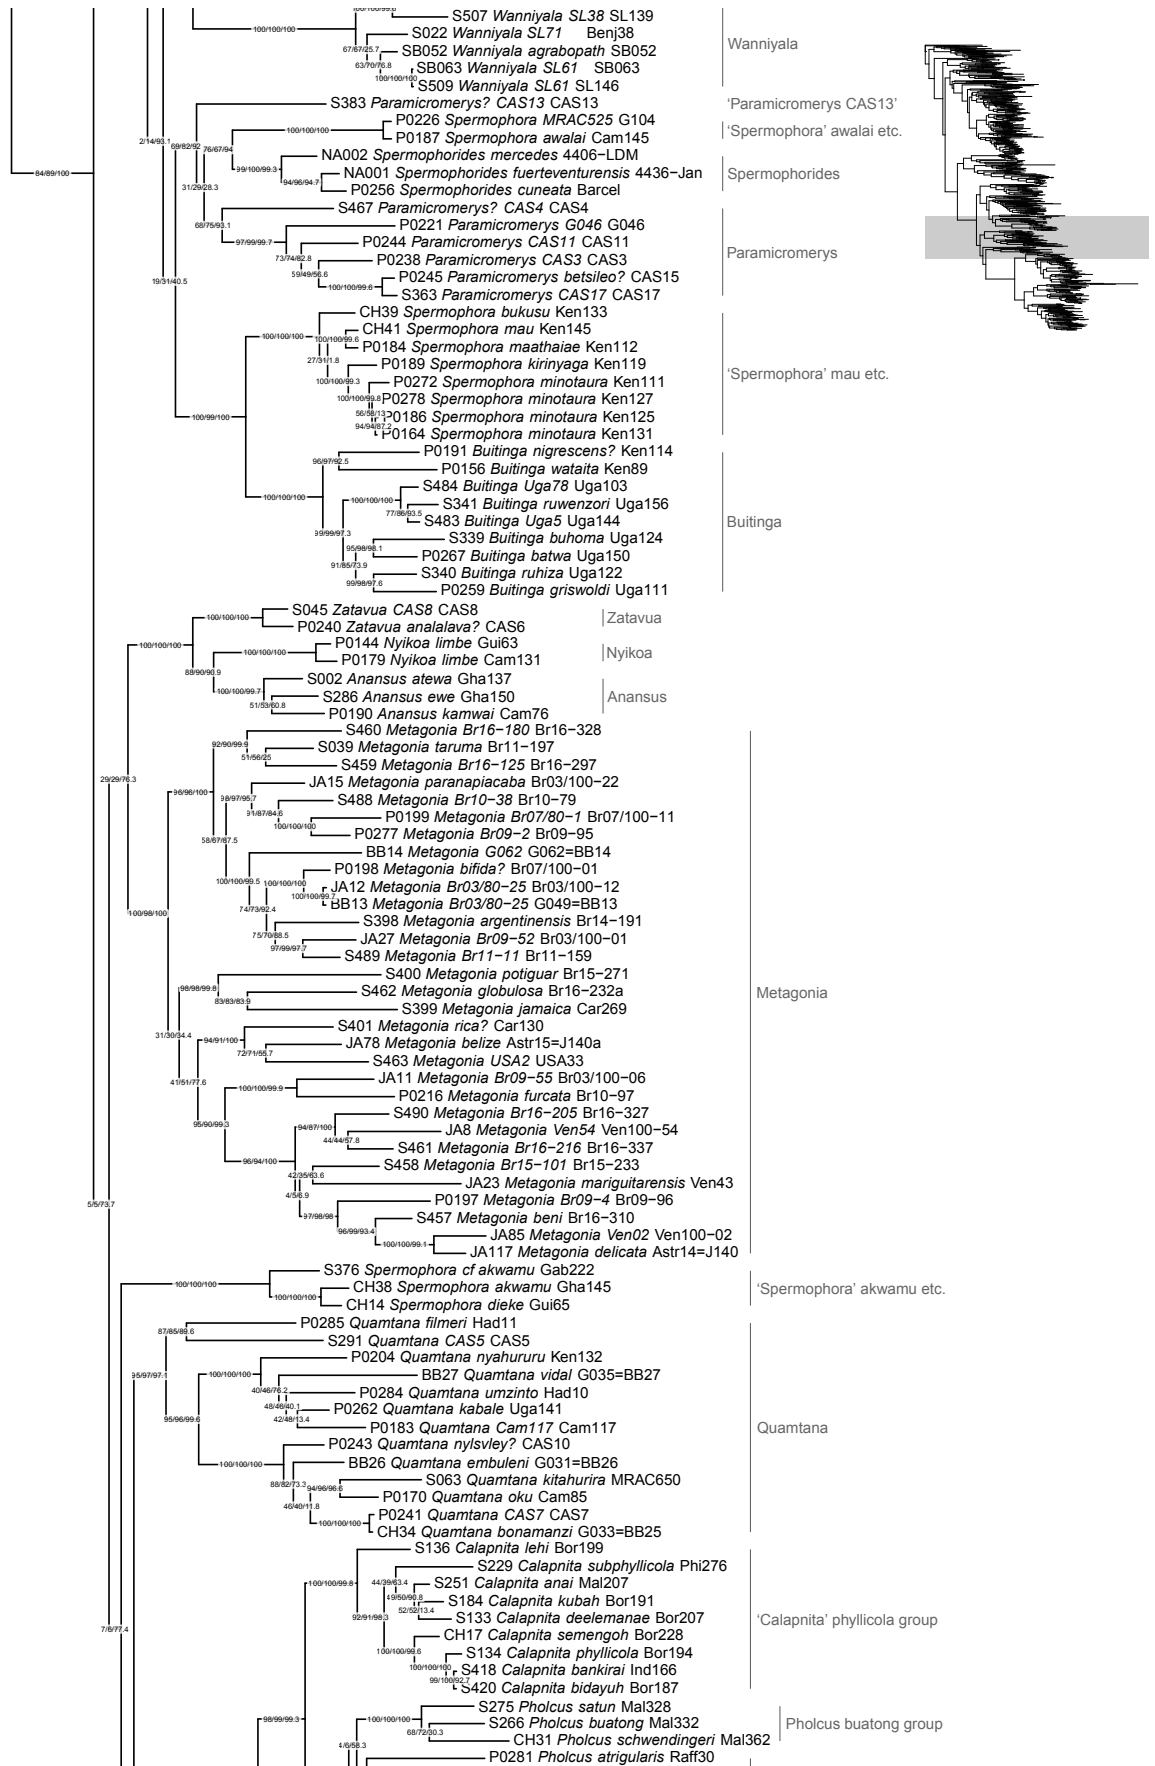

Figure S5 (e). Caption on page 23.

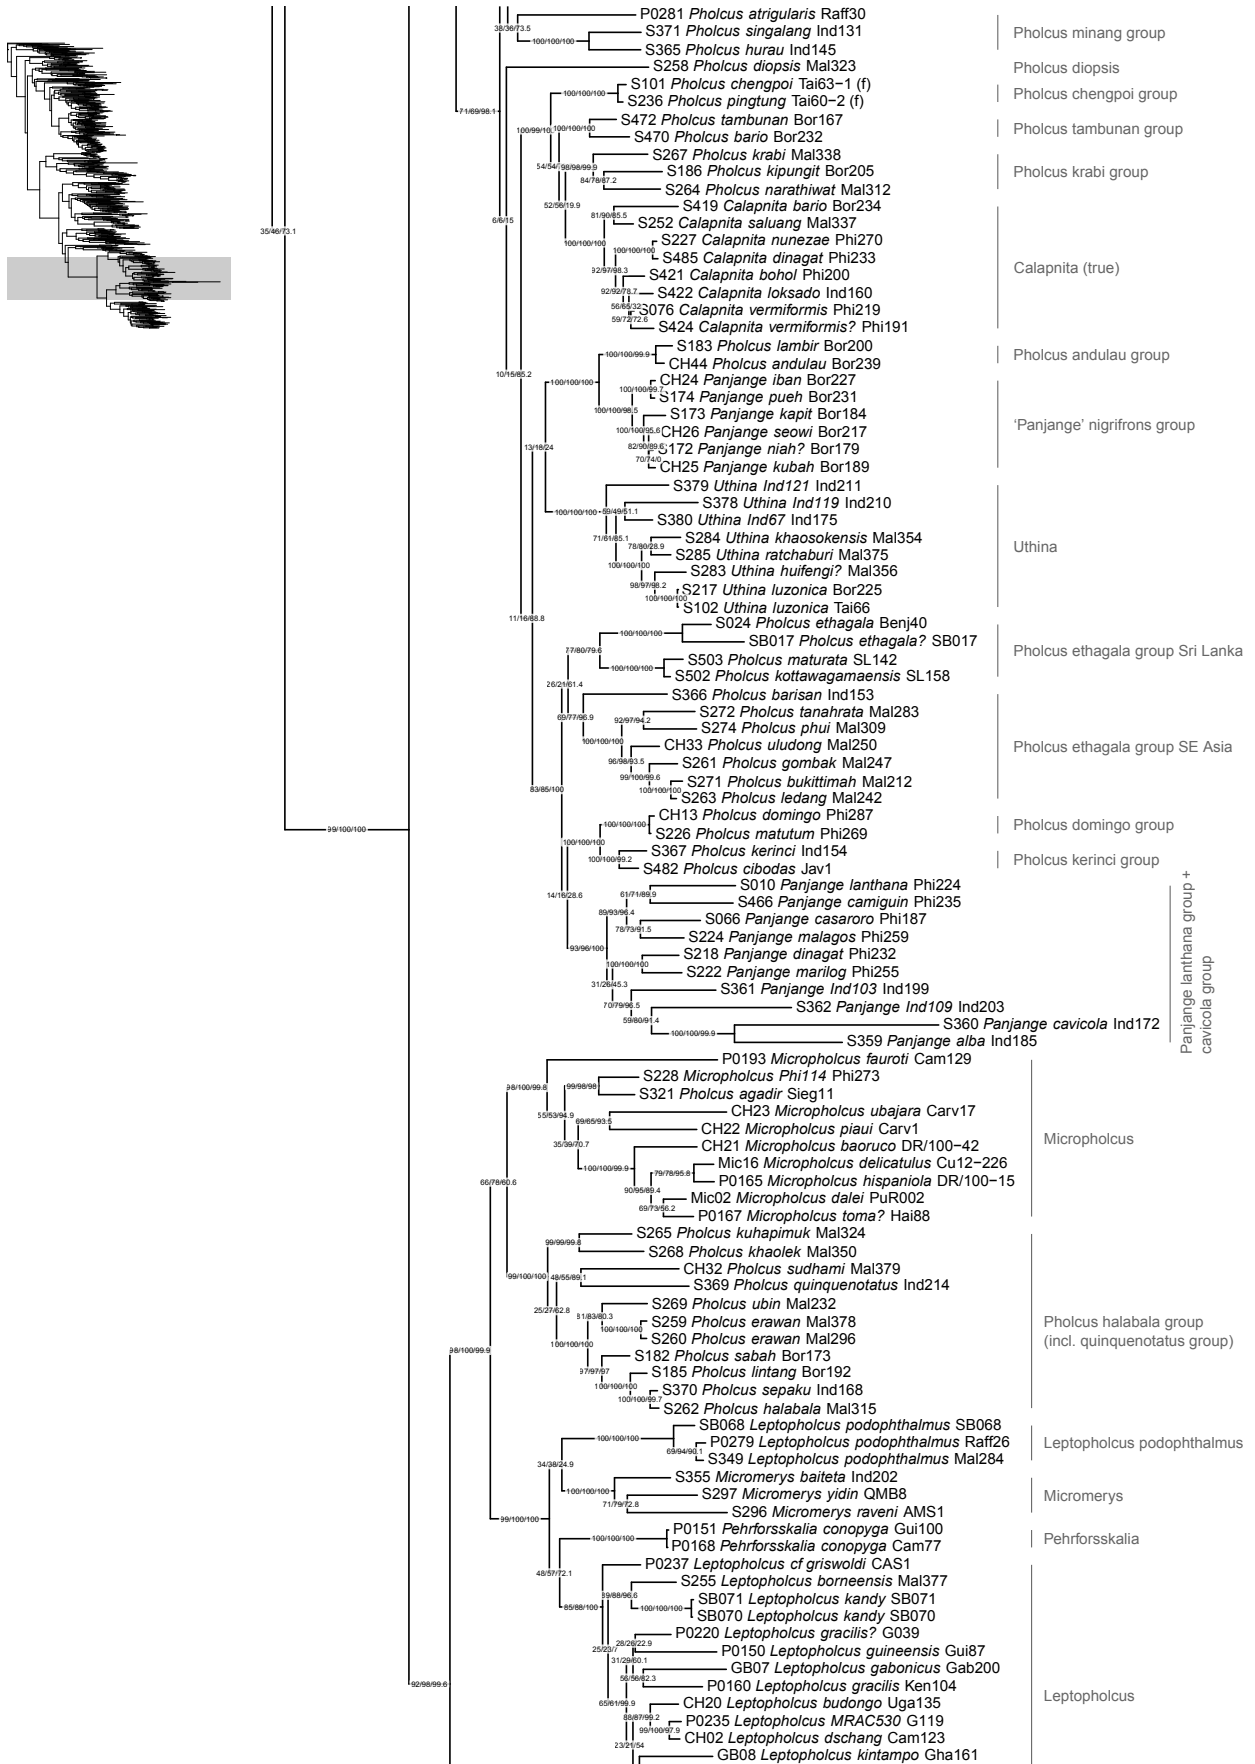

Figure S5 (f). Caption on page 23.

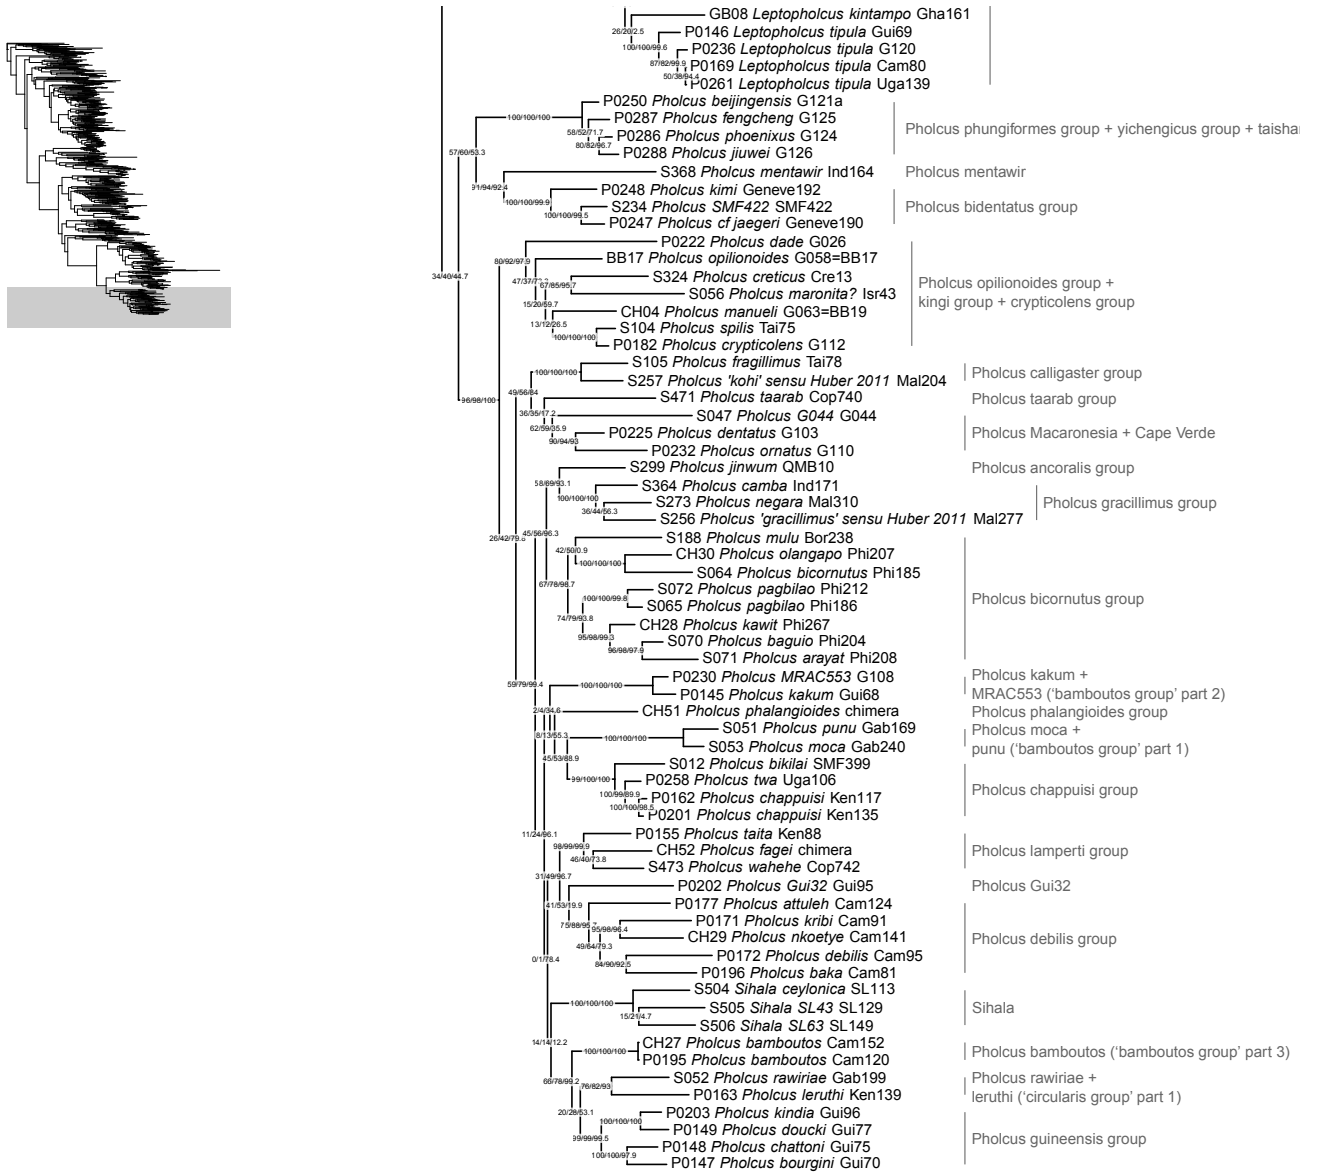

**Figure S5 (g).** Best maximum likelihood tree found by IQ-TREE for the complete sampling. Branch support values are standard bootstrap, rapid bootstrap and SH-like aLRT values, respectively, separated by a slash. Tip labels are composed of the specimens' code, species name, and collection vial number.

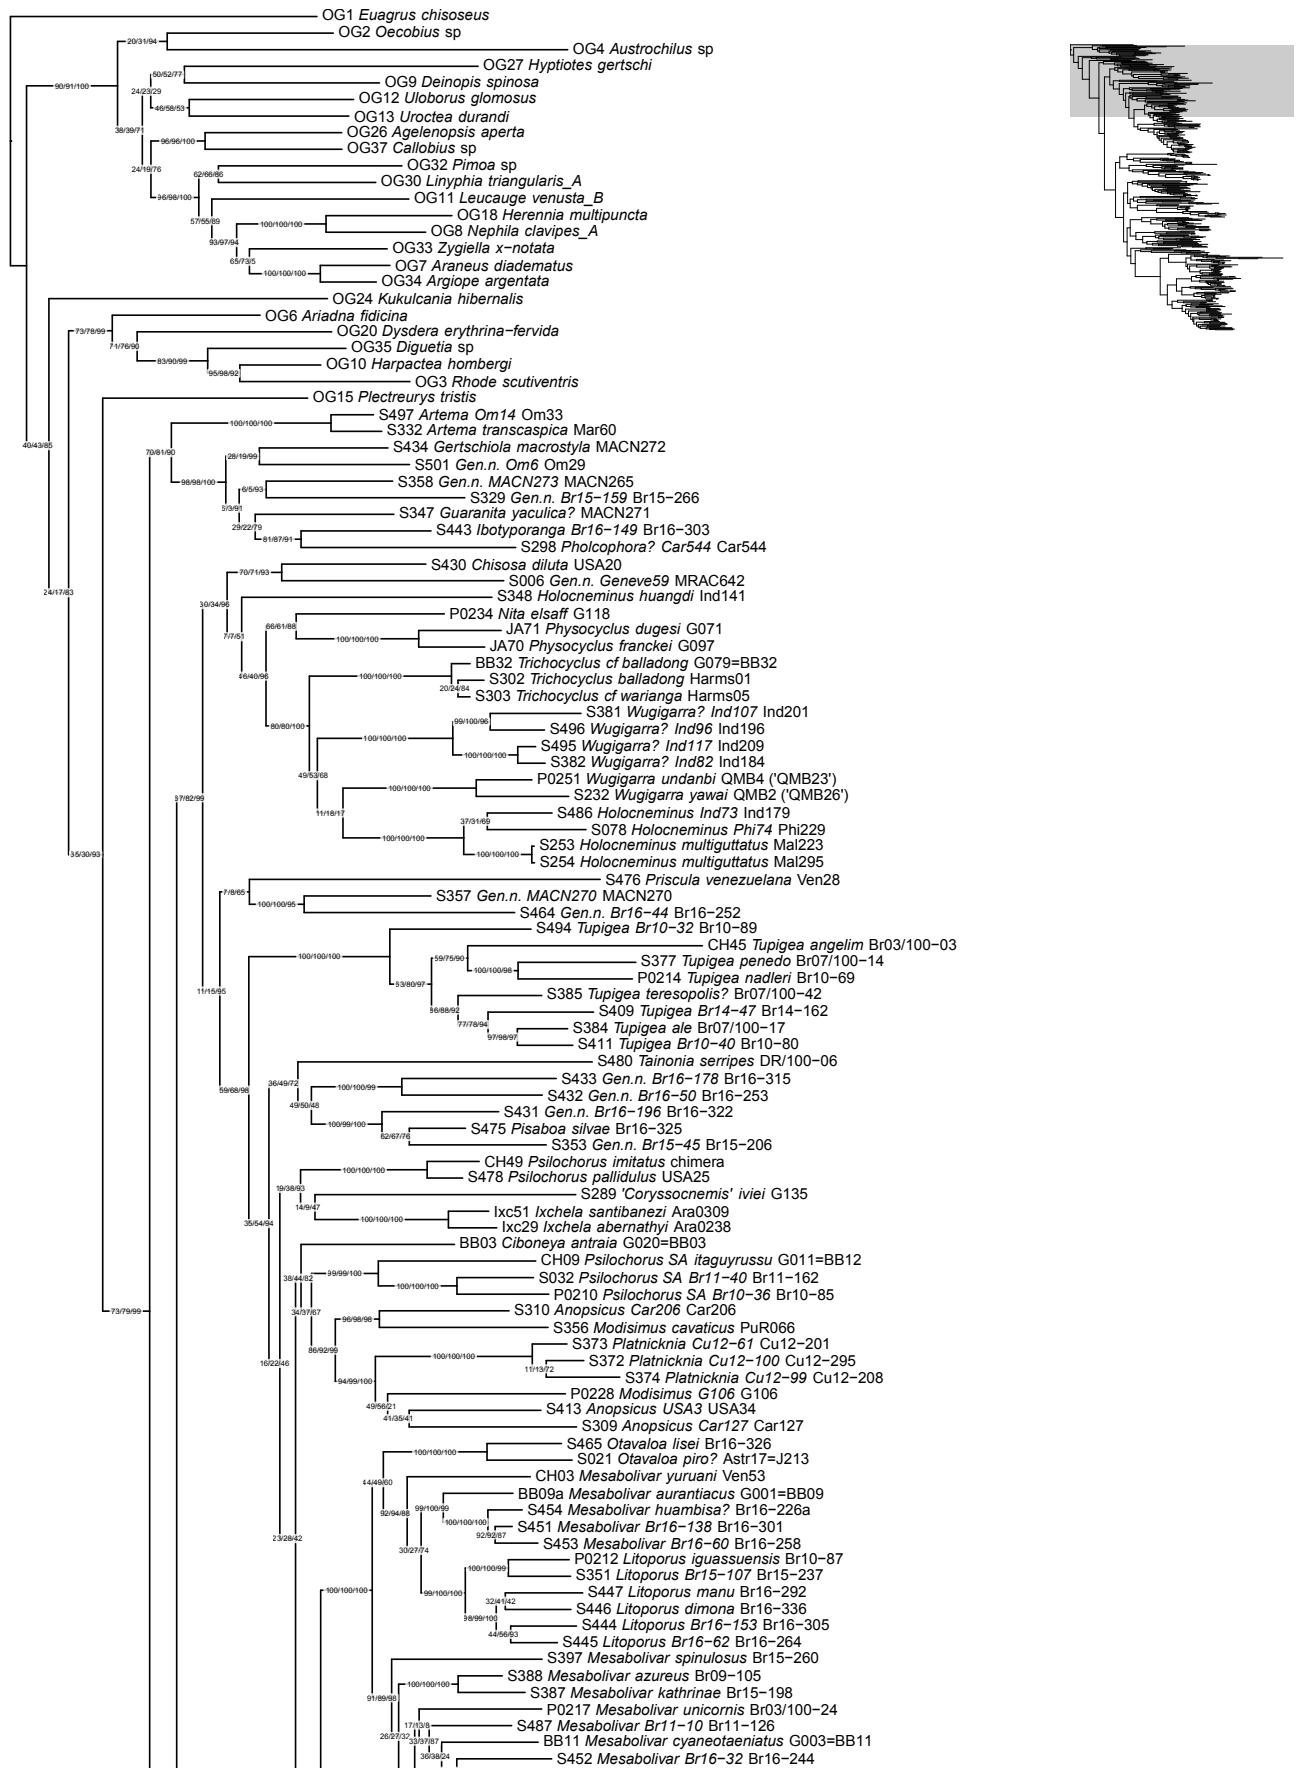

Figure S6 (a). Caption on page 27.



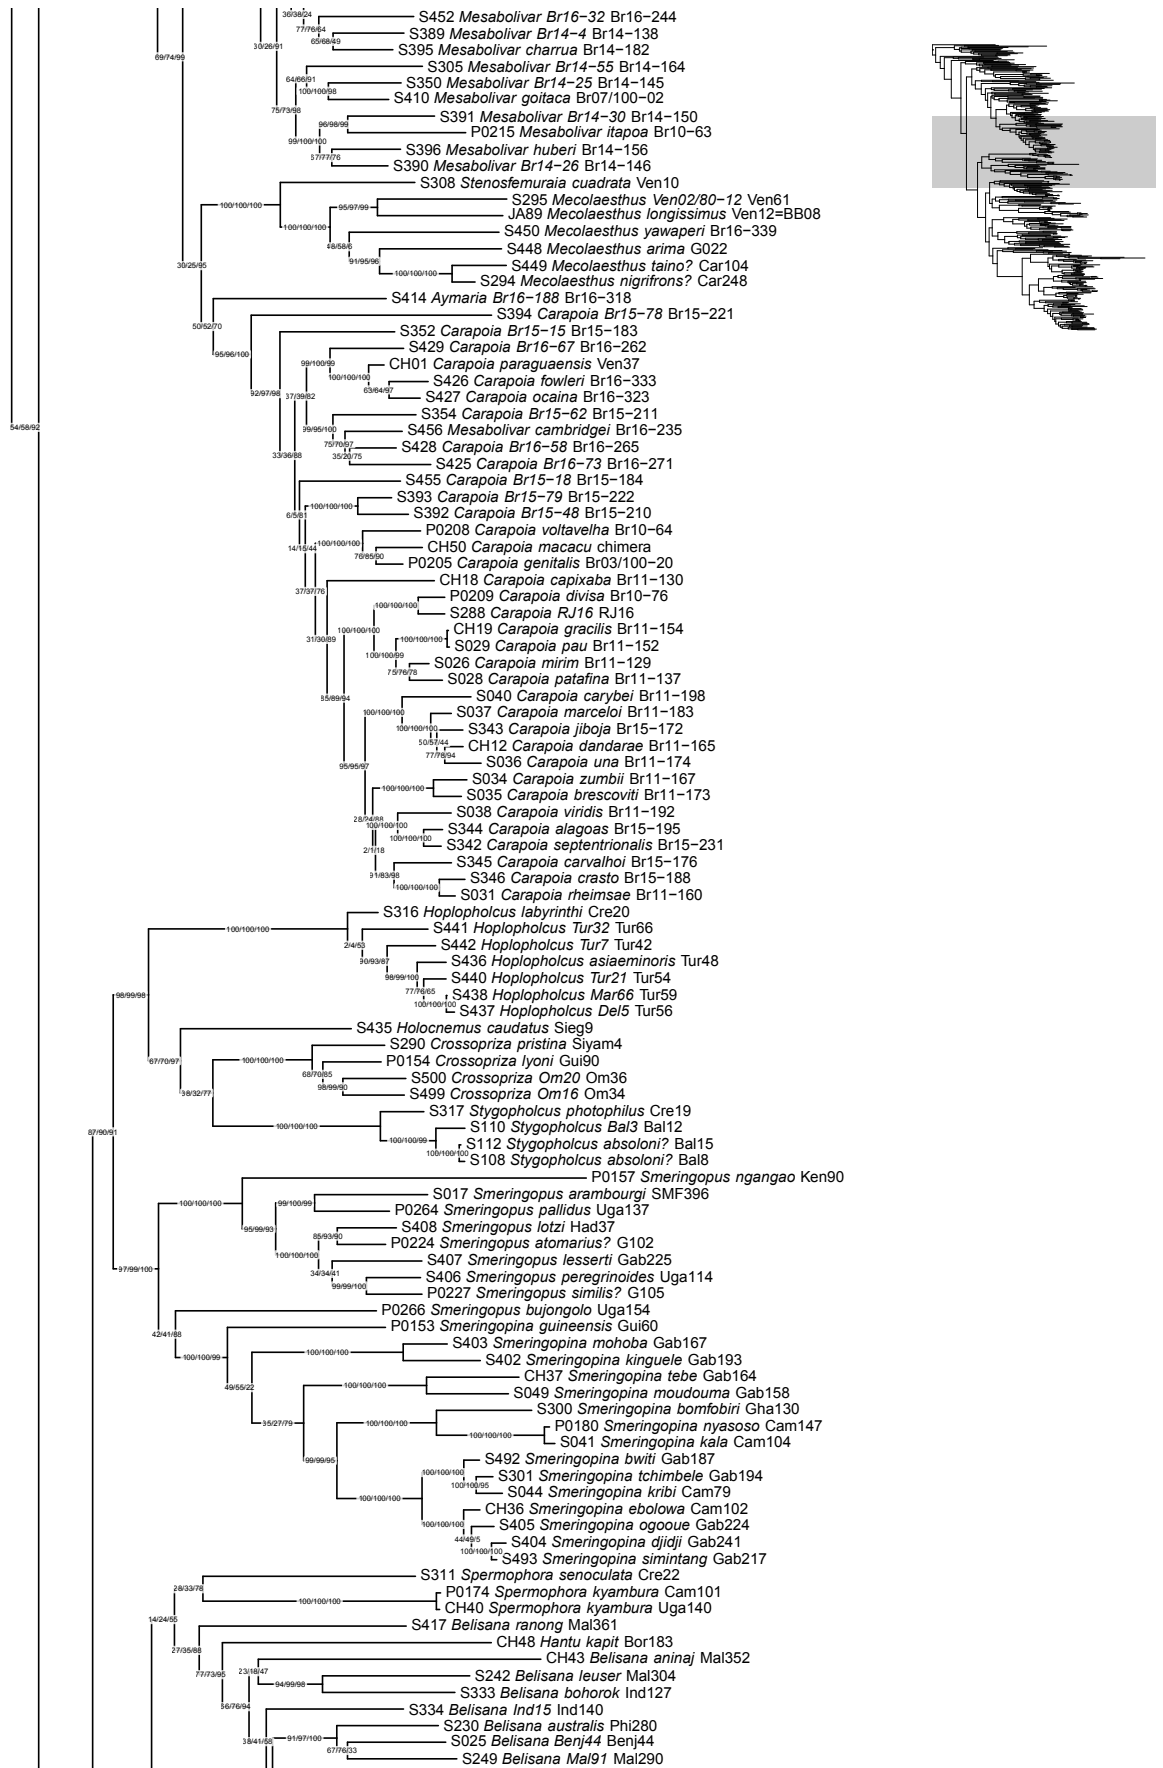

Figure S6 (b). Caption on page 27.

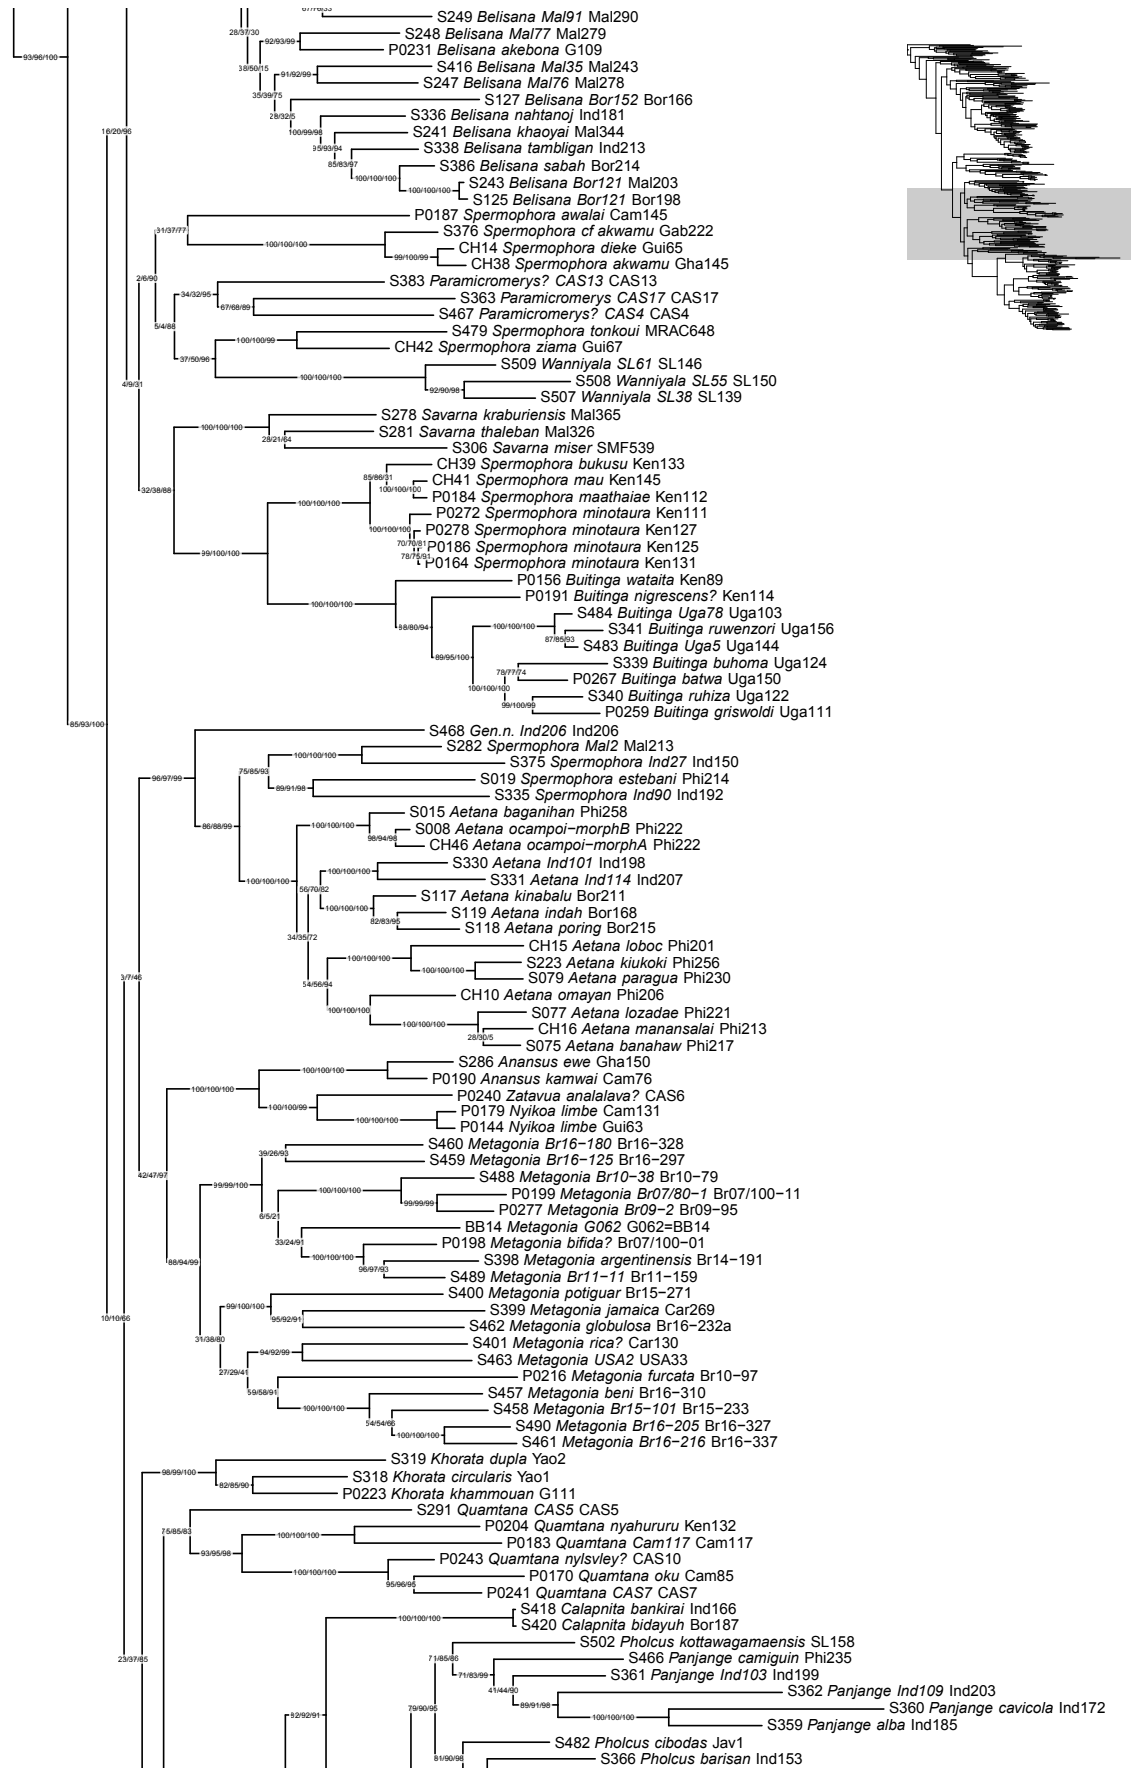

Figure S6 (c). Caption on page 27.

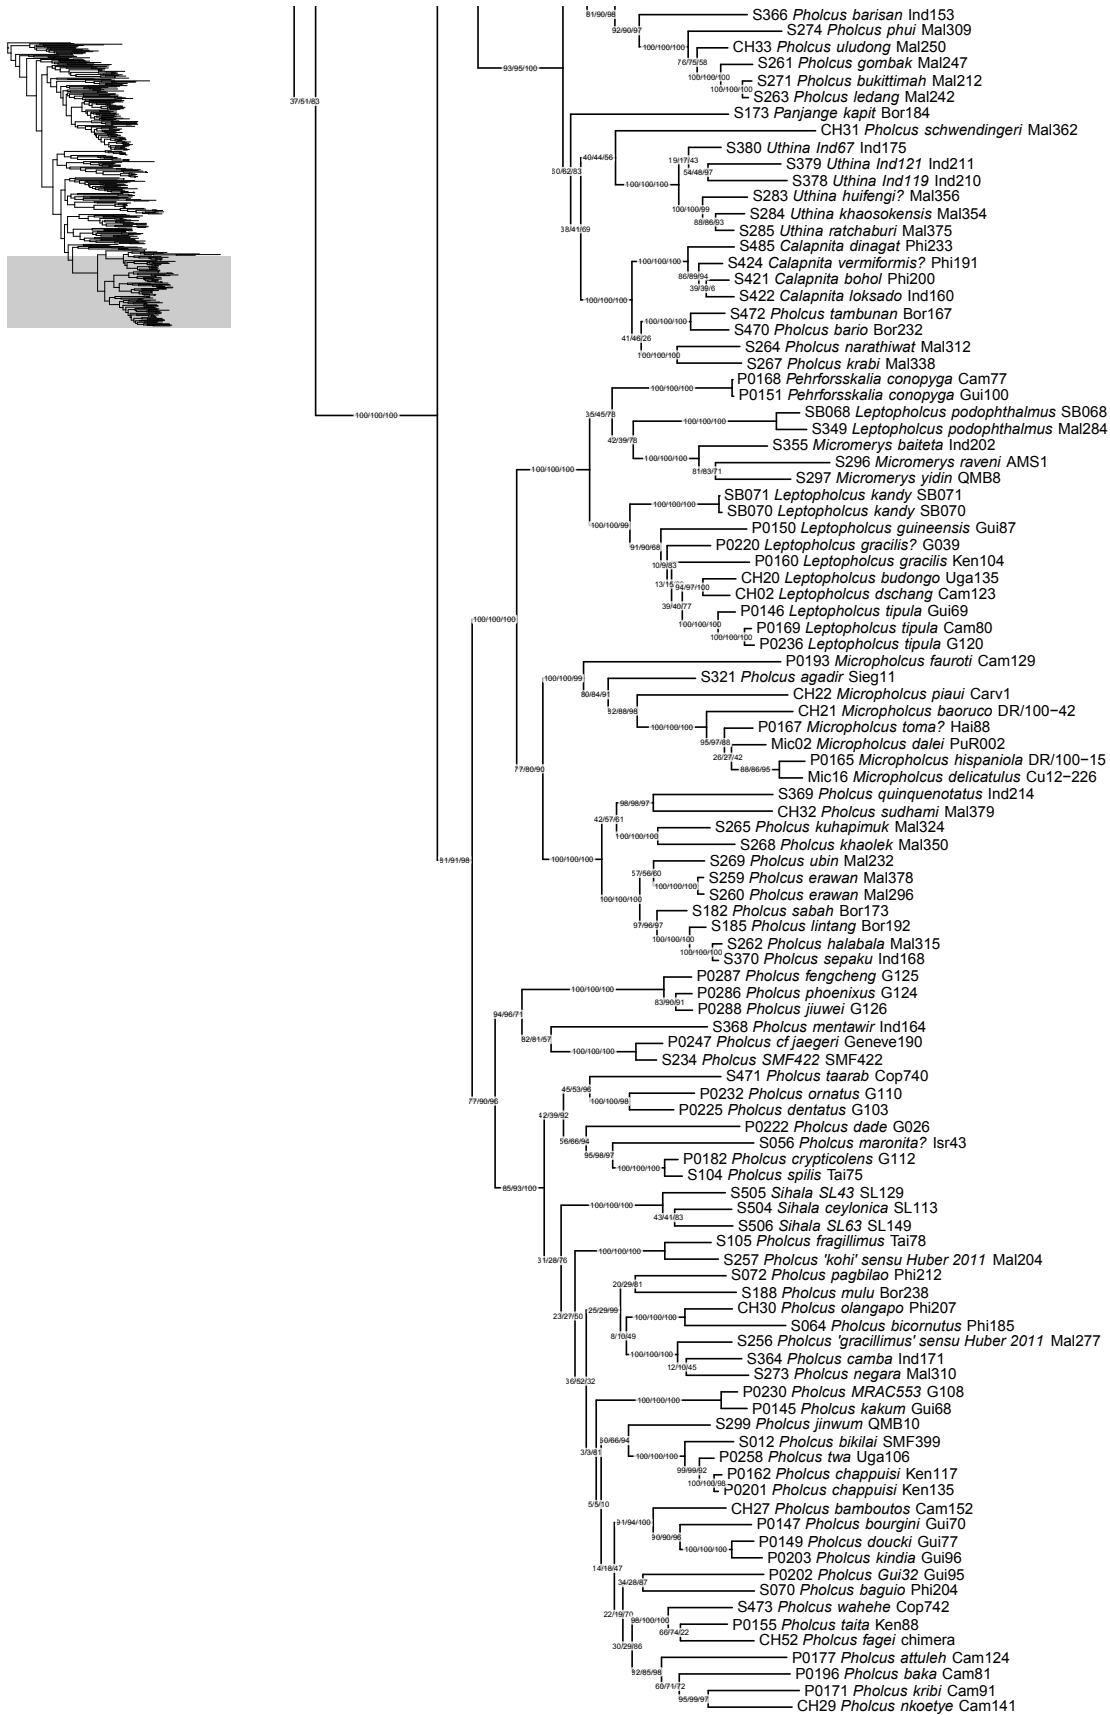

**Figure S6 (d).** Best maximum likelihood tree found by RAxML for the reduced sampling with minimum four loci available. Branch support values are standard bootstrap, rapid bootstrap and SH-like aLRT values, respectively, separated by a slash. Tip labels are composed of the specimens' code, species name, and collection vial number.

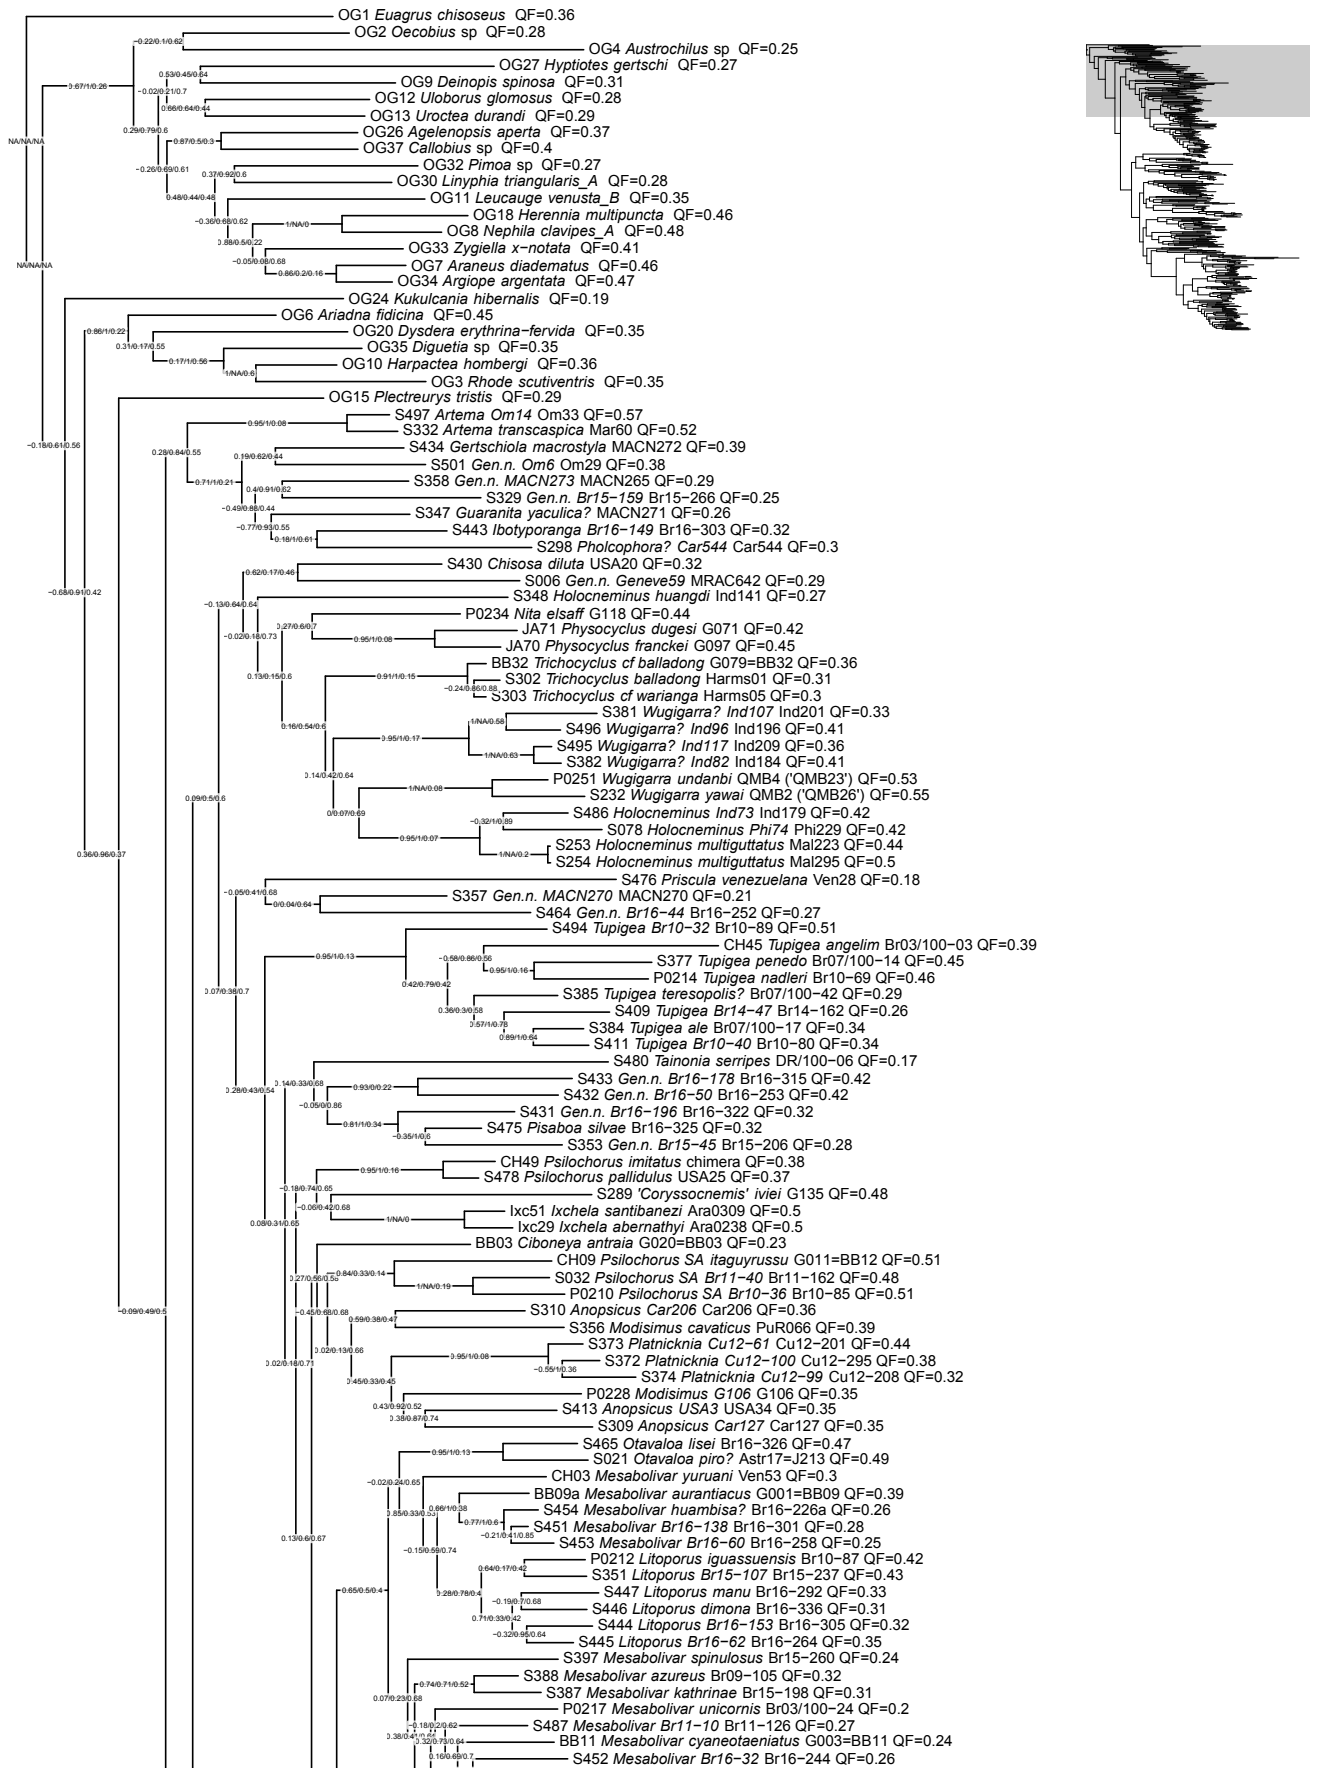

Figure S7 (a). Caption on page 31.

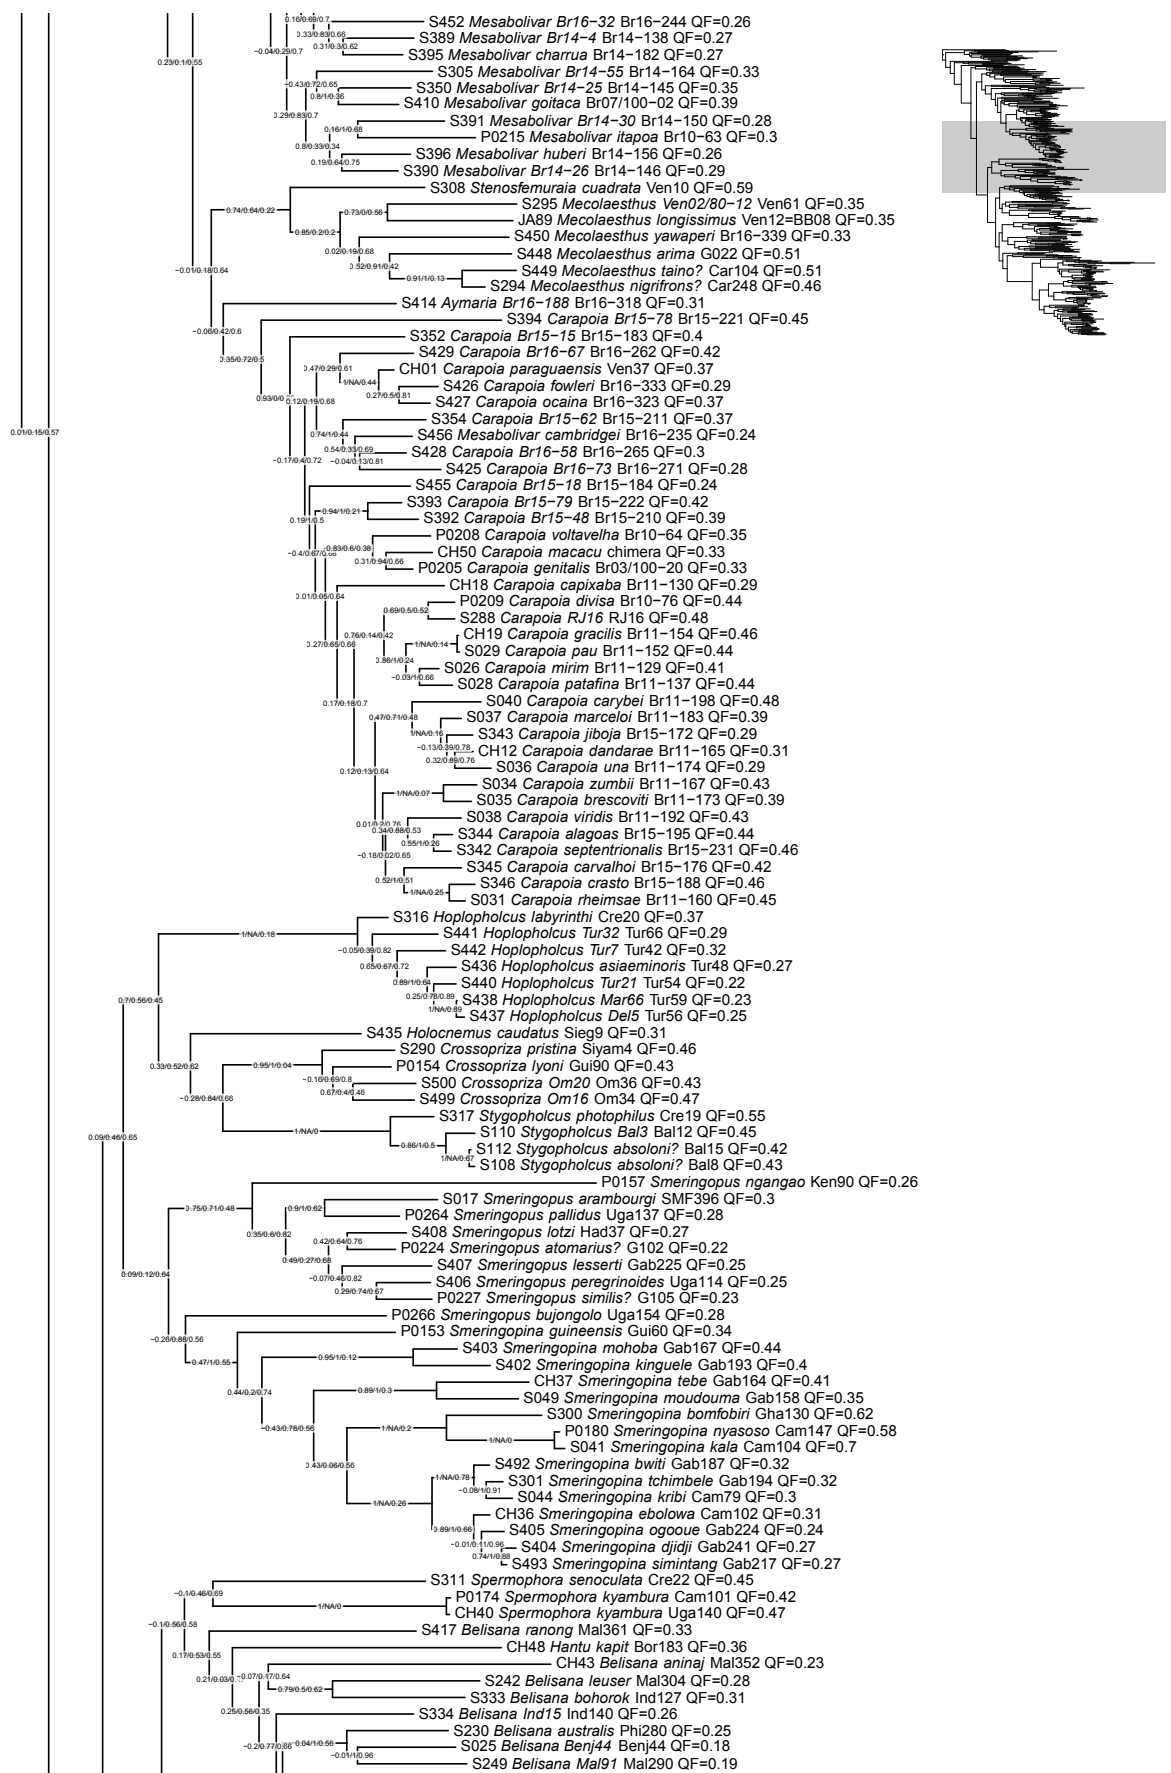

Figure S7 (b). Caption on page 31.

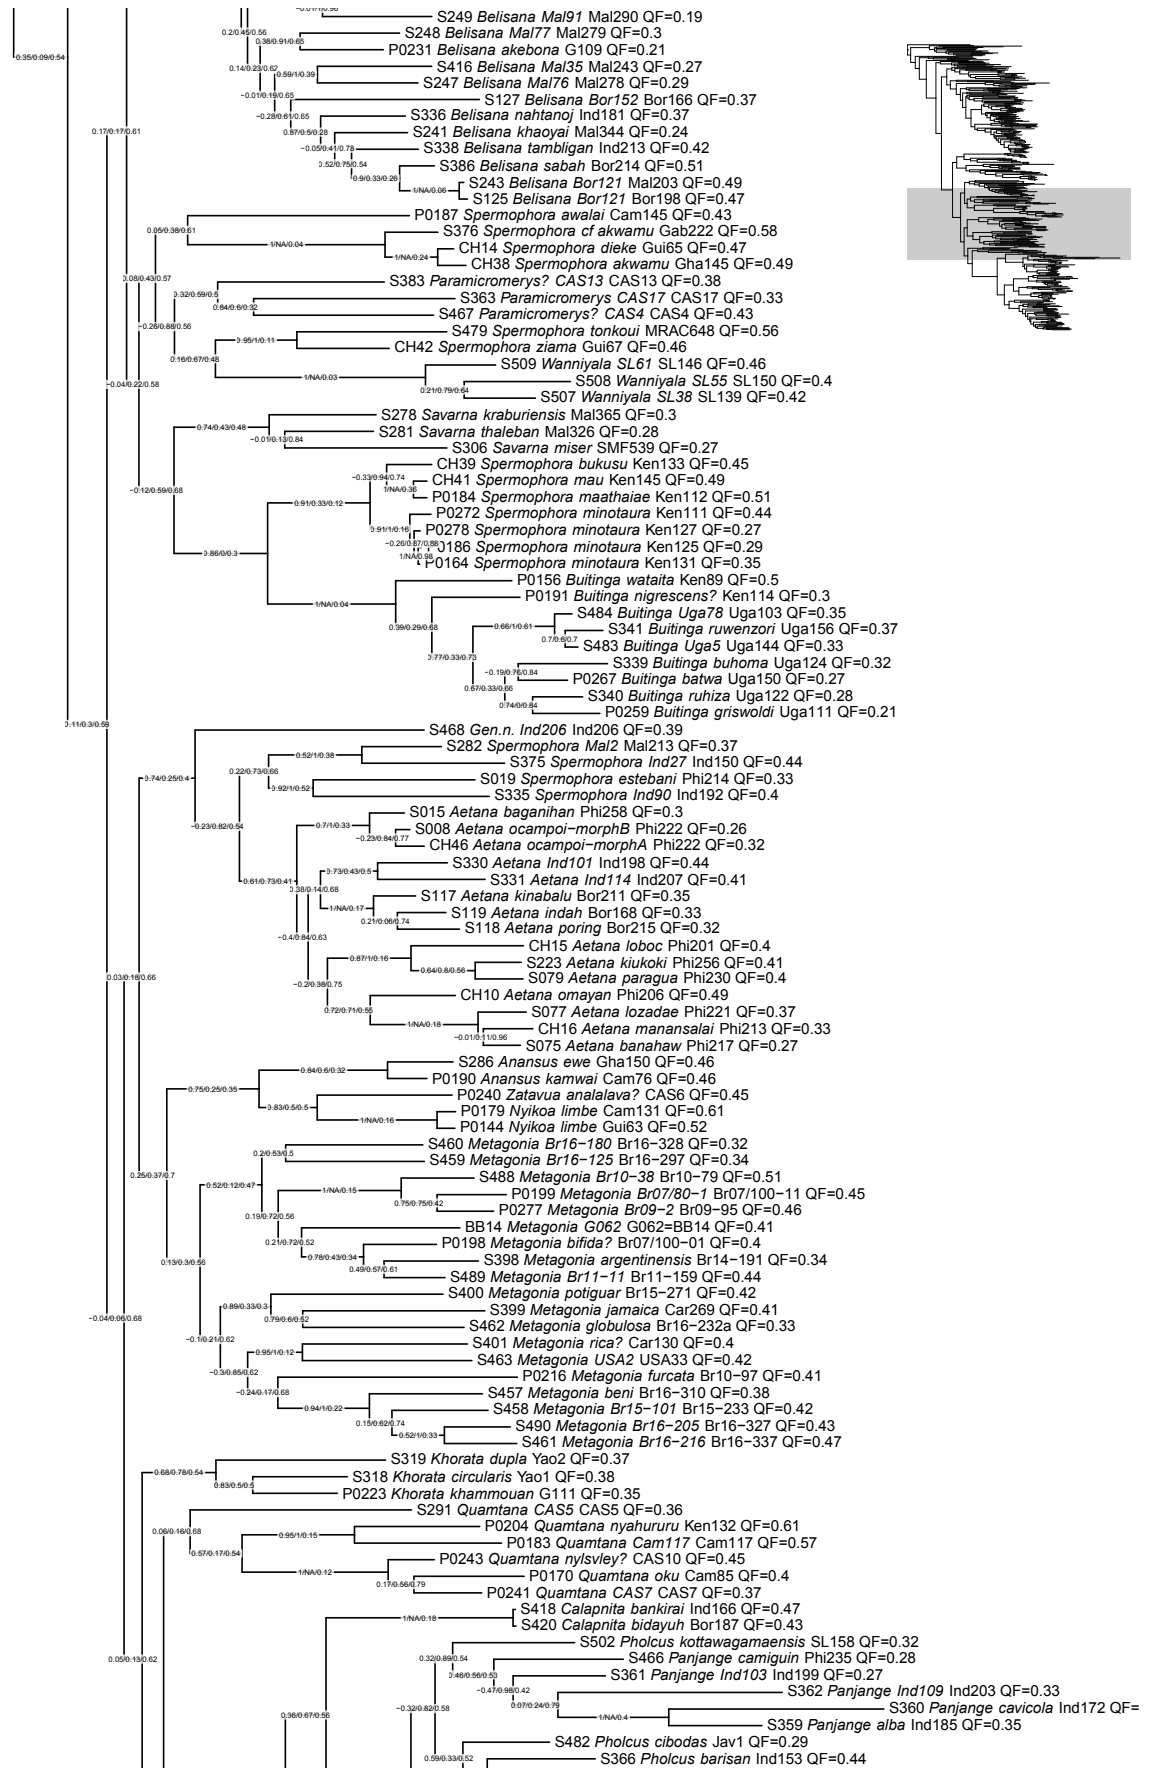

Figure S7 (c). Caption on page 31.

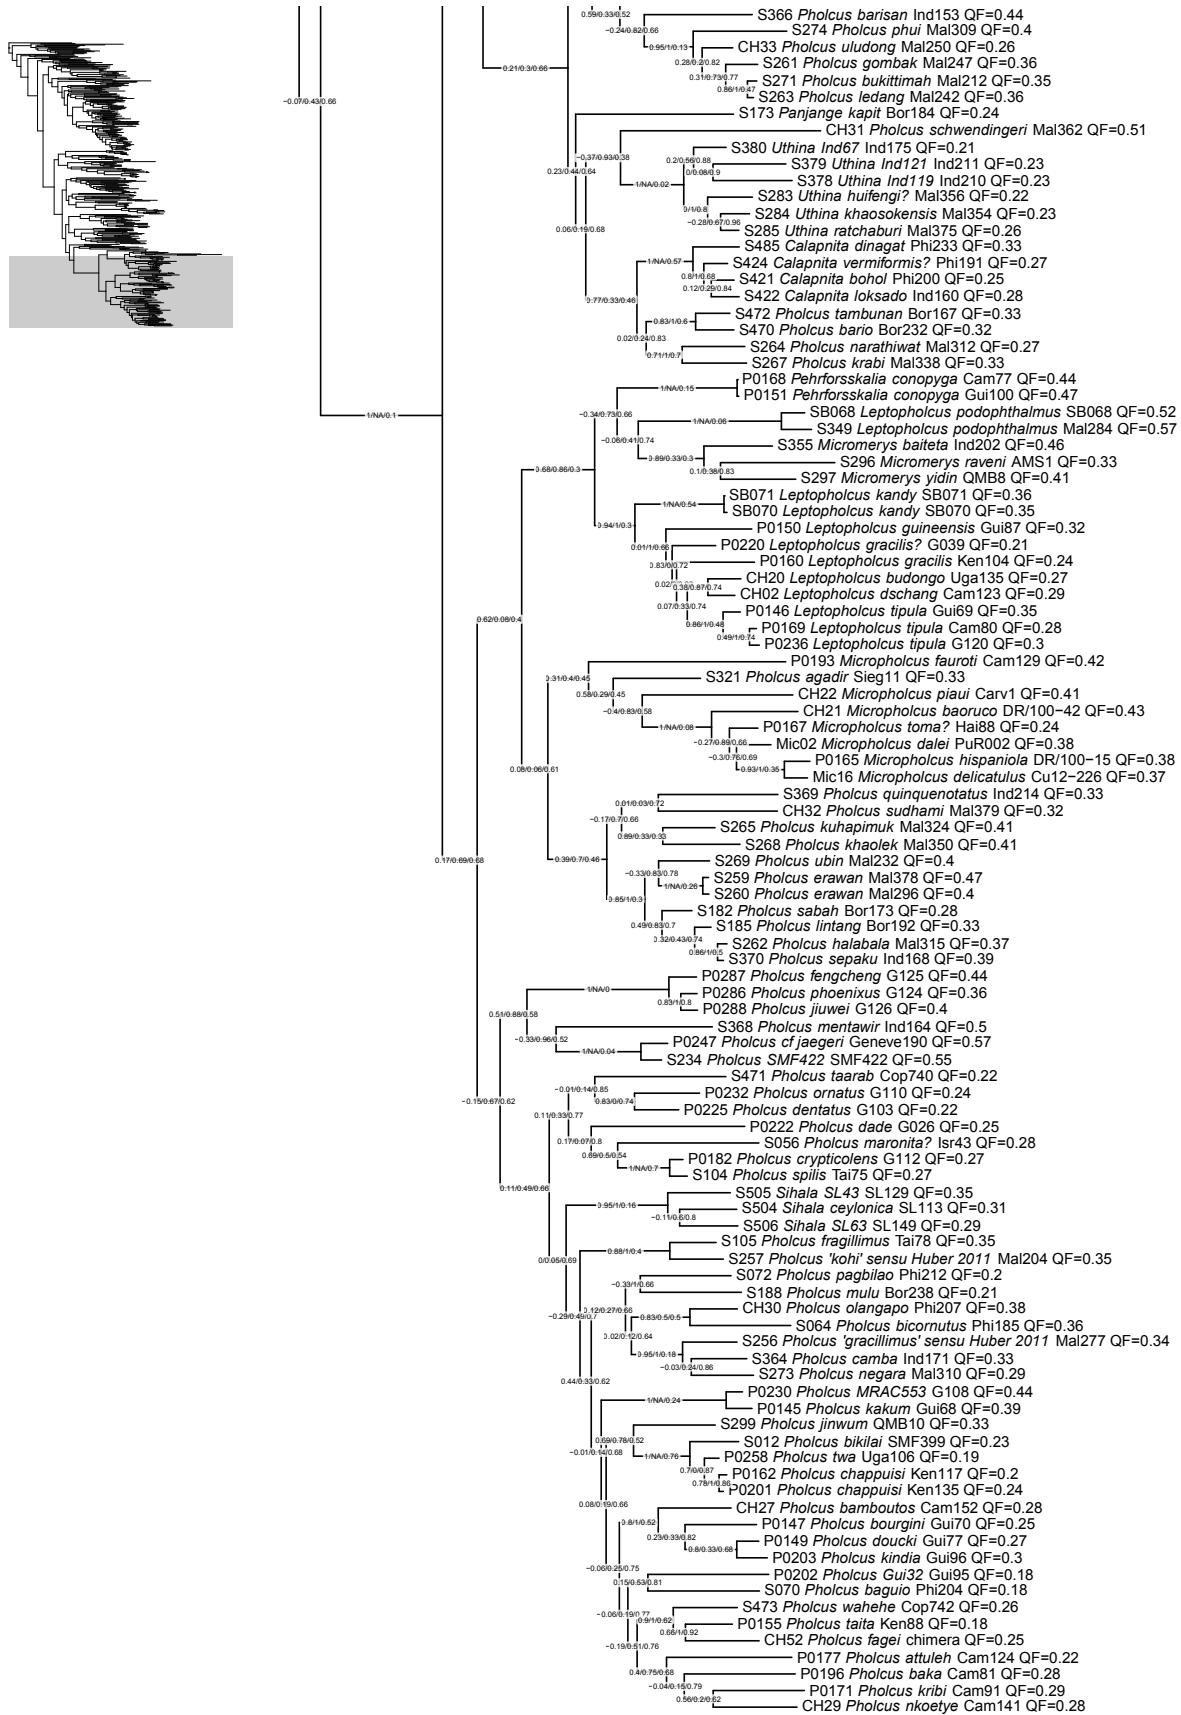

**Figure S7 (d).** Best maximum likelihood tree found by RAxML for the reduced sampling with minimum four loci available. Branch support values are quartetsampling scores (QC/QD/QU). QF scores are given at tips. Tip labels are composed of the specimens' code, species name, and collection vial number.

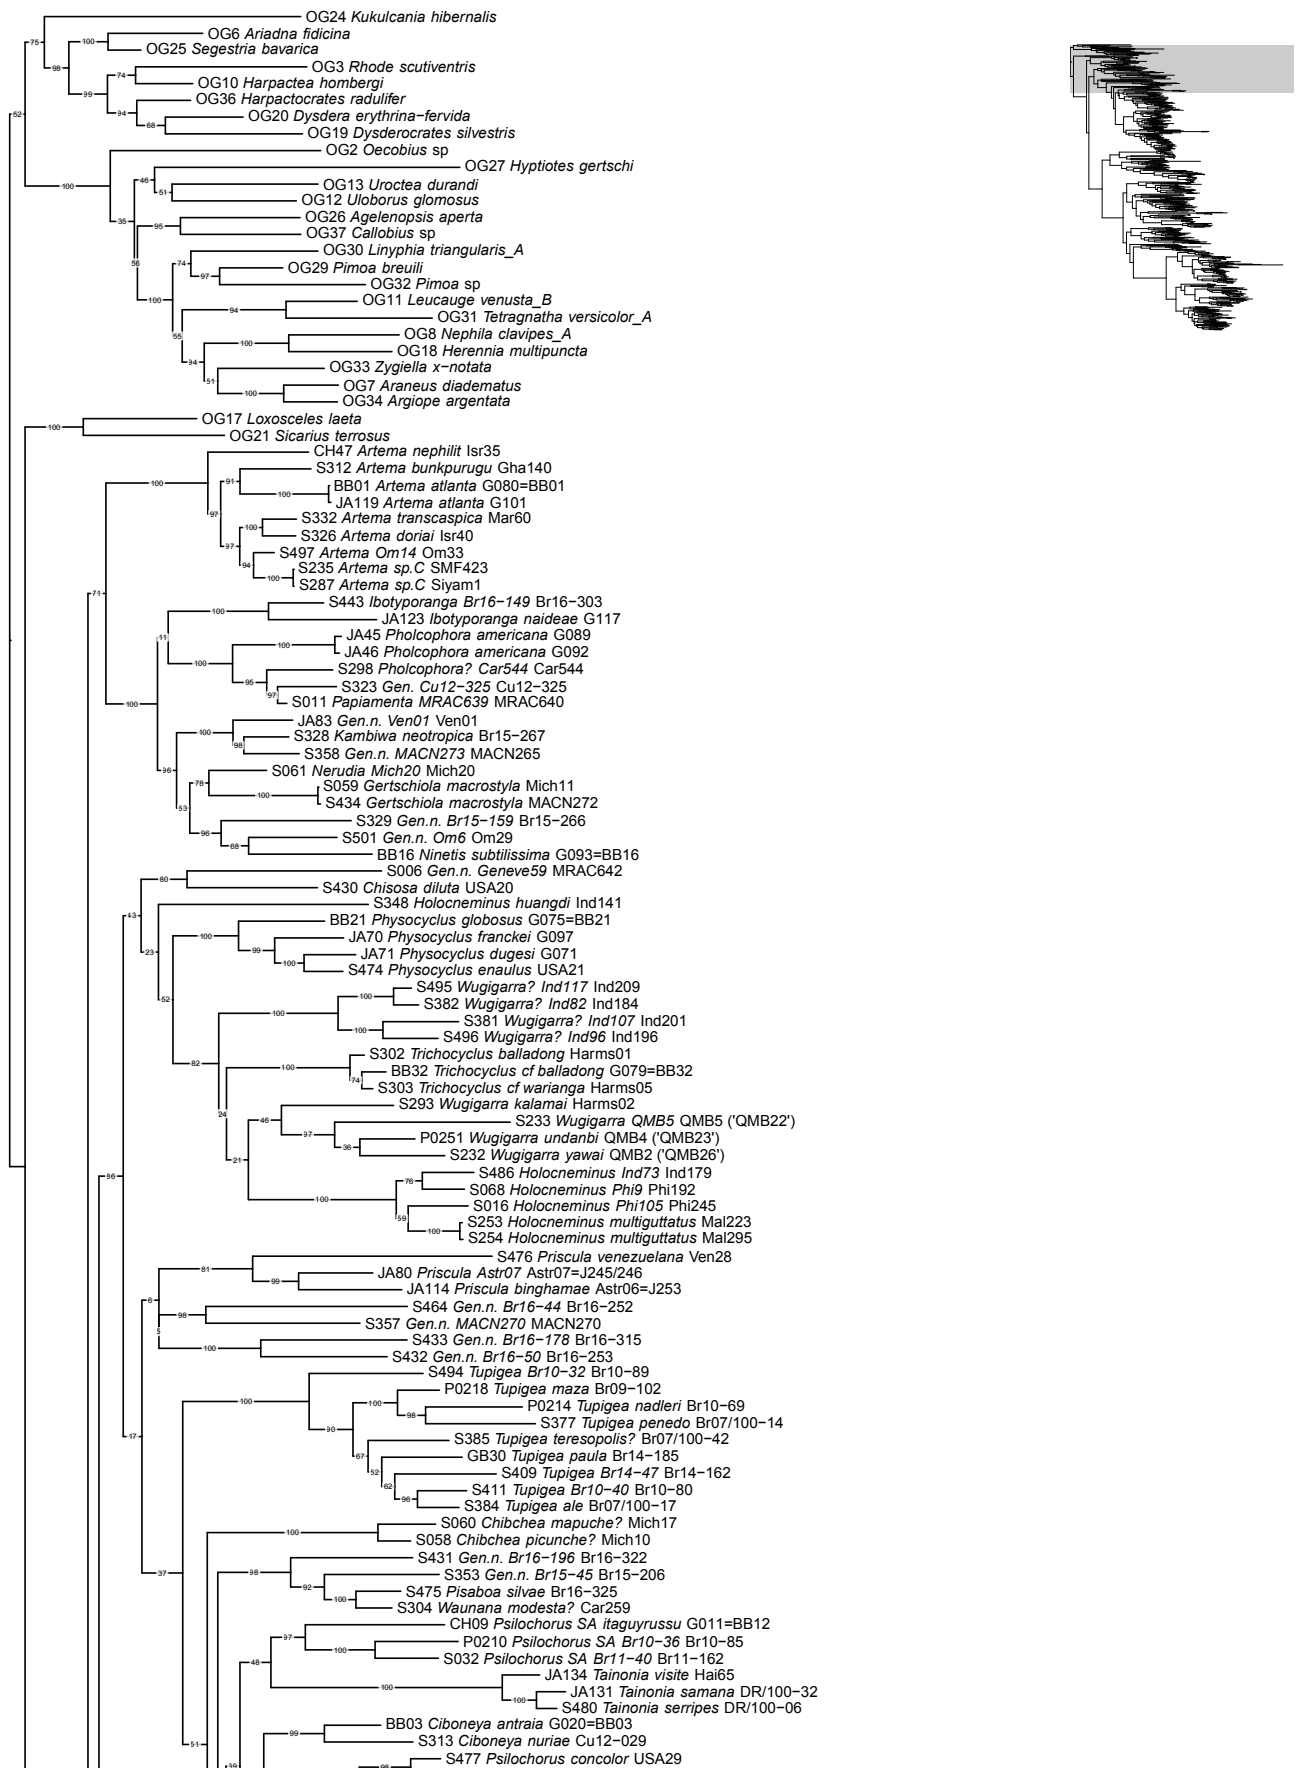

Figure S8 (a). Caption on page 37.



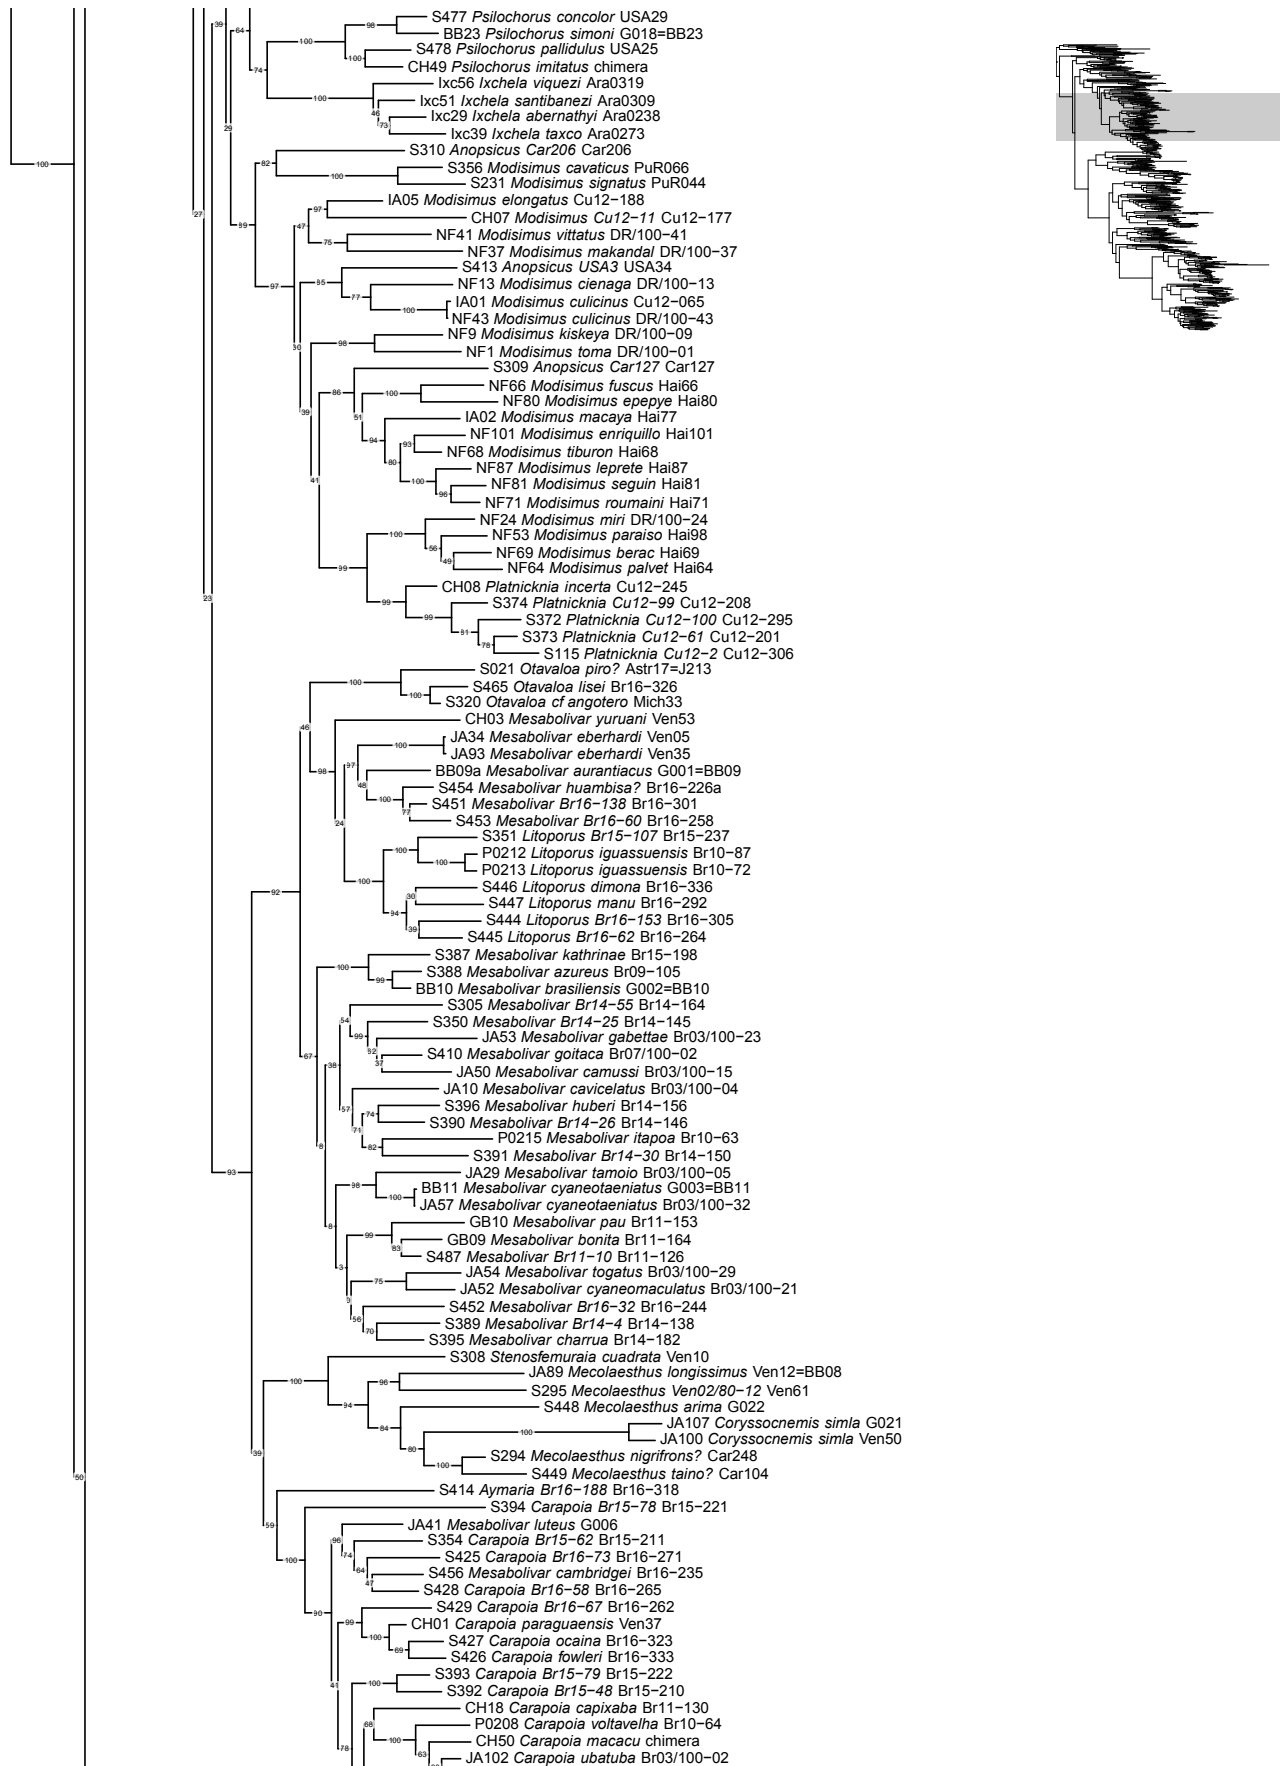

Figure S8 (b). Caption on page 37.

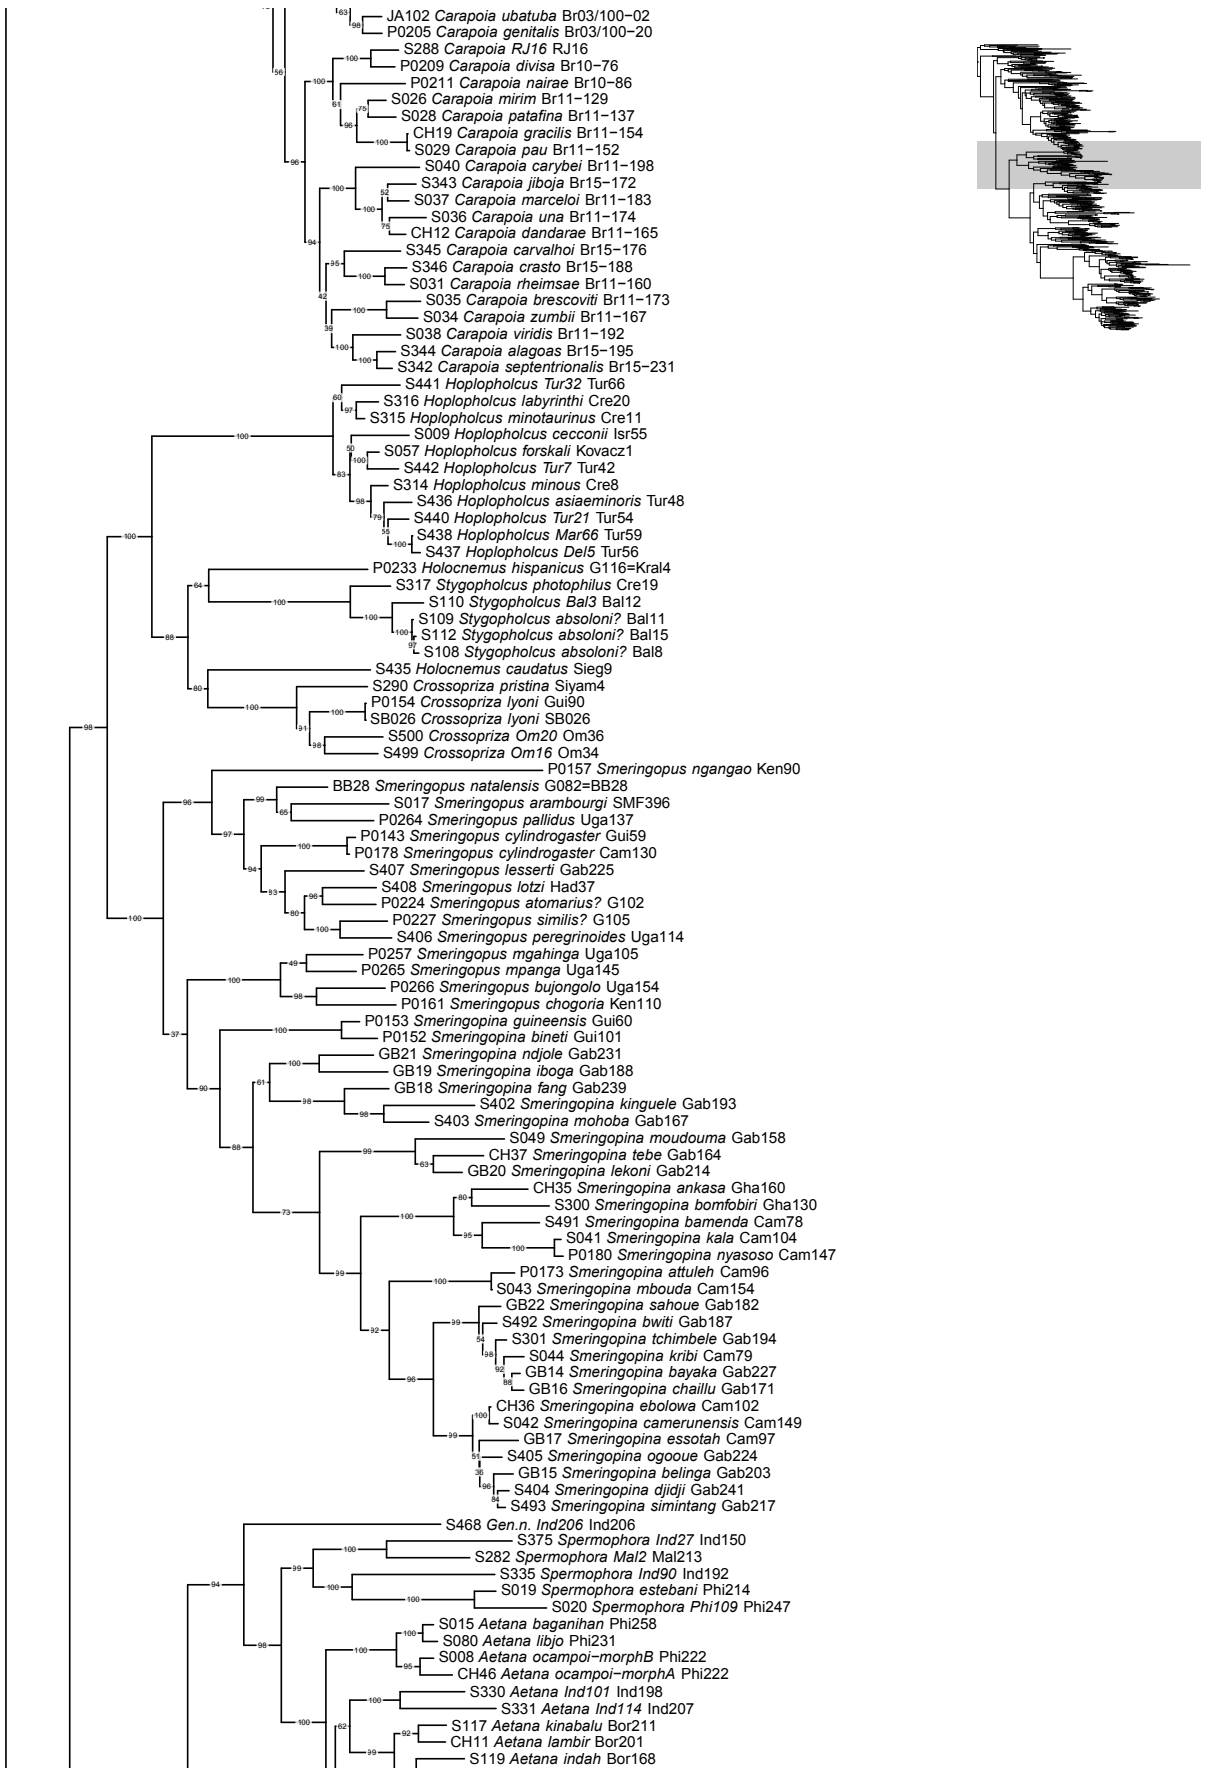

Figure S8 (c). Caption on page 37.

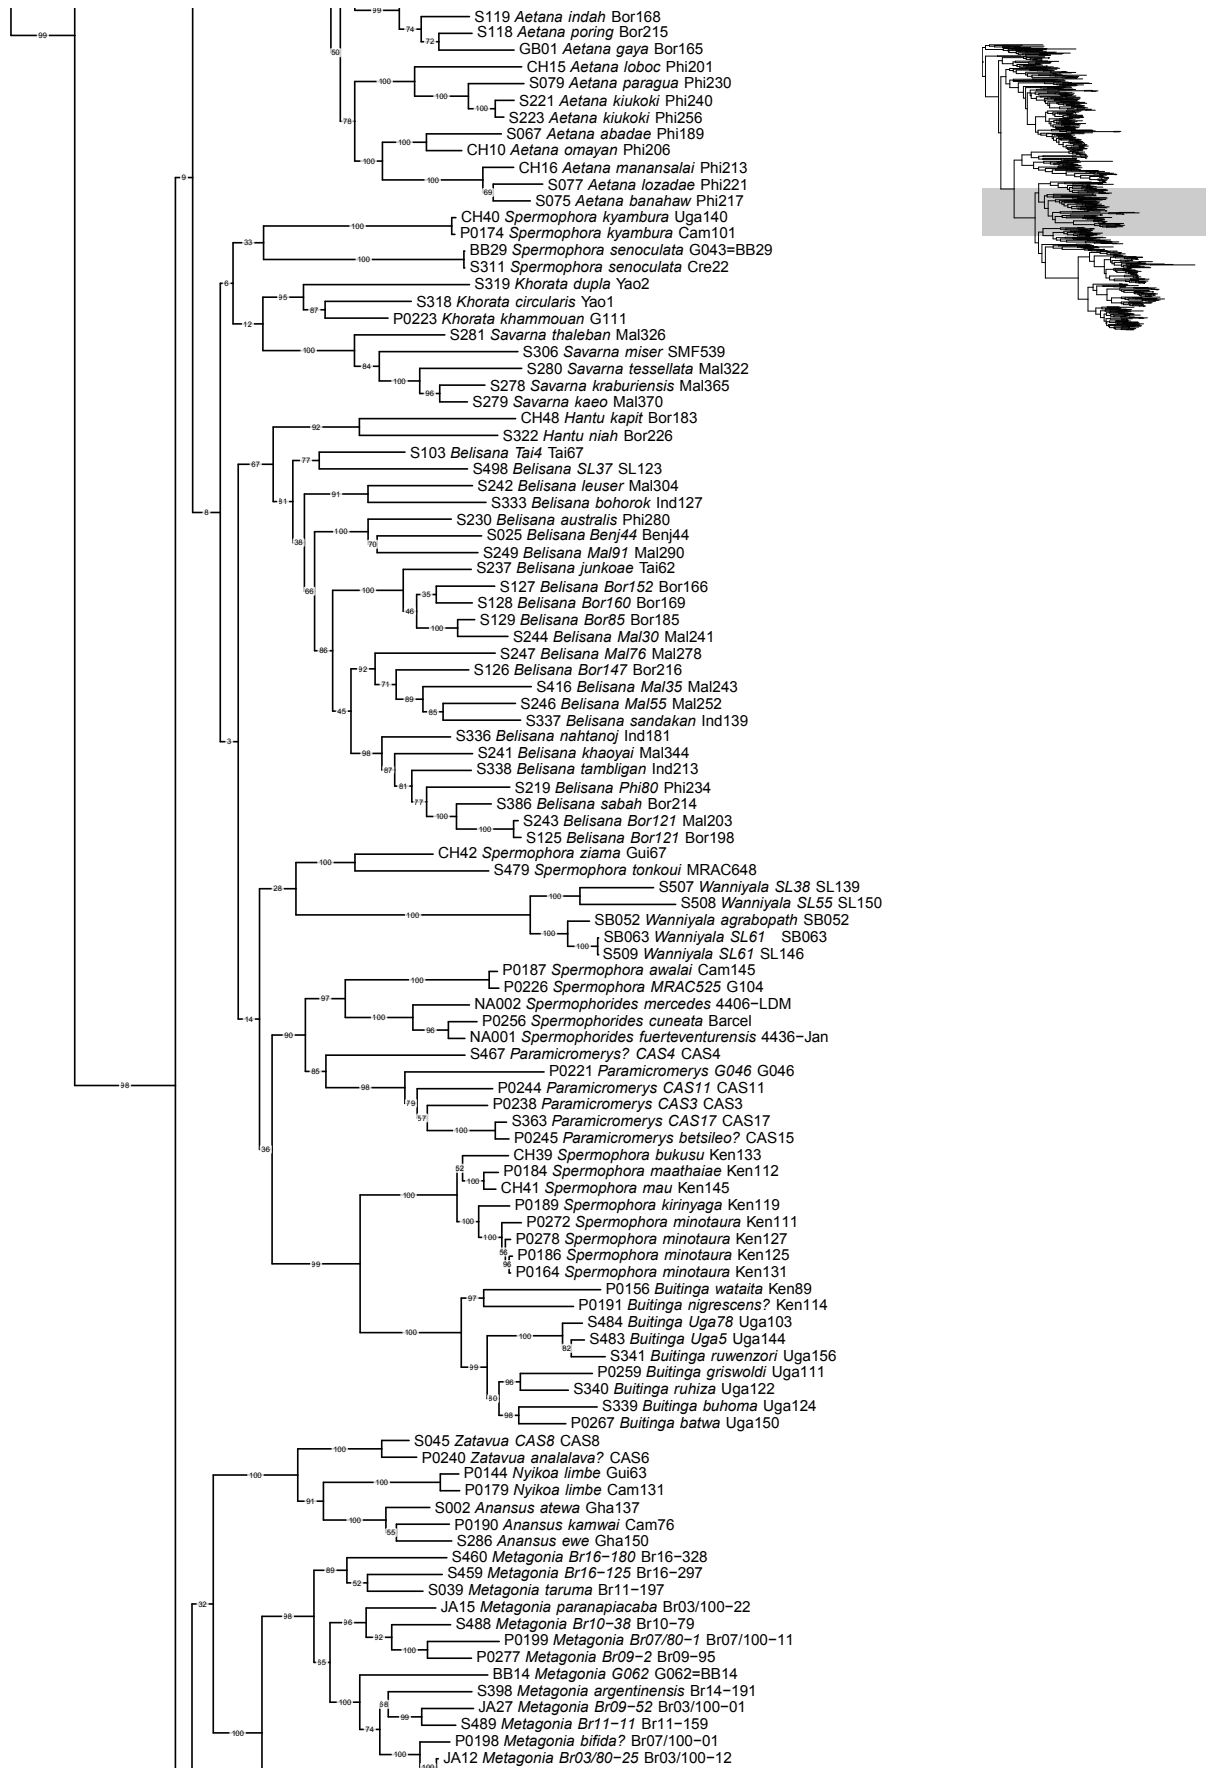

Figure S8 (d). Caption on page 37.

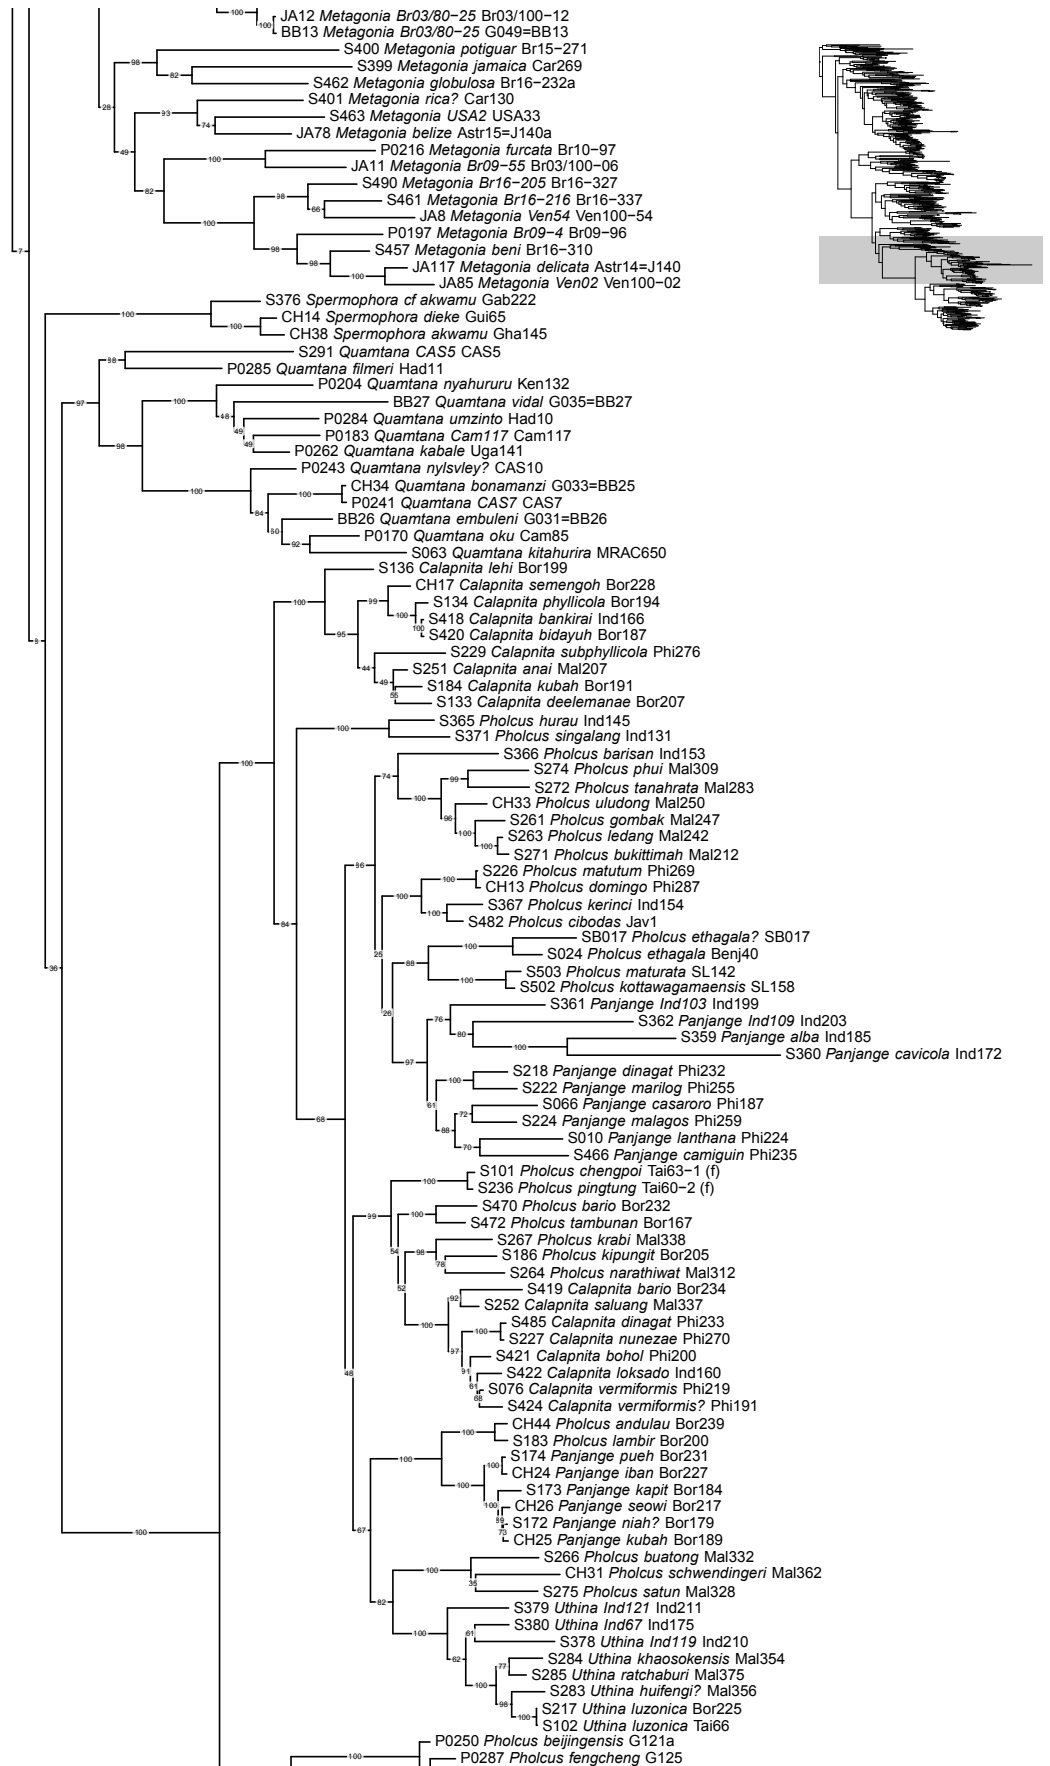

Figure S8 (e). Caption on page 37.

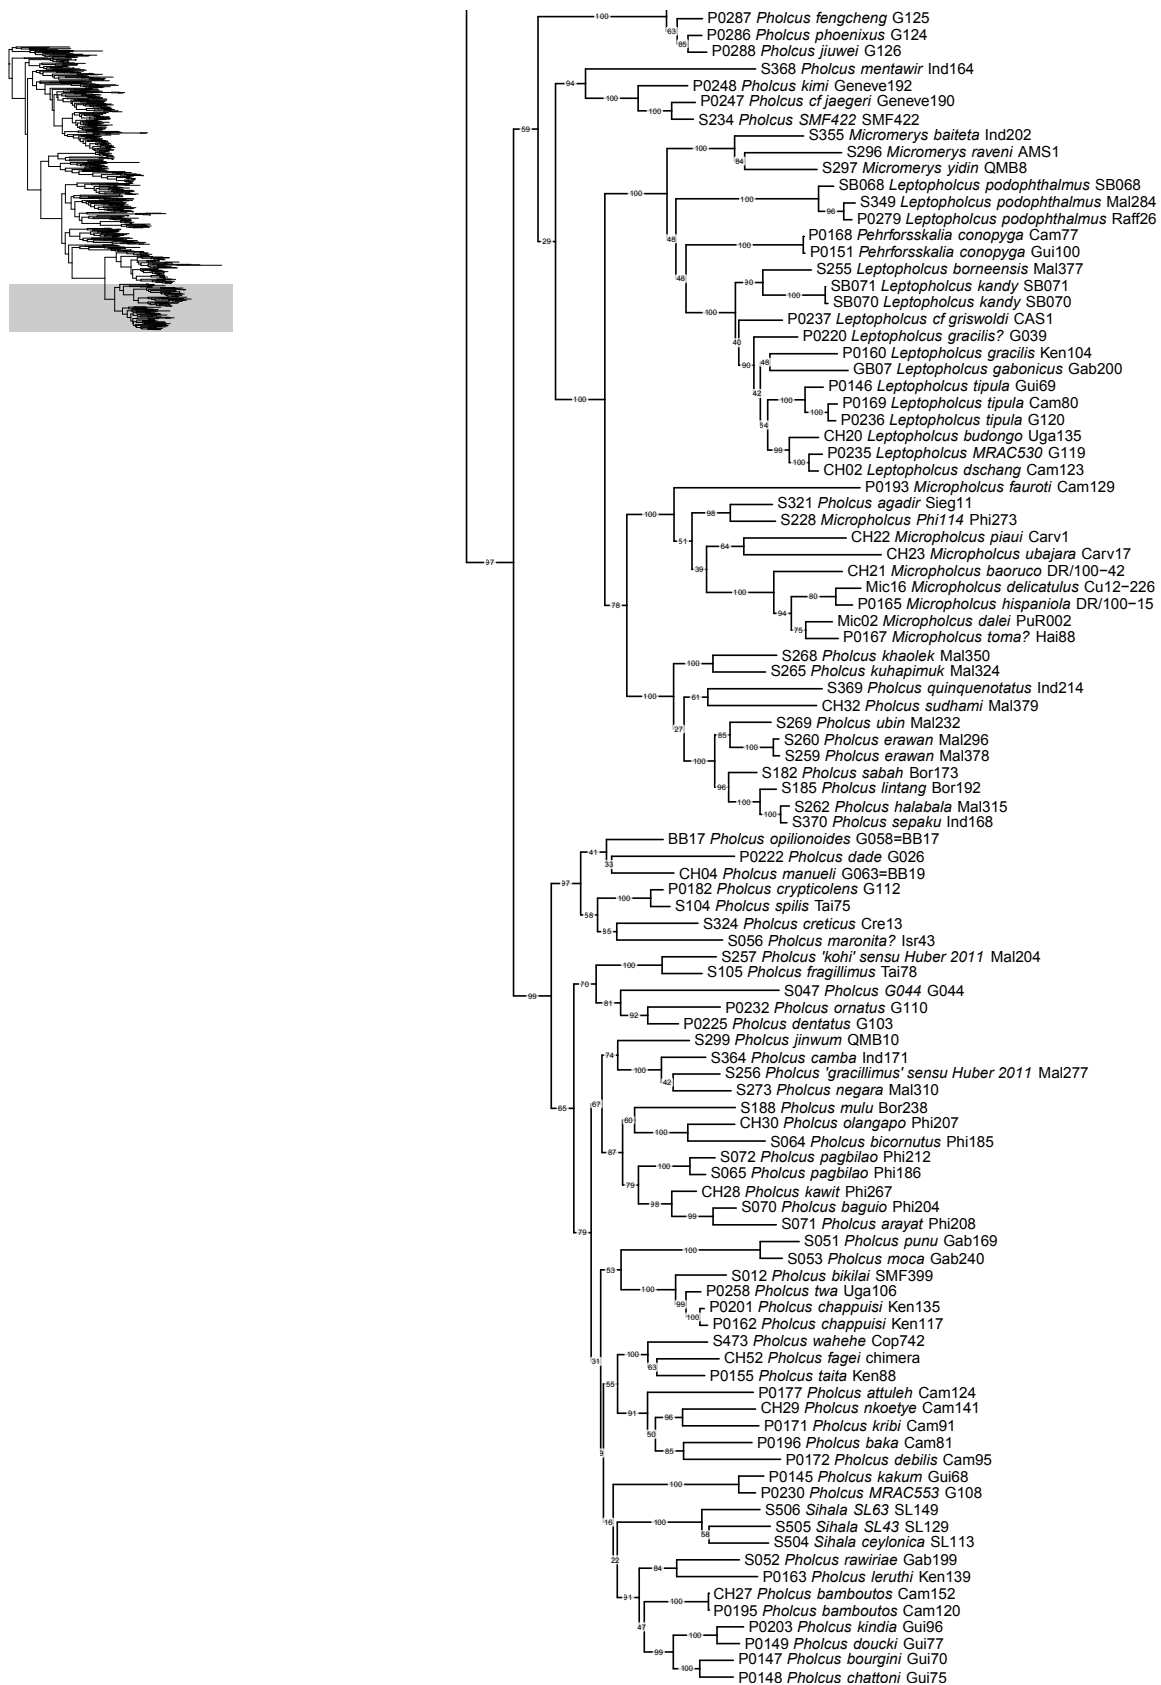

**Figure S8 (f).** Best maximum likelihood tree found by RAxML for the data set reduced by RogueNaRok. Branch support values rapid bootstrap scores. Tip labels are composed of the specimens' code, species name, and collection vial number.

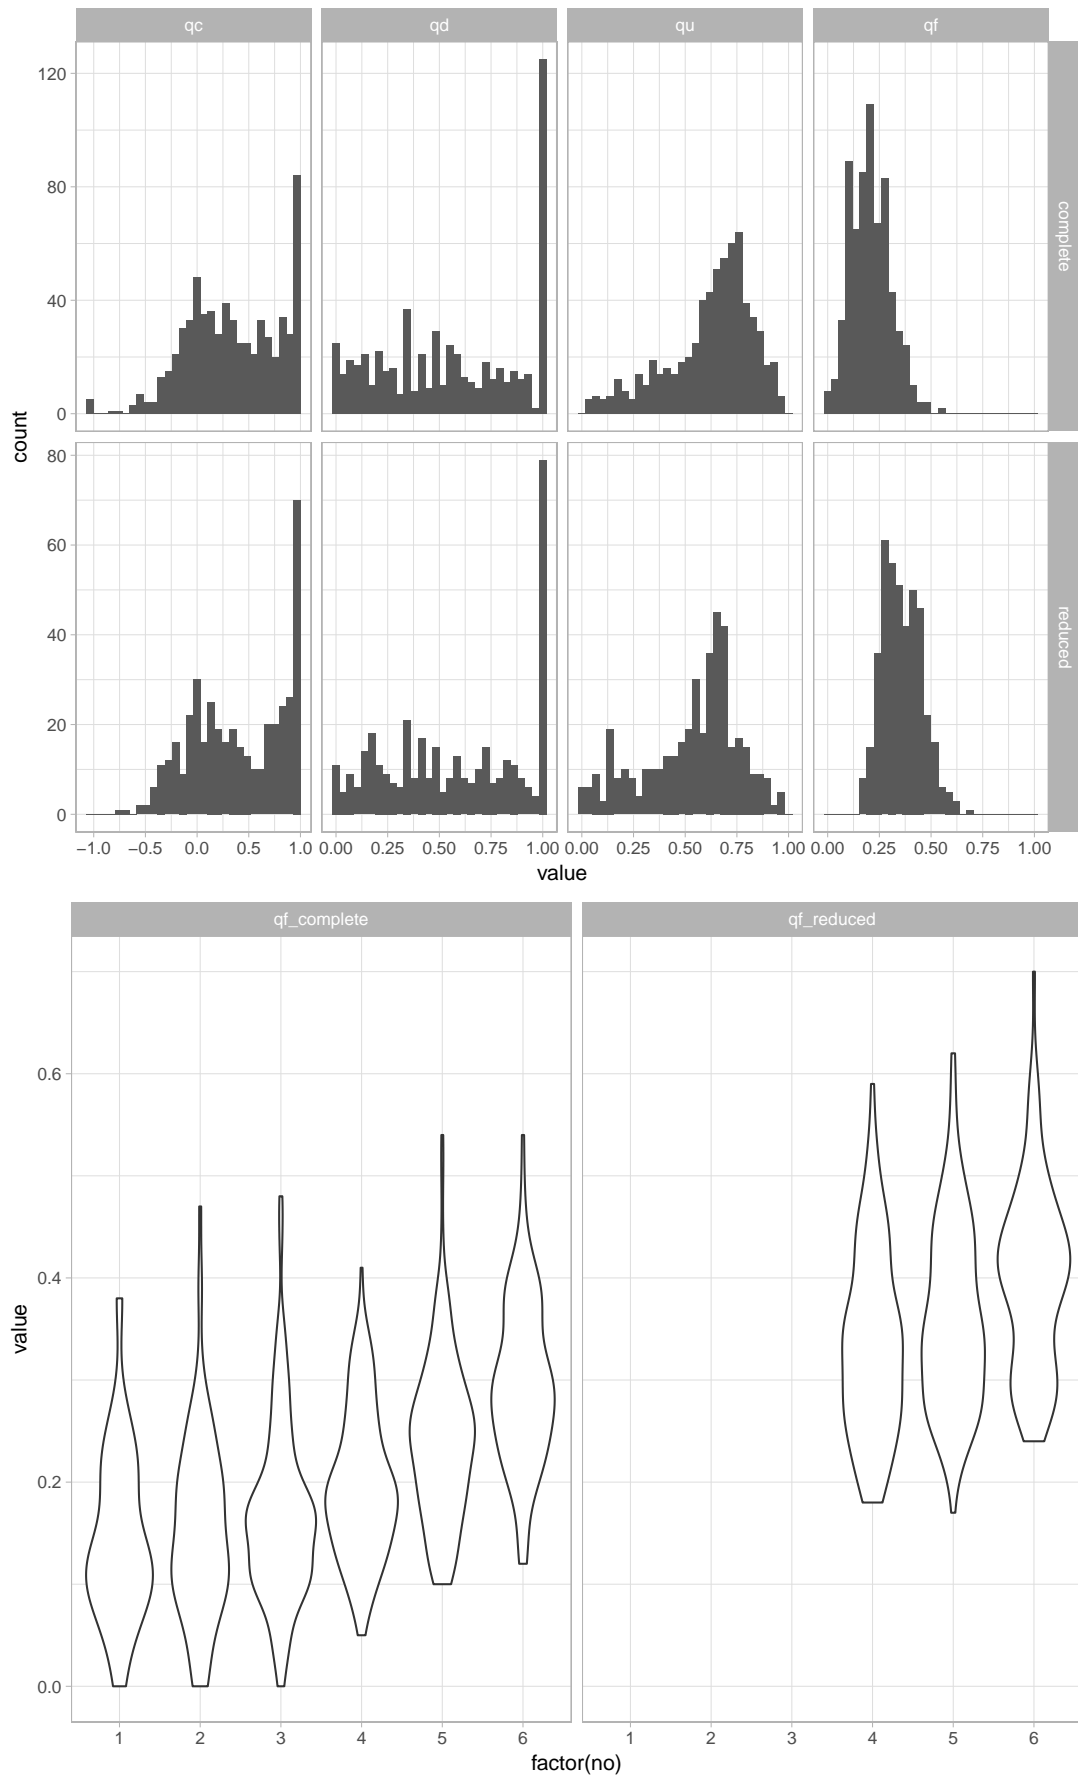

**Figure S9:** Branch support comparison between RAxML trees for the complete sampling (Fig. S4) and reduced sampling with minimum 4 loci available (Fig. S7). Upper half: Histograms of quartet sampling scores; lower half: equal-area violin plots of QF scores (low values indicate taxa with instable phylogenetic position).

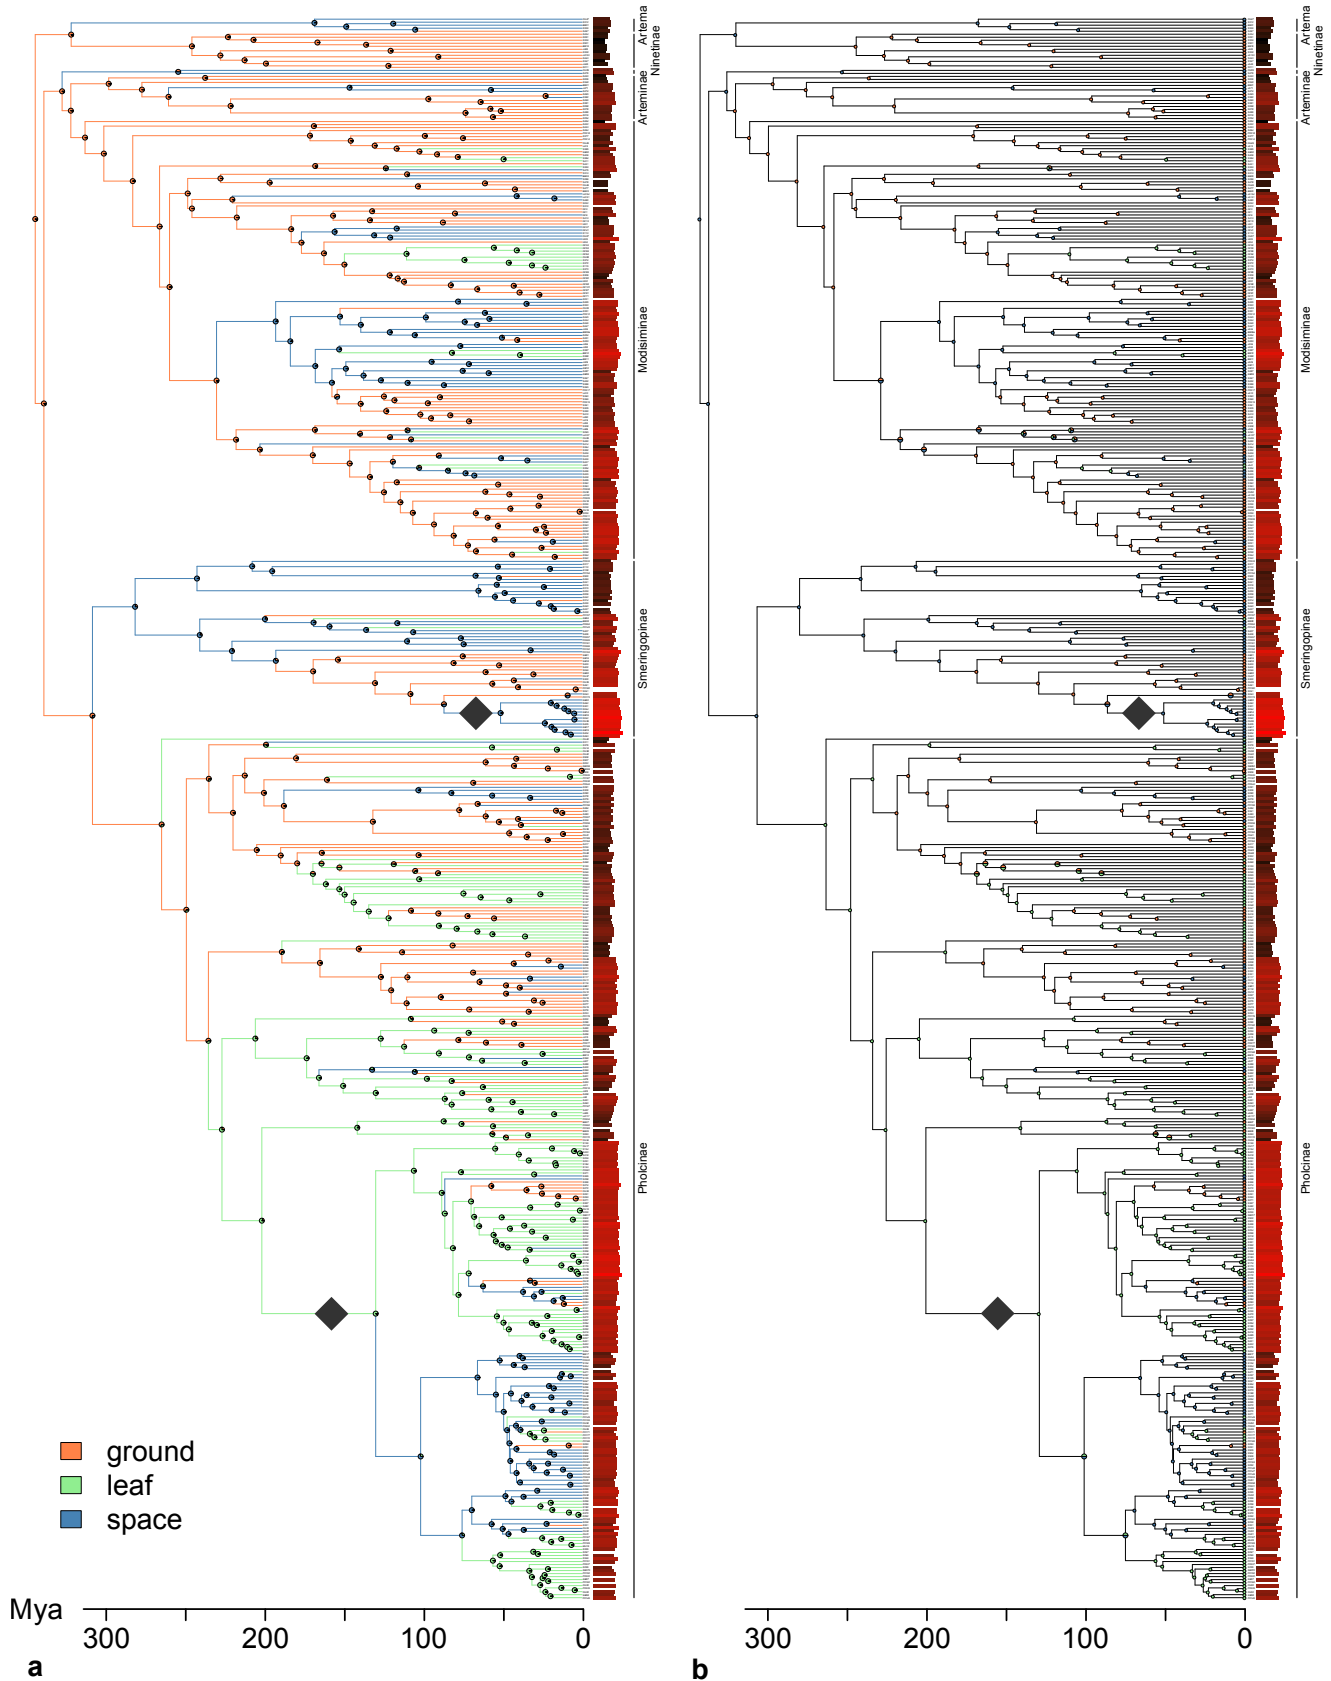

**Figure S10:** Time tree inferred with treePL with ancestral states (a) inferred by maximum likelihood and (b) reconstructed by maximum parsimony. Pies at nodes in (a) depict ancestral state likelihoods while branch colors in code the most likely state. Pies at nodes in (b) give the most parsimonious state(s). Bars next to tips illustrate the ratio of metatarsus to tibia of the first leg which was used as a proxy of microhabitat. Diamonds show speciation rate shifts of the best fitting scenario inferred with BAMM.

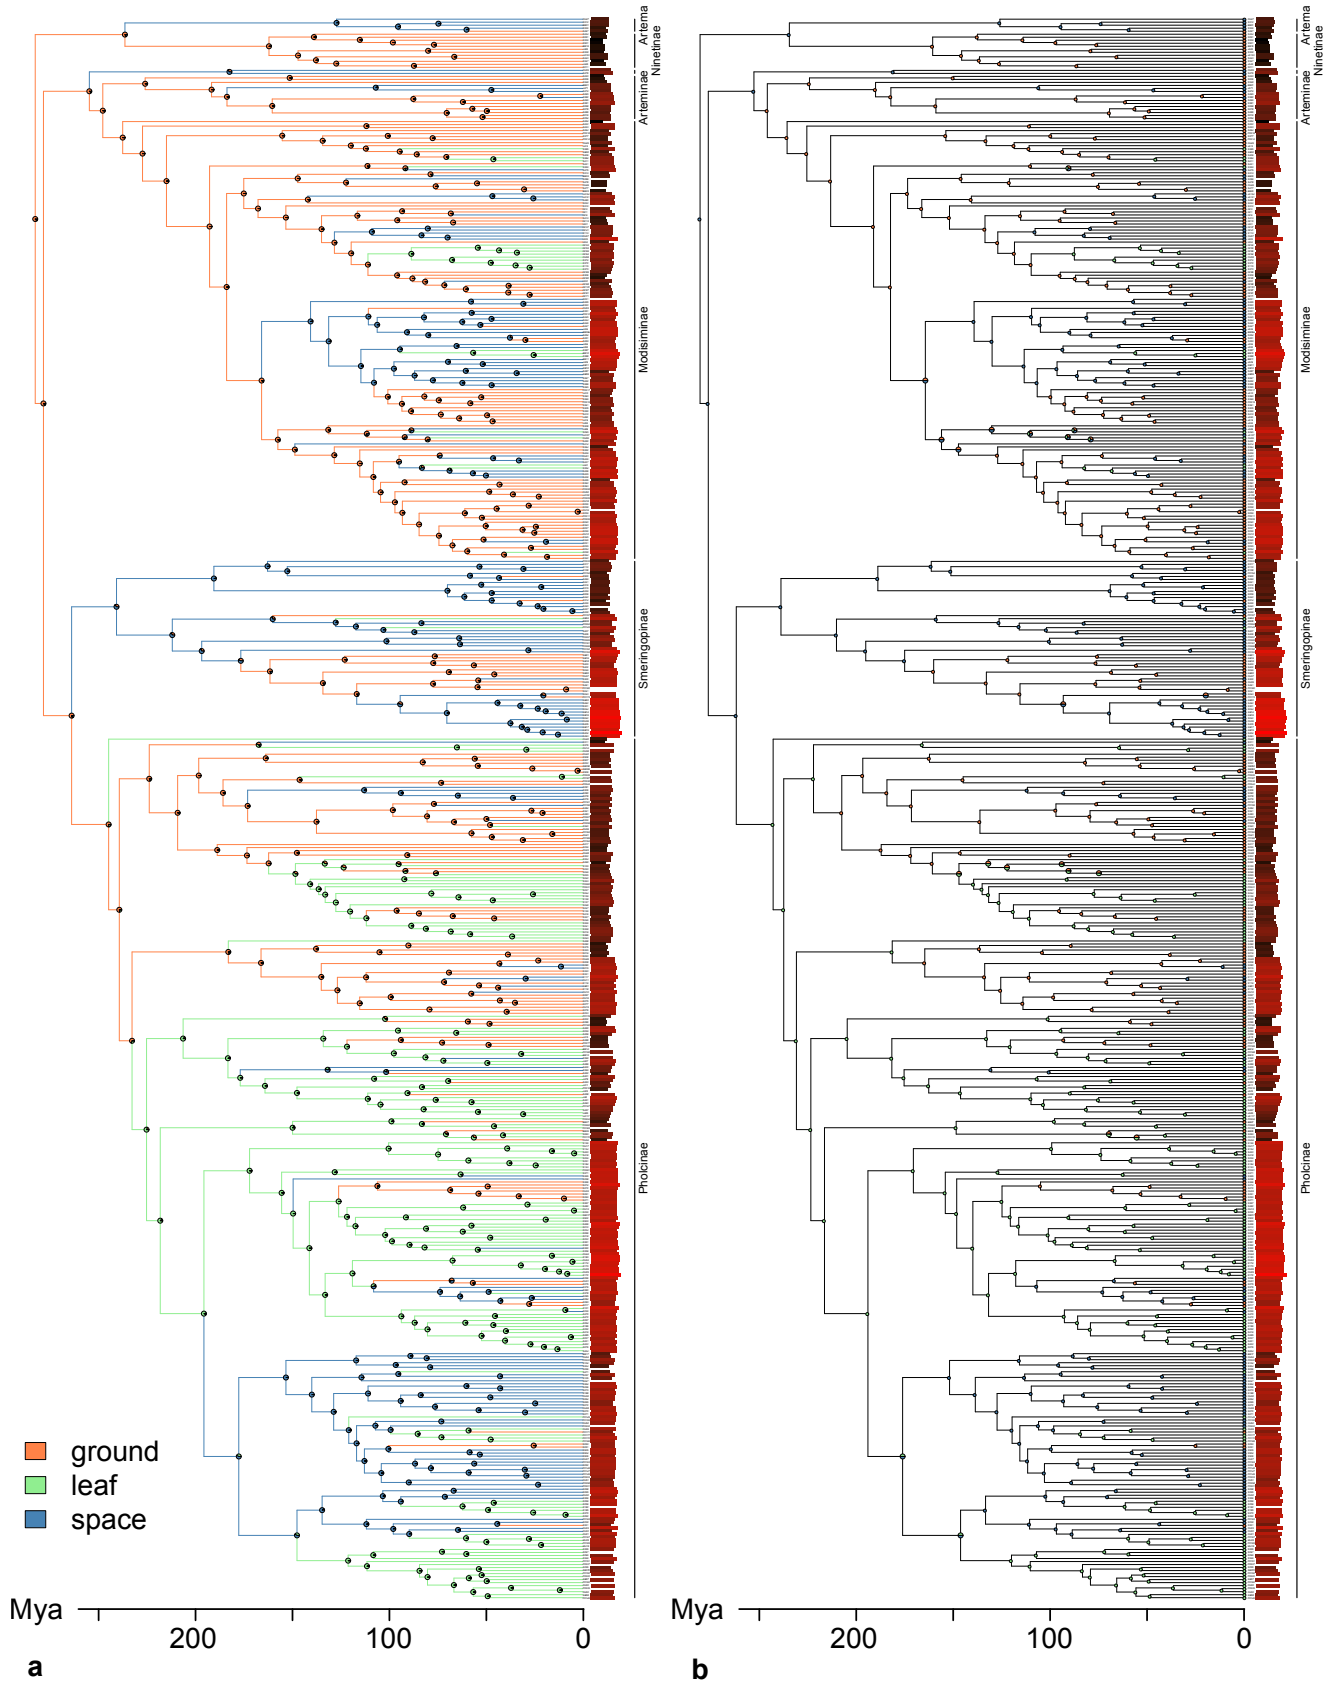

**Figure S11:** Time tree inferred with MCMCtree with ancestral states (a) inferred by maximum likelihood and (b) reconstructed by maximum parsimony. Pies at nodes in (a) depict ancestral state likelihoods while branch colors in code the most likely state. Pies at nodes in (b) give the most parsimonious state(s). Bars next to tips illustrate the ratio of metatarsus to tibia of the first leg which was used as a proxy of microhabitat. Diamonds show speciation rate shifts of the best fitting scenario inferred with BAMM.



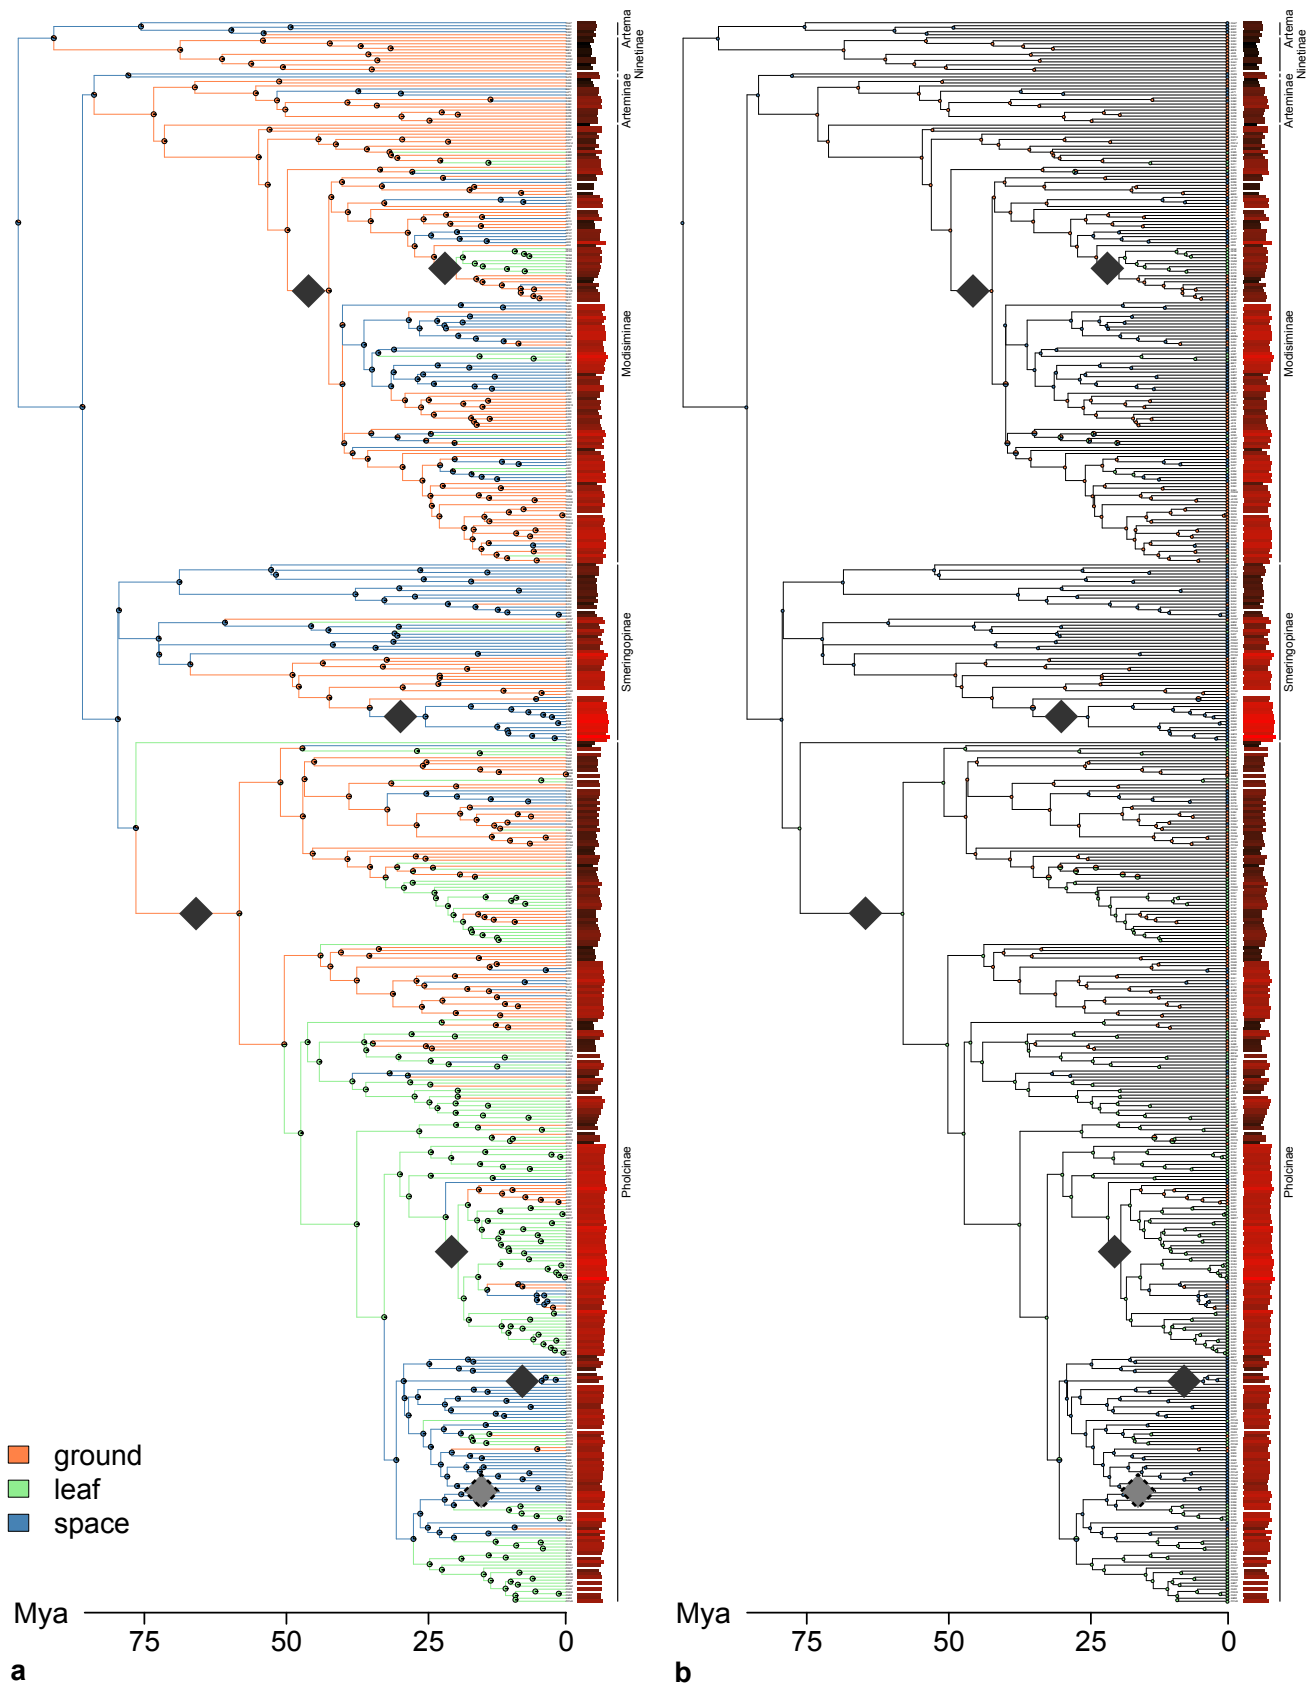

**Figure S12:** Time tree inferred with RelTime with ancestral states (a) inferred by maximum likelihood and (b) reconstructed by maximum parsimony. Pies at nodes in (a) depict ancestral state likelihoods while branch colors in code the most likely state. Pies at nodes in (b) give the most parsimonious state(s). Bars next to tips illustrate the ratio of metatarsus to tibia of the first leg which was used as a proxy of microhabitat. Diamonds show speciation rate shifts of the best fitting scenario inferred with BAMM. The light grey diamond was located on a branch which is not present in the current tree because no microhabitat preference data was available for the respective species (BAMM analyses did not use microhabitat information).

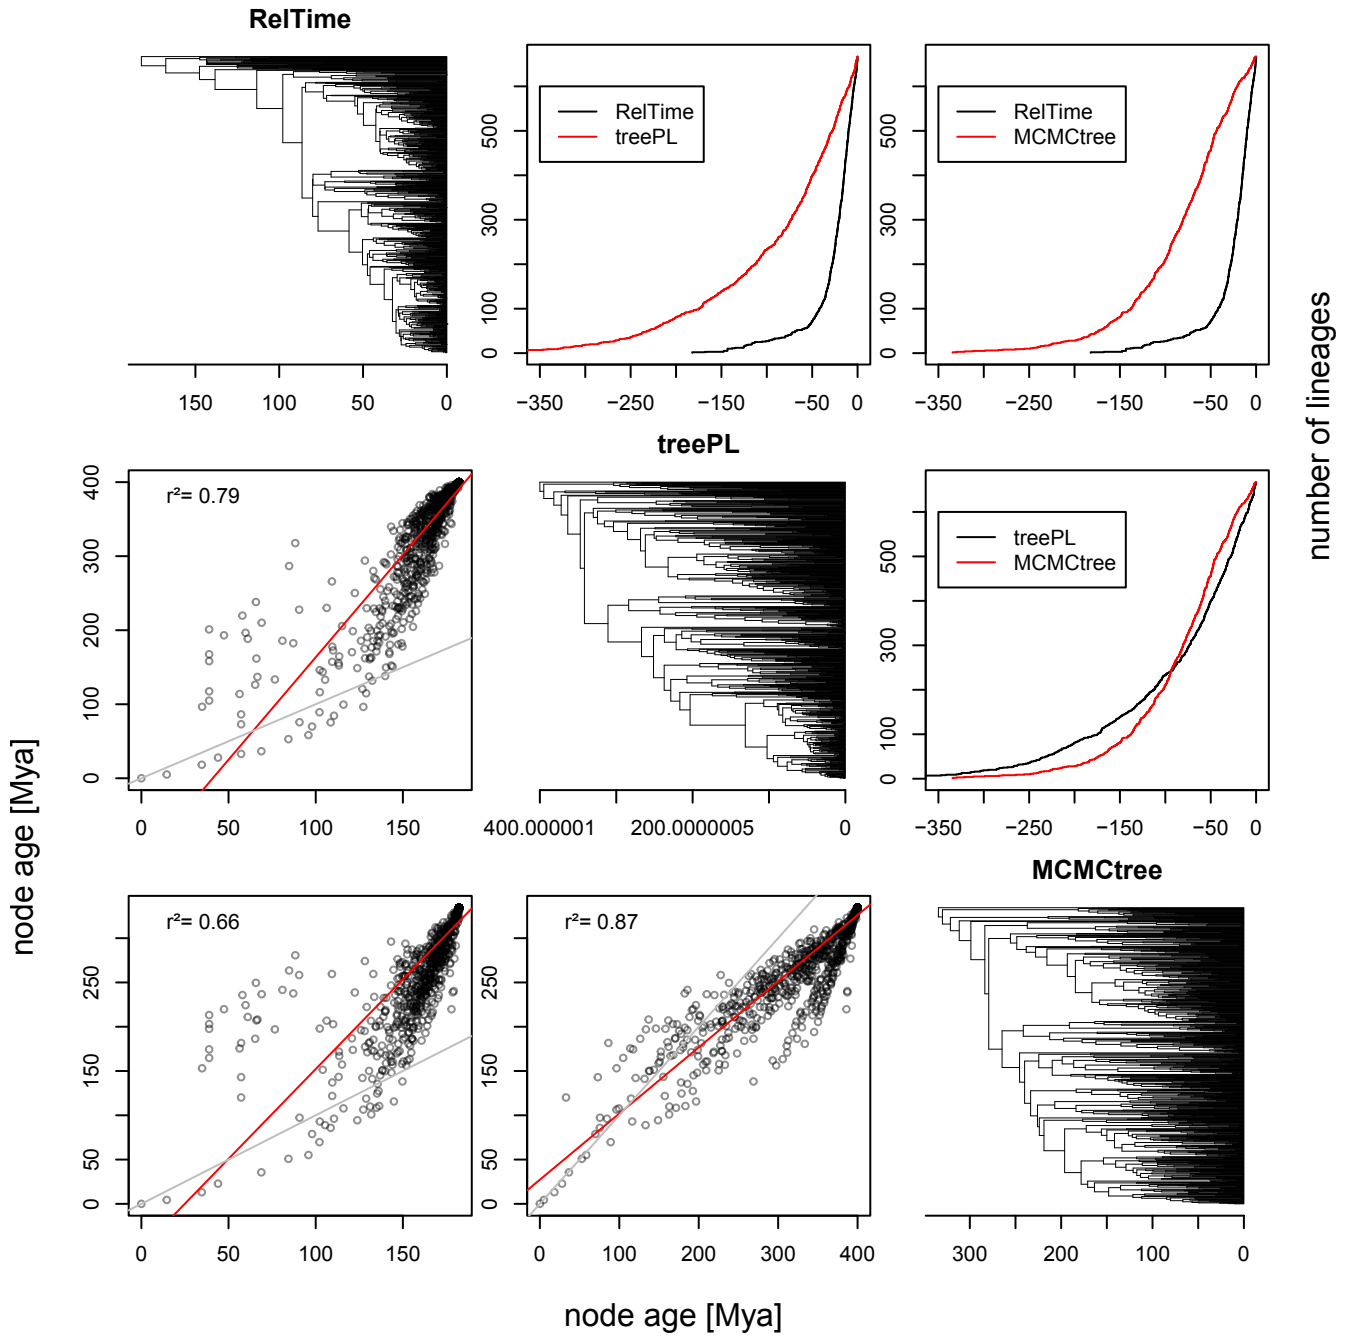

**Figure S13:** Comparison of divergence times inferred by the employed methods on the fixed topology of the most likely tree for the complete sampling (RAxML; Fig. S3). The lower triangle compares ages of each node. The red and grey lines are regression lines and the diagonal line (perfect match), respectively. The upper triangle compares lineages through time.

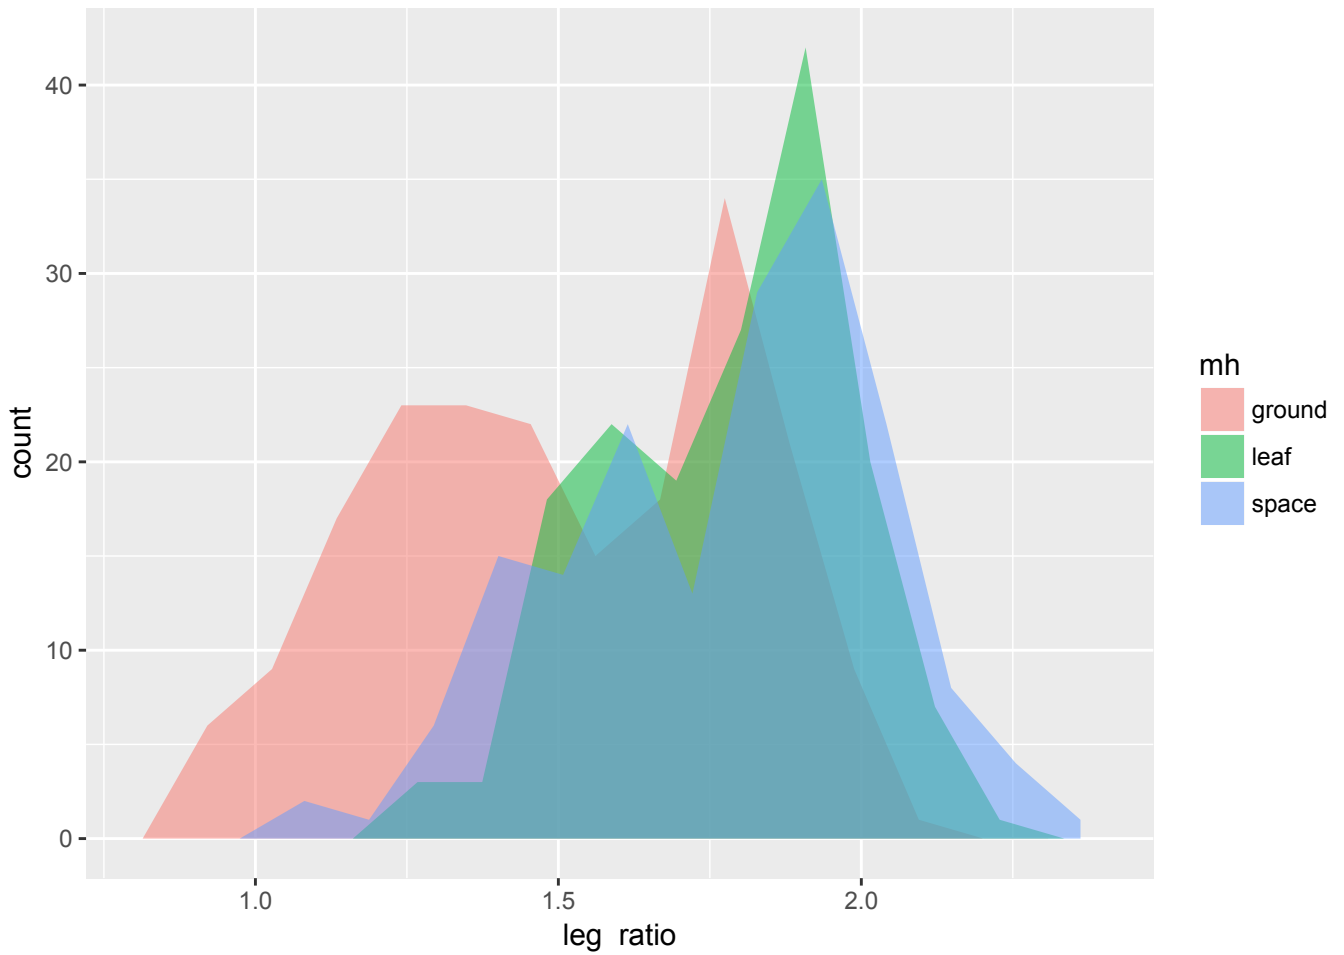

**Figure S14:** Distribution of the metatarsus to tibia ratio of the first leg by microhabitat. Leave dwellers and space living species appear to have higher ratios; however, bimodal distributions for all microhabitats might indicate also a phylogenetic component.

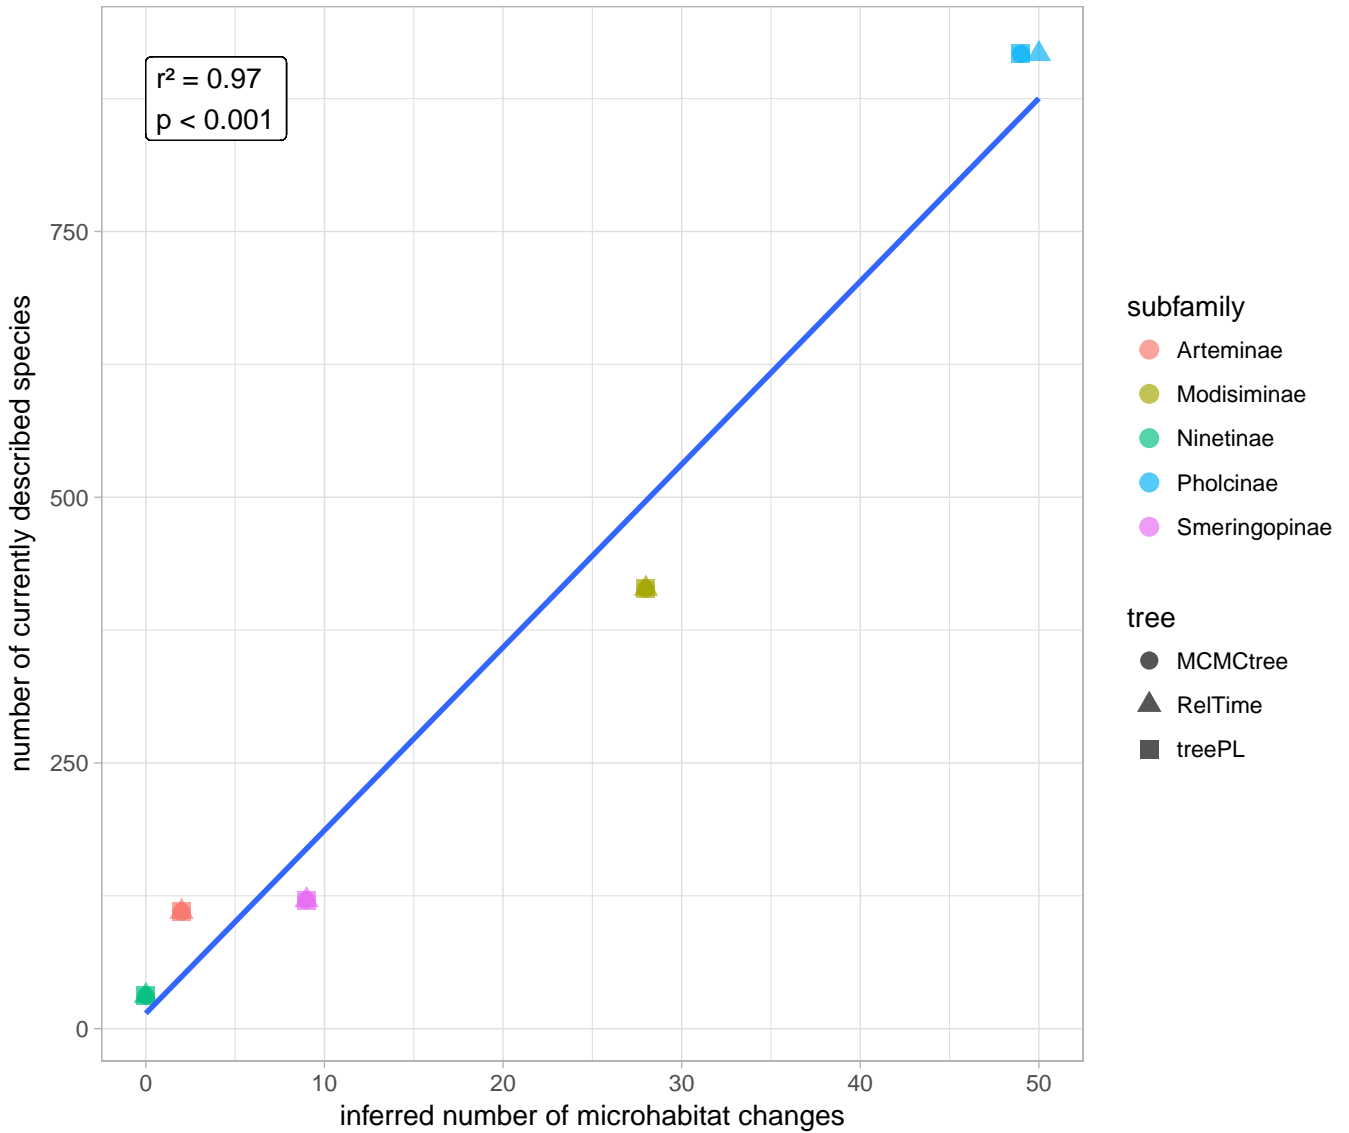

**Figure S15:** Number of microhabitat changes in subfamilies of pholcid spiders based on ancestral state inferences of all available time trees (complete sampling). Coefficient of determination and p-value of a linear regression are given in the upper left corner. The corresponding regression line is plotted in blue.

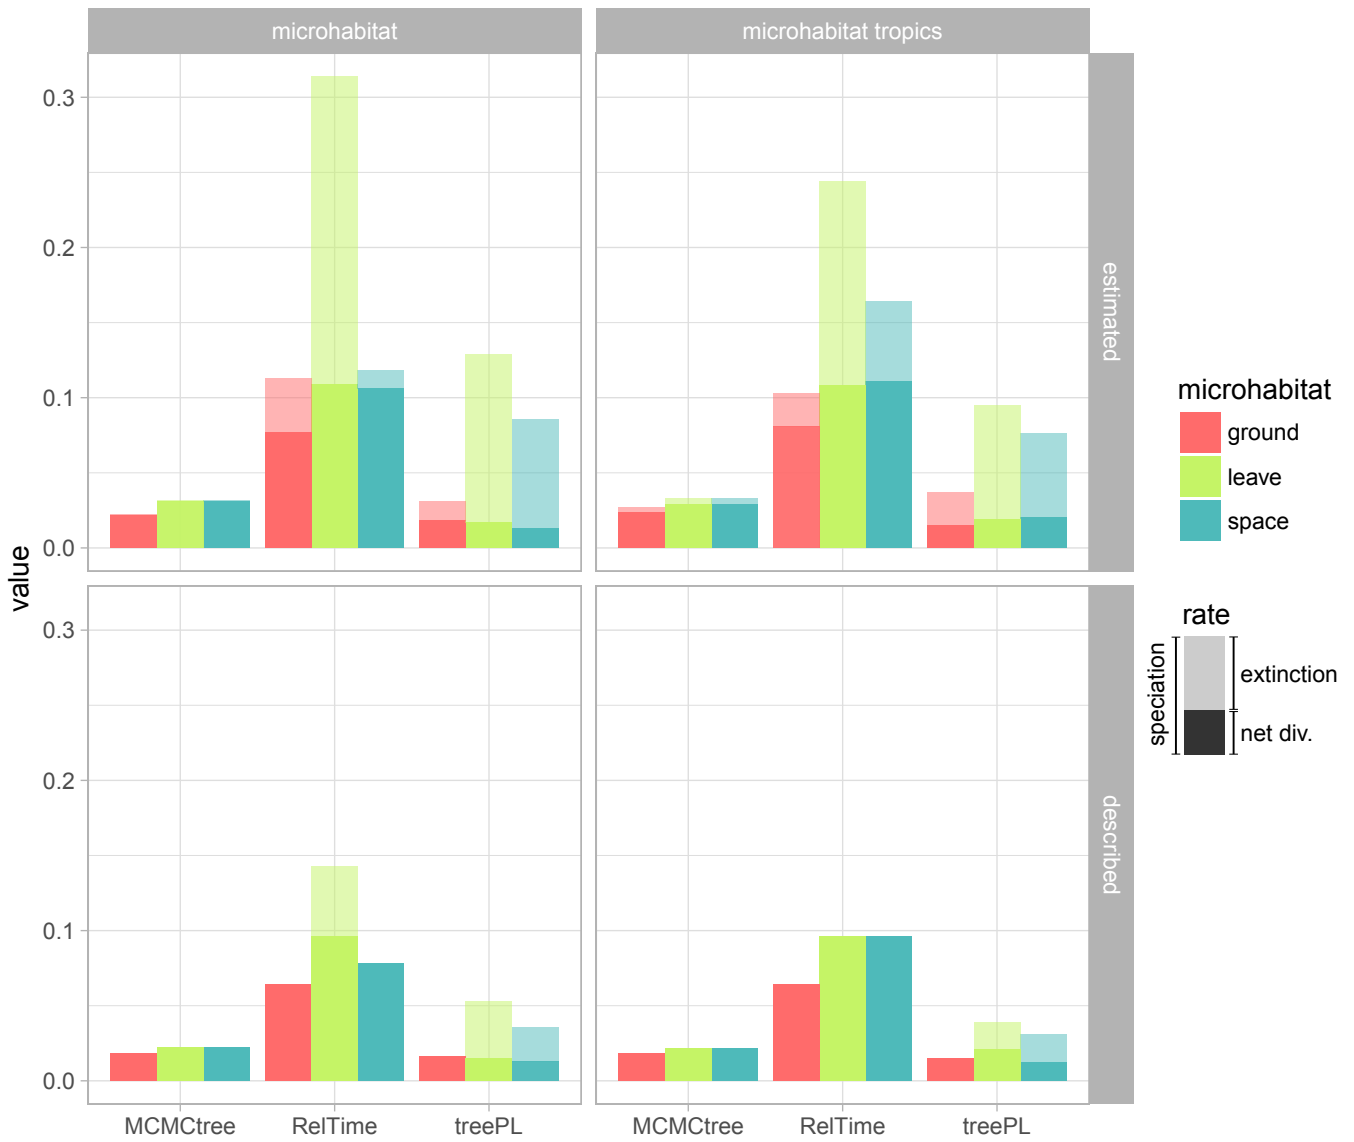

**Figure S16:** Diversification rates in dependence of microhabitat (inferred with MuSSE). Results based on currently described and of estimated species numbers are compared (rows) as well as rates inferred based on the complete sampling and based on species from tropical broad leaf forest only (columns).

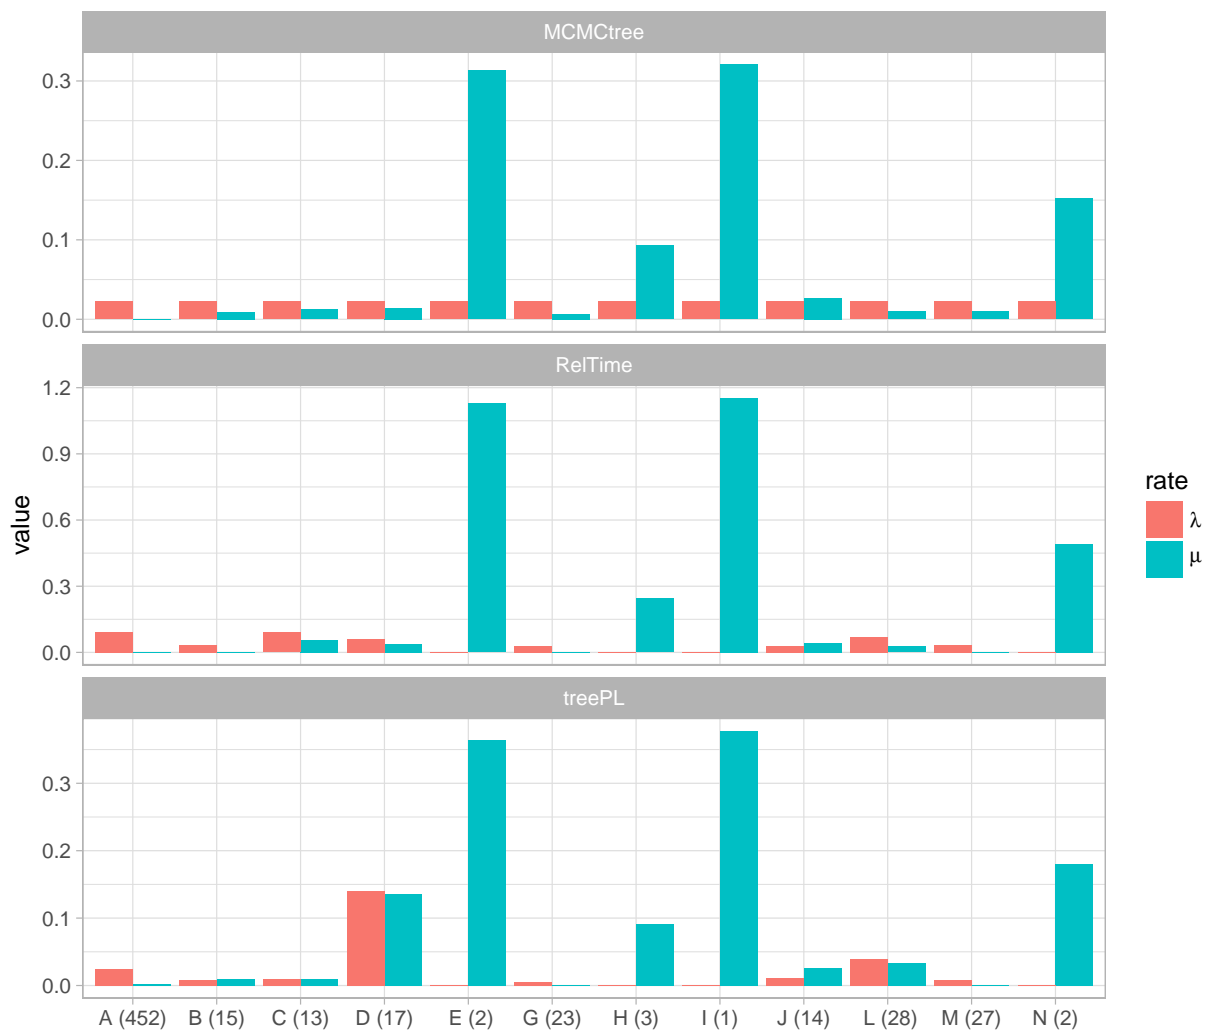

**Figure S17:** Diversification rates in dependence of biomes, inferred by MuSSE for all dated trees. Biomes are coded as follows:

- A = Tropical & Subtropical Moist Broadleaf Forests,
- B = Tropical & Subtropical Dry Broadleaf Forests,
- C = Tropical & Subtropical Coniferous Forests,
- D = Temperate Broadleaf & Mixed Forests,
- E = Temperate Conifer Forests,
- G = Tropical & Subtropical Grasslands, Savannas & Shrublands,
- H = Temperate Grasslands, Savannas & Shrublands,
- I = Flooded Grasslands & Savannas,
- J = Montane Grasslands & Shrublands,
- L = Mediterranean Forests, Woodlands & Scrub,
- M = Deserts & Xeric Shrublands,
- N = Mangroves.

Available specimen count per biome is given in parentheses at the x-axis.

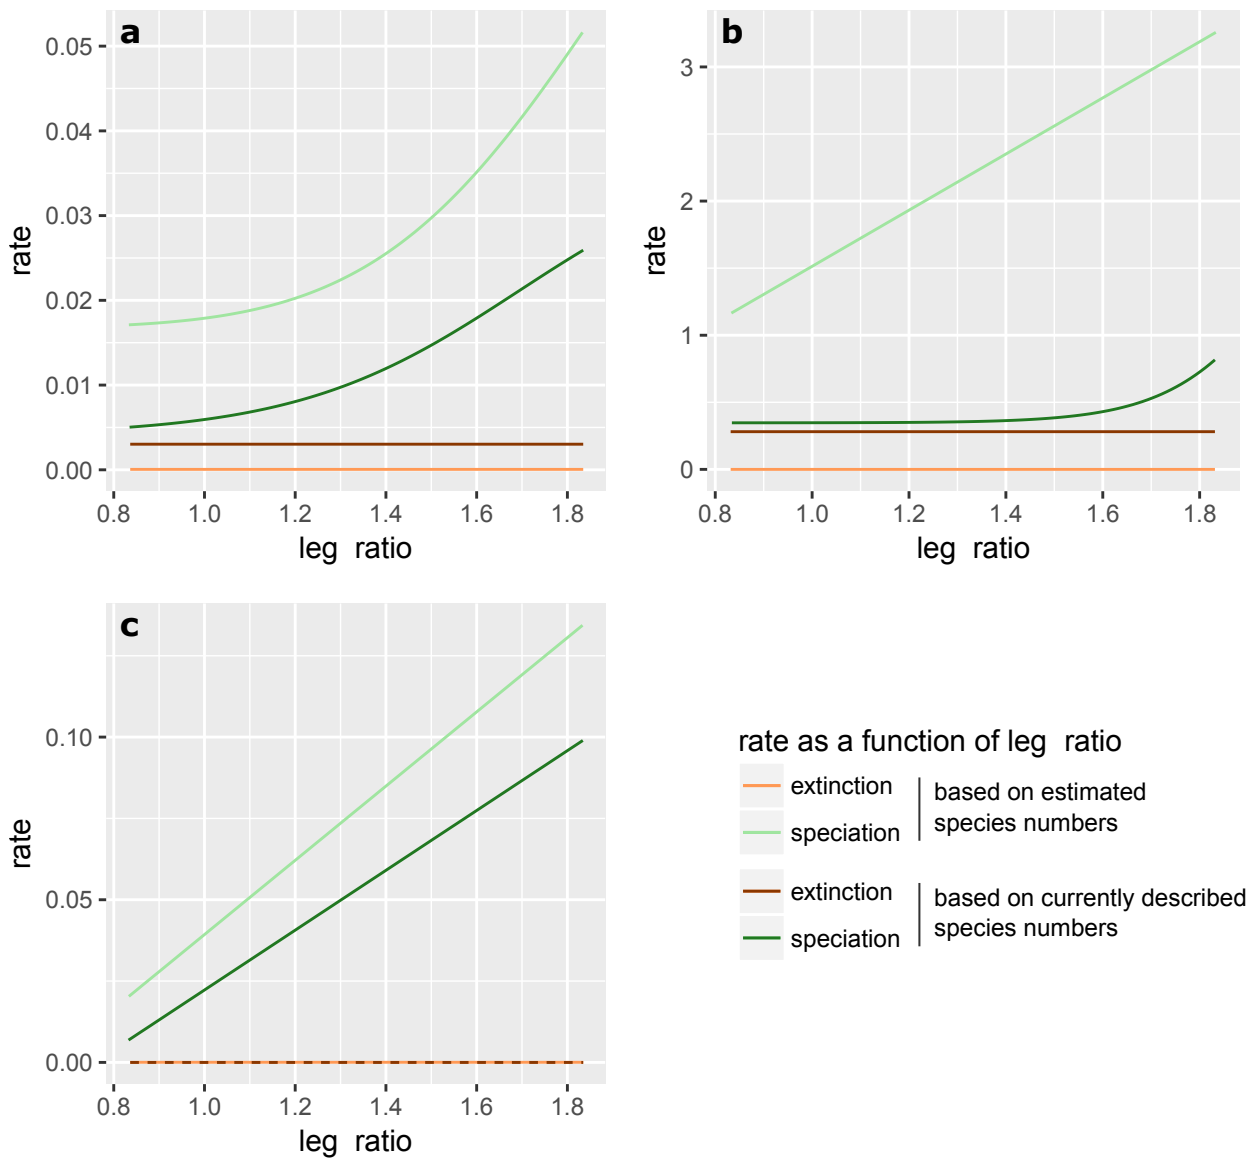

**Figure S18:** Diversification rates in dependence of the metatarsus to tibia ratio of the first leg (inferred with QuaSSE) using the dated tree resulting from (a) treePL, (b) MCMCtree, and (c) RelTime analyses.

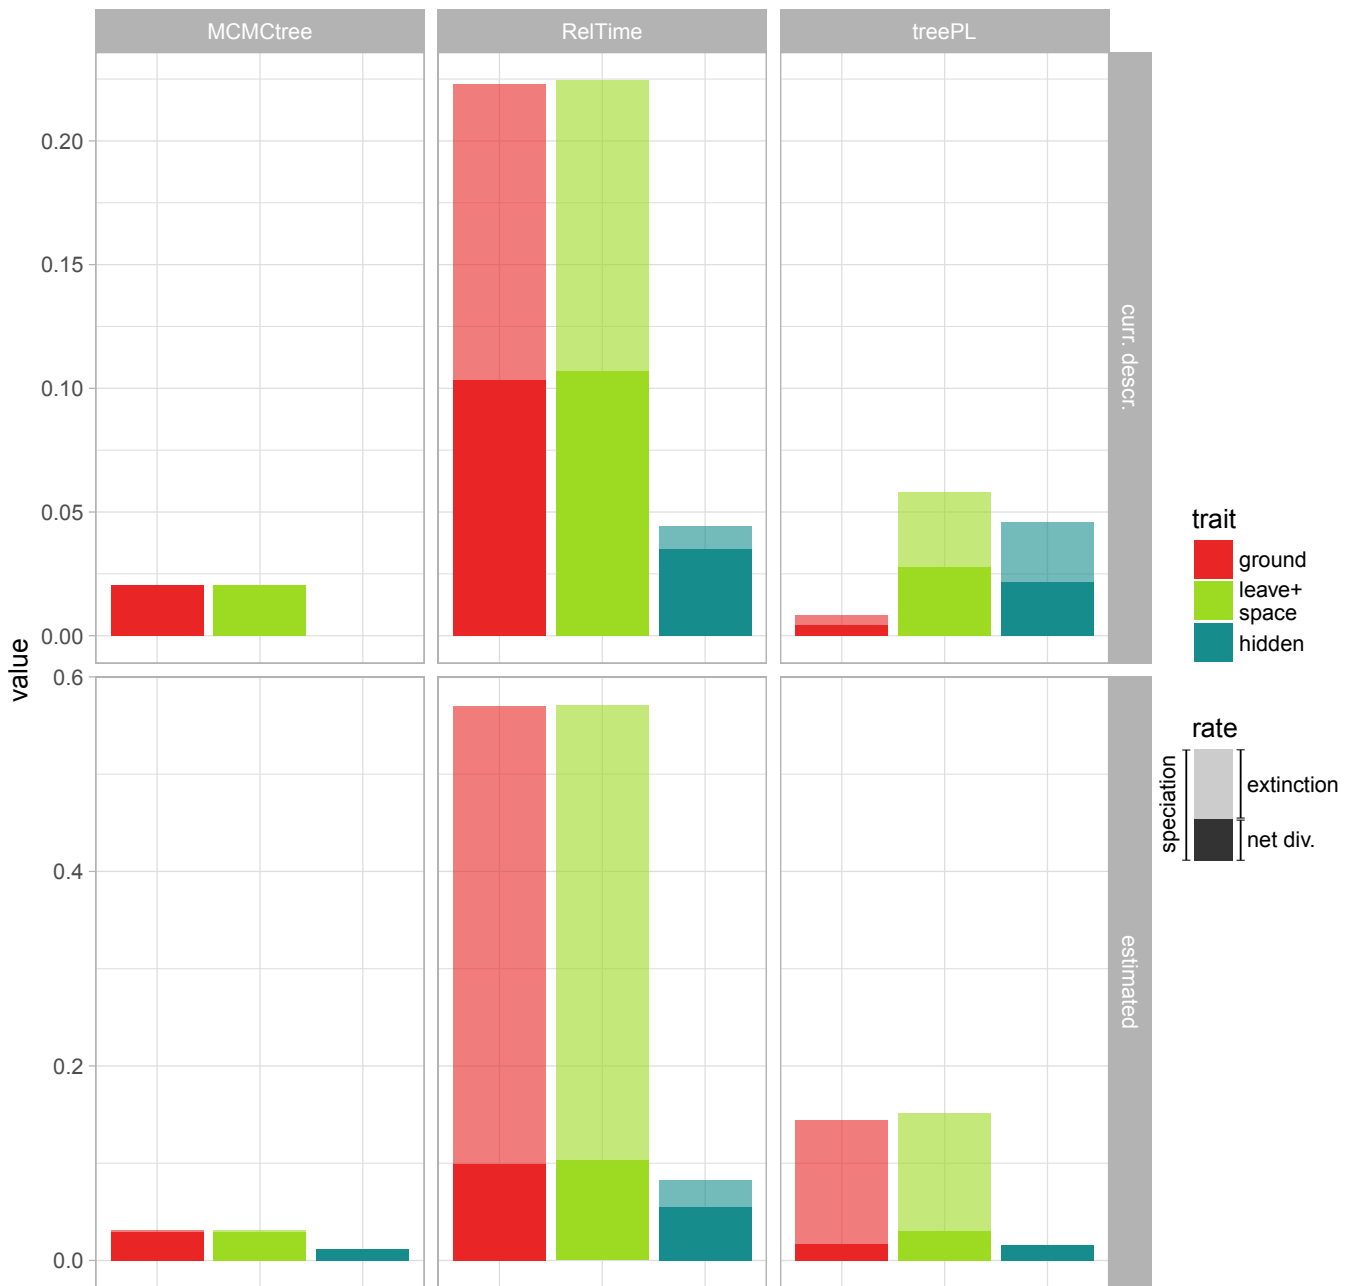

**Figure S19:** Diversification rates in dependence of microhabitat (inferred with HiSSE). Pooled leave- and space dwelling species were evaluated against ground living species. Results based on currently described and of estimated species numbers are compared (rows) among all dated trees (columns).



## 2 Supplementary Tables

**Table S1:** Table of accession numbers. The code which is also given in the trees, species names, GenBank accession numbers for all of the six loci if present, and ZFMK biobank accession numbers are given.

| code  | species                                | 12S      | 16S      | 18S      | 28S      | CO1      | H3       | biobank             |
|-------|----------------------------------------|----------|----------|----------|----------|----------|----------|---------------------|
| S067  | <i>Aetana abadae</i>                   |          |          | MG268047 | MG268374 |          | MG269086 | ZFMK-DNA-FD04784097 |
| S015  | <i>Aetana baganihan</i>                | MG267452 |          | MG268044 | MG268370 |          | MG269076 | ZFMK-DNA-FD04784085 |
| S075  | <i>Aetana banahaw</i>                  | MG267497 | MG267738 | MG268052 | MG268379 |          |          | ZFMK-DNA-FD04784153 |
| GB01  | <i>Aetana gaya</i>                     |          |          |          |          | MG268802 |          |                     |
| S330  | <i>Aetana Ind101</i>                   | MG267565 | MG267863 | MG268188 | MG268542 | MG268790 | MG269081 | ZFMK-DNA-FD04784318 |
| S331  | <i>Aetana Ind114</i>                   | MG267626 | MG267881 | MG268193 | MG268492 | MG268761 | MG269085 | ZFMK-DNA-FD04784326 |
| S119  | <i>Aetana indah</i>                    |          |          | MG268097 | MG268405 | MG268800 | MG269080 | ZFMK-DNA-FD04784131 |
| S117  | <i>Aetana kinabalu</i>                 | MG267498 |          | MG268095 | MG268403 |          | MG269117 | ZFMK-DNA-FD04784115 |
| S221  | <i>Aetana kiukoki</i>                  |          |          | MG268088 | MG268392 | MG268799 |          | ZFMK-DNA-FD04784158 |
| S223  | <i>Aetana kiukoki</i>                  | MG267476 |          | MG268089 | MG268394 | MG268798 |          | ZFMK-DNA-FD04784174 |
| GB04  | <i>Aetana lambir</i>                   |          |          |          |          | MG268801 |          |                     |
| S121  | <i>Aetana lambir</i>                   |          |          | MG268098 | MG268406 |          |          | ZFMK-DNA-FD04784139 |
| S080  | <i>Aetana libjo</i>                    |          |          |          | MG268371 |          | MG269075 | ZFMK-DNA-FD04784098 |
| GB31  | <i>Aetana loboc</i>                    |          |          |          |          | MG268793 |          |                     |
| S069  | <i>Aetana loboc</i>                    |          | MG267736 | MG268086 | MG268377 |          | MG269082 | ZFMK-DNA-FD04784113 |
| S077  | <i>Aetana lozadae</i>                  |          | MG267739 | MG268050 | MG268378 | MG268795 | MG269084 | ZFMK-DNA-FD04784074 |
| GB32  | <i>Aetana manansalai</i>               |          |          |          |          | MG268796 |          |                     |
| S073  | <i>Aetana manansalai</i>               |          | MG267737 | MG268051 | MG268381 |          | MG269083 | ZFMK-DNA-FD04784145 |
| GB70  | <i>Aetana</i><br><i>ocampoi-morphA</i> |          |          |          |          | MG268791 |          |                     |
| S007  | <i>Aetana</i><br><i>ocampoi-morphA</i> | MG267450 |          | MG268046 | MG268373 |          | MG269078 | ZFMK-DNA-FD04784116 |
| S008  | <i>Aetana</i><br><i>ocampoi-morphB</i> | MG267451 |          | MG268045 | MG268372 |          | MG269077 | ZFMK-DNA-FD04784124 |
| GB02  | <i>Aetana omayan</i>                   |          |          |          |          | MG268794 |          |                     |
| S001  | <i>Aetana omayan</i>                   | MG267464 | MG267735 | MG268048 | MG268375 |          | MG269087 | ZFMK-DNA-FD04784092 |
| S079  | <i>Aetana paragua</i>                  |          | MG267740 | MG268049 | MG268376 | MG268797 |          | ZFMK-DNA-FD04784090 |
| S118  | <i>Aetana poring</i>                   |          |          | MG268096 | MG268404 | MG268803 | MG269079 | ZFMK-DNA-FD04784123 |
| OG26  | <i>Agelenopsis aperta</i>              |          | FJ607444 | FJ607478 | FJ607517 | FJ607552 | FJ607591 |                     |
| S002  | <i>Anansus atewa</i>                   |          |          | MG268035 | MG268389 |          | MG268969 | ZFMK-DNA-FD04784100 |
| S286  | <i>Anansus ewe</i>                     | MG267543 |          | MG268152 | MG268466 | MG268874 |          | ZFMK-DNA-FD04784179 |
| P0190 | <i>Anansus kamwai</i>                  | JX023799 |          | JX023985 | JX024092 | JX023572 |          | ZFMK-DNA-100446434  |
| S309  | <i>Anopsicus Car127</i>                |          | MG267843 | MG268186 | MG268481 | MG268693 |          | ZFMK-DNA-FD04784253 |
| S310  | <i>Anopsicus Car206</i>                | MG267564 | MG267862 | MG268187 | MG268482 |          | MG269022 | ZFMK-DNA-FD04784261 |
| S413  | <i>Anopsicus USA3</i>                  | MG267645 | MG267936 |          | MG268545 | MG268677 |          | ZFMK-DNA-FD04784405 |
| OG7   | <i>Araneus diadematus</i>              |          | FJ607445 | FJ607479 | FJ607518 | FJ607553 | FJ607592 |                     |
| OG34  | <i>Argiope argentata</i>               |          | FJ607446 | FJ607480 | FJ607519 | FJ607554 | FJ607593 |                     |
| OG6   | <i>Ariadna fidicina</i>                |          | FJ607447 | FJ607481 | FJ607520 | FJ607555 | FJ607594 |                     |
| BB01  | <i>Artema atlanta</i>                  | AY560685 |          | AY560663 |          | AY560771 |          |                     |
| JA119 | <i>Artema atlanta</i>                  |          | DQ667748 |          |          | DQ667854 |          | ZFMK-DNA-FC17941390 |
| S312  | <i>Artema bunkpurugu</i>               |          | MG267845 | MG268183 |          | MG268734 |          | ZFMK-DNA-FD04784277 |
| S326  | <i>Artema doriai</i>                   |          | MG267860 | MG268185 |          | MG268738 |          | ZFMK-DNA-FD04784294 |
| GB03  | <i>Artema nephilit</i>                 |          |          |          |          | MG268733 |          |                     |
| S325  | <i>Artema nephilit</i>                 |          | MG267859 | MG268184 |          |          |          | ZFMK-DNA-FD04784286 |
| S497  | <i>Artema Om14</i>                     | MG267717 | MG268005 | MG268334 | MG268598 | MG268735 |          | ZFMK-DNA-FD05101751 |
| S235  | <i>Artema sp.C</i>                     |          | MG267783 |          |          | MG268736 |          | ZFMK-DNA-FD04784175 |
| S287  | <i>Artema sp.C</i>                     |          | MG267823 | MG268182 |          | MG268737 |          | ZFMK-DNA-FD04784187 |
| S332  | <i>Artema transcaspica</i>             | MG267589 | MG267864 | MG268244 |          | MG268739 |          | ZFMK-DNA-FD04784334 |
| OG4   | <i>Austrochilus sp</i>                 |          |          | FJ607483 | FJ607522 | FJ607557 | FJ607596 |                     |
| S414  | <i>Aymaria Br16-188</i>                | MG267646 | MG268004 | MG268261 | MG268546 | MG268805 | MG268984 | ZFMK-DNA-FD04784413 |
| P0231 | <i>Belisana akebona</i>                | JX023821 | JX023915 | JX024018 |          |          | JX023678 | ZFMK-DNA-100446379  |
| S238  | <i>Belisana aninaj</i>                 |          |          | MG268121 | MG268432 |          |          | ZFMK-DNA-FD04784199 |
| S415  | <i>Belisana aninaj</i>                 | MG267647 |          |          | MG268588 | MG268876 |          | ZFMK-DNA-FD04784421 |
| S230  | <i>Belisana australis</i>              | MG267472 |          | MG268091 | MG268399 | MG268868 | MG269096 | ZFMK-DNA-FD04784230 |
| S333  | <i>Belisana bohorok</i>                | MG267627 | MG267888 | MG268197 |          | MG268686 | MG269097 | ZFMK-DNA-FD04784342 |
| S125  | <i>Belisana Bor121</i>                 |          |          | MG268100 | MG268407 | MG268766 | MG269109 | ZFMK-DNA-FD04784155 |
| S243  | <i>Belisana Bor121</i>                 | MG267511 | MG267789 | MG268125 | MG268436 |          | MG269108 | ZFMK-DNA-FD04784231 |
| S126  | <i>Belisana Bor147</i>                 |          |          | MG268101 | MG268408 |          |          | ZFMK-DNA-FD04784156 |
| S127  | <i>Belisana Bor152</i>                 |          | MG267786 | MG268102 | MG268409 | MG268627 | MG269100 | ZFMK-DNA-FD04784164 |
| S128  | <i>Belisana Bor160</i>                 |          | MG267787 | MG268103 |          |          | MG269102 | ZFMK-DNA-FD04784172 |
| S129  | <i>Belisana Bor85</i>                  | MG267499 | MG267788 |          |          |          | MG269101 | ZFMK-DNA-FD04784180 |
| S334  | <i>Belisana Ind15</i>                  | MG267628 | MG267883 | MG268198 |          | MG268636 | MG269098 | ZFMK-DNA-FD04784255 |
| S237  | <i>Belisana jumboae</i>                | MG267468 |          | MG268094 | MG268474 |          |          | ZFMK-DNA-FD04784191 |
| S239  | <i>Belisana ketambe?</i>               | MG267508 |          | MG268122 | MG268433 |          |          | ZFMK-DNA-FD04784207 |
| S025  | <i>Belisana Benj44</i>                 | MG267449 | MG267742 | MG268070 |          |          | MG269095 | ZFMK-DNA-FD04784062 |
| S241  | <i>Belisana khaoyai</i>                | MG267509 |          | MG268123 | MG268434 |          | MG269104 | ZFMK-DNA-FD04784215 |
| S242  | <i>Belisana leuser</i>                 | MG267510 |          | MG268124 | MG268435 | MG268833 | MG269103 | ZFMK-DNA-FD04784223 |
| S244  | <i>Belisana Mal30</i>                  | MG267512 |          | MG268126 |          | MG268825 |          | ZFMK-DNA-FD04784239 |

| code  | species                        | 12S      | 16S      | 18S      | 28S      | CO1      | H3       | biobank             |
|-------|--------------------------------|----------|----------|----------|----------|----------|----------|---------------------|
| S416  | <i>Belisana Mal35</i>          | MG267648 | MG267937 | MG268262 | MG268547 |          |          | ZFMK-DNA-FD04784429 |
| S246  | <i>Belisana Mal55</i>          |          | MG267790 | MG268127 | MG268437 |          |          | ZFMK-DNA-FD04784247 |
| S247  | <i>Belisana Mal76</i>          | MG267513 | MG267791 |          | MG268438 | MG268823 |          | ZFMK-DNA-FD04784160 |
| S248  | <i>Belisana Mal77</i>          | MG267514 | MG267792 | MG268128 | MG268439 | MG268731 | MG269094 | ZFMK-DNA-FD04784168 |
| S249  | <i>Belisana Mal91</i>          | MG267515 | MG267793 | MG268129 |          | MG268623 |          | ZFMK-DNA-FD04784176 |
| S336  | <i>Belisana nahtanoj</i>       | MG267632 | MG267884 | MG268199 | MG268494 | MG268767 | MG269105 | ZFMK-DNA-FD04784271 |
| S219  | <i>Belisana Phi80</i>          | MG267478 |          |          | MG268391 |          | MG269099 | ZFMK-DNA-FD04784245 |
| P0282 | <i>Belisana Raff32</i>         |          | JX023946 | JX024058 |          |          | JX023708 | ZFMK-DNA-100437888  |
| S417  | <i>Belisana ranong</i>         | MG267649 |          | MG268263 | MG268548 | MG268804 | MG269093 | ZFMK-DNA-FD04784437 |
| S386  | <i>Belisana sabah</i>          | MG267612 | MG267901 | MG268240 | MG268520 | MG268765 | MG269107 | ZFMK-DNA-FD04784291 |
| S337  | <i>Belisana sandakan</i>       | MG267588 |          | MG268189 | MG268487 |          |          | ZFMK-DNA-FD04784279 |
| S498  | <i>Belisana SL37</i>           |          | MG268006 | MG268335 |          | MG268676 |          | ZFMK-DNA-FD05101759 |
| S103  | <i>Belisana Tai4</i>           | MG267484 |          | MG268109 |          | MG268904 |          | ZFMK-DNA-FD04784122 |
| S338  | <i>Belisana tambligan</i>      | MG267633 | MG267885 | MG268200 | MG268495 | MG268764 | MG269106 | ZFMK-DNA-FD04784287 |
| P0267 | <i>Buitinga batwa</i>          | JX023838 | JX023934 | JX024046 | JX024138 |          | JX023698 | ZFMK-DNA-100437896  |
| S339  | <i>Buitinga buhoma</i>         | MG267629 | MG267886 | MG268208 | MG268505 | MG268952 | MG269072 | ZFMK-DNA-FD04784295 |
| P0259 | <i>Buitinga griswoldi</i>      | JX023834 |          | JX024040 | JX024134 |          | JX023690 | ZFMK-DNA-100437913  |
| P0191 | <i>Buitinga nigrescens?</i>    |          | JX023885 | JX023986 | JX024093 | JX023573 |          | ZFMK-DNA-100446422  |
| S340  | <i>Buitinga ruhiza</i>         | MG267630 |          | MG268209 | MG268506 | MG268953 |          | ZFMK-DNA-FD04784303 |
| S341  | <i>Buitinga ruwenzori</i>      | MG267631 | MG267887 | MG268210 |          | MG268954 | MG269071 | ZFMK-DNA-FD04784311 |
| S483  | <i>Buitinga Uga5</i>           | MG267702 |          | MG268321 | MG268581 | MG268955 | MG269073 | ZFMK-DNA-FD04784387 |
| S484  | <i>Buitinga Uga78</i>          | MG267703 |          | MG268322 | MG268582 | MG268956 | MG269074 | ZFMK-DNA-FD04784395 |
| P0156 | <i>Buitinga wataita</i>        | JX023769 | JX023862 | JX023959 | JX024072 | JX023552 |          | ZFMK-DNA-100446448  |
| S251  | <i>Calapnita anai</i>          | MG267516 | MG267794 |          |          |          |          | ZFMK-DNA-FD04784184 |
| S418  | <i>Calapnita bankirai</i>      | MG267650 | MG267938 | MG268264 |          | MG268923 |          | ZFMK-DNA-FD04784350 |
| S419  | <i>Calapnita bario</i>         | MG267651 | MG267939 |          |          | MG268849 |          | ZFMK-DNA-FD04784358 |
| S420  | <i>Calapnita bidayuh</i>       | MG267652 | MG267940 | MG268265 |          | MG268924 |          | ZFMK-DNA-FD04784366 |
| S421  | <i>Calapnita bohol</i>         | MG267653 | MG267941 | MG268266 | MG268549 | MG268854 |          | ZFMK-DNA-FD04784374 |
| S133  | <i>Calapnita deelemanae</i>    | MG267500 |          |          |          |          | MG269164 | ZFMK-DNA-FD04784188 |
| S485  | <i>Calapnita dinagat</i>       | MG267704 | MG267991 | MG268323 | MG268583 | MG268851 |          | ZFMK-DNA-FD04784403 |
| S184  | <i>Calapnita kubah</i>         |          |          |          |          | MG268920 | MG269165 | ZFMK-DNA-FD04784197 |
| S136  | <i>Calapnita lehi</i>          | MG267503 |          |          |          | MG268919 | MG269163 | ZFMK-DNA-FD04784212 |
| S422  | <i>Calapnita loksado</i>       | MG267654 | MG267942 | MG268267 | MG268550 | MG268853 |          | ZFMK-DNA-FD04784382 |
| S227  | <i>Calapnita nunezae</i>       |          |          | MG268090 | MG268397 | MG268850 |          | ZFMK-DNA-FD04784206 |
| S134  | <i>Calapnita phyllicola</i>    | MG267501 |          |          |          | MG268922 |          | ZFMK-DNA-FD04784196 |
| S252  | <i>Calapnita saluang</i>       | MG267517 |          | MG268130 | MG268440 |          |          | ZFMK-DNA-FD04784192 |
| GB33  | <i>Calapnita semengoh</i>      |          |          |          |          | MG268921 |          |                     |
| S135  | <i>Calapnita semengoh</i>      | MG267502 |          |          |          |          | MG269162 | ZFMK-DNA-FD04784204 |
| S229  | <i>Calapnita subphyllicola</i> |          | MG267800 |          |          | MG268918 |          | ZFMK-DNA-FD04784222 |
| S076  | <i>Calapnita vermiformis</i>   |          |          |          | MG268380 |          |          | ZFMK-DNA-FD04784066 |
| S424  | <i>Calapnita vermiformis?</i>  | MG267655 | MG267943 | MG268268 | MG268551 | MG268852 |          | ZFMK-DNA-FD04784390 |
| OG37  | <i>Callobius sp</i>            |          | FJ607450 | FJ607485 | FJ607524 | FJ607559 | FJ607598 |                     |
| S344  | <i>Carapoia alagoas</i>        | MG267566 | MG267865 | MG268190 | MG268488 | MG268784 | MG269039 | ZFMK-DNA-FD04784335 |
| S352  | <i>Carapoia Br15-15</i>        | MG267567 | MG267866 | MG268191 | MG268489 | MG268744 | MG269025 | ZFMK-DNA-FD04784304 |
| S455  | <i>Carapoia Br15-18</i>        |          |          | MG268296 | MG268594 | MG268656 | MG269029 | ZFMK-DNA-FD04784353 |
| S392  | <i>Carapoia Br15-48</i>        | MG267622 | MG267907 | MG268239 | MG268516 | MG268778 | MG269027 | ZFMK-DNA-FD04784339 |
| S354  | <i>Carapoia Br15-62</i>        | MG267639 | MG267893 | MG268205 | MG268501 | MG268782 | MG269050 | ZFMK-DNA-FD04784320 |
| S394  | <i>Carapoia Br15-78</i>        | MG267592 | MG267918 | MG268213 | MG268522 | MG268768 |          | ZFMK-DNA-FD04784348 |
| S393  | <i>Carapoia Br15-79</i>        | MG267623 | MG267908 | MG268238 | MG268517 | MG268777 | MG269028 | ZFMK-DNA-FD04784347 |
| S428  | <i>Carapoia Br16-58</i>        | MG267659 | MG267947 | MG268333 | MG268554 | MG268770 | MG269051 | ZFMK-DNA-FD04784422 |
| S429  | <i>Carapoia Br16-67</i>        | MG267660 | MG267948 | MG268271 | MG268555 | MG268779 | MG269026 | ZFMK-DNA-FD04784430 |
| S425  | <i>Carapoia Br16-73</i>        | MG267656 | MG267944 | MG268269 | MG268552 | MG268769 | MG269049 | ZFMK-DNA-FD04784398 |
| S035  | <i>Carapoia brescoviti</i>     | MG267433 | MG267743 | MG268059 | MG268360 |          | MG269041 | ZFMK-DNA-FD04784142 |
| GB34  | <i>Carapoia capizaba</i>       |          |          |          |          | MG268776 |          |                     |
| S027  | <i>Carapoia capizaba</i>       | MG267494 | MG267747 | MG268087 | MG268354 |          | MG269035 | ZFMK-DNA-FD04784078 |
| S345  | <i>Carapoia carvalhoi</i>      | MG267636 | MG267892 | MG268204 | MG268499 | MG268786 | MG269042 | ZFMK-DNA-FD04784343 |
| S040  | <i>Carapoia carybei</i>        | MG267429 | MG267746 | MG268057 |          | MG268772 | MG269044 | ZFMK-DNA-FD04784087 |
| S346  | <i>Carapoia crasto</i>         | MG267637 | MG267891 | MG268206 | MG268498 | MG268789 | MG269037 | ZFMK-DNA-FD04784256 |
| GB05  | <i>Carapoia dandarae</i>       |          |          |          |          | MG268757 |          |                     |
| S033  | <i>Carapoia dandarae</i>       |          | MG267753 | MG268056 | MG268356 |          | MG269047 | ZFMK-DNA-FD04784126 |
| P0209 | <i>Carapoia divisa</i>         | JX023809 | JX023900 |          | JX024108 | JX023585 | JX023660 | ZFMK-DNA-100446405  |
| S426  | <i>Carapoia fowleri</i>        | MG267657 | MG267945 |          | MG268589 | MG268780 | MG269023 | ZFMK-DNA-FD04784406 |
| P0205 | <i>Carapoia genitilis</i>      | JX023807 | JX023897 | JX023997 | JX024105 | JX023582 | JX023656 | ZFMK-DNA-100446401  |
| GB35  | <i>Carapoia gracilis</i>       |          |          |          |          | MG268773 |          |                     |
| S030  | <i>Carapoia gracilis</i>       |          | MG267751 | MG268063 |          |          | MG269031 | ZFMK-DNA-FD04784102 |
| S343  | <i>Carapoia jiboja</i>         | MG267638 | MG267890 | MG268203 | MG268497 | MG268755 | MG269045 | ZFMK-DNA-FD04784327 |
| P0206 | <i>Carapoia macacu</i>         |          | JX023898 | JX023998 |          | JX023583 | JX023657 | ZFMK-DNA-100446402  |
| P0207 | <i>Carapoia macacu</i>         |          | JX023899 | JX023999 | JX024106 |          | JX023658 | ZFMK-DNA-100446403  |
| S037  | <i>Carapoia marceloi</i>       | MG267428 | MG267754 | MG268055 | MG268355 | MG268756 | MG269046 | ZFMK-DNA-FD04784063 |
| S026  | <i>Carapoia mirim</i>          |          | MG267749 | MG268060 | MG268357 | MG268774 | MG269032 | ZFMK-DNA-FD04784070 |
| P0211 | <i>Carapoia nairae</i>         | JX023811 |          |          |          | JX023587 | JX023662 | ZFMK-DNA-100446407  |
| S427  | <i>Carapoia ocaina</i>         | MG267658 | MG267946 | MG268270 | MG268553 | MG268781 | MG269024 | ZFMK-DNA-FD04784414 |
| BB02  | <i>Carapoia paraguensis</i>    | AY560723 | AY560680 |          |          | AY560771 |          |                     |
| JA97  | <i>Carapoia paraguensis</i>    |          | DQ667749 |          | DQ667839 | DQ667855 |          | ZFMK-DNA-FC17941404 |
| S028  | <i>Carapoia patafina</i>       |          | MG267748 | MG268085 | MG268358 | MG268775 | MG269033 | ZFMK-DNA-FD04784086 |

| code  | species                           | 12S      | 16S      | 18S      | 28S      | CO1      | H3       | biobank             |
|-------|-----------------------------------|----------|----------|----------|----------|----------|----------|---------------------|
| S029  | <i>Carapoia pau</i>               | MG267495 | MG267750 | MG268064 |          |          | MG269030 | ZFMK-DNA-FD04784094 |
| S031  | <i>Carapoia rheimsae</i>          | MG267431 | MG267744 | MG268061 | MG268361 | MG268788 | MG269036 | ZFMK-DNA-FD04784110 |
| S288  | <i>Carapoia RJ16</i>              | MG267544 | MG267824 | MG268153 | MG268467 | MG268787 | MG269034 | ZFMK-DNA-FD04784195 |
| S342  | <i>Carapoia septentrionalis</i>   | MG267635 | MG267889 | MG268202 | MG268496 | MG268785 | MG269040 | ZFMK-DNA-FD04784319 |
| JA102 | <i>Carapoia ubatuba</i>           |          | DQ667750 |          | DQ667840 | DQ667856 |          | ZFMK-DNA-FC17941444 |
| S036  | <i>Carapoia una</i>               | MG267427 | MG267755 | MG268054 |          | MG268758 | MG269048 | ZFMK-DNA-FD04784150 |
| S038  | <i>Carapoia viridis</i>           | MG267430 | MG267745 | MG268062 | MG268353 | MG268783 | MG269038 | ZFMK-DNA-FD04784071 |
| P0208 | <i>Carapoia voltavelha</i>        | JX023808 |          | JX024000 | JX024107 | JX023584 | JX023659 | ZFMK-DNA-100446404  |
| S034  | <i>Carapoia zumbii</i>            | MG267432 | MG267752 | MG268058 | MG268359 | MG268680 | MG269043 | ZFMK-DNA-FD04784134 |
| S060  | <i>Chibchea mapuche?</i>          | MG267436 |          | MG268074 | MG268363 |          |          | ZFMK-DNA-FD04784144 |
| S058  | <i>Chibchea picunche?</i>         | MG267435 |          | MG268073 | MG268362 |          |          | ZFMK-DNA-FD04784128 |
| S430  | <i>Chisosa diluta</i>             | MG267661 |          | MG268272 | MG268556 | MG268626 |          | ZFMK-DNA-FD04784438 |
| BB03  | <i>Ciboneya antraia</i>           | AY560687 | AY560665 |          | AY560732 | AY560794 |          |                     |
| S313  | <i>Ciboneya nuriae</i>            |          | MG267846 |          |          |          |          | ZFMK-DNA-FD04784285 |
| S289  | <i>'Coryssocnemis' iviei</i>      | MG267545 | MG267825 | MG268154 | MG268468 | MG268619 | MG269147 | ZFMK-DNA-FD04784203 |
| JA100 | <i>Coryssocnemis simla</i>        |          | DQ667753 |          |          | DQ667858 |          | ZFMK-DNA-FC17941428 |
| JA107 | <i>Coryssocnemis simla</i>        | MG267466 | DQ667752 |          |          | DQ667859 |          | ZFMK-DNA05-JA107    |
| P0154 | <i>Crossopriza lyoni</i>          | JX023767 | JX023860 | JX023957 | JX024070 | JX023551 | JX023619 | ZFMK-DNA-100446459  |
| SB026 | <i>Crossopriza lyoni</i>          | MG267734 |          |          |          | MG268895 |          |                     |
| S499  | <i>Crossopriza Om16</i>           | MG267718 | MG268017 | MG268336 | MG268599 | MG268821 | MG269116 | ZFMK-DNA-FD05101767 |
| S500  | <i>Crossopriza Om20</i>           | MG267719 | MG268007 | MG268337 | MG268600 | MG268820 | MG269115 | ZFMK-DNA-FD05101775 |
| S290  | <i>Crossopriza pristina</i>       | MG267546 | MG267826 | MG268155 | MG268469 | MG268894 |          | ZFMK-DNA-FD04784211 |
| OG9   | <i>Deinopsis spinosa</i>          |          | FJ525351 | FJ525388 | FJ525370 | FJ525318 | FJ525337 |                     |
| OG35  | <i>Diguettia sp</i>               | AY560724 | AY560681 |          | AY560766 | AY560795 |          |                     |
| OG20  | <i>Dysdera erythrina-fervida</i>  |          | GQ285606 |          | GQ285615 | GQ285630 | GQ285625 |                     |
| OG19  | <i>Dysderocrates silvestris</i>   |          | AF244151 |          |          | AF244236 | EU139755 |                     |
| OG22  | <i>Erigone dentosa</i>            |          |          | FJ607489 | FJ607628 | FJ607563 |          |                     |
| OG1   | <i>Euagrus chisoseus</i>          |          | FJ607454 | FJ607490 | FJ607529 | FJ607564 | FJ607602 |                     |
| S323  | <i>Gen. Cu12-325</i>              |          | MG267855 | MG268178 |          |          |          | ZFMK-DNA-FD04784270 |
| S329  | <i>Gen.n. Br15-159</i>            |          | MG267861 | MG268180 | MG268486 | MG268614 |          | ZFMK-DNA-FD04784310 |
| S353  | <i>Gen.n. Br15-45</i>             | MG267642 | MG267897 | MG268211 |          | MG268687 | MG269014 | ZFMK-DNA-FD04784312 |
| S433  | <i>Gen.n. Br16-178</i>            | MG267663 |          | MG268275 |          | MG268641 | MG268999 | ZFMK-DNA-FD04784367 |
| S431  | <i>Gen.n. Br16-196</i>            |          | MG267949 | MG268273 |          | MG268646 | MG268991 | ZFMK-DNA-FD04784351 |
| S464  | <i>Gen.n. Br16-44</i>             |          | MG267978 | MG268305 | MG268571 | MG268620 | MG269110 | ZFMK-DNA-FD04784425 |
| S432  | <i>Gen.n. Br16-50</i>             | MG267662 |          | MG268274 |          | MG268657 | MG268986 | ZFMK-DNA-FD04784359 |
| S006  | <i>Gen.n. Geneve59</i>            | MG267438 |          | MG268066 | MG268384 |          | MG268985 | ZFMK-DNA-FD04784108 |
| S468  | <i>Gen.n. Ind206</i>              | MG267689 | MG267982 | MG268309 | MG268574 | MG268732 | MG269065 | ZFMK-DNA-FD04784362 |
| S357  | <i>Gen.n. MACN270</i>             |          | MG267896 | MG268201 | MG268504 | MG268621 | MG269186 | ZFMK-DNA-FD04784344 |
| S358  | <i>Gen.n. MACN273</i>             | MG267610 | MG267917 | MG268229 | MG268508 | MG268618 | MG268978 | ZFMK-DNA-FD04784257 |
| S501  | <i>Gen.n. Om6</i>                 | MG267720 | MG268008 | MG268338 | MG268601 | MG268615 | MG268968 | ZFMK-DNA-FD05101783 |
| JA83  | <i>Gen.n. Ven01</i>               |          |          |          | DQ667847 | DQ667903 |          | ZFMK-DNA-FC17941387 |
| S059  | <i>Gertschiola macrostyla</i>     | MG267465 |          | MG268038 | MG268364 |          |          | ZFMK-DNA-FD04784136 |
| S434  | <i>Gertschiola macrostyla</i>     | MG267664 | MG267950 | MG268276 | MG268557 | MG268725 | MG268967 | ZFMK-DNA-FD04784375 |
| S347  | <i>Guaranita yaculica?</i>        | MG267643 |          | MG268194 | MG268503 | MG268616 | MG268970 | ZFMK-DNA-FD04784264 |
| S122  | <i>Hantu kapit</i>                |          |          | MG268099 | MG268413 | MG268896 | MG269136 | ZFMK-DNA-FD04784147 |
| S412  | <i>Hantu kapit</i>                | MG267571 |          | MG268246 |          | MG268897 | MG269137 | ZFMK-DNA-FD04784397 |
| S322  | <i>Hantu niah</i>                 |          |          | MG268181 |          | MG268651 | MG269064 | ZFMK-DNA-FD04784262 |
| OG10  | <i>Harpactea hombergi</i>         |          | AF244148 |          | EU139820 | AF244233 | EU139752 |                     |
| OG36  | <i>Harpactocrates radulifer</i>   |          |          |          | EU139821 | AF244235 | EU139753 |                     |
| OG18  | <i>Herennia multipuncta</i>       | EU003236 | EU003260 | EU003386 | EU003433 | EU003288 | EU003320 |                     |
| S348  | <i>Holocneminus huangdi</i>       | MG267570 | MG267879 | MG268245 | MG268534 | MG268672 | MG268998 | ZFMK-DNA-FD04784272 |
| S486  | <i>Holocneminus Ind73</i>         | MG267705 | MG267992 | MG268324 |          | MG268713 | MG269123 | ZFMK-DNA-FD04784411 |
| S253  | <i>Holocneminus multiguttatus</i> | MG267518 | MG267795 | MG268131 | MG268441 |          |          | ZFMK-DNA-FD04784200 |
| S254  | <i>Holocneminus multiguttatus</i> | MG267519 | MG267796 | MG268132 | MG268442 |          | MG269124 | ZFMK-DNA-FD04784208 |
| S016  | <i>Holocneminus Phi105</i>        | MG267463 |          | MG268067 |          | MG268714 |          | ZFMK-DNA-FD04784093 |
| S078  | <i>Holocneminus Phi74</i>         |          | MG267756 | MG268068 |          | MG268712 | MG269125 | ZFMK-DNA-FD04784082 |
| S068  | <i>Holocneminus Phi9</i>          |          | MG267757 | MG268069 |          |          | MG269126 | ZFMK-DNA-FD04784105 |
| S435  | <i>Holocneminus caudatus</i>      | MG267665 | MG267951 | MG268277 | MG268590 | MG268890 | MG269111 | ZFMK-DNA-FD04784383 |
| P0233 | <i>Holocneminus hispanicus</i>    |          |          | JX024020 |          | JX023600 | JX023680 | ZFMK-DNA-100446113  |
| S436  | <i>Hoplopholcus asiaeminoris</i>  | MG267666 | MG267952 | MG268278 |          | MG268813 |          | ZFMK-DNA-FD04784391 |
| S009  | <i>Hoplopholcus cecconii</i>      | MG267447 |          | MG268084 |          | MG268811 |          | ZFMK-DNA-FD04784132 |
| S437  | <i>Hoplopholcus Del5</i>          | MG267667 | MG267953 | MG268279 |          | MG268814 |          | ZFMK-DNA-FD04784399 |
| S057  | <i>Hoplopholcus forskali</i>      | MG267446 | MG267758 | MG268083 |          |          |          | ZFMK-DNA-FD04784120 |
| S316  | <i>Hoplopholcus labyrinthi</i>    | MG267560 | MG267849 | MG268172 |          | MG268808 |          | ZFMK-DNA-FD04784309 |
| S438  | <i>Hoplopholcus Mar66</i>         | MG267668 | MG267954 | MG268280 |          | MG268815 |          | ZFMK-DNA-FD04784407 |
| S315  | <i>Hoplopholcus minotaurinus</i>  | MG267559 | MG267848 | MG268171 |          |          |          | ZFMK-DNA-FD04784301 |
| S314  | <i>Hoplopholcus minous</i>        | MG267558 | MG267847 | MG268170 |          |          |          | ZFMK-DNA-FD04784293 |
| S439  | <i>Hoplopholcus patrizii</i>      |          | MG267955 | MG268281 |          | MG268807 |          | ZFMK-DNA-FD04784415 |
| S440  | <i>Hoplopholcus Tur21</i>         | MG267669 | MG267956 | MG268282 |          | MG268812 |          | ZFMK-DNA-FD04784423 |
| S441  | <i>Hoplopholcus Tur32</i>         | MG267670 | MG267957 | MG268283 |          | MG268809 | MG269183 | ZFMK-DNA-FD04784431 |

| code  | species                           | 12S      | 16S      | 18S      | 28S      | CO1      | H3       | biobank             |
|-------|-----------------------------------|----------|----------|----------|----------|----------|----------|---------------------|
| S442  | <i>Hoplopholcus Tur7</i>          | MG267671 | MG267958 | MG268284 | MG268558 | MG268810 |          | ZFMK-DNA-FD04784439 |
| OG27  | <i>Hyptiotes gertschi</i>         |          | FJ607455 | FJ607492 | FJ607531 | FJ607566 | FJ607604 |                     |
| S443  | <i>Ibotyporanga Br16-149</i>      | MG267672 | MG267959 | MG268285 | MG268559 | MG268742 | MG268975 | ZFMK-DNA-FD04784352 |
| JA123 | <i>Ibotyporanga naideae</i>       |          | DQ667837 |          | DQ667843 | DQ667852 |          | ZFMK-DNA-FC17941422 |
| Ixc29 | <i>Ixchela abernathyi</i>         | MG267480 | KF178420 |          | MG268421 | KF150114 |          | ZFMK-DNA-FD04784060 |
| Ixc51 | <i>Ixchela santibanezi</i>        | MG267481 | KF178432 | MG268104 | MG268422 | KF150126 | MG268979 | ZFMK-DNA-FD04784076 |
| Ixc39 | <i>Ixchela tarco</i>              |          | KF178395 |          |          | KF150089 |          | ZFMK-DNA-FD04784068 |
| Ixc56 | <i>Ixchela viquezi</i>            |          | KF178434 |          |          | KF150128 |          | ZFMK-DNA-FD04784084 |
| S328  | <i>Kambiwa neotropica</i>         |          |          |          | MG268485 | MG268617 |          | ZFMK-DNA-FD04784302 |
| S318  | <i>Khorata circularis</i>         |          | MG267851 | MG268174 |          | MG268730 | MG269122 | ZFMK-DNA-FD04784325 |
| S319  | <i>Khorata dupla</i>              |          | MG267852 | MG268175 |          | MG268763 | MG269133 | ZFMK-DNA-FD04784333 |
| P0223 | <i>Khorata khammouan</i>          | JX023818 |          | JX024011 |          | JX023596 | JX023672 | ZFMK-DNA-100446390  |
| OG24  | <i>Kukulcania hibernalis</i>      | AY560726 | AY560684 |          | AY560764 | AY560796 |          |                     |
| S255  | <i>Leptopholcus borneensis</i>    | MG267520 |          |          | MG268443 |          | MG269141 | ZFMK-DNA-FD04784216 |
| GB36  | <i>Leptopholcus budongo</i>       |          |          |          |          | MG268729 |          |                     |
| P0260 | <i>Leptopholcus budongo</i>       |          |          | JX024041 | JX024135 |          | JX023691 | ZFMK-DNA-100437914  |
| P0237 | <i>Leptopholcus cf griswoldi</i>  |          | JX023919 | JX024024 | JX024125 |          |          | ZFMK-DNA-100433834  |
| P0176 | <i>Leptopholcus dschang</i>       | JX023787 |          | JX023973 | JX024082 | JX023562 | JX023636 | ZFMK-DNA-100446437  |
| P0192 | <i>Leptopholcus dschang</i>       | JX023800 | JX023886 | JX023987 | JX024094 |          | JX023646 | ZFMK-DNA-100446421  |
| GB07  | <i>Leptopholcus gabonicus</i>     |          |          |          |          | MG268727 |          |                     |
| P0160 | <i>Leptopholcus gracilis</i>      | JX023773 |          | JX023962 | JX024076 | JX023554 | JX023622 | ZFMK-DNA-100446452  |
| P0220 | <i>Leptopholcus gracilis?</i>     |          | JX023908 | JX024008 | JX024114 |          | JX023671 | ZFMK-DNA-100446393  |
| P0150 | <i>Leptopholcus guineensis</i>    | JX023763 | JX023856 | JX023955 | JX024068 | JX023548 | JX023615 | ZFMK-DNA-100446463  |
| SB070 | <i>Leptopholcus kandy</i>         | MG267729 | MG268019 | MG268346 |          |          | MG269142 |                     |
| SB071 | <i>Leptopholcus kandy</i>         | MG267730 | MG268020 | MG268347 |          |          | MG269143 |                     |
| GB08  | <i>Leptopholcus kintampo</i>      |          |          |          |          | MG268728 |          |                     |
| P0235 | <i>Leptopholcus MRAC530</i>       |          | JX023918 | JX024022 | JX024123 |          |          | ZFMK-DNA-100446383  |
| P0279 | <i>Leptopholcus podophthalmus</i> |          |          | JX024055 |          |          | JX023707 | ZFMK-DNA-100437885  |
| S349  | <i>Leptopholcus podophthalmus</i> | MG267572 | MG267867 | MG268248 | MG268491 | MG268752 | MG269140 | ZFMK-DNA-FD04784280 |
| SB068 | <i>Leptopholcus podophthalmus</i> | MG267728 | MG268018 | MG268345 |          | MG268753 |          |                     |
| P0146 | <i>Leptopholcus tipula</i>        |          | JX023853 | JX023954 | JX024067 | JX023545 | JX023611 | ZFMK-DNA-100446467  |
| P0169 | <i>Leptopholcus tipula</i>        |          |          | JX023970 | JX024079 | JX023560 | JX023629 | ZFMK-DNA-100446444  |
| P0236 | <i>Leptopholcus tipula</i>        |          |          | JX024023 | JX024124 | JX023602 | JX023682 | ZFMK-DNA-100446384  |
| P0261 | <i>Leptopholcus tipula</i>        |          | JX023929 |          |          |          | JX023692 | ZFMK-DNA-100437902  |
| OG11  | <i>Leucauge venusta_B</i>         |          | FJ607457 | FJ607494 | FJ607533 | FJ607568 | FJ607606 |                     |
| OG30  | <i>Linyphia triangularis_A</i>    | EU003239 | AY078664 |          | EU003410 | EU003292 | AY078702 |                     |
| S351  | <i>Litoporus Br15-107</i>         | MG267641 | MG267895 | MG268196 |          | MG268640 | MG268995 | ZFMK-DNA-FD04784296 |
| S444  | <i>Litoporus Br16-153</i>         | MG267673 | MG267960 |          |          | MG268697 | MG268996 | ZFMK-DNA-FD04784360 |
| S445  | <i>Litoporus Br16-62</i>          | MG267674 | MG267961 | MG268286 | MG268560 | MG268698 | MG268997 | ZFMK-DNA-FD04784368 |
| S446  | <i>Litoporus dimona</i>           | MG267675 | MG267962 | MG268287 | MG268561 | MG268692 | MG268976 | ZFMK-DNA-FD04784376 |
| P0212 | <i>Litoporus iguassuensis</i>     | JX023812 | JX023902 |          |          | JX023588 | JX023663 | ZFMK-DNA-100446408  |
| P0213 | <i>Litoporus iguassuensis</i>     | JX023813 | JX023903 |          |          |          | JX023664 | ZFMK-DNA-100446409  |
| S447  | <i>Litoporus manu</i>             |          | MG267963 | MG268288 | MG268562 | MG268705 | MG268990 | ZFMK-DNA-FD04784384 |
| OG17  | <i>Loxosceles laeta</i>           |          | EU817794 |          | GQ279182 | GQ279223 |          |                     |
| S448  | <i>Mecolaesthus arima</i>         | MG267676 | MG267964 | MG268289 | MG268597 | MG268675 | MG269015 | ZFMK-DNA-FD04784392 |
| JA89  | <i>Mecolaesthus longissimus</i>   | AY560696 | DQ667756 |          | AY560736 | DQ667861 |          |                     |
| S294  | <i>Mecolaesthus nigrifrons?</i>   |          | MG267829 | MG268158 | MG268471 |          | MG269016 | ZFMK-DNA-FD04784235 |
| S449  | <i>Mecolaesthus taino?</i>        |          | MG267965 | MG268290 | MG268563 | MG268688 | MG269017 | ZFMK-DNA-FD04784400 |
| S295  | <i>Mecolaesthus Ven02/80-12</i>   | MG267549 | MG267830 | MG268159 | MG268472 | MG268632 |          | ZFMK-DNA-FD04784243 |
| S450  | <i>Mecolaesthus yawaperi</i>      | MG267677 |          | MG268291 | MG268564 | MG268650 |          | ZFMK-DNA-FD04784408 |
| BB09a | <i>Mesabolivar aurantiacus</i>    | AY560695 | AY560669 |          | AY560735 | AY560778 |          |                     |
| S388  | <i>Mesabolivar azureus</i>        | MG267618 | MG267912 | MG268231 | MG268512 |          | MG269002 | ZFMK-DNA-FD04784307 |
| GB09  | <i>Mesabolivar bonita</i>         |          |          |          |          | MG268695 |          |                     |
| S487  | <i>Mesabolivar Br11-10</i>        | MG267706 | MG267993 | MG268325 | MG268584 | MG268696 | MG269010 | ZFMK-DNA-FD04784419 |
| S350  | <i>Mesabolivar Br14-25</i>        | MG267640 | MG267894 | MG268207 | MG268500 | MG268643 | MG269008 | ZFMK-DNA-FD04784288 |
| S390  | <i>Mesabolivar Br14-26</i>        | MG267619 | MG267914 | MG268233 | MG268514 | MG268684 | MG269005 | ZFMK-DNA-FD04784323 |
| S391  | <i>Mesabolivar Br14-30</i>        | MG267620 | MG267915 | MG268234 | MG268515 | MG268683 | MG269006 | ZFMK-DNA-FD04784331 |
| S389  | <i>Mesabolivar Br14-4</i>         | MG267621 | MG267913 | MG268232 | MG268513 | MG268674 | MG269003 | ZFMK-DNA-FD04784315 |
| S305  | <i>Mesabolivar Br14-55</i>        |          | MG267839 | MG268167 |          | MG268690 | MG269007 | ZFMK-DNA-FD04784316 |
| S451  | <i>Mesabolivar Br16-138</i>       | MG267678 | MG267966 | MG268292 | MG268565 | MG268648 |          | ZFMK-DNA-FD04784416 |
| S452  | <i>Mesabolivar Br16-32</i>        | MG267679 | MG267967 | MG268293 | MG268591 | MG268673 | MG269012 | ZFMK-DNA-FD04784424 |
| S453  | <i>Mesabolivar Br16-60</i>        |          | MG267968 | MG268294 | MG268592 | MG268649 |          | ZFMK-DNA-FD04784432 |
| BB10  | <i>Mesabolivar brasiliensis</i>   | AY560698 |          |          | AY560738 | AY560780 |          |                     |
| S456  | <i>Mesabolivar cambridgei</i>     | MG267681 | MG267970 | MG268297 |          | MG268771 | MG269052 | ZFMK-DNA-FD04784361 |
| JA50  | <i>Mesabolivar camussi</i>        |          | DQ667769 |          |          | DQ667875 |          | ZFMK-DNA-FC17941320 |
| JA10  | <i>Mesabolivar cavicelatus</i>    |          | DQ667772 |          |          | DQ667880 |          | ZFMK-DNA-FC17941285 |
| S395  | <i>Mesabolivar charrua</i>        | MG267593 | MG267919 |          | MG268523 | MG268681 | MG269011 | ZFMK-DNA-FD04784356 |

| code  | species                            | 12S      | 16S      | 18S      | 28S      | CO1      | H3       | biobank             |
|-------|------------------------------------|----------|----------|----------|----------|----------|----------|---------------------|
| JA52  | <i>Mesabolivar cyaneomaculatus</i> |          |          |          |          | DQ667865 |          | ZFMK-DNA-FC17941336 |
| BB11  | <i>Mesabolivar cyaneotaeniatus</i> | AY560699 | AY560671 |          | AY560739 | AY560781 |          |                     |
| JA57  | <i>Mesabolivar cyaneotaeniatus</i> |          | DQ667760 |          |          | DQ667866 |          | ZFMK-DNA-FC17941369 |
| JA34  | <i>Mesabolivar eberhardi</i>       |          | DQ667763 |          |          | DQ667870 |          | ZFMK-DNA-FC17941287 |
| JA93  | <i>Mesabolivar eberhardi</i>       |          | DQ667764 |          | DQ667845 | DQ667872 |          | ZFMK-DNA-FC17941372 |
| JA53  | <i>Mesabolivar gabettiae</i>       |          | DQ667775 |          |          | DQ667882 |          | ZFMK-DNA-FC17941344 |
| S410  | <i>Mesabolivar goitaca</i>         | MG267608 | MG267921 | MG268225 | MG268525 | MG268682 | MG269009 | ZFMK-DNA-FD04784381 |
| S454  | <i>Mesabolivar huambisa?</i>       | MG267680 | MG267969 | MG268295 | MG268593 | MG268647 |          | ZFMK-DNA-FD04784440 |
| S396  | <i>Mesabolivar huberi</i>          | MG267594 | MG267922 | MG268214 | MG268524 | MG268685 | MG269004 | ZFMK-DNA-FD04784364 |
| P0215 | <i>Mesabolivar itapoa</i>          | JX023814 | JX023905 | JX024003 | JX024111 | JX023590 | JX023666 | ZFMK-DNA-100446398  |
| S387  | <i>Mesabolivar kathrinae</i>       | MG267617 | MG267911 | MG268230 | MG268511 | MG268639 | MG269001 | ZFMK-DNA-FD04784299 |
| JA41  | <i>Mesabolivar luteus</i>          |          | DQ667766 |          | DQ667846 | DQ667873 |          | ZFMK-DNA-FC17941343 |
| JA19  | <i>Mesabolivar mairiyara</i>       |          | DQ667770 |          |          | DQ667876 |          | ZFMK-DNA-FC17941357 |
| GB10  | <i>Mesabolivar pau</i>             |          |          |          |          | MG268694 |          |                     |
| GB11  | <i>Mesabolivar sai</i>             |          |          |          |          | MG268629 |          |                     |
| S397  | <i>Mesabolivar spinulosus</i>      | MG267595 | MG267920 |          |          | MG268637 | MG269000 | ZFMK-DNA-FD04784372 |
| JA29  | <i>Mesabolivar tamoio</i>          |          | DQ667767 |          |          | DQ667874 |          | ZFMK-DNA-FC17941342 |
| JA54  | <i>Mesabolivar togatus</i>         |          |          |          |          | DQ667884 |          | ZFMK-DNA-FC17941352 |
| P0217 | <i>Mesabolivar unicornis</i>       | JX023816 |          | JX024005 |          | JX023592 | JX023668 | ZFMK-DNA-100446396  |
| BB07  | <i>Mesabolivar yuruani</i>         | AY560694 | AY560668 |          |          |          |          |                     |
| JA101 | <i>Mesabolivar yuruani</i>         |          | DQ667754 |          | DQ667844 | DQ667860 |          | ZFMK-DNA-FC17941436 |
| S398  | <i>Metagonia argentinensis</i>     | MG267596 | MG267924 | MG268215 |          | MG268715 | MG268981 | ZFMK-DNA-FD04784380 |
| JA78  | <i>Metagonia belize</i>            |          | DQ667778 |          |          |          |          | ZFMK-DNA-FC17941442 |
| S457  | <i>Metagonia beni</i>              | MG267682 | MG267971 | MG268298 |          | MG268884 |          | ZFMK-DNA-FD04784369 |
| P0198 | <i>Metagonia bifida?</i>           |          | JX023891 | JX023991 | JX024099 | JX023577 |          | ZFMK-DNA-100446415  |
| JA12  | <i>Metagonia Br03/80-25</i>        |          | DQ667786 |          |          | DQ667892 |          | ZFMK-DNA-FC17941301 |
| BB13  | <i>Metagonia Br03/80-25</i>        | AY560702 |          |          | AY560741 | AY560783 |          |                     |
| P0199 | <i>Metagonia Br07/80-1</i>         |          | JX023892 | JX023992 | JX024100 | JX023578 | JX023650 | ZFMK-DNA-100446414  |
| P0277 | <i>Metagonia Br09-2</i>            |          | JX023942 | JX024053 | JX024142 | JX023605 | JX023705 | ZFMK-DNA-100437883  |
| P0197 | <i>Metagonia Br09-4</i>            |          |          | JX023990 | JX024098 | JX023576 |          | ZFMK-DNA-100446416  |
| JA27  | <i>Metagonia Br09-52</i>           |          | DQ667890 |          |          | DQ667890 |          | ZFMK-DNA-FC17941326 |
| JA11  | <i>Metagonia Br09-55</i>           |          | DQ667785 |          |          | DQ667891 |          | ZFMK-DNA-FC17941293 |
| S488  | <i>Metagonia Br10-38</i>           | MG267707 | MG267994 | MG268326 | MG268585 | MG268873 | MG268980 | ZFMK-DNA-FD04784427 |
| S489  | <i>Metagonia Br11-11</i>           | MG267708 | MG267995 | MG268327 | MG268586 | MG268726 | MG268982 | ZFMK-DNA-FD04784435 |
| S458  | <i>Metagonia Br15-101</i>          |          | MG267972 | MG268299 | MG268566 | MG268762 | MG269128 | ZFMK-DNA-FD04784377 |
| S459  | <i>Metagonia Br16-125</i>          |          | MG267973 | MG268300 | MG268595 | MG268875 | MG268983 | ZFMK-DNA-FD04784385 |
| S460  | <i>Metagonia Br16-180</i>          |          | MG267974 | MG268301 | MG268567 | MG268817 |          | ZFMK-DNA-FD04784393 |
| S490  | <i>Metagonia Br16-205</i>          | MG267709 | MG267996 | MG268328 | MG268587 | MG268892 | MG269129 | ZFMK-DNA-FD04784443 |
| S461  | <i>Metagonia Br16-216</i>          | MG267683 | MG267975 | MG268302 | MG268568 | MG268893 | MG269130 | ZFMK-DNA-FD04784401 |
| JA117 | <i>Metagonia delicata</i>          |          | DQ667780 |          |          |          |          | ZFMK-DNA-FC17941374 |
| P0216 | <i>Metagonia furcata</i>           | JX023815 | JX023906 | JX024004 | JX024112 | JX023591 | JX023667 | ZFMK-DNA-100446397  |
| BB14  | <i>Metagonia G062</i>              | AY560703 | AY560673 |          | AY560742 | AY560784 |          |                     |
| S462  | <i>Metagonia globulosa</i>         | MG267684 | MG267976 | MG268303 | MG268569 |          |          | ZFMK-DNA-FD04784409 |
| S399  | <i>Metagonia jamaica</i>           | MG267597 | MG267927 | MG268216 | MG268531 | MG268816 | MG269113 | ZFMK-DNA-FD04784388 |
| JA23  | <i>Metagonia mariguitarensis</i>   |          | DQ667781 |          |          | DQ667887 |          | ZFMK-DNA-FC17941294 |
| JA15  | <i>Metagonia paranapiacaba</i>     |          | DQ667783 |          |          | DQ667889 |          | ZFMK-DNA-FC17941325 |
| S400  | <i>Metagonia potiguar</i>          | MG267598 | MG267926 | MG268217 | MG268532 | MG268826 |          | ZFMK-DNA-FD04784396 |
| S401  | <i>Metagonia rica?</i>             | MG267599 | MG267925 | MG268218 | MG268526 | MG268883 |          | ZFMK-DNA-FD04784404 |
| S039  | <i>Metagonia taruma</i>            |          |          | MG268036 | MG268368 |          |          | ZFMK-DNA-FD04784079 |
| S463  | <i>Metagonia USA2</i>              | MG267685 | MG267977 | MG268304 | MG268570 | MG268824 | MG268988 | ZFMK-DNA-FD04784417 |
| JA85  | <i>Metagonia Ven02</i>             |          | DQ667793 |          |          | DQ667900 |          | ZFMK-DNA-FC17941403 |
| JA8   | <i>Metagonia Ven54</i>             |          | DQ667788 |          |          | DQ667894 |          | ZFMK-DNA-FC17941364 |
| S355  | <i>Micromerys baiteta</i>          | MG267573 | MG267868 | MG268249 | MG268535 | MG268630 | MG269146 | ZFMK-DNA-FD04784328 |
| S296  | <i>Micromerys raveni</i>           | MG267550 | MG267831 | MG268160 |          | MG268723 | MG269144 | ZFMK-DNA-FD04784251 |
| S297  | <i>Micromerys yidin</i>            | MG267551 | MG267832 | MG268161 | MG268473 | MG268724 | MG269145 | ZFMK-DNA-FD04784252 |
| GB37  | <i>Micropholcus baoruco</i>        |          |          |          |          | MG268886 |          |                     |
| P0166 | <i>Micropholcus baoruco</i>        | JX023779 |          | JX023967 |          |          | JX023626 | ZFMK-DNA-100446103  |
| Mic02 | <i>Micropholcus dalei</i>          |          |          | KF715594 | KF715612 | KF715606 | KF715577 | ZFMK-DNA-100417581  |
| Mic16 | <i>Micropholcus delicatulus</i>    |          | KF715619 | KF715596 | KF715614 |          | KF715575 | ZFMK-DNA-100417884  |
| P0193 | <i>Micropholcus fauroti</i>        | JX023801 | JX023887 | JX023988 | JX024095 | JX023574 | JX023647 | ZFMK-DNA-100446420  |
| P0165 | <i>Micropholcus hispaniola</i>     | JX023778 |          | JX023966 |          | JX023558 | JX023625 | ZFMK-DNA-100446457  |
| S228  | <i>Micropholcus Phi114</i>         |          |          |          | MG268398 |          | MG269112 | ZFMK-DNA-FD04784214 |
| GB38  | <i>Micropholcus piau</i>           |          |          |          |          | MG268905 |          |                     |
| Mic10 | <i>Micropholcus piau</i>           |          | KF715615 | KF715588 | KF715608 |          | KF715567 | ZFMK-DNA-100436777  |
| P0167 | <i>Micropholcus toma?</i>          | JX023780 |          | JX023968 | JX024078 |          | JX023627 | ZFMK-DNA-100446446  |
| GB39  | <i>Micropholcus ubajara</i>        |          |          |          |          | MG268847 |          |                     |
| Mic11 | <i>Micropholcus ubajara</i>        |          |          | KF715589 |          |          | KF715572 | ZFMK-DNA-100437029  |
| NF69  | <i>Modisimus berac</i>             |          | FJ227995 |          |          | FJ228030 |          | ZFMK-DNA-FC17941283 |

| code  | species                         | 12S      | 16S      | 18S      | 28S      | CO1      | H3       | biobank             |
|-------|---------------------------------|----------|----------|----------|----------|----------|----------|---------------------|
| S356  | <i>Modisimus cavaticus</i>      | MG267644 | MG267898 | MG268195 | MG268502 | MG268625 | MG268989 | ZFMK-DNA-FD04784336 |
| NF13  | <i>Modisimus cienaga</i>        |          | FJ227982 |          |          | FJ228018 |          | ZFMK-DNA-FC17941297 |
| IA03  | <i>Modisimus Cu12-11</i>        |          | MG268026 |          |          | MG268691 |          |                     |
| S106  | <i>Modisimus Cu12-11</i>        |          |          |          | MG268427 |          |          | ZFMK-DNA-FD04784146 |
| IA04  | <i>Modisimus Cu12-136</i>       |          | MG268025 |          | MG268609 | MG268710 |          |                     |
| NF3   | <i>Modisimus cuadro</i>         |          | FJ227981 |          |          | FJ228017 |          | ZFMK-DNA-FC17941353 |
| IA01  | <i>Modisimus culicinus</i>      |          | MG268024 |          | MG268607 | MG268708 |          |                     |
| NF43  | <i>Modisimus culicinus</i>      |          | FJ227971 |          |          | FJ228007 |          | ZFMK-DNA-FC17941314 |
| IA05  | <i>Modisimus elongatus</i>      |          | MG268023 |          | MG268610 | MG268689 |          |                     |
| NF101 | <i>Modisimus enriqueillo</i>    |          | FJ227973 |          |          | FJ228008 |          | ZFMK-DNA-FC17941281 |
| NF80  | <i>Modisimus epepye</i>         |          | FJ227976 |          |          | FJ228011 |          | ZFMK-DNA-FC17941331 |
| NF66  | <i>Modisimus fuscus</i>         |          | FJ227970 |          |          | FJ228006 |          | ZFMK-DNA-FC17941354 |
| P0228 | <i>Modisimus G106</i>           |          | JX023913 | JX024016 | JX024120 | JX023597 | JX023676 | ZFMK-DNA-100446376  |
| NF9   | <i>Modisimusiskeya</i>          |          | FJ227978 |          |          | FJ228013 |          | ZFMK-DNA-FC17941276 |
| NF87  | <i>Modisimus leprete</i>        |          | FJ227959 |          |          | FJ227997 |          | ZFMK-DNA-FC17941355 |
| IA02  | <i>Modisimus macaya</i>         |          | MG268022 |          | MG268608 | MG268671 |          |                     |
| NF37  | <i>Modisimus makandal</i>       |          | FJ227987 |          |          | FJ228021 |          | ZFMK-DNA-FC17941282 |
| NF89  | <i>Modisimus mango</i>          |          | FJ227960 |          |          | FJ227998 |          | ZFMK-DNA-FC17941363 |
| NF24  | <i>Modisimus miri</i>           |          | FJ227964 |          |          | FJ228032 |          | ZFMK-DNA-FC17941337 |
| NF64  | <i>Modisimus palvet</i>         |          | FJ227962 |          |          | FJ228000 |          | ZFMK-DNA-FC17941346 |
| NF53  | <i>Modisimus paraiso</i>        |          | FJ227974 |          |          | FJ228009 |          | ZFMK-DNA-FC17941330 |
| S113  | <i>Modisimus pavidus</i>        |          |          | MG268115 | MG268431 | MG268709 |          | ZFMK-DNA-FD04784091 |
| NF71  | <i>Modisimus roumaini</i>       |          | FJ227983 |          |          | FJ228019 |          | ZFMK-DNA-FC17941291 |
| NF81  | <i>Modisimus sequin</i>         |          | FJ227992 |          |          | FJ228026 |          | ZFMK-DNA-FC17941339 |
| S231  | <i>Modisimus signatus</i>       |          | MG267785 |          | MG268400 | MG268624 |          | ZFMK-DNA-FD04784238 |
| NF68  | <i>Modisimus tiburon</i>        |          | FJ227967 |          |          | FJ228003 |          | ZFMK-DNA-FC17941275 |
| NF1   | <i>Modisimus toma</i>           |          | FJ227980 |          |          | FJ228016 |          | ZFMK-DNA-FC17941273 |
| NF41  | <i>Modisimus vittatus</i>       |          | FJ227991 |          |          | FJ228025 |          | ZFMK-DNA-FC17941306 |
| OG8   | <i>Nephila clavipes_A</i>       |          | EU003276 | EU003378 |          | EU003302 | EU003333 |                     |
| S061  | <i>Nerudia Mich20</i>           |          |          |          | MG268365 |          |          | ZFMK-DNA-FD04784152 |
| BB16  | <i>Ninetis subtilissima</i>     | AY560705 |          |          | AY560744 |          |          |                     |
| P0234 | <i>Nita elsaft</i>              | JX023823 | JX023917 | JX024021 |          | JX023601 | JX023681 | ZFMK-DNA-100446382  |
| P0144 | <i>Nytkoa limbe</i>             |          | JX023851 | JX023952 | JX024065 | JX023544 |          | ZFMK-DNA-100446469  |
| P0179 | <i>Nytkoa limbe</i>             | JX023789 | JX023879 | JX023976 | JX024085 | JX023564 | JX023638 | ZFMK-DNA-100446423  |
| OG2   | <i>Oecobius sp</i>              |          | FJ607466 | FJ607505 | FJ607540 | FJ607579 | FJ607617 |                     |
| S320  | <i>Otavaloa cf angotero</i>     |          | MG267853 | MG268176 |          |          | MG268994 | ZFMK-DNA-FD04784341 |
| S465  | <i>Otavaloa lisei</i>           | MG267686 | MG267979 | MG268306 | MG268572 | MG268631 | MG268992 | ZFMK-DNA-FD04784433 |
| S021  | <i>Otavaloa piro?</i>           | MG267434 | MG267759 | MG268041 |          | MG268822 | MG268993 | ZFMK-DNA-FD04784133 |
| S359  | <i>Panjange alba</i>            | MG267574 | MG267869 |          | MG268543 | MG268818 |          | ZFMK-DNA-FD04784265 |
| S466  | <i>Panjange camiguin</i>        | MG267687 | MG267980 | MG268307 | MG268573 | MG268908 |          | ZFMK-DNA-FD04784441 |
| S066  | <i>Panjange casaroro</i>        |          | MG267760 |          | MG268385 | MG268899 |          | ZFMK-DNA-FD04784089 |
| S360  | <i>Panjange cavicola</i>        | MG267575 | MG267870 |          | MG268544 | MG268878 |          | ZFMK-DNA-FD04784273 |
| S218  | <i>Panjange dinagat</i>         | MG267479 |          |          | MG268390 | MG268901 |          | ZFMK-DNA-FD04784237 |
| GB40  | <i>Panjange iban</i>            |          |          |          |          | MG268929 |          |                     |
| S169  | <i>Panjange iban</i>            | MG267504 |          |          | MG268410 |          |          | ZFMK-DNA-FD04784220 |
| S361  | <i>Panjange Ind103</i>          | MG267576 | MG267872 | MG268251 | MG268536 | MG268909 | MG269149 | ZFMK-DNA-FD04784281 |
| S362  | <i>Panjange Ind109</i>          | MG267577 | MG267871 | MG268253 | MG268490 | MG268958 |          | ZFMK-DNA-FD04784289 |
| S173  | <i>Panjange kapit</i>           | MG267491 | MG267935 |          | MG268415 | MG268931 |          | ZFMK-DNA-FD04784157 |
| GB41  | <i>Panjange kubah</i>           |          |          |          |          | MG268932 |          |                     |
| S171  | <i>Panjange kubah</i>           | MG267506 |          |          | MG268412 |          |          | ZFMK-DNA-FD04784236 |
| S010  | <i>Panjange lanthana</i>        | MG267455 |          | MG268107 |          | MG268881 |          | ZFMK-DNA-FD04784140 |
| S224  | <i>Panjange malagos</i>         | MG267475 |          |          | MG268395 | MG268898 |          | ZFMK-DNA-FD04784182 |
| S222  | <i>Panjange marilog</i>         | MG267477 |          |          | MG268393 | MG268900 |          | ZFMK-DNA-FD04784166 |
| S172  | <i>Panjange niah?</i>           | MG267507 |          |          |          |          |          | ZFMK-DNA-FD04784244 |
| S174  | <i>Panjange pueh</i>            | MG267492 |          |          | MG268416 | MG268930 |          | ZFMK-DNA-FD04784165 |
| GB42  | <i>Panjange seowi</i>           |          |          |          |          | MG268933 |          |                     |
| S170  | <i>Panjange seowi</i>           | MG267505 |          |          | MG268411 |          |          | ZFMK-DNA-FD04784228 |
| S011  | <i>Papiamenta MRAC639</i>       | MG267439 |          | MG268037 |          |          |          | ZFMK-DNA-FD04784148 |
| P0245 | <i>Paramicromerys betsileo?</i> | JX023828 | JX023923 |          |          |          |          | ZFMK-DNA-100433806  |
| P0244 | <i>Paramicromerys CAS11</i>     |          | JX023922 | JX024030 |          |          |          | ZFMK-DNA-100433815  |
| S363  | <i>Paramicromerys CAS17</i>     | MG267611 | MG267899 | MG268235 |          | MG268638 |          | ZFMK-DNA-FD04784297 |
| P0238 | <i>Paramicromerys CAS3</i>      |          | JX023920 | JX024025 |          |          |          | ZFMK-DNA-100437925  |
| P0221 | <i>Paramicromerys G046</i>      |          |          | JX024009 | JX024115 | JX023594 |          | ZFMK-DNA-100446392  |
| S383  | <i>Paramicromerys? CAS13</i>    | MG267613 | MG267900 | MG268237 |          | MG268951 | MG269092 | ZFMK-DNA-FD04784267 |
| S467  | <i>Paramicromerys? CAS4</i>     | MG267688 | MG267981 | MG268308 | MG268596 | MG268940 | MG269091 | ZFMK-DNA-FD04784354 |
| P0151 | <i>Pehrforsskalia conopyga</i>  | JX023764 | JX023857 | JX023956 | JX024069 | JX023549 | JX023616 | ZFMK-DNA-100446462  |
| P0168 | <i>Pehrforsskalia conopyga</i>  | JX023781 | JX023870 | JX023969 |          | JX023559 | JX023628 | ZFMK-DNA-100446445  |
| JA45  | <i>Pholcophora americana</i>    |          | DQ667797 |          | DQ667848 | DQ667905 |          | ZFMK-DNA-FC17941280 |
| JA46  | <i>Pholcophora americana</i>    |          | DQ667798 |          |          | DQ667906 |          | ZFMK-DNA-FC17941288 |
| S298  | <i>Pholcophora? Car544</i>      | MG267552 | MG267833 |          | MG268475 | MG268741 |          | ZFMK-DNA-FD04784260 |

| code  | species                                                 | 12S      | 16S      | 18S      | 28S      | CO1      | H3       | biobank             |
|-------|---------------------------------------------------------|----------|----------|----------|----------|----------|----------|---------------------|
| S256  | <i>'Pholcus gracillimus'</i><br><i>sensu Huber 2011</i> | MG267563 | MG267857 | MG268133 |          | MG268858 | MG269180 | ZFMK-DNA-FD04784224 |
| S257  | <i>'Pholcus kohi'</i><br><i>sensu Huber 2011</i>        | MG267521 | MG267858 | MG268134 |          | MG268859 |          | ZFMK-DNA-FD04784232 |
| S321  | <i>Pholcus agadir</i>                                   |          | MG267854 | MG268177 | MG268484 | MG268754 | MG268987 | ZFMK-DNA-FD04784254 |
| S178  | <i>Pholcus andulau</i>                                  |          |          |          |          | MG268927 | MG269175 | ZFMK-DNA-FD04784173 |
| S469  | <i>Pholcus andulau</i>                                  | MG267690 |          |          |          | MG268928 |          | ZFMK-DNA-FD04784370 |
| S071  | <i>Pholcus arayat</i>                                   |          | MG267761 | MG268260 |          |          |          | ZFMK-DNA-FD04784129 |
| P0281 | <i>Pholcus atrigularis</i>                              | JX023846 | JX023945 |          |          | JX023606 |          | ZFMK-DNA-100437887  |
| P0177 | <i>Pholcus attuleh</i>                                  | JX023788 | JX023877 | JX023974 |          | JX023563 | JX023637 | ZFMK-DNA-100446436  |
| S070  | <i>Pholcus baguio</i>                                   |          | MG267769 | MG268259 |          | MG268865 | MG269174 | ZFMK-DNA-FD04784121 |
| P0196 | <i>Pholcus baka</i>                                     | JX023803 | JX023890 | JX023989 |          | JX023575 | JX023649 | ZFMK-DNA-100446417  |
| GB43  | <i>Pholcus bamboutos</i>                                |          |          |          |          | MG268848 |          |                     |
| P0181 | <i>Pholcus bamboutos</i>                                | JX023791 | JX023881 |          |          |          | JX023640 | ZFMK-DNA-100446425  |
| P0195 | <i>Pholcus bamboutos</i>                                | JX023802 | JX023889 |          |          |          |          | ZFMK-DNA-100446418  |
| S470  | <i>Pholcus bario</i>                                    | MG267691 | MG267983 | MG268310 | MG268575 | MG268855 |          | ZFMK-DNA-FD04784378 |
| S366  | <i>Pholcus barisan</i>                                  | MG267581 | MG267873 | MG268252 | MG268537 | MG268959 | MG269139 | ZFMK-DNA-FD04784321 |
| P0250 | <i>Pholcus beijingensis</i>                             | JX023831 | JX023925 | JX024034 |          |          |          | ZFMK-DNA-100437904  |
| S064  | <i>Pholcus bicornutus</i>                               | MG267444 | MG267762 | MG268033 | MG268388 |          |          | ZFMK-DNA-FD04784073 |
| S012  | <i>Pholcus bikilai</i>                                  | MG267441 | MG267763 | MG268032 |          |          | MG269173 | ZFMK-DNA-FD04784061 |
| P0147 | <i>Pholcus bourgini</i>                                 | JX023760 | JX023854 |          |          | JX023546 | JX023612 | ZFMK-DNA-100446466  |
| S266  | <i>Pholcus buatong</i>                                  | MG267530 |          |          |          |          | MG269171 | ZFMK-DNA-FD04784209 |
| S271  | <i>Pholcus bukittimah</i>                               | MG267535 | MG267810 | MG268141 | MG268455 | MG268916 |          | ZFMK-DNA-FD04784249 |
| S364  | <i>Pholcus camba</i>                                    | MG267578 | MG267876 | MG268257 |          | MG268860 | MG269178 | ZFMK-DNA-FD04784305 |
| P0247 | <i>Pholcus cf jaegeri</i>                               | JX023829 | JX023924 | JX024032 | JX024129 | JX023603 | JX023685 | ZFMK-DNA-100437916  |
| P0162 | <i>Pholcus chappuisi</i>                                | JX023775 | JX023867 | JX023964 |          |          | JX023623 | ZFMK-DNA-100446454  |
| P0201 | <i>Pholcus chappuisi</i>                                | JX023804 | JX023894 | JX023994 | JX024102 |          | JX023652 | ZFMK-DNA-100446412  |
| P0148 | <i>Pholcus chattoni</i>                                 | JX023761 |          |          |          |          | JX023613 | ZFMK-DNA-100446465  |
| S101  | <i>Pholcus chengpoi</i>                                 |          |          |          | MG268424 | MG268907 |          | ZFMK-DNA-FD04784106 |
| S482  | <i>Pholcus cibodas</i>                                  | MG267701 |          | MG268320 | MG268580 | MG268950 |          | ZFMK-DNA-FD04784379 |
| S324  | <i>Pholcus creticus</i>                                 | MG267562 | MG267856 | MG268179 |          |          |          | ZFMK-DNA-FD04784278 |
| P0182 | <i>Pholcus crypticolens</i>                             | JX023792 | JX023882 | JX023977 |          | JX023566 |          | ZFMK-DNA-100446426  |
| P0222 | <i>Pholcus dade</i>                                     | JX023817 | JX023909 | JX024010 | JX024116 | JX023595 |          | ZFMK-DNA-100446391  |
| P0172 | <i>Pholcus debilis</i>                                  | JX023784 | JX023873 |          |          |          | JX023632 | ZFMK-DNA-100446441  |
| P0225 | <i>Pholcus dentatus</i>                                 | JX023819 | JX023911 | JX024013 |          |          | JX023674 | ZFMK-DNA-100446388  |
| S258  | <i>Pholcus diopsis</i>                                  | MG267522 |          |          | MG268444 | MG268879 |          | ZFMK-DNA-FD04784240 |
| GB13  | <i>Pholcus domingo</i>                                  |          |          |          |          | MG268947 |          |                     |
| S013  | <i>Pholcus domingo</i>                                  | MG267440 |          |          |          |          |          | ZFMK-DNA-FD04784069 |
| P0149 | <i>Pholcus doucki</i>                                   | JX023762 | JX023855 |          |          | JX023547 | JX023614 | ZFMK-DNA-100446464  |
| S259  | <i>Pholcus erawan</i>                                   | MG267523 | MG267801 |          | MG268445 | MG268839 | MG269151 | ZFMK-DNA-FD04784248 |
| S260  | <i>Pholcus erawan</i>                                   | MG267524 | MG267802 |          | MG268446 |          | MG269152 | ZFMK-DNA-FD04784161 |
| S024  | <i>Pholcus ethagala</i>                                 | MG267448 | MG267741 |          |          |          | MG268974 | ZFMK-DNA-FD04784149 |
| SB017 | <i>Pholcus ethagala?</i>                                | MG267733 |          |          |          |          | MG268977 |                     |
| P0158 | <i>Pholcus fagei</i>                                    | JX023771 | JX023864 | JX023961 | JX024074 |          | JX023621 | ZFMK-DNA-100446450  |
| P0159 | <i>Pholcus fagei</i>                                    | JX023772 | JX023865 |          | JX024075 | JX023553 |          | ZFMK-DNA-100446451  |
| P0287 | <i>Pholcus fengcheng</i>                                | JX023848 |          | JX024062 | JX024145 | JX023608 | JX023713 | ZFMK-DNA-100433811  |
| S105  | <i>Pholcus fragillimus</i>                              | MG267486 |          | MG268111 | MG268426 | KJ650076 |          | ZFMK-DNA-FD04784138 |
| S047  | <i>Pholcus G044</i>                                     |          |          | MG268027 | MG268352 | DQ667927 |          | ZFMK-DNA-FD04784143 |
| S261  | <i>Pholcus gombak</i>                                   | MG267525 | MG267803 |          | MG268447 | MG268915 |          | ZFMK-DNA-FD04784169 |
| P0202 | <i>Pholcus Gui32</i>                                    | JX023805 |          | JX023995 |          | JX023579 | JX023653 | ZFMK-DNA-100446110  |
| S262  | <i>Pholcus halabala</i>                                 | MG267526 | MG267804 |          | MG268448 | MG268843 | MG269159 | ZFMK-DNA-FD04784177 |
| S365  | <i>Pholcus hurau</i>                                    | MG267579 | MG267874 |          |          | MG268838 |          | ZFMK-DNA-FD04784313 |
| S299  | <i>Pholcus jinwum</i>                                   | MG267553 |          | MG268162 | MG268476 | MG268925 | MG269177 | ZFMK-DNA-FD04784268 |
| P0288 | <i>Pholcus jiuwei</i>                                   | JX023849 | JX023950 | JX024063 | JX024146 | JX023609 | JX023714 | ZFMK-DNA-100437875  |
| P0145 | <i>Pholcus kakum</i>                                    | JX023759 | JX023852 | JX023953 | JX024066 |          | JX023610 | ZFMK-DNA-100446468  |
| GB44  | <i>Pholcus kawit</i>                                    |          |          |          |          | MG268866 |          |                     |
| S225  | <i>Pholcus kawit</i>                                    | MG267474 | MG267799 |          |          |          |          | ZFMK-DNA-FD04784190 |
| S367  | <i>Pholcus kerinci</i>                                  | MG267582 |          |          |          | MG268949 |          | ZFMK-DNA-FD04784329 |
| S268  | <i>Pholcus khaolek</i>                                  | MG267532 | MG267808 | MG268138 |          | MG268832 | MG269155 | ZFMK-DNA-FD04784225 |
| P0248 | <i>Pholcus kimi</i>                                     | JX023830 |          | JX024033 | JX024130 |          |          | ZFMK-DNA-100433839  |
| P0203 | <i>Pholcus kindia</i>                                   | JX023806 | JX023895 |          |          | JX023580 | JX023654 | ZFMK-DNA-100446399  |
| S186  | <i>Pholcus kipungit</i>                                 |          |          |          |          | MG268835 |          | ZFMK-DNA-FD04784213 |
| S502  | <i>Pholcus kottawagamaensis</i>                         | MG267721 | MG268009 |          |          | MG268888 |          | ZFMK-DNA-FD05101791 |
| S267  | <i>Pholcus krabi</i>                                    | MG267531 | MG267807 | MG268137 | MG268452 | MG268836 |          | ZFMK-DNA-FD04784217 |
| P0171 | <i>Pholcus kribi</i>                                    | JX023783 | JX023872 |          |          | JX023561 | JX023631 | ZFMK-DNA-100446442  |
| S265  | <i>Pholcus kuhapimuk</i>                                | MG267529 | MG267806 | MG268136 | MG268451 | MG268830 | MG269156 | ZFMK-DNA-FD04784201 |
| S183  | <i>Pholcus lambir</i>                                   |          |          |          |          | MG268926 | MG269176 | ZFMK-DNA-FD04784189 |
| S263  | <i>Pholcus ledang</i>                                   | MG267527 | MG267805 |          | MG268449 | MG268917 |          | ZFMK-DNA-FD04784185 |
| P0163 | <i>Pholcus leruthi</i>                                  | JX023776 | JX023868 |          |          | JX023556 |          | ZFMK-DNA-100446455  |
| S185  | <i>Pholcus lintang</i>                                  |          |          | MG268118 | MG268418 | MG268842 | MG269158 | ZFMK-DNA-FD04784205 |
| JA42  | <i>Pholcus manueli</i>                                  |          | DQ667800 |          |          | DQ667908 |          | ZFMK-DNA-FC17941351 |
| BB19  | <i>Pholcus manueli (sp1 Bruwo)</i>                      | AY560706 |          |          | AY560749 | AY560786 |          |                     |
| S056  | <i>Pholcus maronita?</i>                                | MG267467 | MG267765 | MG268029 |          | MG268880 |          | ZFMK-DNA-FD04784112 |

| code  | species                                | 12S      | 16S      | 18S      | 28S      | CO1      | H3       | biobank             |
|-------|----------------------------------------|----------|----------|----------|----------|----------|----------|---------------------|
| S503  | <i>Pholcus maturata</i>                | MG267727 | MG268010 |          |          | MG268887 |          | ZFMK-DNA-FD05101704 |
| S226  | <i>Pholcus matutum</i>                 | MG267473 |          |          | MG268396 | MG268948 |          | ZFMK-DNA-FD04784198 |
| S368  | <i>Pholcus mentawir</i>                | MG267583 | MG267877 | MG268258 | MG268538 | MG268711 | MG269135 | ZFMK-DNA-FD04784337 |
| S053  | <i>Pholcus moca</i>                    |          | MG267766 | MG268030 | MG268350 |          |          | ZFMK-DNA-FD04784088 |
| P0230 | <i>Pholcus MRAC553</i>                 |          | JX023914 | JX024017 | JX024121 | JX023598 | JX023677 | ZFMK-DNA-100446378  |
| S188  | <i>Pholcus mulu</i>                    | MG267493 |          | MG268119 | MG268419 | MG268863 |          | ZFMK-DNA-FD04784221 |
| S264  | <i>Pholcus narathiwat</i>              | MG267528 |          | MG268135 | MG268450 | MG268834 |          | ZFMK-DNA-FD04784193 |
| S273  | <i>Pholcus negara</i>                  | MG267537 | MG267812 | MG268142 |          | MG268861 | MG269179 | ZFMK-DNA-FD04784170 |
| GB45  | <i>Pholcus nkoetye</i>                 |          |          |          |          | MG268819 |          |                     |
| P0270 | <i>Pholcus nkoetye</i>                 | JX023840 | JX023937 |          |          |          | JX023701 | ZFMK-DNA-100437893  |
| GB46  | <i>Pholcus olangapo</i>                |          |          |          |          | MG268857 |          |                     |
| S014  | <i>Pholcus olangapo</i>                | MG267443 | MG267797 | MG268028 | MG268414 |          |          | ZFMK-DNA-FD04784077 |
| BB17  | <i>Pholcus opilionoides</i>            | AY560707 | AY560674 |          |          |          |          |                     |
| P0232 | <i>Pholcus ornatus</i>                 | JX023822 | JX023916 | JX024019 | JX024122 | JX023599 | JX023679 | ZFMK-DNA-100446380  |
| S065  | <i>Pholcus pagbilao</i>                | MG267442 | MG267767 |          |          |          |          | ZFMK-DNA-FD04784081 |
| S072  | <i>Pholcus pagbilao</i>                | MG267496 | MG267798 | MG268108 |          | MG268862 |          | ZFMK-DNA-FD04784137 |
| BB18a | <i>Pholcus phalangioides</i>           | AY560708 | AY560675 |          |          |          |          |                     |
| JA43  | <i>Pholcus phalangioides</i>           |          | DQ667809 |          |          | DQ667920 |          | ZFMK-DNA-FC17941359 |
| P0286 | <i>Pholcus phoenixus</i>               | JX023847 | JX023949 | JX024061 | JX024144 |          | JX023712 | ZFMK-DNA-100437877  |
| S274  | <i>Pholcus phui</i>                    | MG267538 | MG267813 |          | MG268456 | MG268912 |          | ZFMK-DNA-FD04784178 |
| S236  | <i>Pholcus pingtung</i>                | MG267469 |          |          |          | MG268906 | MG269131 | ZFMK-DNA-FD04784183 |
| S051  | <i>Pholcus punu</i>                    |          | MG267764 | MG268031 | MG268351 |          |          | ZFMK-DNA-FD04784072 |
| S369  | <i>Pholcus quinquenotatus</i>          | MG267584 | MG267878 | MG268250 |          | MG268828 | MG269150 | ZFMK-DNA-FD04784345 |
| S052  | <i>Pholcus rawiriae</i>                | MG267445 | MG267768 |          |          |          | MG269134 | ZFMK-DNA-FD04784080 |
| S182  | <i>Pholcus sabah</i>                   |          |          | MG268117 | MG268417 | MG268841 | MG269157 | ZFMK-DNA-FD04784181 |
| S275  | <i>Pholcus satun</i>                   |          | MG267814 |          |          | MG268911 |          | ZFMK-DNA-FD04784186 |
| GB47  | <i>Pholcus schwendingeri</i>           |          |          |          |          | MG268910 |          |                     |
| S276  | <i>Pholcus schwendingeri</i>           | MG267539 | MG267815 |          | MG268457 |          | MG269170 | ZFMK-DNA-FD04784194 |
| S370  | <i>Pholcus sepaku</i>                  | MG267625 | MG267916 | MG268242 | MG268521 | MG268844 | MG269160 | ZFMK-DNA-FD04784258 |
| S371  | <i>Pholcus singalang</i>               | MG267580 | MG267875 |          |          | MG268837 |          | ZFMK-DNA-FD04784266 |
| S234  | <i>Pholcus SMF422</i>                  | MG267470 |          |          | MG268402 | MG268869 | MG269132 | ZFMK-DNA-FD04784167 |
| S104  | <i>Pholcus spilis</i>                  | MG267485 |          | MG268110 |          | MG268885 | MG269172 | ZFMK-DNA-FD04784130 |
| GB48  | <i>Pholcus sudhami</i>                 |          |          |          |          | MG268831 |          |                     |
| S277  | <i>Pholcus sudhami</i>                 | MG267540 | MG267816 | MG268143 |          |          | MG269154 | ZFMK-DNA-FD04784202 |
| S471  | <i>Pholcus taarab</i>                  | MG267692 | MG267984 | MG268311 |          | MG268827 | MG269161 | ZFMK-DNA-FD04784386 |
| P0155 | <i>Pholcus taita</i>                   | JX023768 | JX023861 | JX023958 |          |          | JX023620 | ZFMK-DNA-100446447  |
| S472  | <i>Pholcus tambunan</i>                | MG267693 | MG267985 |          | MG268576 | MG268856 |          | ZFMK-DNA-FD04784394 |
| S272  | <i>Pholcus tanahrata</i>               | MG267536 | MG267811 |          |          | MG268913 |          | ZFMK-DNA-FD04784162 |
| P0258 | <i>Pholcus twa</i>                     | JX023833 | JX023928 | JX024039 |          |          | JX023689 | ZFMK-DNA-100437912  |
| S269  | <i>Pholcus ubin</i>                    | MG267533 | MG267809 | MG268139 | MG268453 | MG268840 | MG269153 | ZFMK-DNA-FD04784233 |
| GB49  | <i>Pholcus uludong</i>                 |          |          |          |          | MG268914 |          |                     |
| S270  | <i>Pholcus uludong</i>                 | MG267534 |          | MG268140 | MG268454 |          |          | ZFMK-DNA-FD04784241 |
| S473  | <i>Pholcus wahehe</i>                  | MG267694 | MG267986 |          |          | MG268864 | MG269166 | ZFMK-DNA-FD04784402 |
| JA71  | <i>Physocyclus dugesi</i>              | MG267437 |          | MG268106 | MG268383 | DQ667928 |          | ZFMK-DNA05-JA71     |
| S474  | <i>Physocyclus enaulus</i>             | MG267695 |          | MG268312 |          | MG268722 |          | ZFMK-DNA-FD04784410 |
| JA70  | <i>Physocyclus franckei</i>            | MG267482 | DQ667825 | MG268105 | MG268423 | DQ667930 |          | ZFMK-DNA05-JA70     |
| BB21  | <i>Physocyclus globosus</i>            | AY560712 |          |          | AY560751 | AY560788 |          |                     |
| OG29  | <i>Pimoa breuili</i>                   |          | JN010167 | JN010185 | JN010190 |          |          |                     |
| OG32  | <i>Pimoa sp</i>                        |          | FJ607471 | FJ607510 | FJ607545 | FJ607584 | FJ607622 |                     |
| S475  | <i>Pisaboa silvae</i>                  | MG267696 | MG267987 | MG268313 | MG268577 |          |          | ZFMK-DNA-FD04784418 |
| S372  | <i>Platnicknia Cu12-100</i>            |          | MG267904 | MG268227 | MG268509 | MG268702 | MG269020 | ZFMK-DNA-FD04784274 |
| S115  | <i>Platnicknia Cu12-2</i>              |          |          | MG268116 |          | MG268703 |          | ZFMK-DNA-FD04784107 |
| S373  | <i>Platnicknia Cu12-61</i>             | MG267590 | MG267905 | MG268226 | MG268510 | MG268704 | MG269021 | ZFMK-DNA-FD04784282 |
| S374  | <i>Platnicknia Cu12-99</i>             |          | MG267906 | MG268228 |          | MG268699 | MG269018 | ZFMK-DNA-FD04784290 |
| IA07  | <i>Platnicknia incerta</i>             |          | MG268021 |          |          | MG268701 |          |                     |
| S114  | <i>Platnicknia incerta</i>             |          |          |          |          | MG268700 | MG269019 | ZFMK-DNA-FD04784099 |
| OG15  | <i>Plectreurus tristis</i>             |          | FJ607472 | FJ607511 | FJ607546 | FJ607585 | FJ607623 |                     |
| JA80  | <i>Priscula Astr07</i>                 |          | DQ667838 |          |          | DQ667853 |          | ZFMK-DNA-FC17941458 |
| JA114 | <i>Priscula binghamae</i>              |          | DQ667827 |          |          | DQ667932 |          | ZFMK-DNA-FC17941445 |
| JA22  | <i>Priscula Ven02/80-85</i>            |          | DQ667828 |          | DQ667850 | DQ667933 |          | ZFMK-DNA-FC17941286 |
| S307  | <i>Priscula Ven02/80-85</i>            |          | MG267841 |          | MG268533 |          | MG268972 | ZFMK-DNA-FD04784332 |
| S476  | <i>Priscula venezuelana</i>            | MG267697 | MG267988 | MG268314 |          | MG268867 |          | ZFMK-DNA-FD04784426 |
| S477  | <i>Psilochorus concolor</i>            |          |          | MG268315 | MG268578 |          |          | ZFMK-DNA-FD04784434 |
| S046  | <i>Psilochorus imitatus</i>            | MG267426 | MG267771 | MG268040 |          |          |          | ZFMK-DNA-FD04784135 |
| BB24  | <i>Psilochorus imitatus=sp.1 Bruvo</i> | AY560715 |          |          | AY560754 | AY560790 |          |                     |
| S478  | <i>Psilochorus pallidulus</i>          | MG267715 | MG267989 | MG268316 |          | MG268628 |          | ZFMK-DNA-FD04784442 |
| P0210 | <i>Psilochorus SA Br10-36</i>          | JX023810 | JX023901 | JX024001 | JX024109 | JX023586 | JX023661 | ZFMK-DNA-100446406  |
| S032  | <i>Psilochorus SA Br11-40</i>          |          | MG267770 | MG268065 | MG268367 | MG268706 |          | ZFMK-DNA-FD04784118 |
| BB12a | <i>Psilochorus SA itaguyrussu</i>      | AY560701 | AY560672 |          | AY560740 | AY560782 |          |                     |
| P0219 | <i>Psilochorus SA itaguyrussu</i>      |          |          | JX024007 | JX024113 | JX023593 | JX023670 | ZFMK-DNA-100446394  |
| BB23  | <i>Psilochorus simoni</i>              | AY560714 |          |          | AY560753 | AY560789 |          |                     |
| BB25  | <i>Quamtana bonamanzi</i>              | AY560719 |          |          | AY560757 |          |          |                     |



| code  | species                           | 12S      | 16S      | 18S      | 28S      | CO1      | H3       | biobank             |
|-------|-----------------------------------|----------|----------|----------|----------|----------|----------|---------------------|
| GB50  | <i>Quamtana bonamanzi</i>         |          |          |          |          | MG268745 |          |                     |
| P0183 | <i>Quamtana Cam117</i>            | JX023793 | JX023883 | JX023978 | JX024086 | JX023567 | JX023641 | ZFMK-DNA-100446427  |
| S291  | <i>Quamtana CAS5</i>              | MG267547 | MG267827 | MG268156 | MG268470 | MG268806 | MG269148 | ZFMK-DNA-FD04784219 |
| P0241 | <i>Quamtana CAS7</i>              | JX023825 |          | JX024028 | JX024127 |          | JX023683 | ZFMK-DNA-100433857  |
| BB26  | <i>Quamtana embuleni</i>          | AY560721 |          |          | AY560759 | AY560793 |          |                     |
| P0285 | <i>Quamtana filmeri</i>           |          | JX023948 |          |          | JX023607 | JX023711 | ZFMK-DNA-100437878  |
| P0262 | <i>Quamtana kabale</i>            |          |          | JX024042 |          |          | JX023693 | ZFMK-DNA-100437901  |
| S063  | <i>Quamtana kitahurira</i>        |          |          | MG268075 |          |          | MG269138 | ZFMK-DNA-FD04784065 |
| P0204 | <i>Quamtana nyahururu</i>         |          | JX023896 | JX023996 | JX024104 | JX023581 | JX023655 | ZFMK-DNA-100446400  |
| P0243 | <i>Quamtana nylsvley?</i>         | JX023827 |          | JX024029 | JX024128 |          | JX023684 | ZFMK-DNA-100433809  |
| P0170 | <i>Quamtana oku</i>               | JX023782 | JX023871 | JX023971 | JX024080 |          | JX023630 | ZFMK-DNA-100446443  |
| P0284 | <i>Quamtana umzinto</i>           |          |          | JX024060 |          |          | JX023710 | ZFMK-DNA-100433855  |
| BB27  | <i>Quamtana vidal</i>             | AY560720 |          |          | AY560758 | AY560792 |          |                     |
| OG3   | <i>Rhode scutiventris</i>         |          | EU139684 |          | EU139822 | EU139636 | EU139754 |                     |
| S279  | <i>Savarna kaeo</i>               |          | MG267818 | MG268145 | MG268459 |          |          | ZFMK-DNA-FD04784218 |
| S278  | <i>Savarna krabriensis</i>        |          | MG267817 | MG268144 | MG268458 | MG268939 |          | ZFMK-DNA-FD04784210 |
| S306  | <i>Savarna miser</i>              |          | MG267840 | MG268168 | MG268479 | MG268942 |          | ZFMK-DNA-FD04784324 |
| S280  | <i>Savarna tessellata</i>         |          |          | MG268146 | MG268460 | MG268760 |          | ZFMK-DNA-FD04784226 |
| S281  | <i>Savarna thaleban</i>           |          | MG267819 | MG268147 | MG268461 | MG268941 |          | ZFMK-DNA-FD04784234 |
| OG25  | <i>Segestria bavarica</i>         | AY560731 |          |          | AY560765 | AY560802 |          |                     |
| OG21  | <i>Sicarius terrosus</i>          |          | EU817810 |          | EU817740 | EU817704 |          |                     |
| S504  | <i>Sihala ceylonica</i>           | MG267722 | MG268011 | MG268339 | MG268602 | MG268845 | MG269168 | ZFMK-DNA-FD05101712 |
| S505  | <i>Sihala SL43</i>                | MG267723 | MG268012 | MG268340 |          | MG268829 | MG269167 | ZFMK-DNA-FD05101720 |
| S506  | <i>Sihala SL63</i>                | MG267724 | MG268013 | MG268341 | MG268603 | MG268846 | MG269169 | ZFMK-DNA-FD05101728 |
| GB51  | <i>Smeringopina ankasa</i>        |          |          |          |          | MG268634 |          |                     |
| S054  | <i>Smeringopina ankasa</i>        |          | MG267772 | MG268081 |          |          |          | ZFMK-DNA-FD04784096 |
| P0173 | <i>Smeringopina attuleh</i>       |          | JX023874 |          |          |          | JX023633 | ZFMK-DNA-100446440  |
| S491  | <i>Smeringopina bamenda</i>       | MG267710 | MG267997 |          |          |          | MG269120 | ZFMK-DNA-FD05101703 |
| GB14  | <i>Smeringopina bayaka</i>        |          |          |          |          | MG268662 |          |                     |
| GB15  | <i>Smeringopina belinga</i>       |          |          |          |          | MG268665 |          |                     |
| P0152 | <i>Smeringopina bineti</i>        | JX023765 | JX023858 |          |          |          | JX023617 | ZFMK-DNA-100446461  |
| S300  | <i>Smeringopina bomfobiri</i>     | MG267554 | MG267834 | MG268163 |          | MG268633 | MG269118 | ZFMK-DNA-FD04784276 |
| S492  | <i>Smeringopina bwiti</i>         | MG267711 | MG267998 |          |          | MG268659 | MG269068 | ZFMK-DNA-FD05101711 |
| S042  | <i>Smeringopina camerunensis</i>  |          | MG267773 | MG268079 |          |          |          | ZFMK-DNA-FD04784103 |
| GB16  | <i>Smeringopina chaillu</i>       |          |          |          |          | MG268663 |          |                     |
| S404  | <i>Smeringopina djidji</i>        | MG267602 | MG267930 | MG268220 |          | MG268666 | MG269069 | ZFMK-DNA-FD04784428 |
| GB52  | <i>Smeringopina ebolowa</i>       |          |          |          |          | MG268668 |          |                     |
| P0175 | <i>Smeringopina ebolowa</i>       | JX023786 | JX023876 |          |          |          | JX023635 | ZFMK-DNA-100446438  |
| GB17  | <i>Smeringopina essotah</i>       |          |          |          |          | MG268664 |          |                     |
| GB18  | <i>Smeringopina fang</i>          |          |          |          |          | MG268654 |          |                     |
| P0153 | <i>Smeringopina guineensis</i>    | JX023766 | JX023859 |          |          | JX023550 | JX023618 | ZFMK-DNA-100446114  |
| GB19  | <i>Smeringopina iboga</i>         |          |          |          |          | MG268645 |          |                     |
| S041  | <i>Smeringopina kala</i>          | MG267459 | MG267774 | MG268078 | MG268387 | MG268622 | MG269119 | ZFMK-DNA-FD04784095 |
| S402  | <i>Smeringopina kinguele</i>      | MG267600 | MG267928 | MG268219 | MG268527 |          | MG269181 | ZFMK-DNA-FD04784412 |
| S044  | <i>Smeringopina kribi</i>         | MG267460 | MG267775 | MG268080 |          | MG268660 |          | ZFMK-DNA-FD04784119 |
| GB20  | <i>Smeringopina lekoni</i>        |          |          |          |          | MG268652 |          |                     |
| S043  | <i>Smeringopina mbouda</i>        |          | MG267776 | MG268082 |          |          | MG269066 | ZFMK-DNA-FD04784111 |
| S403  | <i>Smeringopina mohoba</i>        | MG267601 | MG267929 |          |          | MG268655 | MG269182 | ZFMK-DNA-FD04784420 |
| S049  | <i>Smeringopina moudouma</i>      | MG267462 | MG267777 | MG268077 | MG268386 |          |          | ZFMK-DNA-FD04784151 |
| GB21  | <i>Smeringopina ndjole</i>        |          |          |          |          | MG268644 |          |                     |
| P0180 | <i>Smeringopina nyasoso</i>       | JX023790 | JX023880 |          |          | JX023565 | JX023639 | ZFMK-DNA-100446424  |
| S405  | <i>Smeringopina ogooue</i>        | MG267603 | MG267931 |          |          | MG268669 | MG269070 | ZFMK-DNA-FD04784436 |
| GB22  | <i>Smeringopina sahoue</i>        |          |          |          |          | MG268658 |          |                     |
| S493  | <i>Smeringopina simintang</i>     | MG267716 | MG267999 | MG268329 |          | MG268667 |          | ZFMK-DNA-FD05101719 |
| S301  | <i>Smeringopina tchimbele</i>     |          | MG267835 | MG268164 |          | MG268661 | MG269067 | ZFMK-DNA-FD04784284 |
| GB54  | <i>Smeringopina tebe</i>          |          |          |          |          | MG268653 |          |                     |
| S050  | <i>Smeringopina tebe</i>          | MG267461 | MG267778 | MG268076 |          |          |          | ZFMK-DNA-FD04784064 |
| S017  | <i>Smeringopus arambourgi</i>     | MG267458 | MG267779 | MG268039 | MG268382 |          | MG269061 | ZFMK-DNA-FD04784101 |
| P0224 | <i>Smeringopus atomarius?</i>     |          | JX023910 | JX024012 | JX024117 |          | JX023673 | ZFMK-DNA-100446389  |
| P0266 | <i>Smeringopus bujongolo</i>      | JX023837 | JX023933 | JX024045 |          |          | JX023697 | ZFMK-DNA-100437897  |
| P0161 | <i>Smeringopus chogoria</i>       | JX023774 | JX023866 | JX023963 |          |          |          | ZFMK-DNA-100446453  |
| P0143 | <i>Smeringopus cylindrogaster</i> |          | JX023850 | JX023951 | JX024064 |          |          | ZFMK-DNA-100446470  |
| P0178 | <i>Smeringopus cylindrogaster</i> |          | JX023878 | JX023975 | JX024084 |          |          | ZFMK-DNA-100446102  |
| GB24  | <i>Smeringopus isangi</i>         |          |          |          |          | MG268870 |          |                     |
| S407  | <i>Smeringopus lesserti</i>       | MG267605 | MG267933 | MG268222 | MG268530 | MG268871 | MG269062 | ZFMK-DNA-FD04784357 |
| S408  | <i>Smeringopus lotzi</i>          | MG267606 | MG267934 | MG268223 | MG268529 | MG268872 | MG269063 | ZFMK-DNA-FD04784365 |
| P0257 | <i>Smeringopus mgahinga</i>       |          | JX023927 | JX024038 |          |          | JX023688 | ZFMK-DNA-100437911  |

| code  | species                                 | 12S      | 16S      | 18S      | 28S      | CO1      | H3       | biobank             |
|-------|-----------------------------------------|----------|----------|----------|----------|----------|----------|---------------------|
| P0265 | <i>Smeringopus mpanga</i>               |          | JX023932 |          |          |          | JX023696 | ZFMK-DNA-100433856  |
| BB28  | <i>Smeringopus natalensis</i>           | AY560717 |          |          | AY560755 |          |          |                     |
| P0157 | <i>Smeringopus ngangao</i>              | JX023770 | JX023863 | JX023960 | JX024073 |          |          | ZFMK-DNA-100446449  |
| P0264 | <i>Smeringopus pallidus</i>             | JX023836 | JX023931 | JX024044 | JX024136 |          | JX023695 | ZFMK-DNA-100437899  |
| S406  | <i>Smeringopus peregrinoides</i>        | MG267604 | MG267932 | MG268221 | MG268528 |          | MG269060 | ZFMK-DNA-FD04784349 |
| P0227 | <i>Smeringopus similis?</i>             | JX023820 | JX023912 | JX024015 | JX024119 |          | JX023675 | ZFMK-DNA-100446129  |
| GB55  | <i>Spermophora akwamu</i>               |          |          |          |          | MG268747 |          |                     |
| S018  | <i>Spermophora akwamu</i>               | MG267457 |          | MG268042 |          |          | MG269055 | ZFMK-DNA-FD04784109 |
| P0187 | <i>Spermophora awalai</i>               | JX023797 |          | JX023982 | JX024089 | JX023570 | JX023644 | ZFMK-DNA-100446431  |
| GB56  | <i>Spermophora bukusu</i>               |          |          |          |          | MG268678 |          |                     |
| P0273 | <i>Spermophora bukusu</i>               | JX023842 | JX023939 | JX024049 |          |          |          | ZFMK-DNA-100437879  |
| S376  | <i>Spermophora cf akwamu</i>            | MG267614 | MG267902 | MG268236 | MG268507 | MG268746 | MG269056 | ZFMK-DNA-FD04784306 |
| GB27  | <i>Spermophora dieke</i>                |          |          |          |          | MG268748 |          |                     |
| S055  | <i>Spermophora dieke</i>                | MG267456 | MG267780 | MG268043 |          |          |          | ZFMK-DNA-FD04784104 |
| S019  | <i>Spermophora estebani</i>             | MG267454 |          | MG268072 | MG268369 |          | MG269058 | ZFMK-DNA-FD04784117 |
| S375  | <i>Spermophora Ind27</i>                | MG267624 | MG267903 | MG268241 | MG268519 | MG268743 | MG269185 | ZFMK-DNA-FD04784298 |
| S335  | <i>Spermophora Ind90</i>                | MG267634 | MG267882 | MG268212 | MG268493 | MG268891 | MG269057 | ZFMK-DNA-FD04784263 |
| P0189 | <i>Spermophora kirinyaga</i>            | JX023798 |          | JX023984 | JX024091 |          |          | ZFMK-DNA-100446433  |
| GB57  | <i>Spermophora kyambura</i>             |          |          |          |          | MG268877 |          |                     |
| P0174 | <i>Spermophora kyambura</i>             | JX023785 | JX023875 | JX023972 |          |          | JX023634 | ZFMK-DNA-100446439  |
| P0263 | <i>Spermophora kyambura</i>             | JX023835 | JX023930 | JX024043 |          |          | JX023694 | ZFMK-DNA-100437900  |
| P0184 | <i>Spermophora maathaiaie</i>           | JX023794 | JX023884 | JX023979 | JX024087 | JX023568 |          | ZFMK-DNA-100446428  |
| S282  | <i>Spermophora Mal2</i>                 |          |          | MG268148 | MG268462 | MG268889 | MG269184 | ZFMK-DNA-FD04784242 |
| GB58  | <i>Spermophora mau</i>                  |          |          |          |          | MG268679 |          |                     |
| P0275 | <i>Spermophora mau</i>                  | JX023844 |          | JX024051 | JX024140 |          | JX023703 | ZFMK-DNA-100437881  |
| P0164 | <i>Spermophora minotaura</i>            | JX023777 | JX023869 | JX023965 | JX024077 | JX023557 | JX023624 | ZFMK-DNA-100446456  |
| P0186 | <i>Spermophora minotaura</i>            | JX023796 |          | JX023981 | JX024088 | JX023569 | JX023643 | ZFMK-DNA-100446430  |
| P0272 | <i>Spermophora minotaura</i>            |          | JX023938 | JX024048 | JX024139 | JX023604 | JX023702 | ZFMK-DNA-100433830  |
| P0278 | <i>Spermophora minotaura</i>            |          | JX023943 | JX024054 | JX024143 |          | JX023706 | ZFMK-DNA-100437884  |
| P0226 | <i>Spermophora MRAC525</i>              |          |          | JX024014 | JX024118 |          |          | ZFMK-DNA-100446118  |
| S020  | <i>Spermophora Phi109</i>               | MG267453 |          | MG268071 |          |          | MG269059 | ZFMK-DNA-FD04784125 |
| BB29  | <i>Spermophora senoculata</i>           | AY560718 |          |          | AY560756 | AY560791 |          |                     |
| S311  | <i>Spermophora senoculata</i>           | MG267557 | MG267844 |          | MG268483 | MG268642 |          | ZFMK-DNA-FD04784269 |
| S479  | <i>Spermophora tonkoui</i>              | MG267698 | MG267990 | MG268317 |          | MG268882 | MG269121 | ZFMK-DNA-FD04784355 |
| GB59  | <i>Spermophora ziama</i>                |          |          |          |          | MG268792 |          |                     |
| P0185 | <i>Spermophora ziama</i>                | JX023795 |          | JX023980 |          |          | JX023642 | ZFMK-DNA-100446429  |
| P0256 | <i>Spermophorides cuneata</i>           |          |          | JX024037 | JX024133 |          |          | ZFMK-DNA-100437910  |
| NA001 | <i>Spermophorides fuerteventurensis</i> |          |          |          | MG268611 | MG268903 |          |                     |
| NA002 | <i>Spermophorides mercedes</i>          |          |          |          | MG268612 | MG268902 |          |                     |
| S308  | <i>Stenosfemuraia cuadrata</i>          |          | MG267842 | MG268169 | MG268480 | MG268707 |          | ZFMK-DNA-FD04784340 |
| S108  | <i>Stygopholcus absoloni?</i>           | MG267487 |          | MG268112 | MG268428 | MG268938 |          | ZFMK-DNA-FD04784154 |
| S109  | <i>Stygopholcus absoloni?</i>           | MG267488 |          |          |          | MG268936 |          | ZFMK-DNA-FD04784067 |
| S112  | <i>Stygopholcus absoloni?</i>           | MG267490 |          | MG268114 | MG268430 | MG268937 |          | ZFMK-DNA-FD04784083 |
| S110  | <i>Stygopholcus Bal3</i>                | MG267489 |          | MG268113 | MG268429 | MG268935 |          | ZFMK-DNA-FD04784075 |
| S317  | <i>Stygopholcus photophilus</i>         | MG267561 | MG267850 | MG268173 |          | MG268934 | MG269114 | ZFMK-DNA-FD04784317 |
| BB31  | <i>Systemita prasina</i>                | AY560722 |          |          | AY560761 |          |          |                     |
| JA88  | <i>Systemita prasina</i>                |          |          |          |          | DQ667939 |          | ZFMK-DNA-FC17941427 |
| JA131 | <i>Tainonia samana</i>                  |          | FJ799766 |          |          | FJ799781 |          | ZFMK-DNA-FC17941391 |
| S480  | <i>Tainonia serripes</i>                | MG267699 | MG268003 | MG268318 |          | MG268670 | MG269127 | ZFMK-DNA-FD04784363 |
| JA134 | <i>Tainonia visite</i>                  |          | FJ799769 |          |          | FJ799782 |          | ZFMK-DNA-FC17941415 |
| OG31  | <i>Tetragnatha versicolor_A</i>         | EU003246 |          |          | EU003429 | EU003308 |          |                     |
| S302  | <i>Trichocyclus balladong</i>           | MG267555 | MG267836 | MG268165 |          | MG268635 |          | ZFMK-DNA-FD04784292 |
| BB32  | <i>Trichocyclus cf balladong</i>        | AY560686 | AY560664 |          | AY560733 | AY560772 |          |                     |
| S303  | <i>Trichocyclus cf warianga</i>         | MG267556 | MG267837 | MG268166 | MG268477 |          |          | ZFMK-DNA-FD04784300 |
| S384  | <i>Tupigea ale</i>                      | MG267591 | MG267909 |          |          | MG268720 | MG269190 | ZFMK-DNA-FD04784275 |
| JA48  | <i>Tupigea angelim</i>                  |          | DQ667834 |          |          | DQ667941 |          | ZFMK-DNA-FC17941304 |
| S481  | <i>Tupigea angelim</i>                  | MG267700 |          | MG268319 | MG268579 |          | MG269187 | ZFMK-DNA-FD04784371 |
| S494  | <i>Tupigea Br10-32</i>                  | MG267712 | MG268000 | MG268330 |          | MG268759 |          | ZFMK-DNA-FD05101727 |
| S411  | <i>Tupigea Br10-40</i>                  | MG267609 | MG267923 |          |          | MG268721 | MG269191 | ZFMK-DNA-FD04784389 |
| S409  | <i>Tupigea Br14-47</i>                  | MG267607 |          | MG268224 |          | MG268719 | MG269189 | ZFMK-DNA-FD04784373 |
| JA13  | <i>Tupigea cantareira</i>               |          | DQ667835 |          |          | DQ667942 |          | ZFMK-DNA-FC17941309 |
| P0218 | <i>Tupigea maza</i>                     |          | JX023907 | JX024006 |          |          | JX023669 | ZFMK-DNA-100446395  |
| P0214 | <i>Tupigea nadleri</i>                  |          | JX023904 | JX024002 | JX024110 | JX023589 | JX023665 | ZFMK-DNA-100446410  |
| GB30  | <i>Tupigea paula</i>                    |          |          |          |          | MG268716 |          |                     |
| S377  | <i>Tupigea penedo</i>                   | MG267615 |          | MG268243 | MG268518 | MG268717 |          | ZFMK-DNA-FD04784314 |

| code  | species                     | 12S      | 16S      | 18S      | 28S      | CO1      | H3       | biobank             |
|-------|-----------------------------|----------|----------|----------|----------|----------|----------|---------------------|
| S385  | <i>Tupigea teresopolis?</i> | MG267616 | MG267910 |          |          | MG268718 | MG269188 | ZFMK-DNA-FD04784283 |
| OG12  | <i>Uloborus glomosus</i>    | EU003247 |          | EU003366 | EU003438 | EU003310 | EU003340 |                     |
| OG13  | <i>Uroctea durandi</i>      |          |          | FJ948939 | FJ948980 | FJ949021 | FJ949058 |                     |
| S283  | <i>Uthina huifengi?</i>     | MG267541 | MG267820 | MG268149 | MG268463 | MG268962 |          | ZFMK-DNA-FD04784250 |
| S378  | <i>Uthina Ind119</i>        | MG267585 |          | MG268254 | MG268539 | MG268961 |          | ZFMK-DNA-FD04784322 |
| S379  | <i>Uthina Ind121</i>        | MG267586 |          | MG268255 | MG268540 | MG268957 |          | ZFMK-DNA-FD04784330 |
| S380  | <i>Uthina Ind67</i>         | MG267587 |          | MG268256 | MG268541 | MG268960 |          | ZFMK-DNA-FD04784338 |
| S284  | <i>Uthina khaosokensis</i>  |          | MG267821 | MG268150 | MG268464 | MG268966 |          | ZFMK-DNA-FD04784163 |
| S102  | <i>Uthina luzonica</i>      | MG267483 |          |          | MG268425 | MG268964 |          | ZFMK-DNA-FD04784114 |
| S217  | <i>Uthina luzonica</i>      |          |          | MG268120 | MG268420 | MG268963 |          | ZFMK-DNA-FD04784229 |
| S285  | <i>Uthina ratchaburi</i>    | MG267542 | MG267822 | MG268151 | MG268465 | MG268965 |          | ZFMK-DNA-FD04784171 |
| SB052 | <i>Wanniyala agrabopath</i> | MG267731 |          | MG268348 |          | MG268946 |          |                     |
| S022  | <i>Wanniyala SL71</i>       |          | MG267781 | MG268053 |          |          |          | ZFMK-DNA-FD04784141 |
| SB063 | <i>Wanniyala SL61</i>       | MG267732 |          | MG268349 |          |          | MG269088 |                     |
| S507  | <i>Wanniyala SL38</i>       | MG267725 | MG268014 | MG268342 | MG268604 | MG268944 | MG269089 | ZFMK-DNA-FD05101736 |
| S508  | <i>Wanniyala SL55</i>       |          | MG268015 | MG268343 | MG268605 | MG268943 | MG269090 | ZFMK-DNA-FD05101744 |
| S509  | <i>Wanniyala SL61</i>       | MG267726 | MG268016 | MG268344 | MG268606 | MG268945 |          | ZFMK-DNA-FD05101752 |
| S304  | <i>Waunana modesta?</i>     |          | MG267838 |          | MG268478 |          | MG269013 | ZFMK-DNA-FD04784308 |
| S293  | <i>Wugigarra kalamai</i>    | MG267548 | MG267828 | MG268157 |          |          |          | ZFMK-DNA-FD04784227 |
| S233  | <i>Wugigarra QMB5</i>       |          |          | MG268093 |          |          | MG268971 | ZFMK-DNA-FD04784159 |
| P0251 | <i>Wugigarra undanbi</i>    |          | JX023926 | JX024035 | JX024131 |          | JX023686 | ZFMK-DNA-100433838  |
| S232  | <i>Wugigarra yawai</i>      | MG267471 | MG267784 | MG268092 | MG268401 | MG268749 | MG268973 | ZFMK-DNA-FD04784246 |
| S381  | <i>Wugigarra? Ind107</i>    | MG267568 |          | MG268192 |          | MG268613 | MG269053 | ZFMK-DNA-FD04784346 |
| S495  | <i>Wugigarra? Ind117</i>    | MG267713 | MG268001 | MG268331 |          | MG268751 |          | ZFMK-DNA-FD05101735 |
| S382  | <i>Wugigarra? Ind82</i>     | MG267569 | MG267880 | MG268247 |          | MG268750 | MG269054 | ZFMK-DNA-FD04784259 |
| S496  | <i>Wugigarra? Ind96</i>     | MG267714 | MG268002 | MG268332 |          | MG268740 |          | ZFMK-DNA-FD05101743 |
| P0240 | <i>Zatavua analalava?</i>   | JX023824 | JX023921 | JX024027 | JX024126 |          |          | ZFMK-DNA-100433837  |
| S045  | <i>Zatavua CAS8</i>         |          | MG267782 | MG268034 | MG268366 |          |          | ZFMK-DNA-FD04784127 |
| OG33  | <i>Zygiella x-notata</i>    | EU003248 | EU003251 | EU003367 | EU003431 | EU003311 | EU003341 |                     |

**Table S2:** Sampling localities along with decimal coordinates (WGS84) and the biome in which the majority of the available species records occurred. Biomes codes correspond to Olson et al. (2001): (A) Tropical & Subtropical Moist Broadleaf Forests; (B) Tropical & Subtropical Dry Broadleaf Forests; (C) Tropical & Subtropical Coniferous Forests; (D) Temperate Broadleaf & Mixed Forests; (E) Temperate Conifer Forests; (G) Tropical & Subtropical Grasslands, Savannas & Shrublands; (H) Temperate Grasslands, Savannas & Shrublands; (I) Flooded Grasslands & Savannas; (J) Montane Grasslands & Shrublands; (L) Mediterranean Forests, Woodlands & Scrub; (M) Deserts & Xeric Shrublands; (N) Mangroves.

| code  | species                      | locality                                                                                                        | latitude | longitude | biome |
|-------|------------------------------|-----------------------------------------------------------------------------------------------------------------|----------|-----------|-------|
| S067  | <i>Aetana abadae</i>         | Philippines, Negros, Negros Oriental Prov., Casaroro Falls                                                      | 9.281    | 123.208   | A     |
| S015  | <i>Aetana baganihan</i>      | Philippines, Mindanao, Marilog Distr., Baganihan                                                                | 7.469    | 125.25    | A     |
| S075  | <i>Aetana banahaw</i>        | Philippines, Luzon, Mt. Banahaw, forest near Taytay Falls                                                       | 14.11    | 121.507   | A     |
| GB01  | <i>Aetana gaya</i>           | Malaysia, Sabah, Gaya Island                                                                                    | 6.016    | 116.02    | A     |
| S330  | <i>Aetana Ind101</i>         | Indonesia, West Papua, Manokwari, Gunung Meja                                                                   | -0.86    | 134.084   | A     |
| S331  | <i>Aetana Ind114</i>         | Indonesia, Ternate, at Danau Tolire (lake)                                                                      | 0.83     | 127.311   | A     |
| S119  | <i>Aetana indah</i>          | Malaysia, Sabah, Crocker Range between Kota Kinabalu and Tambunan, N-slope                                      | 5.834    | 116.336   | A/J   |
| S117  | <i>Aetana kinabalu</i>       | Malaysia, Sabah, Mt. Kinabalu, forest along Silau Silau Trail                                                   | 6.014    | 116.54    | J     |
| S221  | <i>Aetana kiukoki</i>        | Philippines, Camiguin, Mt. Hibok Hibok                                                                          | 9.196    | 124.692   | A     |
| S223  | <i>Aetana kiukoki</i>        | Philippines, Mindanao, Marilog Distr., Baganihan                                                                | 7.469    | 125.25    | A     |
| GB04  | <i>Aetana lambir</i>         | Malaysia, Sarawak, Lambir Hills NP                                                                              | 4.203    | 114.04    | A     |
| S121  | <i>Aetana lambir</i>         | Malaysia, Sarawak, Lambir Hills NP                                                                              | 4.203    | 114.04    | A     |
| S080  | <i>Aetana libjo</i>          | Philippines, Dinagat, Paragua Forest, 'site 1'                                                                  | 10.222   | 125.553   | A     |
| GB31  | <i>Aetana loboc</i>          | Philippines, Bohol, near Loboc, above Loboc River                                                               | 9.651    | 124.022   | A     |
| S069  | <i>Aetana loboc</i>          | Philippines, Bohol, near Loboc, above Loboc River                                                               | 9.651    | 124.022   | A     |
| S077  | <i>Aetana lozadae</i>        | Philippines, Luzon, Mt. Isarog, W slope                                                                         | 13.664   | 123.34    | A     |
| GB32  | <i>Aetana manansalai</i>     | Philippines, Luzon, between Lucban and Tayabas                                                                  | 14.063   | 121.567   | A     |
| S073  | <i>Aetana manansalai</i>     | Philippines, Luzon, between Lucban and Tayabas                                                                  | 14.063   | 121.567   | A     |
| GB70  | <i>Aetana ocampoi-morphA</i> | Philippines, Luzon, Mt. Isarog, W slope                                                                         | 13.664   | 123.34    | A     |
| S007  | <i>Aetana ocampoi-morphA</i> | Philippines, Luzon, Mt. Isarog, W slope                                                                         | 13.664   | 123.34    | A     |
| S008  | <i>Aetana ocampoi-morphB</i> | Philippines, Luzon, Mt. Isarog, W slope                                                                         | 13.664   | 123.34    | A     |
| GB02  | <i>Aetana omayan</i>         | Philippines, Luzon, Baguio, Crystal Cave                                                                        | 16.396   | 120.572   | C     |
| S001  | <i>Aetana omayan</i>         | Philippines, Luzon, Baguio, Crystal Cave                                                                        | 16.396   | 120.572   | C     |
| S079  | <i>Aetana paragua</i>        | Philippines, Dinagat, Paragua Forest, 'site 1'                                                                  | 10.222   | 125.553   | A     |
| S118  | <i>Aetana poring</i>         | Malaysia, Sabah, Mt. Kinabalu, forest above Kinabalu Mountain Lodge                                             | 6.013    | 116.534   | J     |
| OG26  | <i>Agelenopsis aperta</i>    | -                                                                                                               |          |           | na    |
| S002  | <i>Anansus atewa</i>         | Ghana, Eastern Region, Atewa Hills, Atewa Atwirebu Reserve                                                      | 6.231    | -0.558    | A     |
| S286  | <i>Anansus ewe</i>           | Ghana, Central Region, Kakum National Park                                                                      | 5.348    | -1.384    | A     |
| P0190 | <i>Anansus kamwai</i>        | Cameroon, Northwest Region, near Bamenda                                                                        | 6.008    | 10.302    | A     |
| S309  | <i>Anopsicus Car127</i>      | Costa Rica, Heredia, La Selva Biol. Stn, 2014                                                                   | 10.423   | -84.022   | A     |
| S310  | <i>Anopsicus Car206</i>      | Jamaica, Trelawny Parish, Trail to Upper Windsor Cave                                                           | 18.348   | -77.647   | A     |
| S413  | <i>Anopsicus USA3</i>        | USA, Texas, Big Bend National Park, Cat Tail Fall                                                               | 29.273   | -103.336  | M     |
| OG7   | <i>Araneus diadematus</i>    | -                                                                                                               |          |           | na    |
| OG34  | <i>Argiope argentata</i>     | -                                                                                                               |          |           | na    |
| OG6   | <i>Ariadna fidicina</i>      | -                                                                                                               |          |           | na    |
| BB01  | <i>Artema atlanta</i>        | USA, Florida, Sarasota                                                                                          | 27.33    | -82.526   | SA    |
| JA119 | <i>Artema atlanta</i>        | Egypt, Cairo                                                                                                    | 30       | 31.25     | SA    |
| S312  | <i>Artema bunkpuruğu</i>     | Ghana, Northern Region, between Gambaga and Nakpanduri                                                          | 10.567   | -0.291    | G     |
| S326  | <i>Artema doriai</i>         | Israel, Judea and Samaria Distr., Memorial Ha-Biq'a, NE Peza'el                                                 | 32.052   | 35.459    | D     |
| GB03  | <i>Artema nephilit</i>       | Israel, Northern Distr., Mount Berenice, S Teverya (Tiberias)                                                   | 32.777   | 35.541    | na    |
| S325  | <i>Artema nephilit</i>       | Jordan, Ma'an Prov., Petra                                                                                      | 30.324   | 35.447    | na    |
| S497  | <i>Artema Om14</i>           | Oman, Ad Dakhiliya, W of Bahla                                                                                  | 22.934   | 57.084    | H     |
| S235  | <i>Artema sp.C</i>           | India, Rajasthan, Durjana                                                                                       | 29.008   | 74.822    | M     |
| S287  | <i>Artema sp.C</i>           | Sudan, Khartoum, Khartoum City                                                                                  | 15.55    | 32.55     | M     |
| S332  | <i>Artema transcaspica</i>   | Tajikistan, Khatton Area, Khushody                                                                              | 37.152   | 68.07     | M     |
| OG4   | <i>Austrochilus sp</i>       | -                                                                                                               |          |           | na    |
| S414  | <i>Aymaria Br16-188</i>      | Brazil, Acre, Cruzeiro do Sul, forest at Fazenda Colorado, 'site 2'                                             | -7.528   | -72.655   | A     |
| P0231 | <i>Belisana akebona</i>      | Japan, Tokushima Pref., Naka-gun, Naka-chô, Sawadani                                                            | 33.82    | 134.48    | D     |
| S238  | <i>Belisana aninaj</i>       | Thailand, Nakhon Si Thammarat, Khao Nan N.P., Tham Hong, 120 m a.s.l., degraded forest around cave, leaf litter | 8.733    | 98.635    | A     |
| S415  | <i>Belisana aninaj</i>       | Thailand, Nakhon Si Thammarat, Khao Nan N.P., Tham Hong, 120 m a.s.l., degraded forest around cave, leaf litter | 8.733    | 98.635    | A     |
| S230  | <i>Belisana australis</i>    | Philippines, Mindanao, Santo Domingo                                                                            | 7.782    | 125.397   | G     |
| S333  | <i>Belisana bohorok</i>      | Indonesia, Sumatra, Tangkahan, forest S of village                                                              | 3.677    | 98.071    | A     |
| S125  | <i>Belisana Bor121</i>       | Malaysia, Sarawak, Bako National Park, along Lintang Trail                                                      | 1.718    | 110.452   | A/N   |
| S243  | <i>Belisana Bor121</i>       | Singapore, MacRitchie Reservoir Park                                                                            | 1.355    | 103.813   | A/N   |
| S126  | <i>Belisana Bor147</i>       | Malaysia, Sabah, Mt. Kinabalu, forest above Kinabalu Mountain Lodge                                             | 6.013    | 116.534   | J     |
| S127  | <i>Belisana Bor152</i>       | Malaysia, Sabah, Gaya Island                                                                                    | 6.016    | 116.02    | A     |

| code  | species                        | locality                                                                                          | latitude | longitude | biome |
|-------|--------------------------------|---------------------------------------------------------------------------------------------------|----------|-----------|-------|
| S128  | <i>Belisana Bor160</i>         | Malaysia, Sabah, Crocker Range between Kota Kinabalu and Tambuan, N-slope                         | 5.834    | 116.336   | A     |
| S129  | <i>Belisana Bor85</i>          | Malaysia, Sarawak, near Kapit                                                                     | 1.941    | 112.907   | A     |
| S334  | <i>Belisana Ind15</i>          | Indonesia, Sumatra, forested doline near Baso Cave                                                | -0.252   | 100.482   | A     |
| S237  | <i>Belisana juncoae</i>        | Taiwan, Pingtung, near Chouqia                                                                    | 22.241   | 120.855   | A     |
| S239  | <i>Belisana ketambe?</i>       | Thailand, Narathiwat, Hala Bala Wildlife Sanctuary, 'site 1', forest at river near headquarters   | 5.797    | 101.832   | A     |
| S025  | <i>Belisana Benj44</i>         | Sri Lanka, Central Prov., Badulla Distr., Ohiya                                                   | 6.82     | 80.844    | A     |
| S241  | <i>Belisana khaoyai</i>        | Thailand, Krabi, Khao Phanom Bencha National Park, trails near headquarters                       | 8.235    | 98.918    | A/B   |
| S242  | <i>Belisana leuser</i>         | Thailand, Narathiwat, Hala Bala Wildlife Sanctuary, 'site 1', forest at river near headquarters   | 5.797    | 101.832   | A     |
| S244  | <i>Belisana Mal30</i>          | Malaysia, Johor, Gunung Ledang, forest near Puteri Falls                                          | 2.355    | 102.635   | A     |
| S416  | <i>Belisana Mal35</i>          | Malaysia, Johor, Gunung Ledang, forest near Puteri Falls                                          | 2.355    | 102.635   | A     |
| S246  | <i>Belisana Mal55</i>          | Malaysia, Pahang, Ulu Dong, forest near river                                                     | 3.942    | 102.027   | A     |
| S247  | <i>Belisana Mal76</i>          | Malaysia, Pahang, Cameron Highlands, near Tanah Rata, forest along 'trail 9'                      | 4.462    | 101.39    | A     |
| S248  | <i>Belisana Mal77</i>          | Malaysia, Pahang, Cameron Highlands, near Tanah Rata, forest along 'trail 9'                      | 4.462    | 101.39    | A     |
| S249  | <i>Belisana Mal91</i>          | Malaysia, Kedah, Gunung Jerai, forest near Sri Perigi Waterfall                                   | 5.808    | 100.408   | A     |
| S336  | <i>Belisana nahitanoj</i>      | Indonesia, Sulawesi, between Bantimurung and Kappang                                              | -5.049   | 119.738   | A     |
| S219  | <i>Belisana Phi80</i>          | Philippines, Dinagat, Paragua Forest, 'site 1'                                                    | 10.222   | 125.553   | A     |
| P0282 | <i>Belisana Raff32</i>         | Singapore, Bukit Timah Nature Reserve                                                             | 1.343    | 103.775   | A     |
| S417  | <i>Belisana ranong</i>         | Thailand, Ranong, Klong Nakha Wildlife Sanctuary                                                  | 9.46     | 98.512    | A     |
| S386  | <i>Belisana sabah</i>          | Malaysia, Sabah, Mt. Kinabalu, forest above Kinabalu Mountain Lodge                               | 6.013    | 116.534   | J     |
| S337  | <i>Belisana sandakan</i>       | Indonesia, Sumatra, forested doline near Baso Cave                                                | -0.252   | 100.482   | A     |
| S498  | <i>Belisana SL37</i>           | Sri Lanka, North Central Prov., Minneriya Forest                                                  | 8.047    | 80.832    | B     |
| S103  | <i>Belisana Tai4</i>           | Taiwan, Tainan, Shinhua National Forest                                                           | 23.024   | 120.358   | A     |
| S338  | <i>Belisana tambligan</i>      | Indonesia, Bali, Lake Tambligan, forest along SE side of lake                                     | -8.265   | 115.098   | A     |
| P0267 | <i>Buitinga batwa</i>          | Uganda, Kisoro Distr., Mgahinga Gorilla National Park, bamboo forest                              | -1.368   | 29.61     | A     |
| S339  | <i>Buitinga buhoma</i>         | Uganda, Kanungu Distr., Bwindi Impenetrable Forest National Park                                  | -1       | 29.618    | A     |
| P0259 | <i>Buitinga griswoldi</i>      | Uganda, Bushenyi Distr., Kasyoha-Kitomi Forest Reserve                                            | -0.268   | 30.152    | G     |
| P0191 | <i>Buitinga nigrescens?</i>    | Kenya, Eastern Prov., Ol Donyo Sabuk National Park                                                | -1.135   | 37.257    | G     |
| S340  | <i>Buitinga ruhiza</i>         | Uganda, Kanungu Distr., Bwindi Impenetrable Forest National Park                                  | -1       | 29.618    | A/G   |
| S341  | <i>Buitinga ruwenzori</i>      | Uganda, Kasese Distr., Ruwenzori Mts, near Nyabitaba Hut                                          | 0.358    | 29.978    | J     |
| S483  | <i>Buitinga Uga5</i>           | Uganda, Kasese Distr., Ruwenzori Mts, between Nyabitaba Hut and Guy Yeoman Hut                    | 0.35     | 29.95     | J     |
| S484  | <i>Buitinga Uga78</i>          | Uganda, Kabarole Distr., Kibale Forest National Park, forest near Makerere Univ. Research Station | 0.553    | 30.357    | A     |
| P0156 | <i>Buitinga wataita</i>        | Kenya, Coast Prov., Taita Hills, Ngangao Forest                                                   | -3.37    | 38.34     | A     |
| S251  | <i>Calapnita anai</i>          | Singapore, MacRitchie Reservoir Park                                                              | 1.355    | 103.813   | A     |
| S418  | <i>Calapnita bankirai</i>      | Indonesia, East Kalimantan, Bukit Bankirai                                                        | -1.029   | 116.867   | A     |
| S419  | <i>Calapnita bario</i>         | Malaysia, Sarawak, Bario, forest along river N of town                                            | 3.768    | 114.446   | A     |
| S420  | <i>Calapnita bidayuh</i>       | Malaysia, Sarawak, near Kapit                                                                     | 1.941    | 112.907   | A     |
| S421  | <i>Calapnita bohol</i>         | Philippines, Bohol, near Loboc, at Loboc River                                                    | 9.651    | 124.022   | A     |
| S133  | <i>Calapnita deelemanae</i>    | Malaysia, Sabah, Poring Hot Springs, forest near beginning of Kipungit Trail                      | 6.048    | 116.706   | A     |
| S485  | <i>Calapnita dinagat</i>       | Philippines, Dinagat, Paragua Forest, 'site 1'                                                    | 10.222   | 125.553   | A     |
| S184  | <i>Calapnita kubah</i>         | Malaysia, Sarawak, Kubah National Park, near entrance to Waterfall Trail                          | 1.606    | 110.187   | A     |
| S136  | <i>Calapnita lehi</i>          | Malaysia, Sarawak, Lambir Hills National Park                                                     | 4.203    | 114.04    | A     |
| S422  | <i>Calapnita loksado</i>       | Indonesia, South Kalimantan, Loksado                                                              | -2.796   | 115.503   | A     |
| S227  | <i>Calapnita numezae</i>       | Philippines, Mindanao, Mt. Matutum, Kawit Forest, 'site 1'                                        | 6.338    | 125.104   | A     |
| S134  | <i>Calapnita phyllicola</i>    | Malaysia, Sarawak, Bako National Park, along Lintang Trail                                        | 1.718    | 110.452   | A     |
| S252  | <i>Calapnita saluang</i>       | Thailand, Krabi, Khao Phanom Bencha National Park, trails near headquarters                       | 8.235    | 98.918    | A     |
| GB33  | <i>Calapnita semengoh</i>      | Malaysia, Sarawak, Semengoh NP                                                                    | 1.398    | 110.32    | A     |
| S135  | <i>Calapnita semengoh</i>      | Malaysia, Sarawak, Semengoh NP                                                                    | 1.398    | 110.32    | A     |
| S229  | <i>Calapnita subphyllicola</i> | Philippines, Mindanao, near Santo Domingo, Penolohan                                              | 7.769    | 125.42    | A     |
| S076  | <i>Calapnita vermiformis</i>   | Philippines, Luzon, Mt. Banahaw, forest near Taytay Falls                                         | 14.11    | 121.507   | A     |
| S424  | <i>Calapnita vermiformis?</i>  | Philippines, Negros, Negros Oriental Prov., Twin Lakes National Park                              | 9.366    | 123.181   | A     |
| OG37  | <i>Callobius sp</i>            | -                                                                                                 | -        | -         | na    |
| S344  | <i>Carapoia alagoas</i>        | Brazil, Alagoas, near Murici, degraded forest near road                                           | -9.327   | -35.91    | A     |
| S352  | <i>Carapoia Br15-15</i>        | Brazil, Bahia, Fazenda Morro de Pedra                                                             | -12.528  | -40.604   | B     |
| S455  | <i>Carapoia Br15-18</i>        | Brazil, Bahia, Fazenda Morro de Pedra                                                             | -12.528  | -40.604   | B     |
| S392  | <i>Carapoia Br15-48</i>        | Brazil, Alagoas, Reserva Biológica de Pedra Talhada                                               | -9.238   | -36.448   | A     |
| S354  | <i>Carapoia Br15-62</i>        | Brazil, Alagoas, Reserva Biológica de Pedra Talhada                                               | -9.238   | -36.448   | A     |
| S394  | <i>Carapoia Br15-78</i>        | Brazil, Pernambuco, near Bonito, forest near Cachoeira da Gruta                                   | -8.547   | -35.712   | A     |
| S393  | <i>Carapoia Br15-79</i>        | Brazil, Pernambuco, near Bonito, forest near Cachoeira da Gruta                                   | -8.547   | -35.712   | A     |
| S428  | <i>Carapoia Br16-58</i>        | Brazil, Pará, Floresta Nacional de Tapajós, km 67, 'site 1'                                       | -2.847   | -54.972   | A     |
| S429  | <i>Carapoia Br16-67</i>        | Brazil, Pará, Floresta Nacional de Tapajós, km 67, 'site 1'                                       | -2.847   | -54.972   | A     |
| S425  | <i>Carapoia Br16-73</i>        | Brazil, Pará, Floresta Nacional de Tapajós, km 67, 'site 2'                                       | -2.875   | -54.941   | A     |
| S035  | <i>Carapoia brescoviti</i>     | Brazil, Bahia, Res. Biol. de Una                                                                  | -15.175  | -39.058   | A     |
| GB34  | <i>Carapoia capixaba</i>       | Brazil, Espírito Santo, Res. Biol. de Sooretama, site 1                                           | -19.055  | -40.147   | A     |

| code  | species                          | locality                                                                | latitude | longitude | biome |
|-------|----------------------------------|-------------------------------------------------------------------------|----------|-----------|-------|
| S027  | <i>Carapoia capixaba</i>         | Brazil, Espirito Santo, Res. Biol. de Sooretama, site 1                 | -19.055  | -40.147   | A     |
| S345  | <i>Carapoia carvalhoi</i>        | Brazil, Bahia, near Santa Teresinha, Serra da Jibóia, near hilltop      | -12.856  | -39.477   | A     |
| S040  | <i>Carapoia carybei</i>          | Brazil, Bahia, Mata de São João                                         | -12.467  | -38.233   | A     |
| S346  | <i>Carapoia crasto</i>           | Brazil, Sergipe, near Santa Luzia do Itanh, Mata do Crasto              | -11.378  | -37.418   | A     |
| GB05  | <i>Carapoia dandarae</i>         | Brazil, Bahia, Reserva Particular do Patrimônio Natural Serra Bonita    | -15.388  | -39.563   | A     |
| S033  | <i>Carapoia dandarae</i>         | Brazil, Bahia, Reserva Particular do Patrimônio Natural Serra Bonita    | -15.388  | -39.563   | A     |
| P0209 | <i>Carapoia divisa</i>           | Brazil, Rio de Janeiro, Santa Maria Madalena, forest fragment           | -21.983  | -41.957   | A     |
| S426  | <i>Carapoia fowleri</i>          | Brazil, Amazonas, Manaus, Reserva Ducke                                 | -2.932   | -59.97    | A     |
| P0205 | <i>Carapoia genitalis</i>        | Brazil, São Paulo, Paranapiacaba, Estação Biologica do Alto da Serra    | -23.778  | -46.31    | A     |
| GB35  | <i>Carapoia gracilis</i>         | Brazil, Bahia, Parque Nacional do Pau Brasil, site 2                    | -16.428  | -39.352   | A     |
| S030  | <i>Carapoia gracilis</i>         | Brazil, Bahia, Parque Nacional do Pau Brasil, site 2                    | -16.428  | -39.352   | A     |
| S343  | <i>Carapoia jiboja</i>           | Brazil, Bahia, near Santa Teresinha, Serra da Jibóia                    | -12.845  | -39.489   | A     |
| P0206 | <i>Carapoia macacu</i>           | Brazil, Rio de Janeiro, ~3.5 km NW Parati                               | -23.192  | -44.732   | A     |
| P0207 | <i>Carapoia macacu</i>           | Brazil, Rio de Janeiro, Cachoeiras de Macacu, Res. Ecol. Guapiaçú       | -22.415  | -42.745   | A     |
| S037  | <i>Carapoia marceloi</i>         | Brazil, Bahia, Res. Ecol. da Michelin, 'site 1'                         | -13.822  | -39.198   | A     |
| S026  | <i>Carapoia mirim</i>            | Brazil, Espirito Santo, Res. Biol. de Sooretama, 'site 1'               | -19.055  | -40.147   | A     |
| P0211 | <i>Carapoia nairae</i>           | Brazil, Espirito Santo, Vargem Alta, Fazenda Monte Verde                | -20.465  | -40.995   | A     |
| S427  | <i>Carapoia oacina</i>           | Brazil, Amazonas, forest near Tabatinga                                 | -4.244   | -69.925   | A     |
| BB02  | <i>Carapoia paraguensis</i>      | Venezuela, Bolívar, km 44 from El Dorado                                | 6.417    | -61.642   | A     |
| JA97  | <i>Carapoia paraguensis</i>      | Venezuela, Bolívar, km 44 from El Dorado                                | 6.417    | -61.642   | A     |
| S028  | <i>Carapoia patafina</i>         | Brazil, Espirito Santo, Res. Biol. Córrego do Veado, 'site 1'           | -18.368  | -40.138   | A     |
| S029  | <i>Carapoia pau</i>              | Brazil, Bahia, Parque Nacional do Pau Brasil, 'site 2'                  | -16.428  | -39.352   | A     |
| S031  | <i>Carapoia rheimsae</i>         | Brazil, Bahia, Reserva Particular do Patrimônio Natural Serra Bonita    | -15.388  | -39.563   | A     |
| S288  | <i>Carapoia RJ16</i>             | Brazil, Rio de Janeiro, Macaé, Mata da Atalaia                          | -22.31   | -42.003   | A     |
| S342  | <i>Carapoia septentrionalis</i>  | Brazil, Pernambuco, near São Vicente Ferrer, 'site 1'                   | -7.622   | -35.465   | A     |
| JA102 | <i>Carapoia ubatuba</i>          | Brazil, São Paulo, Ubatuba, Fazenda Angelim                             | -22.615  | -52.298   | A     |
| S036  | <i>Carapoia una</i>              | Brazil, Bahia, Res. Biol. de Una                                        | -15.175  | -39.058   | A     |
| S038  | <i>Carapoia viridis</i>          | Brazil, Bahia, Res. Ecol. da Michelin, 'site 2'                         | -13.842  | -39.242   | A     |
| P0208 | <i>Carapoia voltavelha</i>       | Brazil, Santa Catarina, Itapoá, Reserva Volta Velha                     | -26.097  | -48.652   | A     |
| S034  | <i>Carapoia zumbii</i>           | Brazil, Bahia, Reserva Particular do Patrimônio Natural Serra Bonita    | -15.388  | -39.563   | A     |
| S060  | <i>Chibchea mapuche?</i>         | Chile, Curicó, 30 km E Los Queñes                                       | -35.063  | -70.513   | D     |
| S058  | <i>Chibchea picunche?</i>        | Chile, Coquimbo, 4 km S Los Vilos                                       | -31.936  | -71.516   | L     |
| S430  | <i>Chisosa diluta</i>            | USA, Texas, Big Bend National Park, Hot Springs                         | 29.177   | -103.001  | M     |
| BB03  | <i>Ciboneya antraia</i>          | Cuba, Pinar del Río, Ceja de Francisco                                  | 22.45    | -84       | A     |
| S313  | <i>Ciboneya nuriae</i>           | Cuba, Pinar del Río, Viñales, forest at Las Maravillas de Viñales       | 22.562   | -83.833   | A     |
| S289  | <i>'Coryssocnemis' iviei</i>     | Mexico, Hidalgo, 2.5 km N Zacualtipan, road to Santiago Tian-guiestengo | 20.675   | -98.669   | C     |
| JA100 | <i>Coryssocnemis simla</i>       | Venezuela, Sucre, Cascada el Chorro                                     | 10.392   | -63.633   | A     |
| JA107 | <i>Coryssocnemis simla</i>       | Trinidad, Tunapuna-Piarco, Arima-Blanchisseuse Road                     | 10.71    | -61.29    | A     |
| P0154 | <i>Crossopriza lyoni</i>         | Guinea, Guinée Forestière, Kissidougou                                  | 9.187    | -10.093   | SA    |
| SB026 | <i>Crossopriza lyoni</i>         | India, Maharashtra, Amravati, Melghat Tiger Reserve                     | 21.04    | 77.2      | SA    |
| S499  | <i>Crossopriza Om16</i>          | Oman, Ad Dhahira, Ibri, Al Kittan Cave                                  | 23.298   | 56.511    | M     |
| S500  | <i>Crossopriza Om20</i>          | Oman, Ad Dhahira, near Miskin (between Ibri and Rusdaq)                 | 23.496   | 56.838    | H     |
| S290  | <i>Crossopriza pristina</i>      | Sudan, Kassala, New Halfa                                               | 15.33    | 35.6      | M     |
| OG9   | <i>Deinopsis spinosa</i>         | -                                                                       |          |           | na    |
| OG35  | <i>Diguetia sp</i>               | -                                                                       |          |           | na    |
| OG20  | <i>Dysdera erythrina-fervida</i> | -                                                                       |          |           | na    |
| OG19  | <i>Dysderocrates silvestris</i>  | -                                                                       |          |           | na    |
| OG22  | <i>Erigone dentosa</i>           | -                                                                       |          |           | na    |
| OG1   | <i>Euagrus chisouseus</i>        | -                                                                       |          |           | na    |
| S323  | <i>Gen. Cu12-325</i>             | Cuba, Siboney                                                           |          |           | M     |
| S329  | <i>Gen.n. Br15-159</i>           | Brazil, Rio Grande do Norte, near Baraúna, Caverna Porco do Mato II     | -5.047   | -37.54    | M     |
| S353  | <i>Gen.n. Br15-45</i>            | Brazil, Alagoas, near Murici, Estação Ecológica de Murici               | -9.247   | -35.838   | A     |
| S433  | <i>Gen.n. Br16-178</i>           | Brazil, Acre, Cruzeiro do Sul, forest at Fazenda Colorado, 'site 1'     | -7.525   | -72.65    | A     |
| S431  | <i>Gen.n. Br16-196</i>           | Brazil, Amazonas, forest near Tabatinga                                 | -4.244   | -69.925   | A     |
| S464  | <i>Gen.n. Br16-44</i>            | Brazil, Amapá, forest SW Macapá, 'site 2'                               | -0.051   | -51.123   | G     |
| S432  | <i>Gen.n. Br16-50</i>            | Brazil, Amapá, forest SW Macapá, 'site 3'                               | -0.138   | -51.367   | A/G   |
| S006  | <i>Gen.n. Geneve59</i>           | Curaçao, Jan Kok Lodges                                                 | 12.217   | -69.051   | M     |
| S468  | <i>Gen.n. Ind206</i>             | Indonesia, Halmahera, degraded forest along river near Sofifi           | 0.715    | 127.586   | A     |
| S357  | <i>Gen.n. MACN270</i>            | Argentina, San Luis, Villa de Merlo, Parque Recr. Pasos Malos           | -32.319  | -64.972   | G     |
| S358  | <i>Gen.n. MACN273</i>            | Bolivia, Santa Cruz, Yabaré                                             | -16.442  | -62.173   | B     |
| S501  | <i>Gen.n. Om6</i>                | Oman, Ash Sharqiyah South, between Sur and Al Kamil                     | 22.462   | 59.388    | M     |
| JA83  | <i>Gen.n. Ven01</i>              | Venezuela, Bolívar, Canaima, Salto el Sapo                              | 6.242    | -62.85    | G     |
| S059  | <i>Gertschiola macrostyla</i>    | Argentina, San Juan, Valle Fértil, Chucuma                              | -31.037  | -67.286   | J     |
| S434  | <i>Gertschiola macrostyla</i>    | Argentina, San Luis, Sierra de las Quijadas National Park               | -32.494  | -66.963   | J     |
| S347  | <i>Guaranita yaculica?</i>       | Argentina, Jujuy, Calilegua National Park                               | -23.762  | -64.851   | A     |
| S122  | <i>Hantu kapit</i>               | Malaysia, Sarawak, near Kapit                                           | 1.941    | 112.907   | A     |
| S412  | <i>Hantu kapit</i>               | Malaysia, Sarawak, near Kapit                                           | 1.941    | 112.907   | A     |
| S322  | <i>Hantu niah</i>                | Malaysia, Sarawak, Niah Cave National Park, forest near cave            | 3.814    | 113.771   | A     |
| OG10  | <i>Harpactea hombergi</i>        | -                                                                       |          |           | na    |
| OG36  | <i>Harpactocrates radulifer</i>  | -                                                                       |          |           | na    |
| OG18  | <i>Herennia multipuncta</i>      | -                                                                       |          |           | na    |
| S348  | <i>Holocneminus huangdi</i>      | Indonesia, Sumatra, Ngalau Indah Cave near Payakumbuh                   | -0.255   | 100.603   | A     |

| code  | species                           | locality                                                                                  | latitude | longitude | biome |
|-------|-----------------------------------|-------------------------------------------------------------------------------------------|----------|-----------|-------|
| S486  | <i>Holocneminus Ind73</i>         | Indonesia, Sulawesi, between Bantimurung and Kappang                                      | -5.049   | 119.738   | A     |
| S253  | <i>Holocneminus multiguttatus</i> | Singapore, Upper Selatar Reservoir Park                                                   | 1.4      | 103.807   | A     |
| S254  | <i>Holocneminus multiguttatus</i> | Malaysia, Pulau Pinang, Penang National Park near Teluk Bahang                            | 5.462    | 100.202   | A     |
| S016  | <i>Holocneminus Phi105</i>        | Philippines, Mindanao, Iligan, NPC Nature's Park near Cristina Falls                      | 8.186    | 124.192   | A     |
| S078  | <i>Holocneminus Phi74</i>         | Philippines, Dinagat, Paragua Forest, 'site 1'                                            | 10.222   | 125.553   | A     |
| S068  | <i>Holocneminus Phi9</i>          | Philippines, Negros, Negros Oriental Prov., Twin Lakes National Park                      | 9.366    | 123.181   | A     |
| S435  | <i>Holocnemus caudatus</i>        | Morocco, Souss-Massa-Draa, Imouzzzer, N Agadir                                            | 30.678   | -9.483    | L     |
| P0233 | <i>Holocnemus hispanicus</i>      | Spain, Larrache                                                                           |          |           | L     |
| S436  | <i>Hoplopholcus asiaeminoris</i>  | Turkey, Konya Prov., Hadim District, Su Ç?kt??? Ma?aras?                                  | 36.978   | 32.401    | L     |
| S009  | <i>Hoplopholcus ceconii</i>       | Israel, Haifa Distr., Bét She'arim                                                        | 32.703   | 35.129    | D     |
| S437  | <i>Hoplopholcus Del5</i>          | Turkey, Antalya Prov., Gazipa?a District, Yalan Dünya Ma?aras?                            | 36.221   | 32.402    | L     |
| S057  | <i>Hoplopholcus forskali</i>      | Hungary, Csongrád, Szeged                                                                 | 46.25    | 20.15     | D     |
| S316  | <i>Hoplopholcus labyrinthi</i>    | Greece, Crete, Melidoni Cave                                                              | 35.385   | 24.73     | L     |
| S438  | <i>Hoplopholcus Mar66</i>         | Turkey, Antalya Prov., Alanya District, Dim Ma?aras?                                      | 36.539   | 32.11     | L     |
| S315  | <i>Hoplopholcus minotaurinus</i>  | Greece, Crete, Milatos Cave                                                               | 35.308   | 25.578    | L     |
| S314  | <i>Hoplopholcus minous</i>        | Greece, Crete, Exo Mouliana, along path to Richtis Waterfall                              | 35.182   | 25.988    | L     |
| S439  | <i>Hoplopholcus patrizii</i>      | Turkey, Antalya Prov., Dö?emealt? District, Kocain Ma?aras?                               | 37.233   | 30.712    | L     |
| S440  | <i>Hoplopholcus Tur21</i>         | Turkey, Mersin Prov., Ayd?nc?k District, Aynal?göl (Gilindere) Ma?aras?                   | 36.131   | 33.403    | L     |
| S441  | <i>Hoplopholcus Tur32</i>         | Turkey, Antalya Prov., Finike District, Sulu ?n Ma?aras? (Gök Ma?ara)                     | 36.282   | 30.15     | L     |
| S442  | <i>Hoplopholcus Tur7</i>          | Turkey, Konya Prov., Derebucak District, Körükini Ma?aras?                                | 37.348   | 31.628    | L     |
| OG27  | <i>Hyptiotes gertschi</i>         | -                                                                                         |          |           | na    |
| S443  | <i>Ibotyporanga Br16-149</i>      | Brazil, Rondônia, Floresta Nacional de Jamari, Gran Piedra                                | -9.198   | -63.082   | A     |
| JA123 | <i>Ibotyporanga naideae</i>       | Brazil, São Paulo, Campinas                                                               | -22.9    | -47.07    | A     |
| Ixc29 | <i>Ixchela abernathyi</i>         | Mexico, San Luis Potosí, Km 227 Carretera Federal No. 70 Ciudad San Luis Potosí-Río Verde | 22.088   | -100.65   | C     |
| Ixc51 | <i>Ixchela santibanezi</i>        | Mexico, Chiapas, Municipio San Fernando, Cueva de las Abejas, outside cave                | 16.849   | -93.243   | A     |
| Ixc39 | <i>Ixchela taxco</i>              | Mexico, Guerrero, "Rancho La Soñadora", 6 km W Taxco                                      | 18.561   | -99.636   | C     |
| Ixc56 | <i>Ixchela viquezi</i>            | Honduras, Francisco Morazán, Parque Nacional La Tigra, 10 km NE Tegucigalpa               | 14.212   | -87.095   | A     |
| S328  | <i>Kambiwa neotropica</i>         | Brazil, Rio Grande do Norte, near Felipe Guerra, Lajedo do Arapuá                         | -5.529   | -37.614   | M/N   |
| S318  | <i>Khorata circularis</i>         | Laos, Vientiane, Lom Cave, 4.01 km N Vang Vieng                                           | 18.958   | 102.437   | A     |
| S319  | <i>Khorata dupla</i>              | Laos, Champasak, Tad Fane Resort                                                          | 15.182   | 106.127   | A     |
| P0223 | <i>Khorata khammouan</i>          | Laos, Khammouane, Thakek                                                                  | 17.43    | 104.87    | A     |
| OG24  | <i>Kukulcania hibernalis</i>      | -                                                                                         |          |           | na    |
| S255  | <i>Leptopholcus borneensis</i>    | Thailand, Kanchanaburi, Erawan National Park, forest along stream                         | 14.37    | 99.146    | A     |
| GB36  | <i>Leptopholcus budongo</i>       | Uganda, Masindi Distr., Budongo Forest Reserve                                            | 1.717    | 31.535    | A     |
| P0260 | <i>Leptopholcus budongo</i>       | Uganda, Masindi Distr., Budongo Forest Reserve                                            | 1.717    | 31.535    | A     |
| P0237 | <i>Leptopholcus cf griswoldi</i>  | Madagascar, Toamasina, Station Forestier Analamazaotra, 0.75 km N Andasibe                | -18.93   | 48.412    | A     |
| P0176 | <i>Leptopholcus dschang</i>       | Cameroon, Southwest Region, near Dschang, Attuleh, site 2                                 | 5.465    | 9.942     | A     |
| P0192 | <i>Leptopholcus dschang</i>       | Cameroon, Southwest Region, near Dschang, Attuleh, site 2                                 | 5.465    | 9.942     | A     |
| GB07  | <i>Leptopholcus gabonicus</i>     | Gabon, Ogooué-Ivindo, Monts de Belinga, forest near Mayebout                              | 1.112    | 13.11     | A     |
| P0160 | <i>Leptopholcus gracilis</i>      | Kenya, Coast Prov., Gedi Forest near Gedi ruins                                           | -3.308   | 40.018    | A     |
| P0220 | <i>Leptopholcus gracilis?</i>     | South Africa, KwaZulu Natal, Bonamanzi Reserve                                            | -28.067  | 32.3      | A     |
| P0150 | <i>Leptopholcus guineensis</i>    | Guinea, Moyenne-Guinée, SE Mamou                                                          | 10.293   | -11.942   | A     |
| SB070 | <i>Leptopholcus kandy</i>         | Sri Lanka, Central Prov., Matale distric, Bowatenna Reservoir area                        | 7.66     | 80.688    | A     |
| SB071 | <i>Leptopholcus kandy</i>         | Sri Lanka, Southern Prov., Galle District, Hiyare, Kombala-Kottawa FR, 252m               | 6.06     | 80.32     | A     |
| GB08  | <i>Leptopholcus kintampo</i>      | Ghana, Brong-Ahafo Region, Kintampo Falls                                                 | 8.088    | -1.698    | G     |
| P0235 | <i>Leptopholcus MRAC530</i>       | Congo DR, Equator, Mbangi, old secondary forest                                           | 2.117    | 21.733    | A     |
| P0279 | <i>Leptopholcus podophthalmus</i> | Singapore, Clementi Rd (near Clementi Neighbourhood Park)                                 | 1.326    | 103.775   | A     |
| S349  | <i>Leptopholcus podophthalmus</i> | Malaysia, Pahang, Cameron Highlands, forest along 'trail 9'                               | 4.46     | 101.392   | A     |
| SB068 | <i>Leptopholcus podophthalmus</i> | Sri Lanka, Central Prov., Matale District, Bowatenna Reservoir area                       | 7.66     | 80.688    | A     |
| P0146 | <i>Leptopholcus tipula</i>        | Guinea, Guinée Forestière, Forêt Classée de Zياما                                         | 8.403    | -9.322    | A     |
| P0169 | <i>Leptopholcus tipula</i>        | Cameroon, South Region, between Kribi and Campo, 'site 1'                                 | 2.703    | 9.863     | A     |
| P0236 | <i>Leptopholcus tipula</i>        | Congo DR, Orientale, Monzé (Engengele) sec. forest                                        | 2.033    | 22.733    | A     |
| P0261 | <i>Leptopholcus tipula</i>        | Uganda, Bushenyi Distr., Kyambura River Gorge                                             | -0.178   | 30.097    | A     |
| OG11  | <i>Leucauge venusta_B</i>         | -                                                                                         |          |           | na    |
| OG30  | <i>Linyphia triangularis_A</i>    | -                                                                                         |          |           | na    |
| S351  | <i>Litoporus Br15-107</i>         | Brazil, Paraíba, near Queimadas, rocky outcrop near road                                  | -7.351   | -35.902   | M     |
| S444  | <i>Litoporus Br16-153</i>         | Brazil, Acre, Rio Branco, Fazenda Experimental Catuaba                                    | -10.08   | -67.625   | A     |
| S445  | <i>Litoporus Br16-62</i>          | Brazil, Pará, Floresta Nacional de Tapajós, km 67, 'site 1'                               | -2.847   | -54.972   | A     |
| S446  | <i>Litoporus dimona</i>           | Brazil, Amazonas, Manaus, Reserva Ducke                                                   | -2.932   | -59.97    | A     |
| P0212 | <i>Litoporus iguassuensis</i>     | Brazil, Espírito Santo, Vargem Alta, Fazenda Monte Verde                                  | -20.465  | -40.995   | A     |

| code  | species                            | locality                                                                 | latitude | longitude | biome |
|-------|------------------------------------|--------------------------------------------------------------------------|----------|-----------|-------|
| P0213 | <i>Litoporus iguassuensis</i>      | Brazil, Rio de Janeiro, Santa Maria Madalena, forest fragment            | -21.983  | -41.957   | A     |
| S447  | <i>Litoporus manu</i>              | Brazil, Amazonas, forest near Humaitá, 'site 3'                          | -7.512   | -63.393   | A     |
| OG17  | <i>Loxosceles laeta</i>            | -                                                                        |          |           | na    |
| S448  | <i>Mecolaesthus arima</i>          | Trinidad, Couva-Tabaquite-Talparo, Arena Forest                          | 10.56    | -61.23    | A     |
| JA89  | <i>Mecolaesthus longissimus</i>    | Venezuela, Aragua, Colonia Tovar                                         | 10.417   | -67.3     | A     |
| S294  | <i>Mecolaesthus nigrifrons?</i>    | Martinique, Saint Pierre, Mome Rose Trail                                | 14.673   | -61.123   | A     |
| S449  | <i>Mecolaesthus taino?</i>         | Dominica, St. Paul Parish, Middleham Falls Trail                         | 15.341   | -61.334   | A     |
| S295  | <i>Mecolaesthus Ven02/80-12</i>    | Venezuela, Lara, Parque Nacional Yacambú                                 | 9.708    | -69.583   | A     |
| S450  | <i>Mecolaesthus yawaperi</i>       | Brazil, Amazonas, Manaus, Reserva Ducke                                  | -2.932   | -59.97    | A     |
| BB09a | <i>Mesabolivar aurantiacus</i>     | Trinidad, Couva-Tabaquite-Talparo, Arena Forest                          | 10.56    | -61.23    | A     |
| S388  | <i>Mesabolivar azureus</i>         | Brazil, Rio de Janeiro, Cachoeiras de Macacu, Res. Ecol. Guapiaçú        | -22.415  | -42.745   | A     |
| GB09  | <i>Mesabolivar bonita</i>          | Brazil, Bahia, Reserva Particular do Patrimônio Natural Serra Bonita     | -15.388  | -39.563   | A     |
| S487  | <i>Mesabolivar Br11-10</i>         | Brazil, Espírito Santo, Res. Biol. de Sooretama, 'site 1'                | -19.055  | -40.147   | A     |
| S350  | <i>Mesabolivar Br14-25</i>         | Brazil, Parana, Iratí Forest Reserve                                     | -25.362  | -50.584   | A     |
| S390  | <i>Mesabolivar Br14-26</i>         | Brazil, Santa Catarina, Três Barras National Forest                      | -26.242  | -50.301   | A     |
| S391  | <i>Mesabolivar Br14-30</i>         | Brazil, Santa Catarina, Serra do Itajaí National Park                    | -27.058  | -49.084   | A     |
| S389  | <i>Mesabolivar Br14-4</i>          | Brazil, Parana, Saint-Hilaire/Lange National Park, above Fazenda Niteroi | -25.657  | -48.601   | A     |
| S305  | <i>Mesabolivar Br14-55</i>         | Brazil, Santa Catarina, Serra Geral National Park, Churriado Canyon      | -29.137  | -49.953   | A     |
| S451  | <i>Mesabolivar Br16-138</i>        | Brazil, Rondônia, Floresta Nacional de Jamari, 'sites 2 & 3'             | -9.24    | -62.925   | A     |
| S452  | <i>Mesabolivar Br16-32</i>         | Brazil, Pará, Marabá, forest near road, 'site 2'                         | -5.36    | -49.058   | A     |
| S453  | <i>Mesabolivar Br16-60</i>         | Brazil, Pará, Floresta Nacional de Tapajós, km 83                        | -3.049   | -54.928   | A     |
| BB10  | <i>Mesabolivar brasiliensis</i>    | Brazil, São Paulo, São Paulo, Parque Estadual de Cantareira              | -23.4    | -46.58    | A     |
| S456  | <i>Mesabolivar cambridgei</i>      | Brazil, Pará, Belém, Parque Estadual do Utinga, 'site 1'                 | -1.424   | -48.429   | A     |
| JA50  | <i>Mesabolivar camussi</i>         | Brazil, São Paulo, São Paulo, Parque Estadual de Cantareira              | -23.4    | -46.58    | A     |
| JA10  | <i>Mesabolivar cavicelatus</i>     | Brazil, São Paulo, Ubatuba, Fazenda Angelim                              | -22.615  | -52.298   | A     |
| S395  | <i>Mesabolivar charrua</i>         | Brazil, Rio Grande do Sul, São Francisco de Paula National Forest        | -29.43   | -50.392   | G     |
| JA52  | <i>Mesabolivar cyaneomaculatus</i> | Brazil, São Paulo, Paranapiacaba, Estação Biologica do Alto da Serra     | -23.778  | -46.31    | A     |
| BB11  | <i>Mesabolivar cyaneotaeniatus</i> | Brazil, Rio de Janeiro, Itatiaia                                         | -22.496  | -44.561   | A     |
| JA57  | <i>Mesabolivar cyaneotaeniatus</i> | Brazil, São Paulo, São Paulo, Jardim Zoologico                           | -23.651  | -46.621   | A     |
| JA34  | <i>Mesabolivar eberhardi</i>       | Venezuela, Dist. Federal, Parque Nacional El Ávila                       | 10.517   | -66.85    | A     |
| JA93  | <i>Mesabolivar eberhardi</i>       | Venezuela, Bolívar, Canaima, near Salto Ara                              | 6.242    | -62.85    | A     |
| JA53  | <i>Mesabolivar gabettiae</i>       | Brazil, São Paulo, Paranapiacaba, Estação Biologica do Alto da Serra     | -23.778  | -46.31    | A     |
| S410  | <i>Mesabolivar goitaca</i>         | Brazil, Rio de Janeiro, ~4 km NW Penedo                                  | -22.408  | -44.553   | A     |
| S454  | <i>Mesabolivar huambisa?</i>       | Brazil, Pará, Belém, Parque Estadual do Utinga, 'site 1'                 | -1.424   | -48.429   | A     |
| S396  | <i>Mesabolivar huberi</i>          | Brazil, Santa Catarina, Itajaí National Park, 3a Vargem Trail            | -27.065  | -49.098   | A     |
| P0215 | <i>Mesabolivar itapoa</i>          | Brazil, Santa Catarina, Itapoá, Reserva Volta Velha                      | -26.097  | -48.652   | A     |
| S387  | <i>Mesabolivar kathrinae</i>       | Brazil, Alagoas, near Murici, Estação Ecológica de Murici                | -9.247   | -35.838   | A     |
| JA41  | <i>Mesabolivar luteus</i>          | Brazil, Minas Gerais, Catas Altas, Serra do Caraca                       | -20.08   | -43.42    | A     |
| JA19  | <i>Mesabolivar mairiyara</i>       | Brazil, São Paulo, São Paulo, Jardim Zoologico                           | -23.651  | -46.621   | A/G   |
| GB10  | <i>Mesabolivar pau</i>             | Brazil, Bahia, Parque Nacional do Pau Brasil, 'site 2'                   | -16.428  | -39.352   | A     |
| GB11  | <i>Mesabolivar sai</i>             | Brazil, Rio de Janeiro, Res. Ecol. Rio das Pedras                        | -22.992  | -44.107   | A     |
| S397  | <i>Mesabolivar spinulosus</i>      | Brazil, Rio Grande do Norte, Caatinga near João Câmara                   | -5.572   | -35.921   | M     |
| JA29  | <i>Mesabolivar tamoió</i>          | Brazil, São Paulo, Ubatuba, Fazenda Angelim                              | -22.615  | -52.298   | A     |
| JA54  | <i>Mesabolivar togatus</i>         | Brazil, São Paulo, São Paulo, Jardim Zoologico                           | -23.651  | -46.621   | A     |
| P0217 | <i>Mesabolivar unicornis</i>       | Brazil, São Paulo, Paranapiacaba, Estação Biologica do Alto da Serra     | -23.778  | -46.31    | A     |
| BB07  | <i>Mesabolivar yuruani</i>         | Venezuela, Bolívar, km 109 from El Dorado                                | 6.017    | -61.392   | H     |
| JA101 | <i>Mesabolivar yuruani</i>         | Venezuela, Bolívar, km 109 from El Dorado                                | 6.017    | -61.392   | H     |
| S398  | <i>Metagonia argentinensis</i>     | Brazil, Rio Grande do Sul, Passo Fundo National Forest                   | -28.289  | -52.187   | A     |
| JA78  | <i>Metagonia belize</i>            | Belize, Stann Creek, Cockcomb Basin Wildlife Refuge                      | 16.833   | -88.5     | A     |
| S457  | <i>Metagonia beni</i>              | Brazil, Acre, Cruzeiro do Sul, forest near airport                       | -7.596   | -72.767   | A     |
| P0198 | <i>Metagonia bifida?</i>           | Brazil, Rio de Janeiro, ~4 km NW Penedo                                  | -22.408  | -44.553   | A     |
| JA12  | <i>Metagonia Br03/80-25</i>        | Brazil, São Paulo, São Paulo, Parque Estadual de Cantareira              | -23.4    | -46.58    | A     |
| BB13  | <i>Metagonia Br03/80-25</i>        | Brazil, São Paulo, São Paulo, Parque Estadual de Cantareira              | -23.4    | -46.58    | A     |
| P0199 | <i>Metagonia Br07/80-1</i>         | Brazil, Rio de Janeiro, ~4 km NW Penedo                                  | -22.408  | -44.553   | A     |
| P0277 | <i>Metagonia Br09-2</i>            | Brazil, Rio de Janeiro, Cachoeiras de Macacu, Res. Ecol. Guapiaçú        | -22.415  | -42.745   | A     |
| P0197 | <i>Metagonia Br09-4</i>            | Brazil, Rio de Janeiro, Cachoeiras de Macacu, Res. Ecol. Guapiaçú        | -22.415  | -42.745   | A     |
| JA27  | <i>Metagonia Br09-52</i>           | Brazil, São Paulo, Ubatuba, Fazenda Angelim                              | -22.615  | -52.298   | A     |
| JA11  | <i>Metagonia Br09-55</i>           | Brazil, São Paulo, Ubatuba, Fazenda Angelim                              | -22.615  | -52.298   | N     |
| S488  | <i>Metagonia Br10-38</i>           | Brazil, Espírito Santo, Vargem Alta, Fazenda Monte Verde                 | -20.465  | -40.995   | A     |
| S489  | <i>Metagonia Br11-11</i>           | Brazil, Bahia, Parque Nacional do Pau Brasil, 'site 2'                   | -16.428  | -39.352   | A     |
| S458  | <i>Metagonia Br15-101</i>          | Brazil, Pernambuco, near São Vicente Ferrer, 'site 1'                    | -7.622   | -35.465   | M     |
| S459  | <i>Metagonia Br16-125</i>          | Brazil, Rondônia, Floresta Nacional de Jamari, 'site 1'                  | -9.193   | -63.107   | A     |
| S460  | <i>Metagonia Br16-180</i>          | Brazil, Amazonas, forest near Tabatinga                                  | -4.244   | -69.925   | A     |
| S490  | <i>Metagonia Br16-205</i>          | Brazil, Amazonas, forest near Tabatinga                                  | -4.244   | -69.925   | A     |
| S461  | <i>Metagonia Br16-216</i>          | Brazil, Amazonas, Manaus, Reserva Ducke                                  | -2.932   | -59.97    | A     |
| JA117 | <i>Metagonia delicata</i>          | Belize, Stann Creek, Cockcomb Basin Wildlife Refuge                      | 16.833   | -88.5     | A     |
| P0216 | <i>Metagonia furcata</i>           | Brazil, Espírito Santo, Mimoso do Sul, Finca Tacutinga                   | -21.023  | -41.39    | A     |



| code  | species                          | locality                                                                                | latitude | longitude | biome |
|-------|----------------------------------|-----------------------------------------------------------------------------------------|----------|-----------|-------|
| BB14  | <i>Metagonia G062</i>            | Brazil, São Paulo, Iporanga, PETAR                                                      | -24.552  | -48.68    | A     |
| S462  | <i>Metagonia globulosa</i>       | Brazil, Pará, Marabá, forest near road, 'site 1'                                        | -5.414   | -49.074   | A     |
| S399  | <i>Metagonia jamaica</i>         | Jamaica, Clarendon Parish, Jackson Bay, 3rd Cave                                        | 17.734   | -77.222   | B     |
| JA23  | <i>Metagonia mariquitarensis</i> | Venezuela, Sucre, Mariguitar                                                            | 10.442   | -63.908   | G     |
| JA15  | <i>Metagonia paranapiacaba</i>   | Brazil, São Paulo, Paranapiacaba, Estação Biologica do Alto da Serra                    | -23.778  | -46.31    | A     |
| S400  | <i>Metagonia potiguar</i>        | Brazil, Rio Grande do Norte, near Felipe Guerra, Lajedo do Arapuá, Caverna do Sabonete  | -5.527   | -37.624   | M     |
| S401  | <i>Metagonia rica?</i>           | Costa Rica, Heredia, La Selva Biol. Stn, 2014                                           | 10.423   | -84.022   | A     |
| S039  | <i>Metagonia taruma</i>          | Brazil, Bahia, Mata de São João                                                         | -12.467  | -38.233   | A     |
| S463  | <i>Metagonia USA2</i>            | USA, Texas, Big Bend National Park, Cat Tail Fall                                       | 29.273   | -103.336  | M     |
| JA85  | <i>Metagonia Ven02</i>           | Venezuela, Bolívar, Canaima, village forest                                             | 6.242    | -62.85    | G     |
| JA8   | <i>Metagonia Ven54</i>           | Venezuela, Bolívar, km 109 from El Dorado                                               | 6.017    | -61.392   | A     |
| S355  | <i>Micromerys baiteta</i>        | Indonesia, West Papua, Manokwari, Gunung Meja                                           | -0.86    | 134.084   | A     |
| S296  | <i>Micromerys raveni</i>         | Australia, New South Wales, Bunjalung National Park, Woody Head                         | -29.368  | 153.37    | D     |
| S297  | <i>Micromerys yidin</i>          | Australia, Queensland, Kings Plains, Cooktown                                           | -15.485  | 145.256   | A     |
| GB37  | <i>Micropholcus baoruco</i>      | Dom. Rep., Barahona, near Polo                                                          | 18.113   | -71.27    | B     |
| P0166 | <i>Micropholcus baoruco</i>      | Dom. Rep., Barahona, near Polo                                                          | 18.113   | -71.27    | B     |
| Mic02 | <i>Micropholcus dalei</i>        | Puerto Rico, Rio Grande, El Yunque, Big Trees Trail                                     | 18.309   | -65.775   | A     |
| Mic16 | <i>Micropholcus delicatulus</i>  | Cuba, Santiago de Cuba, Estación Biológica La Platica, forest near brook                | 20.009   | -76.894   | A     |
| P0193 | <i>Micropholcus fauroti</i>      | Cameroon, Centre Region, Yaoundé, hotel                                                 | 3.883    | 11.523    | SA    |
| P0165 | <i>Micropholcus hispaniola</i>   | Dom. Rep., La Vega, near La Ciénaga, along river                                        | 19.05    | -70.883   | A     |
| S228  | <i>Micropholcus Phi114</i>       | Philippines, Mindanao, Central Mindanao Univ., Faculty Hill                             | 7.853    | 125.049   | A     |
| GB38  | <i>Micropholcus piaui</i>        | Brazil, Piauí, Castelo do Piauí, Parque Municipal da Pedra de Castelo                   | -5.202   | -41.688   | na    |
| Mic10 | <i>Micropholcus piaui</i>        | Brazil, Piauí, Castelo do Piauí, Parque Municipal da Pedra de Castelo                   | -5.202   | -41.688   | na    |
| P0167 | <i>Micropholcus toma?</i>        | Haiti, Dept Sud, near Le Prete                                                          | 18.265   | -73.945   | A     |
| GB39  | <i>Micropholcus ubajara</i>      | Brazil, Ceará, Parque Nacional de Ubajara, Gruta de Morcego Branco                      | -3.833   | -40.9     | A     |
| Mic11 | <i>Micropholcus ubajara</i>      | Brazil, Ceará, Parque Nacional de Ubajara, Gruta de Morcego Branco                      | -3.833   | -40.9     | A     |
| NF69  | <i>Modisimus berac</i>           | Haiti, Dept Sud-Est, La Visite National Park, 'Berac'                                   | 18.328   | -72.295   | C     |
| S356  | <i>Modisimus cavaticus</i>       | Puerto Rico, Aguas Buenas, Cuevas Aguas Buenas                                          | 18.232   | -66.109   | A     |
| NF13  | <i>Modisimus cienaga</i>         | Dom. Rep., La Vega, near La Ciénaga, along river                                        | 19.05    | -70.883   | C     |
| IA03  | <i>Modisimus Cu12-11</i>         | Cuba, Pinar del Río, forest at km 14 from Pinar del Rio to Viñales                      | 22.535   | -83.7     | C     |
| S106  | <i>Modisimus Cu12-11</i>         | Cuba, Pinar del Río, forest at km 14 from Pinar del Rio to Viñales                      | 22.535   | -83.7     | C     |
| IA04  | <i>Modisimus Cu12-136</i>        | Cuba, Santiago de Cuba, Estación Biológica La Platica, pine forest along mountain crest | 20.011   | -76.884   | A     |
| NF3   | <i>Modisimus cuadro</i>          | Dom. Rep., San Cristóbal, near La Toma                                                  | 18.458   | -70.12    | A     |
| IA01  | <i>Modisimus culicinus</i>       | Cuba, Camagüey, Sierra de Cubitas, Estación Limones-Tuabaquey                           | 21.591   | -77.788   | SA    |
| NF43  | <i>Modisimus culicinus</i>       | Dom. Rep., San Pedro de Macorís, Juan Dolio                                             | 18.425   | -69.427   | SA    |
| IA05  | <i>Modisimus elongatus</i>       | Cuba, Pinar del Río, Viñales, forest at base of mogote, 'site 1'                        | 22.622   | -83.737   | A     |
| NF101 | <i>Modisimus enriqueillo</i>     | Dom. Rep., Barahona, NW Paraiso                                                         | 18.04    | -71.193   | B     |
| NF80  | <i>Modisimus epepye</i>          | Haiti, Dept Sud-Est, near Seguin                                                        | 18.303   | -72.292   | C     |
| NF66  | <i>Modisimus fuscus</i>          | Haiti, Dept Sud-Est, La Visite National Park, Case Dent                                 | 18.337   | -72.273   | A     |
| P0228 | <i>Modisimus G106</i>            | Panama, Chiriquí, Parque Nacional de la Amistad                                         | 8.892    | -82.618   | A     |
| NF9   | <i>Modisimus kiskeya</i>         | Dom. Rep., Monseñor Nouel, near Jima                                                    | 19.023   | -70.48    | A     |
| NF87  | <i>Modisimus leprete</i>         | Haiti, Dept Sud, near Le Prete                                                          | 18.265   | -73.945   | A     |
| IA02  | <i>Modisimus macaya</i>          | Haiti, Dept Sud, Macaya Biosphere Reserve                                               | 18.34    | -74.015   | A     |
| NF37  | <i>Modisimus makandal</i>        | Dom. Rep., Santiago Rodríguez, near Cana                                                | 19.497   | -71.282   | A     |
| NF89  | <i>Modisimus mango</i>           | Haiti, Dept Sud, near Le Prete                                                          | 18.265   | -73.945   | A     |
| NF24  | <i>Modisimus miri</i>            | Dom. Rep., Duarte, Reserva Científica Loma Quita Espuela                                | 19.358   | -70.15    | A/C   |
| NF64  | <i>Modisimus palvet</i>          | Haiti, Dept Sud, Macaya Biosphere Reserve                                               | 18.34    | -74.015   | A     |
| NF53  | <i>Modisimus paraiso</i>         | Dom. Rep., Barahona, NW Paraiso                                                         | 18.04    | -71.193   | B     |
| S113  | <i>Modisimus pavidus</i>         | Cuba, Santiago de Cuba, Estación Biológica La Platica, forest along mountain crest      | 20.01    | -76.883   | A     |
| NF71  | <i>Modisimus roumaini</i>        | Haiti, Dept Sud-Est, between Léogâne and Jacmel                                         | 18.357   | -72.583   | A     |
| NF81  | <i>Modisimus seguin</i>          | Haiti, Dept Sud-Est, near Seguin                                                        | 18.303   | -72.292   | C     |
| S231  | <i>Modisimus signatus</i>        | Puerto Rico, Rio Grande, El Yunque, El Verde                                            | 18.322   | -65.82    | A     |
| NF68  | <i>Modisimus tiburon</i>         | Haiti, Dept Sud-Est, La Visite National Park, 'Berac'                                   | 18.328   | -72.295   | C     |
| NF1   | <i>Modisimus toma</i>            | Dom. Rep., San Cristóbal, near La Toma                                                  | 18.458   | -70.12    | A     |
| NF41  | <i>Modisimus vittatus</i>        | Dom. Rep., Barahona, near Cabral                                                        | 18.243   | -71.197   | B     |
| OG8   | <i>Nephila clavipes_A</i>        | -                                                                                       | -        | -         | na    |
| S061  | <i>Nerudia Mich20</i>            | Argentina, San Juan, Valle Fértil, Parque Natural Valle Fértil                          | -30.638  | -67.489   | G     |
| BB16  | <i>Ninetis subtilissima</i>      | Yemen, Ja'ar                                                                            | 13.223   | 45.305    | M     |
| P0234 | <i>Nita elsaff</i>               | Egypt, Cairo                                                                            | 30       | 31.25     | M     |
| P0144 | <i>Nyikoa limbe</i>              | Guinea, Guinée Forestière, Forêt Classée de Diéké                                       | 7.533    | -8.832    | A     |
| P0179 | <i>Nyikoa limbe</i>              | Cameroon, South Region, near Kribi                                                      | 2.9      | 9.907     | A     |
| OG2   | <i>Oecobius sp</i>               | -                                                                                       | -        | -         | na    |
| S320  | <i>Otavaloa cf angotero</i>      | Ecuador, Napo, Napo-Galeras National Park, betw. Tena and Loreto                        | -0.733   | -77.591   | A     |
| S465  | <i>Otavaloa lisei</i>            | Brazil, Amazonas, forest near Tabatinga                                                 | -4.244   | -69.925   | A     |
| S021  | <i>Otavaloa piro?</i>            | Bolivia, La Paz, Rurrenabaque, Parque Nacional Madidi & surroundings                    | -14.467  | -67.567   | A     |
| S359  | <i>Panjange alba</i>             | Indonesia, Sulawesi, Tinoor Fall near Tomohon                                           | 1.382    | 124.836   | A     |
| S466  | <i>Panjange camiguin</i>         | Philippines, Camiguin, Katibawasan Falls                                                | 9.215    | 124.72    | A     |
| S066  | <i>Panjange casaroro</i>         | Philippines, Negros, Negros Oriental Prov., Casaroro Falls                              | 9.281    | 123.208   | A     |

| code  | species                                           | locality                                                                          | latitude | longitude | biome |
|-------|---------------------------------------------------|-----------------------------------------------------------------------------------|----------|-----------|-------|
| S360  | <i>Panjange cavicola</i>                          | Indonesia, Sulawesi, Bantimurung, at rocks along river                            | -5.015   | 119.686   | A     |
| S218  | <i>Panjange dinagat</i>                           | Philippines, Dinagat, Paragua Forest, 'site 1'                                    | 10.222   | 125.553   | A     |
| GB40  | <i>Panjange iban</i>                              | Malaysia, Sarawak, Semengoh NP                                                    | 1.398    | 110.32    | A     |
| S169  | <i>Panjange iban</i>                              | Malaysia, Sarawak, Semengoh NP                                                    | 1.398    | 110.32    | A     |
| S361  | <i>Panjange Ind103</i>                            | Indonesia, West Papua, Manokwari, Gunung Meja                                     | -0.86    | 134.084   | A     |
| S362  | <i>Panjange Ind109</i>                            | Indonesia, Halmahera, degraded forest along river near Sofifi                     | 0.715    | 127.586   | A     |
| S173  | <i>Panjange kapit</i>                             | Malaysia, Sarawak, near Kapit                                                     | 1.941    | 112.907   | A     |
| GB41  | <i>Panjange kubah</i>                             | Malaysia, Sarawak, Kubah NP                                                       | 1.601    | 110.184   | A     |
| S171  | <i>Panjange kubah</i>                             | Malaysia, Sarawak, Kubah NP                                                       | 1.601    | 110.184   | A     |
| S010  | <i>Panjange lanthana</i>                          | Philippines, Luzon, Mt. Isarog, W slope                                           | 13.664   | 123.34    | A     |
| S224  | <i>Panjange malagos</i>                           | Philippines, Mindanao, Malagos Watershed                                          | 7.184    | 125.415   | A     |
| S222  | <i>Panjange marilog</i>                           | Philippines, Mindanao, Marilog Distr., Baganihan                                  | 7.469    | 125.25    | A     |
| S172  | <i>Panjange niah?</i>                             | Malaysia, Sarawak, Niah Cave National Park                                        | 3.818    | 113.768   | A     |
| S174  | <i>Panjange pueh</i>                              | Malaysia, Sarawak, Pueh foothills                                                 | 1.799    | 109.713   | A     |
| GB42  | <i>Panjange seowi</i>                             | Malaysia, Sarawak, Mt. Penrissen                                                  | 1.126    | 110.217   | A     |
| S170  | <i>Panjange seowi</i>                             | Malaysia, Sarawak, Mt. Penrissen                                                  | 1.126    | 110.217   | A     |
| S011  | <i>Papiamenta MRAC639</i>                         | Curaçao, near San Juan, Manzalina beach                                           | 12.245   | -69.105   | M     |
| P0245 | <i>Paramicromerys<br/>betsileo?</i>               | Madagascar, Fianarantsoa, Ranomafana National Park, Vatoharana, 4 km S Ranomafana | -21.288  | 47.427    | A     |
| P0244 | <i>Paramicromerys<br/>CAS11</i>                   | Madagascar, Toamasina, Station Forestier Analamazaotra, 0.75 km N Andasibe        | -18.93   | 48.412    | A     |
| S363  | <i>Paramicromerys<br/>CAS17</i>                   | Madagascar, Fianarantsoa, Forêt d'Antsirakambiaty                                 | -20.594  | 46.564    | A     |
| P0238 | <i>Paramicromerys CAS3</i>                        | Madagascar, Fianarantsoa, Andringitra National Park, 34 km S Ambalavao            | -22.147  | 46.952    | A     |
| P0221 | <i>Paramicromerys G046</i>                        | Comoros, Anjouan, Domoni, road to Tatinga bridge                                  | -12.182  | 44.512    | A     |
| S383  | <i>Paramicromerys?<br/>CAS13</i>                  | Madagascar, Toliara, Forêt Classée Tsitongambarika                                | -24.987  | 46.927    | A     |
| S467  | <i>Paramicromerys?<br/>CAS4</i>                   | Madagascar, Fianarantsoa, Andringitra National Park, 34 km S Ambalavao            | -22.157  | 46.952    | A     |
| P0151 | <i>Pehrforsskalia conopyga</i>                    | Guinea, Moyenne-Guinée, near Sèbori                                               | 10.777   | -12.29    | A     |
| P0168 | <i>Pehrforsskalia conopyga</i>                    | Cameroon, Northwest Region, near Bamenda                                          | 6.008    | 10.302    | A     |
| JA45  | <i>Pholcophora americana</i>                      | USA, California, Mono County, Inyo Nat. Forest                                    | 37.8     | -118.38   | E     |
| JA46  | <i>Pholcophora americana</i>                      | USA, Montana, Missoula Co., Lolo Forest                                           | 47.072   | -113.384  | E     |
| S298  | <i>Pholcophora? Car544</i>                        | Puerto Rico, Isla Monito                                                          | 18.16    | -67.95    | B     |
| S256  | <i>'Pholcus gracillimus'<br/>sensu Huber 2011</i> | Malaysia, Pahang, Cameron Highlands, near Tanah Rata, forest along 'trail 9'      | 4.462    | 101.39    | A     |
| S257  | <i>'Pholcus kohi' sensu<br/>Huber 2011</i>        | Singapore, MacRitchie Reservoir Park                                              | 1.355    | 103.813   | A     |
| S321  | <i>Pholcus agadir</i>                             | Morocco, Souss-Massa-Draa, Agadir                                                 | 30.43    | -9.619    | L     |
| S178  | <i>Pholcus andulau</i>                            | Malaysia, Sarawak, Gunung Mulu NP                                                 | 4.037    | 114.823   | A     |
| S469  | <i>Pholcus andulau</i>                            | Malaysia, Sarawak, Gunung Mulu NP                                                 | 4.037    | 114.823   | A     |
| S071  | <i>Pholcus arayata</i>                            | Philippines, Luzon, near Olangapo, along river near Pamulaklak Forest Trail       | 14.798   | 121.338   | A     |
| P0281 | <i>Pholcus atrigularis</i>                        | Singapore, Bukit Timah Nature Reserve                                             | 1.343    | 103.775   | A     |
| P0177 | <i>Pholcus attuleh</i>                            | Cameroon, Southwest Region, near Dschang, Attuleh, 'site 2'                       | 5.465    | 9.942     | A     |
| S070  | <i>Pholcus baguio</i>                             | Philippines, Luzon, near Baguio, Mt. Kabuyao, N slope                             | 16.374   | 120.557   | C     |
| P0196 | <i>Pholcus baka</i>                               | Cameroon, South Region, between Kribi and Campo, 'site 1'                         | 2.703    | 9.863     | A     |
| GB43  | <i>Pholcus bamboutos</i>                          | Cameroon, West Region, near Mbouda, Bamboutos                                     | 5.622    | 10.112    | A     |
| P0181 | <i>Pholcus bamboutos</i>                          | Cameroon, West Region, near Mbouda, Bamboutos                                     | 5.622    | 10.112    | A     |
| P0195 | <i>Pholcus bamboutos</i>                          | Cameroon, Northwest Region, near Lake Oku                                         | 6.187    | 10.465    | A     |
| S470  | <i>Pholcus bario</i>                              | Malaysia, Sarawak, Bario, forest along river W of town                            | 3.736    | 115.44    | A     |
| S366  | <i>Pholcus barisan</i>                            | Indonesia, Sumatra, Bukit Barisan                                                 | -5.528   | 104.424   | A     |
| P0250 | <i>Pholcus beijingensis</i>                       | China, Beijing, Fangshan, Xiayunling Town, Sihe Village, Bianfu Cave              | 39.73    | 115.75    | D     |
| S064  | <i>Pholcus bicornutus</i>                         | Philippines, Luzon, Rizal Prov., near Antipolo, Mystical Cave                     | 14.606   | 121.209   | A     |
| S012  | <i>Pholcus bikilai</i>                            | Ethiopia, Southern Nations, Nationalities, and Peoples' Region..., Wondo Genet    | 7.076    | 38.659    | A/J   |
| P0147 | <i>Pholcus bourgini</i>                           | Guinea, Guinée Forestière, Forêt Classée de Zياما                                 | 8.403    | -9.322    | A     |
| S266  | <i>Pholcus buatong</i>                            | Thailand, Krabi, ~10 km N Krabi town, Tham Buatong                                | 8.181    | 98.884    | A     |
| S271  | <i>Pholcus bukittimah</i>                         | Singapore, Dairy Farm Nature Park                                                 | 1.36     | 103.778   | A     |
| S364  | <i>Pholcus camba</i>                              | Indonesia, Sulawesi, Bantimurung, at rocks along river                            | -5.015   | 119.686   | A     |
| P0247 | <i>Pholcus cf jaegeri</i>                         | Laos, Khammouane, Nam Kading National Protected Area                              | 18.18    | 104.475   | A     |
| P0162 | <i>Pholcus chappuisi</i>                          | Kenya, Central Prov., Mt. Kenya, Mau Mau Cave                                     | -0.217   | 37.137    | A     |
| P0201 | <i>Pholcus chappuisi</i>                          | Kenya, Rift Valley, Mt. Elgon National Park, Kitum Cave                           | 1.03     | 34.757    | A     |
| P0148 | <i>Pholcus chattoni</i>                           | Guinea, Guinée Forestière, Mount Nimba                                            | 7.692    | -8.408    | A     |
| S101  | <i>Pholcus chengpoi</i>                           | Taiwan, Pingtung, near Chouqia                                                    | 22.241   | 120.855   | A     |
| S482  | <i>Pholcus cibodas</i>                            | Indonesia, Java, Cidahu, Javana Spa                                               | -6.737   | 106.714   | A     |
| S324  | <i>Pholcus creticus</i>                           | Greece, Crete, Cave near Kritsa                                                   | 35.16    | 25.618    | L     |
| P0182 | <i>Pholcus crypticolens</i>                       | Japan, Hiroshima Pref., Hiroshima-shi, Asakita-ku, Fukawa                         | 34.48    | 132.53    | D     |
| P0222 | <i>Pholcus dade</i>                               | USA, Georgia, Dade Co., Sitton's Cave                                             | 34.85    | -85.467   | D     |
| P0172 | <i>Pholcus debilis</i>                            | Cameroon, Southwest Region, Mt. Koupe above Nyasoso                               | 4.827    | 9.685     | A     |
| P0225 | <i>Pholcus dentatus</i>                           | Portugal, Madeira, Ponta do Sol, Tunel do Lugar de Baixo                          | 32.681   | -17.098   | D     |
| S258  | <i>Pholcus diopsis</i>                            | Thailand, Yala, Wat Kuhapimuk, Tham Meud                                          | 6.528    | 101.225   | A     |
| GB13  | <i>Pholcus domingo</i>                            | Philippines, Mindanao, Santo Domingo                                              | 7.782    | 125.397   | A     |
| S013  | <i>Pholcus domingo</i>                            | Philippines, Mindanao, Santo Domingo                                              | 7.782    | 125.397   | A     |

| code  | species                                | locality                                                                                           | latitude | longitude | biome |
|-------|----------------------------------------|----------------------------------------------------------------------------------------------------|----------|-----------|-------|
| P0149 | <i>Pholcus doucki</i>                  | Guinea, Moyenne-Guinée, near Doucki, canyon                                                        | 10.993   | -12.588   | A     |
| S259  | <i>Pholcus erawan</i>                  | Thailand, Kanchanaburi, Erawan National Park, forest along stream                                  | 14.37    | 99.146    | A     |
| S260  | <i>Pholcus erawan</i>                  | Malaysia, Pulau Pinang, Penang National Park near Teluk Bahang                                     | 5.462    | 100.202   | A     |
| S024  | <i>Pholcus ethagala</i>                | Sri Lanka, Uva Prov., Badulla Distr., Bet. Diyaluma Falls & Well-<br>awaya                         | 6.725    | 81.029    | B     |
| SB017 | <i>Pholcus ethagala?</i>               | Sri Lanka, Western Prov., Gampaha Distric, Alawala                                                 | 7.123    | 80.186    | B     |
| P0158 | <i>Pholcus fagei</i>                   | Kenya, Coast Prov., Arabuko-Sokoke National Park                                                   | -3.283   | 39.967    | A     |
| P0159 | <i>Pholcus fagei</i>                   | Kenya, Coast Prov., Shimba Hills, near road Kwale-Kinango                                          | -4.203   | 39.418    | A     |
| P0287 | <i>Pholcus fengcheng</i>               | China, Liaoning, Fengcheng City, Mt. Fenghuang                                                     | 40.426   | 124.071   | D     |
| S105  | <i>Pholcus fragillimus</i>             | Taiwan, Taichung, Tunghai University campus                                                        | 24.176   | 120.6     | A     |
| S047  | <i>Pholcus G044</i>                    | Cape Verde, Fogo, Cueva de Gancho                                                                  | 14.924   | -24.334   | B     |
| S261  | <i>Pholcus gombak</i>                  | Malaysia, Selangor, Kemensah, forest along stream                                                  | 3.222    | 101.793   | A     |
| P0202 | <i>Pholcus Gui32</i>                   | Guinea, Basse-Guinée, near Koumbaya                                                                | 10.172   | -12.888   | G     |
| S262  | <i>Pholcus halabala</i>                | Thailand, Narathiwat, Hala Bala Wildlife Sanctuary, 'site 1', forest at<br>river near headquarters | 5.797    | 101.832   | A     |
| S365  | <i>Pholcus hurau</i>                   | Indonesia, Sumatra, Gua Limpa (Cave) above Harau Valley                                            | -0.104   | 100.68    | A     |
| S299  | <i>Pholcus jnwrum</i>                  | Australia, Queensland, Kings Plains, Cooktown                                                      | -15.485  | 145.256   | G     |
| P0288 | <i>Pholcus jiuwei</i>                  | China, Liaoning, Benxi City, Xing'an Village                                                       | 42.29    | 123.76    | D     |
| P0145 | <i>Pholcus kakum</i>                   | Guinea, Guinée Forestière, Forêt Classée de Zياما                                                  | 8.403    | -9.322    | A     |
| GB44  | <i>Pholcus kawit</i>                   | Philippines, Mindanao, Mt. Matutum, Kawit Forest, 'site 1'                                         | 6.338    | 125.104   | A     |
| S225  | <i>Pholcus kawit</i>                   | Philippines, Mindanao, Mt. Matutum, Kawit Forest, 'site 1'                                         | 6.338    | 125.104   | A     |
| S367  | <i>Pholcus kerinci</i>                 | Indonesia, Sumatra, Bukit Barisan                                                                  | -5.528   | 104.424   | A     |
| S268  | <i>Pholcus khaolek</i>                 | Thailand, Nakhon Si Thammarat, Khao Nan National Park, Tham<br>Khao Lek                            | 8.768    | 98.728    | A     |
| P0248 | <i>Pholcus kimi</i>                    | Laos, Oudomxay, ca 3 km E Tad Lak 11                                                               | 20.605   | 102.022   | A     |
| P0203 | <i>Pholcus kindia</i>                  | Guinea, Basse-Guinée, near Kindia                                                                  | 10.013   | -12.81    | G     |
| S186  | <i>Pholcus kipungit</i>                | Malaysia, Sabah, Poring Hot Springs, forest near beginning of Kipungit<br>Trail                    | 6.048    | 116.706   | A/J   |
| S502  | <i>Pholcus<br/>kottawagamaensis</i>    | Sri Lanka, Southern Prov., Kottawa Forest                                                          | 6.097    | 80.308    | A/B   |
| S267  | <i>Pholcus krabi</i>                   | Thailand, Krabi, Khao Phanom Bencha National Park, trails near<br>headquarters                     | 8.235    | 98.918    | A     |
| P0171 | <i>Pholcus kribi</i>                   | Cameroon, South Region, between Kribi and Campo, 'site 2'                                          | 2.673    | 9.857     | A     |
| S265  | <i>Pholcus kuhapimuk</i>               | Thailand, Yala, Wat Kuhapimuk, Tham Meud                                                           | 6.528    | 101.225   | A     |
| S183  | <i>Pholcus lambir</i>                  | Malaysia, Sarawak, Lambir Hills National Park                                                      | 4.203    | 114.04    | A     |
| S263  | <i>Pholcus ledang</i>                  | Malaysia, Johor, Gunung Ledang, forest near Puteri Falls                                           | 2.355    | 102.635   | A     |
| P0163 | <i>Pholcus leruthi</i>                 | Kenya, Western Prov., Kakamega Forest National Park, Arboretum<br>trail                            | 0.355    | 34.858    | G     |
| S185  | <i>Pholcus lintang</i>                 | Malaysia, Sarawak, Bako National Park, along Lintang Trail                                         | 1.718    | 110.452   | A     |
| JA42  | <i>Pholcus manueli</i>                 | USA, Pennsylvania, ~20 mi NE Stroudsburg                                                           | 41.217   | -74.867   | D     |
| BB19  | <i>Pholcus manueli (sp1<br/>Bruvo)</i> | USA, Pennsylvania, ~20 mi NE Stroudsburg                                                           | 41.217   | -74.867   | D     |
| S056  | <i>Pholcus maronita?</i>               | Israel, Judea and Samaria Distr., 'En Perat, Nahal Perat                                           | 31.833   | 35.311    | L     |
| S503  | <i>Pholcus maturata</i>                | Sri Lanka, Central Prov., Hakgala Forest                                                           | 6.93     | 80.814    | A     |
| S226  | <i>Pholcus matutum</i>                 | Philippines, Mindanao, Mt. Matutum, Kawit Forest, 'site 1'                                         | 6.338    | 125.104   | A     |
| S368  | <i>Pholcus mentawir</i>                | Indonesia, Borneo, East Kalimantan, Bukit Bankirai                                                 | -1.029   | 116.867   | A     |
| S053  | <i>Pholcus moca</i>                    | Gabon, Ogooué-Ivindo, near Djidji                                                                  | 0.213    | 11.822    | A     |
| P0230 | <i>Pholcus MRAC553</i>                 | Congo DR, Orientale, Basoko (Bokungu), old palm plantation                                         | 1.233    | 23.6      | A     |
| S188  | <i>Pholcus mulu</i>                    | Malaysia, Sarawak, Gunung Mulu National Park, forest near Deer<br>Cave                             | 4.027    | 114.818   | A     |
| S264  | <i>Pholcus narathiwat</i>              | Thailand, Narathiwat, Hala Bala Wildlife Sanctuary, 'site 2', forest<br>near river                 | 5.807    | 101.81    | A     |
| S273  | <i>Pholcus negara</i>                  | Thailand, Narathiwat, Hala Bala Wildlife Sanctuary, 'site 2', forest<br>near river                 | 5.807    | 101.81    | A     |
| GB45  | <i>Pholcus nkoetye</i>                 | Cameroon, South Region, near Ebolowa, Nkoetye                                                      | 2.857    | 11.362    | A     |
| P0270 | <i>Pholcus nkoetye</i>                 | Cameroon, South Region, near Ebolowa, Nkoetye                                                      | 2.857    | 11.362    | A     |
| GB46  | <i>Pholcus olangapo</i>                | Philippines, Luzon, near Olangapo, along river near Pamulaklakin For-<br>est Trail                 | 14.798   | 121.338   | A     |
| S014  | <i>Pholcus olangapo</i>                | Philippines, Luzon, near Olangapo, along river near Pamulaklakin For-<br>est Trail                 | 14.798   | 121.338   | A     |
| BB17  | <i>Pholcus opilionoides</i>            | Austria, Upper Austria, Reitpoidl near Linz                                                        | 48.38    | 14.277    | SA    |
| P0232 | <i>Pholcus ornatus</i>                 | Spain, Canary Isl., La Palma, Barranco de Agua (Los Tilos)                                         | 28.79    | -17.8     | L     |
| S065  | <i>Pholcus pagbilao</i>                | Philippines, Negros, Negros Oriental Prov., Casaroro Falls                                         | 9.281    | 123.208   | A     |
| S072  | <i>Pholcus pagbilao</i>                | Philippines, Luzon, between Lucban and Tayabas                                                     | 14.063   | 121.567   | A     |
| BB18a | <i>Pholcus phalangioides</i>           | Austria, Vienna, Vienna Ciy, house                                                                 | 48.228   | 16.371    | SA    |
| JA43  | <i>Pholcus phalangioides</i>           | Germany, Nordrhein-Westfalen, Bonn, Museum Koenig                                                  | 50.722   | 7.113     | SA    |
| P0286 | <i>Pholcus phoenixus</i>               | China, Liaoning, Zhangjiagon Village, cave                                                         | 40.507   | 124.176   | D     |
| S274  | <i>Pholcus phui</i>                    | Thailand, Narathiwat, Hala Bala Wildlife Sanctuary, 'site 2', forest<br>near river                 | 5.807    | 101.81    | A     |
| S236  | <i>Pholcus pingtung</i>                | Taiwan, Pingtung, Sheding Nature Park near Kenting                                                 | 21.957   | 120.821   | A     |
| S051  | <i>Pholcus puru</i>                    | Gabon, Ogooué-Ivindo, near Mohoba Mozeye                                                           | 0.28     | 13.348    | A     |
| S369  | <i>Pholcus quinquenotatus</i>          | Indonesia, Bali, Munduk                                                                            | -8.267   | 115.055   | A     |
| S052  | <i>Pholcus raviriae</i>                | Gabon, Ogooué-Ivindo, Monts de Belinga, forest near Mayebout                                       | 1.112    | 13.11     | A     |
| S182  | <i>Pholcus sabah</i>                   | Malaysia, Sabah, Sepilok, Rainforest Discovery Centre, forest along<br>Pitta Trail                 | 5.877    | 117.94    | A     |

| code  | species                                | locality                                                                         | latitude | longitude | biome |
|-------|----------------------------------------|----------------------------------------------------------------------------------|----------|-----------|-------|
| S275  | <i>Pholcus satun</i>                   | Thailand, Satun, Thaleban National Park, forest near headquarters                | 6.71     | 100.17    | A     |
| GB47  | <i>Pholcus schwendingeri</i>           | Thailand, Ranong, Klong Nakha Wildlife Sanctuary, 40 m a.s.l., forest            | 9.46     | 98.512    | A     |
| S276  | <i>Pholcus schwendingeri</i>           | Thailand, Ranong, Klong Nakha Wildlife Sanctuary, 40 m a.s.l., forest            | 9.46     | 98.512    | A     |
| S370  | <i>Pholcus sepaku</i>                  | Indonesia, East Kalimantan, Bukit Bankirai                                       | -1.029   | 116.867   | A     |
| S371  | <i>Pholcus singlarang</i>              | Indonesia, Sumatra, Lembah Anai Forest Reserve, forest along stream              | -0.472   | 100.363   | A     |
| S234  | <i>Pholcus SMF422</i>                  | Laos, Bolikhamsay, Nam Kading National Protected Area                            | 18.357   | 104.155   | A     |
| S104  | <i>Pholcus spilis</i>                  | Taiwan, Taichung, ~12 air km E Dongshi, near river                               | 24.288   | 120.946   | A     |
| GB48  | <i>Pholcus sudhami</i>                 | Thailand, Kanchanaburi, Erawan N.P., 85 m a.s.l., forest along stream            | 14.37    | 99.146    | A     |
| S277  | <i>Pholcus sudhami</i>                 | Thailand, Kanchanaburi, Erawan N.P., 85 m a.s.l., forest along stream            | 14.37    | 99.146    | A     |
| S471  | <i>Pholcus taarab</i>                  | Tanzania, Morogoro, Udzungwa Mts National Park, Sanje chini                      | -7.774   | 36.897    | A/G   |
| P0155 | <i>Pholcus taita</i>                   | Kenya, Coast Prov., Taita Hills, Ngangao Forest                                  | -3.37    | 38.34     | A     |
| S472  | <i>Pholcus tambunan</i>                | Malaysia, Sabah, Crocker Range between Kota Kinabalu and Tambunan, N-slope       | 5.834    | 116.336   | J     |
| S272  | <i>Pholcus tanahrata</i>               | Malaysia, Pahang, Cameron Highlands, forest along 'trail 9'                      | 4.46     | 101.392   | A     |
| P0258 | <i>Pholcus twa</i>                     | Uganda, Kisoro Distr., Mgahinga Gorilla National Park, at building               | -1.353   | 29.618    | A     |
| S269  | <i>Pholcus ubin</i>                    | Singapore, Pulau Ubin, degraded forest near park headquarters                    | 1.403    | 103.97    | A     |
| GB49  | <i>Pholcus uludong</i>                 | Malaysia, Pahang, Ulu Dong, 190 m a.s.l., forest near river                      | 3.942    | 102.027   | A     |
| S270  | <i>Pholcus uludong</i>                 | Malaysia, Pahang, Ulu Dong, 190 m a.s.l., forest near river                      | 3.942    | 102.027   | A     |
| S473  | <i>Pholcus wahehe</i>                  | Tanzania, Morogoro, Udzungwa Mts National Park, Sanje chini                      | -7.774   | 36.897    | I     |
| JA71  | <i>Physocyclus dugesi</i>              | Costa Rica, San José, San Pedro de Montes de Oca                                 | 9.94     | -84.05    | C     |
| S474  | <i>Physocyclus enaulus</i>             | USA, Texas, Big Bend National Park, Santa Elena, Terlingua Creek                 | 29.167   | -103.611  | M     |
| JA70  | <i>Physocyclus franckei</i>            | Mexico, Hidalgo, Reserva de Meztlán                                              | 20.6     | -98.766   | M     |
| BB21  | <i>Physocyclus globosus</i>            | Cuba, La Habana                                                                  | 23.12    | -82.42    | SA    |
| OG29  | <i>Pimoa breuili</i>                   | –                                                                                |          |           | na    |
| OG32  | <i>Pimoa sp</i>                        | –                                                                                |          |           | na    |
| S475  | <i>Pisaboa silvae</i>                  | Brazil, Amazonas, forest near Tabatinga                                          | -4.244   | -69.925   | A     |
| S372  | <i>Platnicknia Cu12-100</i>            | Cuba, Guantanamo, Baracoa, El Yunque, forest on eastern slope                    | 20.345   | -74.566   | A     |
| S115  | <i>Platnicknia Cu12-2</i>              | Cuba, Pinar del Río, Viñales, forest at base of mogote, 'site 2'                 | 22.627   | -83.735   | A     |
| S373  | <i>Platnicknia Cu12-61</i>             | Cuba, Camagüey, Sierra de Cubitas, Estación Limones-Tuabaquey                    | 21.597   | -77.786   | A     |
| S374  | <i>Platnicknia Cu12-99</i>             | Cuba, Guantanamo, Baracoa, forest along Duaba river                              | 20.332   | -74.569   | A     |
| IA07  | <i>Platnicknia incerta</i>             | Cuba, Santiago de Cuba, Estación Biológica La Platica, forest above station      | 20.01    | -76.889   | A     |
| S114  | <i>Platnicknia incerta</i>             | Cuba, Santiago de Cuba, Estación Biológica La Platica, forest above station      | 20.01    | -76.889   | A     |
| OG15  | <i>Plectreurys tristis</i>             | –                                                                                |          |           | na    |
| JA80  | <i>Priscula Astr07</i>                 | Peru, Ayacucho, Ciudad de Ayacucho, Wari ruins                                   | -13.15   | -74.217   | A     |
| JA114 | <i>Priscula binghamae</i>              | Bolivia, La Paz, La Paz                                                          | -16.5    | -68.167   | A     |
| JA22  | <i>Priscula Ven02/80-85</i>            | Venezuela, Monagas, Cueva del Guacharo to Salto la Palia                         | 10.175   | -63.558   | A     |
| S307  | <i>Priscula Ven02/80-85</i>            | Venezuela, Monagas, Cueva del Guacharo to Salto la Palia                         | 10.175   | -63.558   | A     |
| S476  | <i>Priscula venezuelana</i>            | Venezuela, Aragua, Parque Nacional Henri Pittier, Rancho Grande                  | 10.35    | -67.683   | A     |
| S477  | <i>Psilochorus concolor</i>            | USA, Texas, Big Bend National Park, Cat Tail Fall                                | 29.273   | -103.336  | C     |
| S046  | <i>Psilochorus imitatus</i>            | USA, Colorado, Clear Creek Co.                                                   | 39.75    | -105.567  | na    |
| BB24  | <i>Psilochorus imitatus=sp.1 Bruvo</i> | USA, Colorado, El Paso Co., Garden of the Gods                                   | 38.88    | -104.87   | na    |
| S478  | <i>Psilochorus pallidulus</i>          | USA, Texas, Big Bend National Park, Tuff Canyon                                  | 29.15    | -103.488  | M     |
| P0210 | <i>Psilochorus SA Br10-36</i>          | Brazil, Espirito Santo, Vargem Alta, Fazenda Monte Verde                         | -20.465  | -40.995   | A     |
| S032  | <i>Psilochorus SA Br11-40</i>          | Brazil, Bahia, Reserva Particular do Patrimônio Natural Serra Bonita             | -15.388  | -39.563   | A     |
| BB12a | <i>Psilochorus SA itagyurussu</i>      | Brazil, São Paulo, São Paulo, Parque Estadual de Cantareira                      | -23.4    | -46.58    | A     |
| P0219 | <i>Psilochorus SA itagyurussu</i>      | Brazil, São Paulo, São Paulo, Parque Estadual de Cantareira                      | -23.4    | -46.58    | A     |
| BB23  | <i>Psilochorus simoni</i>              | Germany, Nordrhein-Westfalen, Bonn, Museum Koenig                                | 50.722   | 7.113     | SA    |
| BB25  | <i>Quamtana bonamanzi</i>              | South Africa, KwaZulu Natal, Bonamanzi Reserve                                   | -28.067  | 32.3      | A     |
| GB50  | <i>Quamtana bonamanzi</i>              | South Africa, KwaZulu Natal, Bonamanzi Reserve                                   | -28.067  | 32.3      | A     |
| P0183 | <i>Quamtana Cam117</i>                 | Cameroon, Northwest Region, near Oku village                                     | 6.25     | 10.5      | A     |
| S291  | <i>Quamtana CAS5</i>                   | Madagascar, Fianarantsoa, Andringitra National Park, 34 km S Am-balavao          | -22.157  | 46.952    | A     |
| P0241 | <i>Quamtana CAS7</i>                   | South Africa, Eastern Cape, Colchester, Schelm Hoek, W of Sundays River          | -33.701  | 25.835    | L     |
| BB26  | <i>Quamtana embuleni</i>               | South Africa, Mpumalanga, Badplaas, Embuleni Reserve                             | -25.953  | 30.553    | G/J   |
| P0285 | <i>Quamtana filmeri</i>                | South Africa, KwaZulu Natal, Royal Natal National Park, Cascade falls pathway    | -28.69   | 28.937    | J     |
| P0262 | <i>Quamtana kabale</i>                 | Uganda, Kasese Distr., Ruwenzori Mts, near National Park gate                    | 0.355    | 30.027    | A/J   |
| S063  | <i>Quamtana kitahurira</i>             | Guinea, Guinée Forestière, Forêt de Zié near Gouan                               | 7.6      | -8.46     | A/G   |
| P0204 | <i>Quamtana nyahururu</i>              | Kenya, Rift Valley, Thompson Falls near Nyahururu                                | 0.045    | 36.368    | A     |
| P0243 | <i>Quamtana nylsvley?</i>              | South Africa, Eastern Cape, Kai Mouth, 58 km NE East London                      | -32.687  | 28.377    | A/G   |
| P0170 | <i>Quamtana oku</i>                    | Cameroon, Northwest Region, near Oku village                                     | 6.237    | 10.525    | A     |
| P0284 | <i>Quamtana umzinto</i>                | South Africa, KwaZulu Natal, Oribi Gorge Nature Reserve, Samango Waterfall trail | -30.71   | 30.27     | A     |
| BB27  | <i>Quamtana vidal</i>                  | South Africa, KwaZulu Natal, Cape Vidal                                          | -28.13   | 32.55     | A     |
| OG3   | <i>Rhode scutiventris</i>              | –                                                                                |          |           | na    |
| S279  | <i>Savarna kaeo</i>                    | Thailand, Prachuap Khiri Khan, Khao Sam Roi Yot National Park, Tham Sai          | 12.18    | 100.007   | A     |
| S278  | <i>Savarna kraburiensis</i>            | Thailand, Ranong, Tham Phra Kayang                                               | 10.326   | 98.765    | A     |
| S306  | <i>Savarna miser</i>                   | Malaysia, Selangor, Batu Caves                                                   | 3.239    | 101.683   | A     |

| code  | species                           | locality                                                                       | latitude | longitude | biome |
|-------|-----------------------------------|--------------------------------------------------------------------------------|----------|-----------|-------|
| S280  | <i>Savarna tessellata</i>         | Thailand, Yala, Wat Kuhapimuk, Tham Meud                                       | 6.528    | 101.225   | A     |
| S281  | <i>Savarna thalebana</i>          | Thailand, Satun, Thalebana National Park, forest and cave entrance             | 6.726    | 100.162   | A     |
| OG25  | <i>Segestria bavaria</i>          | –                                                                              |          |           | na    |
| OG21  | <i>Sicarius terrosus</i>          | –                                                                              |          |           | na    |
| S504  | <i>Sihala ceylonica</i>           | Sri Lanka, North Western Prov., Kurunegala, at base of Ethagala (Athugala) Mtn | 7.49     | 80.369    | A     |
| S505  | <i>Sihala SL43</i>                | Sri Lanka, Uva Prov., Inginiyagala                                             | 7.225    | 81.535    | B     |
| S506  | <i>Sihala SL63</i>                | Sri Lanka, Sabaragamuwa Prov., above Dematagala                                | 6.451    | 80.751    | A/B   |
| GB51  | <i>Smeringopina ankasa</i>        | Ghana, Western Region, Ankasa NP                                               | 5.217    | -2.651    | A     |
| S054  | <i>Smeringopina ankasa</i>        | Ghana, Western Region, Ankasa NP                                               | 5.217    | -2.651    | A     |
| P0173 | <i>Smeringopina attuleh</i>       | Cameroon, Southwest Region, near Dschang, Essotah                              | 5.425    | 9.912     | A     |
| S491  | <i>Smeringopina bamenda</i>       | Cameroon, Northwest Region, near Bamenda                                       | 6.008    | 10.302    | A     |
| GB14  | <i>Smeringopina bayaka</i>        | Gabon, Moyen-Ogooué, near Ndjolé, 'site 2'                                     | -0.098   | 10.873    | A     |
| GB15  | <i>Smeringopina belinga</i>       | Gabon, Ogooué-Ivindo, Monts de Belinga                                         | 0.978    | 13.192    | A     |
| P0152 | <i>Smeringopina bineti</i>        | Guinea, Moyenne-Guinée, Dalaba                                                 | 10.677   | -12.267   | A     |
| S300  | <i>Smeringopina bomfobiri</i>     | Ghana, Ashanti Region, Bomfobiri Wildlife Sanctuary                            | 6.962    | -1.191    | A     |
| S492  | <i>Smeringopina bwiti</i>         | Gabon, Ngounié, near Mouloundoufouala                                          | -1.635   | 10.708    | A/G   |
| S042  | <i>Smeringopina camerunensis</i>  | Cameroon, Littoral Region, near Douala                                         | 4.01     | 9.798     | A/N   |
| GB16  | <i>Smeringopina chaillu</i>       | Gabon, Ngounié, Massif du Chaillu, 'site 4', between Yéno and Mouila           | -1.728   | 11.307    | A     |
| S404  | <i>Smeringopina djidji</i>        | Gabon, Ogooué-Ivindo, near Djidji                                              | 0.213    | 11.822    | A     |
| GB52  | <i>Smeringopina ebolowa</i>       | Cameroon, South Region, near Ebolowa                                           | 2.915    | 11.138    | A     |
| P0175 | <i>Smeringopina ebolowa</i>       | Cameroon, South Region, near Ebolowa                                           | 2.915    | 11.138    | A     |
| GB17  | <i>Smeringopina essotah</i>       | Cameroon, Southwest Region, near Dschang, Essotah                              | 5.425    | 9.912     | A     |
| GB18  | <i>Smeringopina fang</i>          | Gabon, Ogooué-Ivindo, near Djidji                                              | 0.213    | 11.822    | A     |
| P0153 | <i>Smeringopina guineensis</i>    | Guinea, Guinée Forestière, Forêt Classée de Diéké                              | 7.533    | -8.832    | A     |
| GB19  | <i>Smeringopina iboga</i>         | Gabon, Ngounié, near Mouloundoufouala                                          | -1.635   | 10.708    | G     |
| S041  | <i>Smeringopina kala</i>          | Cameroon, Centre Region, near Yaoundé, Mt. Kala                                | 3.85     | 11.338    | A     |
| S402  | <i>Smeringopina kinguele</i>      | Gabon, Estuaire, Monts de Cristal, between Tchimbélé and Kingué                | 0.563    | 10.313    | A     |
| S044  | <i>Smeringopina kribi</i>         | Cameroon, South Region, between Kribi and Campo, 'site 1'                      | 2.703    | 9.863     | A     |
| GB20  | <i>Smeringopina lekoni</i>        | Gabon, Haut Ogooué, forest at Lékon River                                      | -1.178   | 13.538    | G     |
| S043  | <i>Smeringopina mbouda</i>        | Cameroon, West Region, near Mbouda, Bamboutos                                  | 5.622    | 10.112    | A     |
| S403  | <i>Smeringopina mohoba</i>        | Gabon, Ogooué-Ivindo, near Mohoba Mozeye                                       | 0.28     | 13.348    | A     |
| S049  | <i>Smeringopina moudouma</i>      | Gabon, Ogooué-Lolo, near Moudouma                                              | -1.392   | 12.16     | A     |
| GB21  | <i>Smeringopina ndjole</i>        | Gabon, Moyen-Ogooué, near Ndjolé, 'site 1'                                     | -0.15    | 10.667    | A     |
| P0180 | <i>Smeringopina nyasoso</i>       | Cameroon, Southwest Region, Mt. Koupé above Nyasoso                            | 4.827    | 9.685     | A     |
| S405  | <i>Smeringopina ogooue</i>        | Gabon, Ogooué-Ivindo, Monts de Belinga, NE Makokou                             | 0.783    | 13.138    | A     |
| GB22  | <i>Smeringopina sahoue</i>        | Gabon, Estuaire, forest near Sahoué, N Libreville                              | 0.577    | 9.34      | N     |
| S493  | <i>Smeringopina simintang</i>     | Gabon, Ogooué-Ivindo, Ivindo National Park near Simintang                      | 0.537    | 12.688    | A     |
| S301  | <i>Smeringopina tchimbele</i>     | Gabon, Estuaire, Monts de Cristal, between Tchimbélé and Kingué                | 0.563    | 10.313    | A     |
| GB54  | <i>Smeringopina tebe</i>          | Gabon, Ogooué-Ivindo, N Tébé                                                   | -0.038   | 13.682    | A     |
| S050  | <i>Smeringopina tebe</i>          | Gabon, Ogooué-Ivindo, N Tébé                                                   | -0.038   | 13.682    | A     |
| S017  | <i>Smeringopus arambourgi</i>     | Ethiopia, Oromia, Sof Omar village                                             | 6.903    | 40.851    | A     |
| P0224 | <i>Smeringopus atomarius?</i>     | Namibia, Hardap, ~30 km W Betta                                                | -25.32   | 16.16     | M     |
| P0266 | <i>Smeringopus bujongolo</i>      | Uganda, Kasese Distr., Ruwenzori Mts, near Nyabitaba Hut                       | 0.358    | 29.978    | J     |
| P0161 | <i>Smeringopus chogoria</i>       | Kenya, Eastern Prov., Mt. Kenya National Park, Chogoria Forest, 'site 1'       | -0.202   | 37.49     | A     |
| P0143 | <i>Smeringopus cylindrogaster</i> | Guinea, Guinée Forestière, Forêt Classée de Diéké                              | 7.533    | -8.832    | A     |
| P0178 | <i>Smeringopus cylindrogaster</i> | Cameroon, South Region, near Kribi                                             | 2.9      | 9.907     | A     |
| GB24  | <i>Smeringopus isangi</i>         | Congo DR, Orientale, Yaekama (Isangi)                                          | 0.767    | 24.3      | A     |
| S407  | <i>Smeringopus lesserti</i>       | Gabon, Ogooué-Ivindo, Monts de Belinga, Mayebout                               | 1.115    | 13.107    | A     |
| S408  | <i>Smeringopus lotzi</i>          | South Africa, Free State, Erfenis Dam Nature Reserve                           | -28.498  | 26.806    | M     |
| P0257 | <i>Smeringopus mgahinga</i>       | Uganda, Kisoro Distr., Mgahinga Gorilla National Park, Garama Cave             | -1.357   | 29.632    | A     |
| P0265 | <i>Smeringopus mpanga</i>         | Uganda, Bundibugyo Distr., between Sempaya and Itajo                           | 0.838    | 30.173    | A/G   |
| BB28  | <i>Smeringopus natalensis</i>     | South Africa, Mpumalanga, Badplaas, Embuleni Reserve                           | -25.953  | 30.553    | J     |
| P0157 | <i>Smeringopus ngangao</i>        | Kenya, Coast Prov., Taita Hills, Ngangao Forest                                | -3.37    | 38.34     | A     |
| P0264 | <i>Smeringopus pallidus</i>       | Uganda, Bushenyi Distr., near Ryeru, in hotel                                  | -0.262   | 30.105    | SA    |
| S406  | <i>Smeringopus peregrinoides</i>  | Uganda, Kanungu Distr., Buhoma                                                 | -0.982   | 29.617    | G     |
| P0227 | <i>Smeringopus similis?</i>       | Namibia, Otjozondjupa, Otavi town, camp                                        | -19.633  | 17.333    | G     |
| GB55  | <i>Spermophora akwamu</i>         | Ghana, Central Region, Kakum Forest                                            | 5.348    | -1.384    | A     |
| S018  | <i>Spermophora akwamu</i>         | Ghana, Central Region, Kakum Forest                                            | 5.348    | -1.384    | A     |
| P0187 | <i>Spermophora awalai</i>         | Cameroon, Southwest Region, Mt. Koupé above Nyasoso                            | 4.827    | 9.685     | A     |
| GB56  | <i>Spermophora bukusu</i>         | Kenya, Rift Valley, Mt. Elgon N.P., along Kimothon River                       | 1.077    | 34.725    | A     |
| P0273 | <i>Spermophora bukusu</i>         | Kenya, Rift Valley, Mt. Elgon N.P., along Kimothon River                       | 1.077    | 34.725    | A     |
| S376  | <i>Spermophora cf akwamu</i>      | Gabon, Ogooué-Ivindo, Monts de Belinga, NE Makokou                             | 0.783    | 13.138    | A     |
| GB27  | <i>Spermophora dieke</i>          | Guinea, Guinée Forestière, Forêt Classée de Diéké                              | 7.533    | -8.832    | A     |

| code  | species                                 | locality                                                                           | latitude | longitude | biome |
|-------|-----------------------------------------|------------------------------------------------------------------------------------|----------|-----------|-------|
| S055  | <i>Spermophora dieke</i>                | Guinea, Guinée Forestière, Forêt Classée de Diéké                                  | 7.533    | -8.832    | A     |
| S019  | <i>Spermophora estebani</i>             | Philippines, Luzon, between Lucban and Tayabas                                     | 14.063   | 121.567   | A     |
| S375  | <i>Spermophora Ind27</i>                | Indonesia, Sumatra, Bukittinggi, degraded forest in canyon, 'site 1'               | -0.301   | 100.344   | A     |
| S335  | <i>Spermophora Ind90</i>                | Indonesia, Sulawesi, Susuripen Cave on Mt. Mahawu near Tomohon                     | 1.341    | 124.864   | A     |
| P0189 | <i>Spermophora kirinyaga</i>            | Kenya, Eastern Prov., Mt. Kenya National Park, Chogoria Forest, 'site 2'           | -0.237   | 37.567    | G     |
| GB57  | <i>Spermophora kyambura</i>             | Uganda, Bushenyi Distr., Kyambura River Gorge                                      | -0.178   | 30.097    | A     |
| P0174 | <i>Spermophora kyambura</i>             | Cameroon, South Region, near Ebolowa                                               | 2.915    | 11.138    | A     |
| P0263 | <i>Spermophora kyambura</i>             | Uganda, Bushenyi Distr., Kyambura River Gorge                                      | -0.178   | 30.097    | A     |
| P0184 | <i>Spermophora maathaiia</i>            | Kenya, Eastern Prov., Mt. Kenya National Park, Chogoria Forest, 'site 1'           | -0.202   | 37.49     | J     |
| S282  | <i>Spermophora Mal2</i>                 | Singapore, Dairy Farm Nature Park                                                  | 1.36     | 103.778   | A     |
| GB58  | <i>Spermophora mau</i>                  | Kenya, Rift Valley, Mau Escarpment near Elburgon                                   | -0.422   | 35.788    | A     |
| P0275 | <i>Spermophora mau</i>                  | Kenya, Rift Valley, Mau Escarpment near Elburgon                                   | -0.422   | 35.788    | A     |
| P0164 | <i>Spermophora minotaura</i>            | Kenya, Rift Valley, Thompson Falls near Nyahururu                                  | 0.045    | 36.368    | A     |
| P0186 | <i>Spermophora minotaura</i>            | Kenya, Central Prov., Mt. Kenya National Park, Naro Moru Forest                    | -0.173   | 37.21     | A     |
| P0272 | <i>Spermophora minotaura</i>            | Kenya, Eastern Prov., Mt. Kenya National Park, Chogoria Forest, 'site 1'           | -0.202   | 37.49     | A     |
| P0278 | <i>Spermophora minotaura</i>            | Kenya, Central Prov., Mt. Kenya National Park, above Naro Moru Forest, small cave  | -0.167   | 37.233    | A     |
| P0226 | <i>Spermophora MRAC525</i>              | Congo DR, Equator, Mbangi, old secondary forest                                    | 2.117    | 21.733    | A     |
| S020  | <i>Spermophora Phi109</i>               | Philippines, Mindanao, CEDAR (Center for Ecological Development and Recreation)    | 8.251    | 125.034   | A     |
| BB29  | <i>Spermophora senoculata</i>           | USA, New York, New York City, house                                                | 40.716   | -73.776   | SA    |
| S311  | <i>Spermophora senoculata</i>           | Greece, Crete, Praisos                                                             | 35.123   | 26.09     | SA    |
| S479  | <i>Spermophora tonkoui</i>              | Guinea, Guinée Forestière, Mt. Nimba, Pompage Zié                                  | 7.6      | -8.46     | A     |
| GB59  | <i>Spermophora ziama</i>                | Guinea, Guinée Forestière, Forêt Classée de Ziama                                  | 8.403    | -9.322    | A     |
| P0185 | <i>Spermophora ziama</i>                | Guinea, Guinée Forestière, Forêt Classée de Ziama                                  | 8.403    | -9.322    | A     |
| P0256 | <i>Spermophorides cuneata</i>           | Spain, Canary Isl., Gran Canaria, Rinar de Tamadaba                                | 28.058   | -15.688   | L     |
| NA001 | <i>Spermophorides fuerteventurensis</i> | Spain, Canary Isl., La Palma, Lomas de Doña María                                  | 28.64    | -17.834   | L     |
| NA002 | <i>Spermophorides mercedes</i>          | Spain, Canary Isl., Fuerteventura, Jandía, Barranco de los Canarios                | 28.109   | -14.303   | L     |
| S308  | <i>Stenosfemuraia cuadrata</i>          | Venezuela, Aragua, Colonia Tovar                                                   | 10.417   | -67.3     | A     |
| S108  | <i>Stygopholcus absoloni?</i>           | Bosnia-Herzegovina, Trebinje, Ilijina pecina                                       | 42.719   | 18.303    | L     |
| S109  | <i>Stygopholcus absoloni?</i>           | Montenegro, near Nikšić, Studena?ka pecina                                         | 42.768   | 18.931    | L     |
| S112  | <i>Stygopholcus absoloni?</i>           | Montenegro, near Zve?ava, Pe?ina u Ivici (cave)                                    | 42.538   | 18.621    | L     |
| S110  | <i>Stygopholcus Bal3</i>                | Bosnia-Herzegovina, Vjetrenica pe?ina                                              | 42.847   | 17.984    | L     |
| S317  | <i>Stygopholcus photophilus</i>         | Greece, Crete, Episkopi                                                            | 35.342   | 24.765    | L     |
| BB31  | <i>Systemita prasina</i>                | Venezuela, Aragua, Colonia Tovar                                                   | 10.417   | -67.3     | A     |
| JA88  | <i>Systemita prasina</i>                | Venezuela, Aragua, Colonia Tovar                                                   | 10.417   | -67.3     | A     |
| JA131 | <i>Tainonia samana</i>                  | Dom. Rep., Samaná, S Las Galeras                                                   | 19.213   | -69.218   | A     |
| S480  | <i>Tainonia serripes</i>                | Dom. Rep., San Cristóbal, near Medina                                              | 18.513   | -70.123   | A     |
| JA134 | <i>Tainonia visite</i>                  | Haiti, Dept Sud-Est, La Visite National Park, Case Dent                            | 18.337   | -72.273   | C     |
| OG31  | <i>Tetragnatha versicolor_A</i>         | -                                                                                  | -        | -         | na    |
| S302  | <i>Trichocyclus balladong</i>           | Australia, Western Australia, Murchison, Mid West Region, Mt. Forrest              | -28.745  | 119.94    | L     |
| BB32  | <i>Trichocyclus cf balladong</i>        | Australia, Western Australia, Gundaring Nature Reserve                             | -31.853  | 117.632   | L     |
| S303  | <i>Trichocyclus cf warianga</i>         | Australia, Western Australia, Fortescue, Pilbara Region, Kutayi, drill hole ML0701 | -22.54   | 120.032   | M     |
| S384  | <i>Tupigea ale</i>                      | Brazil, Rio de Janeiro, ~3.5 km NW Parati                                          | -23.192  | -44.732   | A     |
| JA48  | <i>Tupigea angelim</i>                  | Brazil, São Paulo, Ubatuba, Fazenda Angelim                                        | -22.615  | -52.298   | A     |
| S481  | <i>Tupigea angelim</i>                  | Brazil, São Paulo, Ubatuba, Fazenda Angelim                                        | -22.615  | -52.298   | A     |
| S494  | <i>Tupigea Br10-32</i>                  | Brazil, Espirito Santo, Vargem Alta, Fazenda Monte Verde                           | -20.465  | -40.995   | A     |
| S411  | <i>Tupigea Br10-40</i>                  | Brazil, Espirito Santo, Vargem Alta, Fazenda Monte Verde                           | -20.465  | -40.995   | A     |
| S409  | <i>Tupigea Br14-47</i>                  | Brazil, Santa Catarina, Serra Geral National Park, Churriado Canyon                | -29.137  | -49.953   | A     |
| JA13  | <i>Tupigea cantareira</i>               | Brazil, São Paulo, São Paulo, Parque Estadual de Cantareira                        | -23.4    | -46.58    | A     |
| P0218 | <i>Tupigea maza</i>                     | Brazil, Rio de Janeiro, Cachoeiras de Macacu, Res. Ecol. Guapiaçú                  | -22.415  | -42.745   | A     |
| P0214 | <i>Tupigea nadleri</i>                  | Brazil, Rio de Janeiro, Santa Maria Madalena, forest fragment                      | -21.983  | -41.957   | A     |
| GB30  | <i>Tupigea paula</i>                    | Brazil, Rio Grande do Sul, São Francisco de Paula National Forest                  | -29.43   | -50.392   | A     |
| S377  | <i>Tupigea penedo</i>                   | Brazil, Rio de Janeiro, ~4 km NW Penedo                                            | -22.408  | -44.553   | G     |
| S385  | <i>Tupigea teresopolis?</i>             | Brazil, Rio de Janeiro, ~4 km NW Penedo                                            | -22.408  | -44.553   | A/G   |
| OG12  | <i>Uloborus glommosus</i>               | -                                                                                  | -        | -         | na    |
| OG13  | <i>Uroctea durandi</i>                  | -                                                                                  | -        | -         | na    |
| S283  | <i>Uthina huifengi?</i>                 | Thailand, Surat Thani, Khao Sok National Park, forest along nature trail           | 8.913    | 98.498    | A     |
| S378  | <i>Uthina Ind119</i>                    | Indonesia, Bali, Lake Tambligan, forest along SE side of lake                      | -8.265   | 115.098   | A     |
| S379  | <i>Uthina Ind121</i>                    | Indonesia, Bali, Lake Tambligan, forest along SE side of lake                      | -8.265   | 115.098   | A     |
| S380  | <i>Uthina Ind67</i>                     | Indonesia, Sulawesi, Bantimurung, Gua Mimpi (cave)                                 | -5.019   | 119.686   | A     |
| S284  | <i>Uthina khaosokensis</i>              | Thailand, Surat Thani, Khao Sok National Park, Tham Panthurat                      | 8.901    | 98.525    | A     |

| code  | species                     | locality                                                                           | latitude | longitude | biome |
|-------|-----------------------------|------------------------------------------------------------------------------------|----------|-----------|-------|
| S102  | <i>Uthina luzonica</i>      | Taiwan, Pingtung, near Danlu                                                       | 22.21    | 120.76    | A     |
| S217  | <i>Uthina luzonica</i>      | Malaysia, Sarawak, Niah Cave National Park, forest near headquarters               | 3.82     | 113.763   | A     |
| S285  | <i>Uthina ratchaburi</i>    | Thailand, Ratchaburi, Wat Huai Takaeng                                             | 13.587   | 99.759    | A     |
| SB052 | <i>Wanniyala agrabopath</i> | Sri Lanka, Central Prov., Nuwara ELLiya District, Hakgala Strict Natural Reserve   | 6.911    | 80.793    | A     |
| S022  | <i>Wanniyala SL71</i>       | Sri Lanka, Southern Prov., Galle Distr., Kottawa                                   | 6.098    | 80.313    | A     |
| SB063 | <i>Wanniyala SL61</i>       | Sri Lanka, Uva Prov., Badulla District, along Passara-Ella road (B113), Namunukula | 6.867    | 81.117    | A     |
| S507  | <i>Wanniyala SL38</i>       | Sri Lanka, Uva Prov., near Okkampitiya                                             | 6.728    | 81.336    | B     |
| S508  | <i>Wanniyala SL55</i>       | Sri Lanka, Sabaragamuwa Prov., above Dematagala                                    | 6.451    | 80.751    | A/B   |
| S509  | <i>Wanniyala SL61</i>       | Sri Lanka, Uva Prov., near Ohiya                                                   | 6.807    | 80.848    | A     |
| S304  | <i>Waunana modesta?</i>     | Colombia, Choco, Jardin Botanico del Pacifico, Trail to Mirador                    | 6.266    | -77.375   | A     |
| S293  | <i>Wugigarra kalamai</i>    | Australia, Western Australia, Murchison, Mid West Region, Mt. Forrest              | -28.673  | 119.96    | L/M   |
| S233  | <i>Wugigarra QMB5</i>       | Australia, Queensland, Boombana National Park                                      | -27.402  | 152.79    | D     |
| P0251 | <i>Wugigarra undanbi</i>    | Australia, Queensland, Boombana National Park                                      | -27.402  | 152.79    | D     |
| S232  | <i>Wugigarra yawai</i>      | Australia, Queensland, Redlands, site 3                                            |          |           | D     |
| S381  | <i>Wugigarra? Ind107</i>    | Indonesia, West Papua, Manokwari, Gunung Meja                                      | -0.86    | 134.084   | A     |
| S495  | <i>Wugigarra? Ind117</i>    | Indonesia, Ternate, at Danau Tolire (lake)                                         | 0.83     | 127.311   | A     |
| S382  | <i>Wugigarra? Ind82</i>     | Indonesia, Sulawesi, Tinoor Fall near Tomohon                                      | 1.382    | 124.836   | A     |
| S496  | <i>Wugigarra? Ind96</i>     | Indonesia, West Papua, Arfak Mountains, forest above Mokwam                        | -1.112   | 133.911   | A     |
| P0240 | <i>Zatavua analalava?</i>   | Madagascar, Toamasina, Masoala National Park                                       | -15.708  | 49.965    | A     |
| S045  | <i>Zatavua CAS8</i>         | Madagascar, Toamasina, Masoala National Park                                       | -15.57   | 50.003    | A     |
| OG33  | <i>Zygiella x-notata</i>    | -                                                                                  |          |           | na    |

**Table S3:** Forward and reverse primers used in the study.

| locus | sequence                                                                                | reference                                        |
|-------|-----------------------------------------------------------------------------------------|--------------------------------------------------|
| 12S   | 12S-ai 5'-AAACTAGGATTAGATACCCTATTAT-3'<br>12S-bi 5'-AAGAGCGACGGGCGATGTGT-3'             | Simon et al. (1994)                              |
| 16S   | 16s1471-mod: 5'-GCCTGTTTAWCAAAAACAT-3'<br>16sbr-H-mod: 5'-CCGGTYTGAACCTCARATCAYGT-3'    | Astrin et al. (2006)                             |
| 18S   | 18S-7F 5'-GCAATAACAGGTCTGTGATGCCC-3'<br>18S-9R 5'-GATCCTTCCGCAGGTTACCTAC-3'             | Giribet et al. (1996) /<br>Whiting et al. (1997) |
| 28S   | 28S-B1 5'-GACCGATAGCAAACAAGTACCG-3'<br>28S-B2 5'-GATTAGTCTTTCGCCCTATA-3'                | Bruvo-Madarić et al. (2005)                      |
| CO1   | LCO1490-JJ2 5'-CHACWAAYCAYAARGAYATYGG-3'<br>HCO2198-JJ2 5'-ANACTTCNNGRTGNCCAAARAATCA-3' | Astrin et al. (2016)                             |
| H3    | H3aF 5'-ATGGCTCGTACCAAGCAGACVGC-3'<br>H3aR 5'-ATATCCTTRGGCATRATRGTGAC-3'                | Blackledge et al. (2009)                         |



**Table S4:** Codes of the specimens contributing to the respective chimera. Chimera codes are used in the trees.

| code | genus                  | species                        | 12S   | 16S   | 18S   | 28S   | CO1   | H3    |
|------|------------------------|--------------------------------|-------|-------|-------|-------|-------|-------|
| CH01 | <i>Carapoia</i>        | <i>paraguaensis</i>            | BB02  | JA97  |       | JA97  | JA97  |       |
| CH02 | <i>Leptopholcus</i>    | <i>dschang</i>                 | P0192 | P0192 | P0192 | P0192 | P0176 | P0192 |
| CH03 | <i>Mesabolivar</i>     | <i>yuruani</i>                 | BB07  | JA101 |       | JA101 | JA101 |       |
| CH04 | <i>Pholcus</i>         | <i>manueli</i>                 | BB19  | JA42  |       | BB19  | BB19  |       |
| CH05 | <i>Priscula</i>        | <i>Ven02/80-85=sp.1 Astrin</i> |       | S307  |       |       | JA22  | S307  |
| CH06 | <i>Systenita</i>       | <i>prasina</i>                 | BB31  |       |       | BB31  | JA88  |       |
| CH07 | <i>Modisimus</i>       | <i>Cu12-11</i>                 |       | IA03  |       | S106  | IA03  |       |
| CH08 | <i>Platnicknia</i>     | <i>incerta</i>                 |       | IA07  |       |       | S114  | S114  |
| CH09 | <i>Psilochorus SA</i>  | <i>itaguayrussu</i>            | BB12a | BB12a | P0219 | P0219 | P0219 | P0219 |
| CH10 | <i>Aetana</i>          | <i>omayan</i>                  | S001  | S001  | S001  | S001  | GB02  | S001  |
| CH11 | <i>Aetana</i>          | <i>lambir</i>                  |       |       | S121  | S121  | GB04  |       |
| CH12 | <i>Carapoia</i>        | <i>dandarae</i>                |       | S033  | S033  | S033  | GB05  | S033  |
| CH13 | <i>Pholcus</i>         | <i>domingo</i>                 | S013  |       |       |       | GB13  |       |
| CH14 | <i>Spermophora Afr</i> | <i>dieke</i>                   | S055  | S055  | S055  |       | GB27  |       |
| CH15 | <i>Aetana</i>          | <i>loboc</i>                   |       | S069  | S069  | S069  | GB31  | S069  |
| CH16 | <i>Aetana</i>          | <i>manansalai</i>              |       | S073  | S073  | S073  | GB32  | S073  |
| CH17 | <i>Calapnita</i>       | <i>semengoh</i>                | S135  |       |       |       | GB33  | S135  |
| CH18 | <i>Carapoia</i>        | <i>capixaba</i>                | S027  | S027  | S027  | S027  | GB34  | S027  |
| CH19 | <i>Carapoia</i>        | <i>gracilis</i>                |       | S030  | S030  |       | GB35  | S030  |
| CH20 | <i>Leptopholcus</i>    | <i>budongo</i>                 |       |       | P0260 | P0260 | GB36  | P0260 |
| CH21 | <i>Micropholcus</i>    | <i>baoruco</i>                 | P0166 |       | P0166 |       | GB37  | P0166 |
| CH22 | <i>Micropholcus</i>    | <i>piaui</i>                   |       | Mic10 | Mic10 | Mic10 | GB38  | Mic10 |
| CH23 | <i>Micropholcus</i>    | <i>ubajara</i>                 |       |       | Mic11 |       | GB39  | Mic11 |
| CH24 | <i>Panjange</i>        | <i>iban</i>                    | S169  |       |       | S169  | GB40  |       |
| CH25 | <i>Panjange</i>        | <i>kubah</i>                   | S171  |       |       | S171  | GB41  |       |
| CH26 | <i>Panjange</i>        | <i>seowi</i>                   | S170  |       |       | S170  | GB42  |       |
| CH27 | <i>Pholcus</i>         | <i>bamboutos</i>               | P0181 | P0181 |       |       | GB43  | P0181 |
| CH28 | <i>Pholcus</i>         | <i>kawit</i>                   | S225  | S225  |       |       | GB44  |       |
| CH29 | <i>Pholcus</i>         | <i>nkoetye</i>                 | P0270 | P0270 |       |       | GB45  | P0270 |
| CH30 | <i>Pholcus</i>         | <i>olangapo</i>                | S014  | S014  | S014  | S014  | GB46  |       |
| CH31 | <i>Pholcus</i>         | <i>schwendingeri</i>           | S276  | S276  |       | S276  | GB47  | S276  |
| CH32 | <i>Pholcus</i>         | <i>sudhami</i>                 | S277  | S277  | S277  |       | GB48  | S277  |
| CH33 | <i>Pholcus</i>         | <i>uludong</i>                 | S270  |       | S270  | S270  | GB49  |       |
| CH34 | <i>Quamtana</i>        | <i>bonamanzi</i>               | BB25  |       |       | BB25  | GB50  |       |
| CH35 | <i>Smeringopina</i>    | <i>ankasa</i>                  |       | S054  | S054  |       | GB51  |       |
| CH36 | <i>Smeringopina</i>    | <i>ebolowa</i>                 | P0175 | P0175 |       |       | GB52  | P0175 |
| CH37 | <i>Smeringopina</i>    | <i>tebe</i>                    | S050  | S050  | S050  |       | GB54  |       |
| CH38 | <i>Spermophora Afr</i> | <i>akwamu</i>                  | S018  |       | S018  |       | GB55  | S018  |
| CH39 | <i>Spermophora Afr</i> | <i>bukusu</i>                  | P0273 | P0273 | P0273 |       | GB56  |       |
| CH40 | <i>Spermophora Afr</i> | <i>kyambura</i>                | P0263 | P0263 | P0263 |       | GB57  | P0263 |
| CH41 | <i>Spermophora Afr</i> | <i>mau</i>                     | P0275 |       | P0275 | P0275 | GB58  | P0275 |
| CH42 | <i>Spermophora Afr</i> | <i>ziama</i>                   | P0185 |       | P0185 |       | GB59  | P0185 |
| CH43 | <i>Belisana</i>        | <i>aninaj</i>                  | S415  |       | S238  | S415  | S415  |       |
| CH44 | <i>Pholcus</i>         | <i>andulau</i>                 | S469  |       |       |       | S469  | S178  |
| CH45 | <i>Tupigea</i>         | <i>angelim</i>                 | S481  | JA48  | S481  | S481  | JA48  | S481  |
| CH46 | <i>Aetana</i>          | <i>ocampoi</i>                 | S007  |       | S007  | S007  | GB70  | S007  |
| CH47 | <i>Artema</i>          | <i>nephilit</i>                |       | S325  | S325  |       | GB03  |       |
| CH48 | <i>Hantu</i>           | <i>kapit</i>                   | S412  |       | S412  | S122  | S412  | S412  |
| CH49 | <i>Psilochorus</i>     | <i>imitatus</i>                | BB24  | S046  | S046  | BB24  | BB24  |       |
| CH50 | <i>Carapoia</i>        | <i>macacu</i>                  |       | P0207 | P0207 | P0207 | P0206 | P0207 |
| CH51 | <i>Pholcus</i>         | <i>phalangioides</i>           | BB18a | BB18a |       |       | JA43  |       |
| CH52 | <i>Pholcus</i>         | <i>fagei</i>                   | P0158 | P0158 | P0158 |       | P0159 | P0158 |

**Table S5:** Calibration points for divergence time estimation used in the employed methods. Units are Million years except for MCMCtree (100 My). BEAST lognormal means are in real space.

|                  | RelTime/treePL | MCMCtree (heavy tailed cauchy) |      |     |      |      |       | BEAST (lognormal) |      |        |
|------------------|----------------|--------------------------------|------|-----|------|------|-------|-------------------|------|--------|
|                  |                | tL                             | p    | c   | 2.5% | mode | 97.5% | mean              | s.d. | offset |
| Dysderidae       | min 35/125*    | 0.35                           | 2.57 | 0.4 | 0.35 | 1.25 | 3.07  | 0                 | 1    | 35     |
| Segestriidae     | min 125        | 1.25                           | 0.04 | 0.1 | 1.25 | 1.3  | 3.8   | 0                 | 1.5  | 125    |
| Araneidae        | min 115        | 1.15                           | 0.03 | 0.1 | 1.15 | 1.18 | 3.59  | 0                 | 1    | 115    |
| Pimoidae         | min 35         | 0.35                           | 2.29 | 0.4 | 0.35 | 1.15 | 2.99  | 0                 | 1    | 35     |
| Micropholcus     | min 20         | 0.2                            | 0.63 | 0.5 | 0.2  | 0.33 | 1.9   | 0                 | 1.96 | 20     |
| Macaron. Pholcus | max 14         | 0.01                           | 6    | 0.5 | 0.01 | 0.07 | 0.13  | 6                 | 0.6  | 0      |
| root             | max 400**      | max 400                        |      |     |      |      |       |                   |      |        |

\* treePL: failure to initialize analysis with older nested clade; \*\* for treePL only

**Table S6:** Monophyletic groups used for species number estimates (compare Fig. S3). Currently described, misplaced, and unpublished species are listed and sum up to an improved number of currently known species (C-M+U; updated in October 2017). These numbers were multiplied with factor 2 or 3 to obtain an estimate of total species number (see main text for more detailed explanation).

| Node                                                         | Current | Mispl. | Unpubl. | C-M+U | Mult. by | Estimate |
|--------------------------------------------------------------|---------|--------|---------|-------|----------|----------|
| 1. Artema                                                    | 8       |        | 3       | 11    | 2        | 22       |
| 2. Ninetinae                                                 | 31      |        | 13      | 44    | 3        | 132      |
| 3. Priscula                                                  | 17      |        | 7       | 24    | 3        | 72       |
| 4. Geneve59 + Chisosa                                        | 2       |        | 1       | 3     | 3        | 9        |
| 5. 'Holocneminus' huangdi + Nita                             | 2       |        |         | 2     | 3        | 6        |
| 6. Physocyclus                                               | 34      | -2     |         | 32    | 2        | 64       |
| 7. 'Wugigarra' Indonesia                                     |         |        | 9       | 9     | 3        | 27       |
| 8. Trichocyclus                                              | 23      |        | 5       | 28    | 2        | 56       |
| 9. Wugigarra Australia                                       | 22      |        | 6       | 28    | 3        | 84       |
| 10. Holocneminus (exc. huangdi)                              | 2       |        | 6       | 8     | 3        | 24       |
| 11. MACN270 + Br16-44                                        |         |        | 2       | 2     | 3        | 8        |
| 12. Br16-50 + Br16-178                                       |         |        | 3       | 3     | 3        | 9        |
| 13. Tupigea                                                  | 12      |        | 9       | 21    | 3        | 63       |
| 14. Chibchea                                                 | 16      |        | 12      | 28    | 3        | 84       |
| 15. Br16-196                                                 |         |        | 1       | 1     | 3        | 3        |
| 16. Br15-45                                                  |         |        | 1       | 1     | 3        | 3        |
| 17. Waunana + Pisaboa                                        | 8       |        |         | 8     | 3        | 24       |
| 18. Ciboneya                                                 | 4       |        |         | 4     | 2        | 8        |
| 19. Ixchela                                                  | 20      |        |         | 20    | 2        | 40       |
| 20. 'Coryssocnemis' Centr. Amer.                             | 4       |        |         | 4     | 3        | 12       |
| 21. Psilochorus                                              | 43      | -7     |         | 36    | 2        | 72       |
| 22. 'Psilochorus' South Amer.                                | 2       |        | 4       | 6     | 3        | 18       |
| 23. Tainonia                                                 | 5       |        |         | 5     | 2        | 10       |
| 24. Modisimus + Anopsicus + Platnicknia                      | 147     |        | 95      | 238   | 2        | 476      |
| 25. Otavaloa + Mesabolivar + Teuia + Litoporus               | 81      | -2     | 28      | 107   | 3        | 321      |
| 26. Stenosfemuraia + Systemita + Mecolaestus + Coryssocnemis | 36      | -4     | 6       | 38    | 3        | 114      |
| 27. Aymaria                                                  | 7       |        | 2       | 9     | 3        | 27       |
| 29. Hoplopholcus                                             | 10      |        | 8       | 18    | 2        | 36       |
| 30. 'Holocnemus' hispanicus                                  | 1       |        |         | 1     | 2        | 2        |
| 31. Stygopholcus                                             | 3       |        |         | 3     | 2        | 6        |
| 32. 'Holocnemus' caudatus                                    | 1       |        |         | 1     | 2        | 2        |
| 33. Crossopriza                                              | 7       |        | 19      | 26    | 2        | 52       |
| 34. Smeringopus (exc. rubrotinctus & chogoria groups)        | 48      |        | 20      | 68    | 2        | 136      |
| 35. Smeringopus rubrotinctus + chogoria groups               | 7       |        |         | 7     | 2        | 14       |
| 36. Smeringopina guineensis group                            | 3       |        |         | 3     | 2        | 6        |
| 37. Smeringopina (exc. guineensis group)                     | 41      |        | 5       | 46    | 3        | 138      |
| 38. 'Spermophora' kyambura                                   | 1       |        |         | 1     | 3        | 3        |
| 39. Spermophora (true)                                       | 3       |        |         | 3     | 2        | 6        |
| 40. 'Spermophora' akwamu etc.                                | 3       |        | 1       | 4     | 3        | 12       |
| 41. Belisana + Hantu                                         | 114     |        | 36      | 150   | 3        | 450      |
| 42. 'Spermophora' ziama + tonkoui                            | 2       |        |         | 2     | 3        | 6        |
| 43. Wanniyala                                                | 2       |        | 6       | 8     | 2        | 16       |
| 44. 'Paramicromerys CAS13'                                   |         |        | 1       | 1     | 3        | 3        |
| 45. 'Spermophora' awalai etc.                                | 6       |        | 1       | 7     | 3        | 21       |
| 46. Spermophorides                                           | 34      |        |         | 34    | 2        | 68       |
| 47. Paramicromerys                                           | 14      | 2      | 11      | 27    | 3        | 81       |
| 48. Savarna                                                  | 5       |        |         | 5     | 3        | 15       |
| 49. 'Spermophora' mau etc.                                   | 6       |        | 2       | 8     | 3        | 24       |
| 50. Buitinga                                                 | 22      |        | 4       | 26    | 3        | 78       |
| 51. Ind206                                                   |         |        | 1       | 1     | 3        | 3        |
| 52. 'Spermophora' SE Asia + Australia                        | 13      |        | 7       | 20    | 3        | 60       |
| 53. Aetana                                                   | 18      |        | 6       | 24    | 3        | 72       |

| Node                                                               | Current | Mispl. | Unpubl. | C-M+U | Mult. by | Estimate |
|--------------------------------------------------------------------|---------|--------|---------|-------|----------|----------|
| 54. Zatavua                                                        | 17      |        | 11      | 28    | 3        | 84       |
| 55. Nyikoa                                                         | 1       |        |         | 1     | 2        | 2        |
| 56. Anansus                                                        | 5       |        | 1       | 6     | 3        | 18       |
| 57. Metagonia                                                      | 84      |        | 35      | 119   | 3        | 357      |
| 58. Khorata                                                        | 33      |        |         | 33    | 3        | 99       |
| 59. Quamtana                                                       | 26      |        | 10      | 36    | 3        | 108      |
| 60. 'Calapnita' phyllicola group                                   | 10      |        |         | 10    | 2        | 20       |
| 61. Pholcus minang group                                           | 6       | -1     | 1       | 6     | 3        | 18       |
| 62. Pholcus diopsis                                                | 1       |        |         | 1     | 3        | 3        |
| 63. Pholcus ethagala group SE Asia                                 | 8       |        |         | 8     | 3        | 24       |
| 64. Pholcus domingo group                                          | 2       |        |         | 2     | 3        | 6        |
| 65. Pholcus kerinci group                                          | 2       |        | 1       | 3     | 3        | 9        |
| 66. Pholcus ethagala group Sri Lanka                               | 3       |        | 1       | 4     | 2        | 8        |
| 67. Panjange lanthana group + cavicola group                       | 14      |        | 2       | 16    | 3        | 48       |
| 68. Pholcus chengpoi group                                         | 2       |        |         | 2     | 3        | 6        |
| 69. Pholcus tambunan group                                         | 2       |        |         | 2     | 3        | 6        |
| 70. Pholcus krabi group                                            | 6       |        | 1       | 7     | 3        | 21       |
| 71. Calapnita (true)                                               | 15      |        |         | 15    | 2        | 30       |
| 72. Pholcus andulau group                                          | 2       |        |         | 2     | 3        | 6        |
| 73. 'Panjange' nigrifrons group                                    | 9       |        |         | 9     | 3        | 27       |
| 74. Pholcus buatong group                                          | 3       |        |         | 3     | 3        | 9        |
| 75. Uthina                                                         | 14      |        | 3       | 17    | 2        | 34       |
| 76. Pholcus phungiformes group + yichengicus group + taishan group | 112     |        | 6       | 118   | 2        | 236      |
| 77. Pholcus mentawir                                               | 1       |        |         | 1     | 3        | 3        |
| 78. Pholcus bidentatus group                                       | 32      |        | 1       | 33    | 2        | 66       |
| 79. Micropholcus                                                   | 15      | 1      | 3       | 19    | 2        | 38       |
| 80. Pholcus halabala group (incl. quinquenotatus group)            | 24      |        | 2       | 26    | 3        | 78       |
| 81. 'Leptopholcus' podophthalmus                                   | 2       |        |         | 2     | 2        | 4        |
| 82. Micromerys                                                     | 9       |        |         | 9     | 3        | 27       |
| 83. Pehrforsskalia                                                 | 3       |        |         | 3     | 2        | 6        |
| 84. Leptopholcus +                                                 | 22      | -2     | 3       | 23    | 2        | 46       |
| 85. Pholcus opilionoides group + kingi group + crypticolens group  | 24      | -1     |         | 23    | 2        | 46       |
| 86. Pholcus Macaronesia + Cape Verde                               | 25      |        | 1       | 26    | 2        | 52       |
| 87. Pholcus taarab group                                           | 3       |        |         | 3     | 2        | 6        |
| 88. Pholcus calligaster group                                      | 5       |        |         | 5     | 2        | 10       |
| 89. Pholcus ancoralis group                                        | 6       |        |         | 6     | 3        | 18       |
| 90. Pholcus gracillimus group                                      | 9       | -1     |         | 8     | 2        | 16       |
| 91. Pholcus bicornutus group                                       | 8       |        | 2       | 10    | 2        | 20       |
| 92. Pholcus kakum + MRAC553 ('bamboutos group' part 2)             | 1       |        | 1       | 2     | 3        | 6        |
| 93. Pholcus lamperti group                                         | 8       |        |         | 8     | 3        | 24       |
| 94. Pholcus Gui32                                                  | 1       |        |         | 1     | 3        | 3        |
| 95. Pholcus debilis group                                          | 4       | 2      |         | 6     | 3        | 18       |
| 96. Pholcus moca + punu ('bamboutos group' part 1)                 | 2       |        |         | 2     | 3        | 6        |
| 97. Sihala                                                         | 2       |        | 4       | 6     | 2        | 12       |
| 98. Pholcus phalangioides group                                    | 11      |        |         | 11    | 2        | 22       |
| 99. Pholcus chappuisi group                                        | 8       |        |         | 8     | 3        | 24       |
| 100. Pholcus bamboutos ('bamboutos group' part 3)                  | 1       |        |         | 1     | 3        | 3        |
| 101. Pholcus rawiriae + leruthi ('circularis group' part 1)        | 3       |        |         | 3     | 3        | 9        |
| 102. Pholcus guineensis group                                      | 5       |        |         | 5     | 2        | 10       |
| Totals                                                             | 1501    | -15    | 430     | 1912  |          | 4850     |

**Table S7:** Models of diversification rates that were used with HiSSE. All models were evaluated for all dated trees (MCMCtree, treePL, and RelTime), choosing the best fitting one by the AIC value.

| model | hidden states | turnover rates | extinction fractions |
|-------|---------------|----------------|----------------------|
| 1a    | no            | equal          | equal                |
| 1b    | no            | varying        | equal                |
| 1c    | no            | equal          | varying              |
| 1d    | no            | varying        | varying              |
| 2a    | yes           | equal          | equal                |
| 2b    | yes           | varying        | equal                |
| 2c    | yes           | equal          | varying              |
| 2d    | yes           | varying        | varying              |

**Table S8:** Correlation of tibia to metatarsus ratio of leg 1 among microhabitats inferred with PGLS. (G) = ground; (S) = space; (L) = leave

| time tree | G – S  | G – L  | S – L | p-value |
|-----------|--------|--------|-------|---------|
| treePL    | -0.050 | -0.031 | 0.472 | <0.001  |
| MCMCtree  | -0.129 | -0.098 | 0.423 | <0.001  |
| RelTime   | -0.039 | -0.029 | 0.538 | <0.001  |

**Table S9:** Phylogenetic signal in the tibia to metatarsus ratio of leg 1. Given are Blomberg’s K and Pagel’s lambda along with the respective p-values.

| time tree | K   | $p_{rand}$ | lambda | $p_{lrt}$ |
|-----------|-----|------------|--------|-----------|
| treePL    | 1.9 | 0.001      | 0.96   | 6.9e-164  |
| MCMCtree  | 2.4 | 0.001      | 0.99   | 1.4e-159  |
| RelTime   | 1.8 | 0.001      | 0.97   | 5.1e-150  |

**Table S10:** Speciation ( $\lambda$ ) and extinction ( $\mu$ ) rates estimated with MuSSE for all available pholcid species.

| time tree | species numbers | $\lambda_{ground}$ | $\lambda_{leaf}$   | $\lambda_{space}$  | $\mu_{ground}$      | $\mu_{leaf}$        | $\mu_{space}$       |
|-----------|-----------------|--------------------|--------------------|--------------------|---------------------|---------------------|---------------------|
| treePL    | estimated       | 0.031              | 0.129              | 0.086              | 0.013               | 0.112               | 0.073               |
| MCMCtree  | estimated       | 0.026              | 0.032 <sup>a</sup> | 0.032 <sup>a</sup> | 0.0012 <sup>b</sup> | 0.0012 <sup>b</sup> | 0.0012 <sup>b</sup> |
| RelTime   | estimated       | 0.113              | 0.314              | 0.118              | 0.036               | 0.205               | 0.012               |
| treePL    | curr. descr.    | 0.016              | 0.053              | 0.036              | 0.000               | 0.038               | 0.023               |
| MCMCtree  | curr. descr.    | 0.018              | 0.022 <sup>a</sup> | 0.022 <sup>a</sup> | 0.000 <sup>b</sup>  | 0.000 <sup>b</sup>  | 0.000 <sup>b</sup>  |
| RelTime   | curr. descr.    | 0.064              | 0.143              | 0.078              | 0.000               | 0.047               | 0.000               |

<sup>a/b</sup> values marked with the same letter were estimated as one parameter.

**Table S11:** Speciation ( $\lambda$ ) and extinction ( $\mu$ ) rates estimated with MuSSE for tropical species only.

| time tree | species numbers | $\lambda_{ground}$ | $\lambda_{leaf}$   | $\lambda_{space}$  | $\mu_{ground}$      | $\mu_{leaf}$        | $\mu_{space}$       |
|-----------|-----------------|--------------------|--------------------|--------------------|---------------------|---------------------|---------------------|
| treePL    | estimated       | 0.037              | 0.095              | 0.076              | 0.022               | 0.076               | 0.056               |
| MCMCtree  | estimated       | 0.027              | 0.033 <sup>a</sup> | 0.033 <sup>a</sup> | 0.0036 <sup>b</sup> | 0.0036 <sup>b</sup> | 0.0036 <sup>b</sup> |
| RelTime   | estimated       | 0.103              | 0.244              | 0.164              | 0.022               | 0.136               | 0.053               |
| treePL    | curr. descr.    | 0.015              | 0.039              | 0.031              | 0.000               | 0.021               | 0.012               |
| MCMCtree  | curr. descr.    | 0.018              | 0.022 <sup>a</sup> | 0.022 <sup>a</sup> | 0.000 <sup>b</sup>  | 0.000 <sup>b</sup>  | 0.000 <sup>b</sup>  |
| RelTime   | curr. descr.    | 0.064              | 0.096 <sup>a</sup> | 0.096 <sup>a</sup> | 0.000 <sup>b</sup>  | 0.000 <sup>b</sup>  | 0.000 <sup>b</sup>  |

<sup>a/b</sup> values marked with the same letter were estimated as one parameter

**Table S12:** Net diversification rates estimated with MuSSE (all species / tropical species).

| time tree | species numbers | ground      | leaf        | space       |
|-----------|-----------------|-------------|-------------|-------------|
| treePL    | estimated       | 0.018/0.015 | 0.017/0.019 | 0.013/0.020 |
| MCMCtree  | estimated       | 0.025/0.023 | 0.031/0.029 | 0.031/0.029 |
| RelTime   | estimated       | 0.077/0.081 | 0.110/0.110 | 0.110/0.110 |
| treePL    | curr. descr.    | 0.016/0.015 | 0.015/0.018 | 0.013/0.019 |
| MCMCtree  | curr. descr.    | 0.018/0.018 | 0.022/0.022 | 0.022/0.022 |
| RelTime   | curr. descr.    | 0.064/0.064 | 0.096/0.096 | 0.078/0.096 |

**Table S13:** Speciation ( $\lambda$ ) and extinction ( $\mu$ ) rates estimated with HiSSE.

| tree     | species numbers | $\lambda_{ground}$ | $\lambda_{leaf+space}$ | $\lambda_{hidden}$ | $\mu_{ground}$ | $\mu_{leaf+space}$ | $\mu_{hidden}$ |
|----------|-----------------|--------------------|------------------------|--------------------|----------------|--------------------|----------------|
| MCMCtree | curr. descr.    | 0.0205             | 0.0205                 | 0.0000             | 0.0000         | 0.0000             | 0.0000         |
| MCMCtree | estimated       | 0.0313             | 0.0313                 | 0.0122             | 0.0018         | 0.0018             | 0.0000         |
| RelTime  | curr. descr.    | 0.2228             | 0.2247                 | 0.0445             | 0.1197         | 0.1178             | 0.0096         |
| RelTime  | estimated       | 0.5697             | 0.5716                 | 0.0820             | 0.4707         | 0.4688             | 0.0271         |
| treePL   | curr. descr.    | 0.0085             | 0.0578                 | 0.0457             | 0.0044         | 0.0300             | 0.0241         |
| treePL   | estimated       | 0.1447             | 0.1514                 | 0.0163             | 0.1281         | 0.1214             | 0.0000         |

**Table S14:** Net diversification rates and best fit models estimated with HiSSE.

| tree     | species numbers | ground | leaf+space | hidden | best fit model                                                       |
|----------|-----------------|--------|------------|--------|----------------------------------------------------------------------|
| MCMCtree | curr. descr.    | 0.0205 | 0.0205     | 0.0000 | no hidden states, equal turnover rates and extinction fractions      |
| MCMCtree | estimated       | 0.0295 | 0.0295     | 0.0122 | hidden states, equal turnover rates and extinction fractions         |
| RelTime  | curr. descr.    | 0.1031 | 0.1069     | 0.0348 | hidden states, equal turnover rates and varying extinction fractions |
| RelTime  | estimated       | 0.0990 | 0.1028     | 0.0549 | hidden states, equal turnover rates and varying extinction fractions |
| treePL   | curr. descr.    | 0.0041 | 0.0278     | 0.0217 | hidden states, varying turnover rates and equal extinction fractions |
| treePL   | estimated       | 0.0165 | 0.0300     | 0.0163 | hidden states, equal turnover rates and varying extinction fractions |
